# Supplementary material
Source: publisher figshare collection journal article supplement (https://gsajournals.figshare.com/articles/dataset/_/14883732)
Supplement: Supplementary file 1 [file 1]

## Sheet: Table_S3
Table S3. Results of DESeq2 analysis of RNA-seq data from S. macrospora wild type and deletion mutants for asm2, asm3, and spt3.
The following comparisons were analyzed:
column name	strain 1	condition 1	strain 2	condition 2
asm2_M_vs_wt_M_log2FoldChange	Dasm2	mycelium	wild type	mycelium
asm3_M_vs_wt_M_log2FoldChange	Dasm3	mycelium	wild type	mycelium
spt3_M_vs_wt_M_log2FoldChange	Dspt3	mycelium	wild type	mycelium
wt_P_vs_wt_M_log2FoldChange	wild type	perithecia	wild type	mycelium
asm2_P_vs_wt_M_log2FoldChange	Dasm2	perithecia	wild type	mycelium
asm3_P_vs_wt_M_log2FoldChange	Dasm3	perithecia	wild type	mycelium
asm2_P_vs_wt_P_log2FoldChange	Dasm2	perithecia	wild type	perithecia
asm3_P_vs_wt_P_log2FoldChange	Dasm3	perithecia	wild type	perithecia
The table gives the results as log2 of fold changes and the adjusted p-values (padj) for each fold change value.
locus_tag	baseMean	asm2_M_vs_wt_M_log2FoldChange	asm2_M_vs_wt_M_padj	asm3_M_vs_wt_M_log2FoldChange	3952_M_vs_wt_M_padj	spt3_M_vs_wt_M_log2FoldChange	spt3_M_vs_wt_M_padj	wt_P_vs_wt_M_log2FoldChange	wt_P_vs_wt_M_padj	asm2_P_vs_wt_M_log2FoldChange	asm2_P_vs_wt_M_padj	asm3_P_vs_wt_M_log2FoldChange	3952_P_vs_wt_M_padj	asm2_P_vs_wt_P_log2FoldChange	asm2_P_vs_wt_P_padj	asm3_P_vs_wt_P_log2FoldChange	3952_P_vs_wt_P_padj
SMAC_00000.3_t1	1970.19	0.341016	0.552876	0.615456	0.141178	-2.19935	4.63901e-11	1.59357	4.0403e-06	2.12039	3.29519e-10	2.58937	5.09138e-15	0.526821	0.258417	0.995805	0.00962383
SMAC_00001.3_t1	366.375	-0.145977	0.810366	0.462543	0.221181	1.58092	4.53899e-08	-0.164942	0.712614	-0.084915	0.871904	-0.303115	0.50778	0.0800269	0.892455	-0.138173	0.800239
SMAC_00002.3_t1	774.849	-0.729354	0.156878	0.51062	0.261082	-0.716437	0.05329	0.281041	0.57302	0.112694	0.856755	1.0413	0.0106167	-0.168347	0.796492	0.760259	0.0890971
SMAC_00003.3_t1	1425.38	-0.328818	0.541412	-0.465972	0.244038	-1.40391	7.03842e-06	0.447743	0.252581	0.232839	0.621963	0.153578	0.779437	-0.214905	0.696112	-0.294165	0.544851
SMAC_00004.3_t1	53.4653	0.207646	0.830566	0.0271958	0.969248	2.02985	4.21834e-06	0.309883	0.645357	0.489338	0.44577	0.326367	0.679702	0.179456	0.837423	0.0164841	0.985319
SMAC_00005.3_t1	47.22	-1.79838	0.0404895	-3.9244	1.39796e-05	-3.9022	4.4645e-07	0.930203	0.224418	0.138991	0.901481	-3.95828	2.37451e-05	-0.791212	0.394375	-4.88848	9.58653e-08
SMAC_00006.3_t1	862.365	-0.418928	0.27501	-0.812412	0.00710098	-0.958155	0.000135932	0.0158803	0.967785	-0.21893	0.544447	-0.669688	0.0245347	-0.23481	0.567006	-0.685568	0.0225396
SMAC_00007.3_t1	140.099	-1.21153	0.0214886	-0.502877	0.327646	-1.71106	4.55441e-05	2.497	1.41847e-11	1.29221	0.00158923	-0.434892	0.465808	-1.20479	0.00434841	-2.93189	1.65597e-13
SMAC_00008.3_t1	9.62037	-0.222463	0.931645	1.95366	0.10866	-0.451681	0.741111	2.46205	0.0222224	1.84606	0.12609	2.17422	0.0754604	-0.615987	0.688967	-0.287825	0.86265
SMAC_00009.3_t1	260.212	0.609144	0.520818	-0.747713	0.3104	1.84411	0.000972323	-0.608376	0.413663	2.01496	0.000887046	-0.110375	0.921831	2.62334	1.4581e-05	0.498001	0.578185
SMAC_00010.3_t1	99.1119	-0.376544	0.550176	-0.206215	0.697178	-0.71607	0.0616251	-3.26644	1.75388e-14	-2.36816	3.18636e-09	-1.4438	0.000805745	0.898276	0.138269	1.82264	0.000267029
SMAC_00011.3_t1	8.97705	-1.83654	0.268933	-0.791716	0.575496	-1.37345	0.220746	-1.44754	0.267699	-0.754692	0.617913	-1.45993	0.341561	0.692847	0.714344	-0.0123886	0.995081
SMAC_00012.3_t1	31.8282	-0.354032	0.712857	-0.0328099	0.963908	0.0229575	0.970513	0.00430197	0.995335	0.414489	0.540354	0.860028	0.166427	0.410187	0.61265	0.855726	0.189556
SMAC_00013.3_t1	561.94	0.511578	0.315914	0.851605	0.032179	-1.01498	0.00238813	0.175288	0.720614	0.403247	0.364426	0.545822	0.206354	0.227959	0.690188	0.370534	0.446616
SMAC_00014.3_t1	3180.86	0.016353	0.972699	0.229449	0.448389	0.691182	0.00253247	-0.0627465	0.866697	-0.455565	0.104283	-0.25253	0.446917	-0.392819	0.208966	-0.189784	0.596236
SMAC_00015.3_t1	150.086	-0.124668	0.843498	-0.683798	0.0807707	-1.1733	0.00025093	0.378523	0.325879	0.571196	0.12609	0.303806	0.511864	0.192673	0.718918	-0.0747174	0.900253
SMAC_00017.3_t1	463.45	0.959926	0.0678042	0.877834	0.0651932	1.57777	3.70137e-05	-1.24423	0.00382834	-0.464377	0.384729	-0.114211	0.873946	0.779851	0.136445	1.13002	0.0155131
SMAC_00018.3_t1	825.583	-0.0639643	0.941844	-0.436968	0.391074	0.117433	0.802566	-0.343121	0.516776	-0.09687	0.887853	-0.276445	0.656596	0.246251	0.720856	0.0666761	0.932449
SMAC_00019.3_t1	113.442	0.610469	0.261086	0.121903	0.824026	0.665064	0.0719416	0.897597	0.023892	1.00492	0.0119514	0.325113	0.56519	0.107322	0.874049	-0.572484	0.25139
SMAC_00020.3_t1	159.154	0.176573	0.838181	0.0321239	0.960054	-0.428836	0.36232	-0.42944	0.448478	-0.0536136	0.942644	-0.874184	0.114143	0.375827	0.59879	-0.444743	0.511551
SMAC_00021.3_t1	23.8895	0.475168	0.724491	0.544072	0.574554	3.05215	1.59485e-06	0.991512	0.237027	0.819026	0.376312	-1.07969	0.396051	-0.172485	0.894963	-2.0712	0.0557461
SMAC_00022.3_t1	10364.5	1.8036	0.259176	2.55714	0.0474888	0.705717	0.559584	0.140956	0.936924	1.65828	0.224735	-1.82294	0.185018	1.51733	0.318135	-1.96389	0.151272
SMAC_00023.3_t1	24.2699	-0.721372	0.458597	1.2422	0.0456896	0.988947	0.0601575	-0.266341	0.749162	0.362248	0.644333	0.531257	0.516058	0.628589	0.45793	0.797598	0.324565
SMAC_00024.3_t1	558.871	1.23452	0.0108923	1.23545	0.00825233	1.93826	4.10866e-07	-1.19368	0.00635906	-0.0296148	0.966809	-0.127165	0.860633	1.16406	0.0148263	1.06651	0.0257789
SMAC_00025.3_t1	3.28513	0.829241	NA	-0.0660801	0.978182	-0.171432	0.931614	1.31307	0.500742	0.145389	0.957637	1.02423	NA	-1.16768	NA	-0.288842	0.92037
SMAC_00026.3_t1	991.125	0.398791	0.463521	-0.0309335	0.951635	-0.185961	0.627929	-0.514697	0.203497	0.0981526	0.865638	-0.0998955	0.869448	0.61285	0.167488	0.414801	0.387384
SMAC_00027.3_t1	170.403	1.6382	6.25879e-05	0.67485	0.145008	1.00803	0.00658419	0.619768	0.162936	1.01107	0.01572	0.274059	0.653248	0.391305	0.497607	-0.345708	0.555776
SMAC_00028.3_t1	109.311	-0.270756	0.68635	-0.0521477	0.924296	-1.10357	0.00315434	0.490109	0.257386	0.423176	0.370156	0.616106	0.179822	-0.0669334	0.924211	0.125996	0.843541
SMAC_00029.3_t1	614.795	0.234113	0.761182	0.0900482	0.882234	-2.70675	2.29028e-11	0.924529	0.040689	1.18522	0.00775153	1.55751	0.000249537	0.260692	0.706573	0.632983	0.23382
SMAC_00030.3_t1	36.301	2.35764	0.000910464	1.09195	0.163552	-6.73464	4.41669e-05	-1.22139	0.144687	1.15151	0.134713	1.23265	0.122805	2.3729	0.00268495	2.45403	0.00176075
SMAC_00031.3_t1	10.104	0.847029	0.566434	0.137589	0.919743	-5.84844	0.000858057	-1.37001	0.255525	0.320708	0.825355	0.398357	0.801104	1.69072	0.200962	1.76837	0.178382
SMAC_00032.3_t1	20.9492	0.294289	0.832006	0.219025	0.830301	-1.76278	0.0260403	-1.1208	0.205327	0.732952	0.425287	0.0108064	0.992911	1.85375	0.0356836	1.1316	0.27999
SMAC_00033.3_t1	34.1632	0.457821	0.782364	0.148511	0.909477	0.330978	0.738728	0.495958	0.687084	1.36825	0.196324	0.186492	0.912003	0.872289	0.50714	-0.309466	0.842309
SMAC_00034.3_t1	55.4965	-0.720474	0.348676	-1.00578	0.102376	-0.908961	0.0740103	-0.80521	0.169964	0.0982666	0.906491	-0.479569	0.517857	0.903477	0.167488	0.325641	0.702813
SMAC_00035.3_t1	16.6729	0.337169	0.817248	0.0279725	0.980303	-1.80879	0.0461089	0.355979	0.739521	1.64208	0.0385908	0.801308	0.444159	1.2861	0.156514	0.44533	0.714256
SMAC_00036.3_t1	226.101	0.156448	0.878207	-1.01449	0.0915288	-3.95121	3.22605e-15	-1.64921	0.00175384	-1.62254	0.00257693	-3.51113	3.66708e-11	0.0266606	0.979091	-1.86193	0.00178688
SMAC_00037.3_t1	12.6244	-1.52678	0.351627	0.787097	0.523436	-3.64062	0.0107875	0.220556	0.884918	0.419285	0.780143	0.72977	0.616435	0.198729	0.916139	0.509214	0.748703
SMAC_00038.3_t1	100.968	0.615308	0.357369	0.443843	0.433295	-3.48188	8.85377e-11	-0.894885	0.080057	0.320619	0.611791	0.472825	0.450435	1.2155	0.0215993	1.36771	0.00740252
SMAC_00039.3_t1	89.2888	0.196829	0.784645	0.363208	0.454005	-1.86468	2.36294e-06	-0.175647	0.753032	-1.18192	0.00518577	-1.01912	0.0295887	-1.00628	0.0321914	-0.843474	0.0956373
SMAC_00040.3_t1	164.473	0.653032	0.11942	0.149729	0.736648	0.497933	0.110336	0.63218	0.0657849	-0.162523	0.737368	-0.0925692	0.871891	-0.794703	0.030715	-0.724749	0.0578338
SMAC_00041.3_t1	287.125	0.00855782	0.994034	-0.279444	0.699409	3.98472	8.11362e-18	0.796136	0.178893	0.685088	0.289748	0.1871	0.835173	-0.111048	0.910351	-0.609036	0.400437
SMAC_00042.3_t1	806.643	-0.524226	0.128562	0.0367424	0.92179	0.737704	0.00234728	-0.438814	0.128695	-1.09889	1.97186e-05	-0.992516	0.000188818	-0.660073	0.0274766	-0.553702	0.0739114
SMAC_00043.3_t1	582.504	1.64471	0.00018799	0.556965	0.260602	-3.42121	1.47185e-16	-0.8548	0.059571	1.9434	1.18564e-06	0.84914	0.0764316	2.7982	1.24897e-12	1.70394	5.46322e-05
SMAC_00044.3_t1	147.94	-0.798839	0.254116	-0.152777	0.821257	1.78365	3.09802e-05	2.2052	5.96388e-07	1.09057	0.0320974	0.310221	0.668394	-1.11463	0.0328278	-1.89498	7.08393e-05
SMAC_00045.3_t1	42.1781	-0.942162	0.384703	-0.678321	0.444459	2.57491	1.40724e-05	0.33443	0.719796	0.0728229	0.947941	0.831108	0.342373	-0.261607	0.822463	0.496677	0.619565
SMAC_00046.3_t1	356.806	-0.7322	0.352719	-1.46586	0.0160559	-0.786528	0.136236	-0.0462445	0.955255	-0.202385	0.809606	0.456669	0.546197	-0.15614	0.871991	0.502914	0.508918
SMAC_00047.3_t1	838.035	-0.137303	0.766362	-0.253574	0.421319	-0.825285	0.000556549	1.2513	1.86491e-07	-0.520066	0.0695668	-0.45499	0.137635	-1.77137	1.03536e-13	-1.70629	1.33086e-12
SMAC_00048.3_t1	654.926	0.38525	0.597255	0.657879	0.208926	0.594747	0.177774	0.483913	0.367956	0.311477	0.617022	0.156506	0.834848	-0.172437	0.82264	-0.327407	0.619131
SMAC_00049.3_t1	793.928	0.112193	0.836422	0.137909	0.72332	-0.338647	0.239433	0.297566	0.391257	-0.131476	0.762305	0.235211	0.565444	-0.429042	0.248125	-0.0623553	0.903937
SMAC_00050.3_t1	183.081	0.206231	0.761305	0.272158	0.571264	2.09635	1.99669e-10	0.901945	0.0188782	-0.059426	0.923133	-0.267284	0.645277	-0.961371	0.0215793	-1.16923	0.0045768
SMAC_00051.3_t1	66.3332	-0.484552	0.487659	-0.182324	0.76632	-0.962389	0.0262086	-1.1673	0.013527	-0.726011	0.165944	-0.137978	0.856696	0.441287	0.527807	1.02932	0.0571052
SMAC_00052.3_t1	3.17404	0.781576	NA	0.486668	0.860663	-1.45732	0.534148	0.23653	0.938528	-0.509419	0.878013	1.05289	NA	-0.745949	NA	0.816363	0.802626
SMAC_00053.3_t1	81.901	-0.993797	0.396746	-1.81634	0.04534	-6.88756	7.9707e-08	0.242033	0.833946	0.248343	0.840165	-0.384392	0.759085	0.00630999	0.996538	-0.626425	0.581484
SMAC_00054.3_t1	2.98638	0.98432	NA	-1.15736	0.600183	-4.32697	0.037732	-0.651856	0.775469	-0.405301	0.872096	-0.163155	NA	0.246555	NA	0.488701	0.867144
SMAC_00055.3_t1	1.76549	2.98499	NA	3.19346	0.232232	-1.68786	0.566512	-0.377948	0.929614	0.525069	0.900208	0.428402	NA	0.903017	NA	0.80635	0.873152
SMAC_00056.3_t1	2.19606	3.07466	NA	2.18461	0.492233	2.26863	0.377289	4.20918	0.103411	2.39103	0.452957	3.23137	NA	-1.81814	NA	-0.977808	0.746997
SMAC_00057.3_t1	0.109039	-0.710968	NA	-0.680139	NA	-0.91913	0.90713	0.371804	0.969671	-1.15026	0.916296	-0.200567	NA	-1.52206	NA	-0.572371	0.962342
SMAC_00058.3_t1	360.462	-0.866751	0.398591	-0.0354666	0.969488	-11.3975	2.35005e-12	-2.73123	5.29985e-05	-0.568857	0.532752	0.863077	0.325112	2.16238	0.00382555	3.59431	6.93604e-08
SMAC_00059.3_t1	7.78957	-1.01869	0.591623	0.332495	0.829111	-6.28646	0.00063797	-3.95594	0.0165648	-1.97482	0.16389	-0.2162	0.918288	1.98112	0.391271	3.73974	0.0402706
SMAC_00060.3_t1	0.474436	-0.524098	NA	2.4165	NA	0.721337	0.923103	-0.841101	0.931772	-0.963391	0.924565	1.63899	NA	-0.12229	NA	2.4801	0.808706
SMAC_00061.3_t1	66.0237	-0.175548	0.880516	-0.494707	0.516977	-0.30634	0.632725	2.79661	8.57147e-08	1.37466	0.0222048	0.463613	0.584374	-1.42195	0.0184157	-2.333	4.33267e-05
SMAC_00063.3_t1	110.672	-0.18628	0.826707	-0.0885443	0.89012	-1.74243	9.35789e-05	1.67862	6.62226e-05	0.419797	0.458909	0.105297	0.894195	-1.25882	0.0074732	-1.57332	0.00056455
SMAC_00064.3_t1	49.1483	0.28371	0.80206	-1.3776	0.0751653	-0.476129	0.462113	1.21668	0.0506093	1.41265	0.0235789	1.51732	0.0169123	0.195968	0.844951	0.300639	0.741887
SMAC_00065.3_t1	303.255	-0.250068	0.680328	-0.227363	0.618312	-0.530629	0.121663	-0.555748	0.156452	-0.195173	0.70053	0.339924	0.478425	0.360575	0.482986	0.895672	0.0211748
SMAC_00066.3_t1	844.406	-0.192794	0.711393	-0.54777	0.108128	-1.11863	4.47972e-05	0.359636	0.296628	0.610336	0.0619197	0.408949	0.268575	0.250701	0.574952	0.0493133	0.928506
SMAC_00067.3_t1	11247.6	0.247003	0.597911	0.105051	0.793146	-0.50623	0.0677556	-0.0689098	0.875037	0.524184	0.112068	0.193981	0.648909	0.593094	0.080981	0.262891	0.519861
SMAC_00068.3_t1	362.159	-0.0593687	0.931919	0.508473	0.18557	1.32225	1.0038e-05	-0.13894	0.76944	-0.33205	0.435802	-0.267734	0.578715	-0.193111	0.72666	-0.128794	0.818076
SMAC_00069.3_t1	1590.59	-0.399592	0.565357	-1.03426	0.0356603	-0.468213	0.285561	0.0146812	0.981204	0.406759	0.471568	0.43109	0.466766	0.392078	0.547598	0.416409	0.495835
SMAC_00070.3_t1	2053.89	0.111177	0.835607	-0.177367	0.63169	-1.41381	5.63503e-08	0.896798	0.00145801	2.02967	4.9522e-15	1.77389	1.34564e-11	1.13288	6.65512e-05	0.877091	0.00285262
SMAC_00071.3_t1	606.166	0.29726	0.676926	0.568548	0.242738	4.33161	1.02051e-33	0.137311	0.821496	-0.469581	0.373337	-0.220122	0.742884	-0.606892	0.266681	-0.357433	0.558408
SMAC_00071.3_t2	0	NA	NA	NA	NA	NA	NA	NA	NA	NA	NA	NA	NA	NA	NA	NA	NA
SMAC_00073.3_t1	638.686	-0.290423	0.664796	-0.122247	0.822949	1.13873	0.00171879	0.6775	0.114205	0.777282	0.0762159	0.73947	0.103611	0.0997819	0.888027	0.0619699	0.932524
SMAC_00074.3_t1	439.543	0.0893452	0.89325	0.39333	0.327481	0.0776125	0.840363	-0.146208	0.759565	-0.113488	0.829725	0.138036	0.802557	0.0327197	0.959493	0.284244	0.558706
SMAC_00075.3_t1	2546.75	0.557171	0.284249	0.784597	0.0597753	-1.3436	7.12438e-05	-0.656944	0.10128	-0.667073	0.112661	-0.59076	0.182639	-0.0101295	0.987501	0.0661838	0.921545
SMAC_00075.3_t2	0	NA	NA	NA	NA	NA	NA	NA	NA	NA	NA	NA	NA	NA	NA	NA	NA
SMAC_00076.3_t1	1852.44	0.180248	0.608098	0.126426	0.653845	0.121023	0.597051	-0.26677	0.287526	0.107823	0.735794	0.0654861	0.856696	0.374594	0.158789	0.332256	0.213818
SMAC_00077.3_t1	480.382	-0.197412	0.662324	-0.184962	0.587312	-0.610388	0.0154372	-0.386812	0.197334	-0.493864	0.102602	0.313166	0.362883	-0.107052	0.816182	0.699978	0.0161167
SMAC_00078.3_t1	1501.2	-0.0623266	0.946574	0.482297	0.364236	-0.909817	0.0300331	-0.670526	0.174928	-1.09665	0.0198308	-0.828986	0.105149	-0.426124	0.512827	-0.15846	0.829237
SMAC_00079.3_t1	393.814	-0.428502	0.229937	-0.761763	0.00845767	-0.907587	0.000150231	0.146411	0.66944	-0.0113839	0.978544	-0.14107	0.726965	-0.157795	0.703586	-0.287481	0.414409
SMAC_00080.3_t1	5.49542	0.757069	0.728541	-0.827167	0.6627	-0.222363	0.882689	1.49196	0.273828	1.42485	0.327361	0.694846	0.728562	-0.0671115	0.975414	-0.797117	0.670272
SMAC_00081.3_t1	37.1932	-0.288557	0.809541	-0.432138	0.607411	-1.25218	0.0586818	1.26805	0.0418254	1.78253	0.00270289	1.78047	0.00372715	0.514478	0.543607	0.512421	0.533439
SMAC_00082.3_t1	5791.35	-0.634656	0.249558	-0.953385	0.0318851	-1.92211	8.12365e-08	-0.621094	0.157481	-0.595404	0.203365	-0.358323	0.511015	0.0256907	0.973375	0.262772	0.657085
SMAC_00083.3_t1	938.506	-0.0850686	0.865668	-0.0979063	0.786857	0.0129679	0.965583	-0.0469565	0.907079	-0.00962999	0.981258	-0.120794	0.774492	0.0373266	0.939606	-0.0738375	0.868806
SMAC_00084.3_t1	230.716	0.117131	0.827307	0.00996803	0.980416	-0.526118	0.0578207	0.0474723	0.914825	0.22696	0.547188	-0.256291	0.531673	0.179488	0.697462	-0.303763	0.457293
SMAC_00085.3_t1	1630.05	-0.0139582	0.975378	-0.506696	0.061932	0.0543866	0.841609	-0.264214	0.350523	-0.112456	0.752217	-0.252026	0.429602	0.151757	0.694357	0.0121882	0.978518
SMAC_00086.3_t1	2183.58	-0.067379	0.904254	-0.580265	0.0704682	-0.943784	0.000282283	0.149543	0.696859	-0.0393001	0.929846	-0.409524	0.238577	-0.188843	0.674628	-0.559068	0.0872881
SMAC_00087.3_t1	1062.07	-0.265482	0.501606	-0.177519	0.583764	0.489775	0.0417045	0.930733	0.000150873	-0.435177	0.137626	-0.611867	0.0291608	-1.36591	1.611e-08	-1.5426	1.44066e-10
SMAC_00088.3_t1	835.782	-0.672008	0.228103	-1.18247	0.00838504	-0.504406	0.206102	-0.286054	0.586449	-0.364876	0.487336	-0.572295	0.25427	-0.0788216	0.917893	-0.28624	0.630572
SMAC_00089.3_t1	491.537	-0.493383	0.530183	-0.937469	0.103402	0.553257	0.267409	0.367682	0.567969	0.294837	0.679431	0.083814	0.926613	-0.0728459	0.938173	-0.283868	0.714256
SMAC_00090.3_t1	1123.14	-0.64413	0.336519	-0.975075	0.0645835	-1.63507	0.000131907	0.275051	0.65715	-0.167854	0.815053	-0.118382	0.87975	-0.442905	0.516761	-0.393433	0.552498
SMAC_00091.3_t1	1079.85	0.410766	0.498032	0.538592	0.240228	1.11925	0.00203029	-0.0741254	0.902216	-0.0344341	0.958356	0.110273	0.867832	0.0396913	0.958038	0.184398	0.768308
SMAC_00092.3_t1	541.172	-0.134321	0.762595	-0.625267	0.0271368	-0.915357	7.42916e-05	0.158819	0.625579	0.438113	0.119111	0.678927	0.00911606	0.279294	0.417166	0.520108	0.06618
SMAC_00093.3_t1	1697.33	-0.442339	0.267325	-0.853724	0.00640283	-2.3451	4.06945e-20	-0.341276	0.304969	-0.223912	0.555678	-0.0506047	0.921993	0.117364	0.809104	0.290671	0.45763
SMAC_00094.3_t1	565.663	-0.387011	0.38732	-0.519973	0.137272	1.05713	0.00011575	-0.496695	0.135607	-0.409352	0.262299	0.311156	0.441769	0.0873423	0.872662	0.807851	0.0138552
SMAC_00095.3_t1	2002.47	0.0565789	0.885401	0.211746	0.383711	1.06658	3.10844e-09	0.441699	0.0358021	-0.103663	0.726306	-0.072612	0.828651	-0.545361	0.0137411	-0.514311	0.0193236
SMAC_00096.3_t1	2254.22	-0.0877011	0.836768	0.266081	0.324028	-0.194256	0.402184	0.497381	0.0359333	0.109879	0.74369	0.663025	0.00464372	-0.387502	0.165263	0.165644	0.615179
SMAC_00097.3_t1	694.382	-0.291099	0.493185	-1.09265	0.000193469	-0.433092	0.103061	0.525519	0.0729197	-0.00739016	0.986347	0.0870348	0.850759	-0.532909	0.102029	-0.438485	0.192072
SMAC_00098.3_t1	99.8206	-0.369476	0.582564	0.450288	0.361297	-2.6949	4.25761e-10	-0.79097	0.0804104	-0.188925	0.759329	-0.17091	0.803964	0.602044	0.275478	0.62006	0.257359
SMAC_00099.3_t1	1298.44	-0.420825	0.360514	-0.724924	0.0420039	-1.17922	4.76907e-05	-0.132983	0.766602	-0.159971	0.732008	0.118614	0.819417	-0.0269882	0.963038	0.251596	0.58092
SMAC_00101.3_t1	590.826	-0.26777	0.70307	-1.11007	0.0140294	-0.697573	0.0718439	-0.00884615	0.987767	0.255539	0.649777	-0.021075	0.976132	0.264385	0.682439	-0.0122288	0.985494
SMAC_00102.3_t1	724.128	0.0219099	0.964153	0.149158	0.639481	0.5622	0.0137527	-0.0970381	0.781158	0.290944	0.334761	0.102078	0.799793	0.387982	0.209686	0.199116	0.577088
SMAC_00103.3_t1	2383.55	-0.0579856	0.953764	-1.24559	0.019221	-1.36743	0.0019682	0.268133	0.675681	1.614	0.00066828	1.13854	0.0271217	1.34587	0.00921282	0.870404	0.11998
SMAC_00104.3_t1	110.102	0.0395585	0.973823	0.76817	0.288986	-4.19613	3.86073e-08	-0.107127	0.910685	1.40481	0.0316596	1.7361	0.006116	1.51193	0.0276663	1.84323	0.00412616
SMAC_00105.3_t1	457.35	-0.743949	0.00862694	-0.499277	0.075261	-0.844641	0.000206301	1.8394	4.84706e-18	0.927533	6.2695e-05	0.126003	0.744343	-0.911862	0.000109896	-1.71339	1.28291e-14
SMAC_00106.3_t1	722.123	-0.133369	0.74891	0.248087	0.378681	0.297086	0.194505	0.280709	0.301117	-0.00119708	0.99795	-0.0741617	0.851175	-0.281906	0.374896	-0.354871	0.227116
SMAC_00107.3_t1	394.463	-0.163651	0.744522	-0.0286227	0.943188	-0.216983	0.458033	0.304133	0.361252	-0.0188406	0.967647	0.241694	0.541227	-0.322974	0.406402	-0.0624385	0.901488
SMAC_00108.3_t1	691.904	-0.679643	0.0989355	-0.486781	0.1898	3.01317	2.55623e-28	0.148364	0.734995	0.071479	0.889379	0.291485	0.503945	-0.0768854	0.893027	0.14312	0.780614
SMAC_00109.3_t1	10462.7	-0.149869	0.723761	0.489815	0.073954	1.31209	1.47657e-09	-0.379604	0.156585	-0.847226	0.000421083	-0.525597	0.0505632	-0.467622	0.105309	-0.145993	0.693687
SMAC_00110.3_t1	438.656	-0.690258	0.164443	-0.999934	0.016569	-0.868516	0.0130926	0.624324	0.121174	0.471602	0.294606	0.180848	0.759295	-0.152723	0.806985	-0.443476	0.366345
SMAC_00111.3_t1	809.631	-0.310266	0.60411	-0.804429	0.0544235	1.3887	2.915e-05	1.52561	1.21798e-05	0.342551	0.466177	0.0794456	0.902901	-1.18305	0.00203086	-1.44616	7.03537e-05
SMAC_00112.3_t1	337.151	-0.333495	0.556373	-0.360411	0.410442	-0.240018	0.521296	0.519584	0.190823	0.0545144	0.924009	0.910183	0.0163895	-0.46507	0.325126	0.390599	0.413224
SMAC_00113.3_t1	7212.35	-0.735162	0.27501	-1.19073	0.0266034	-1.31814	0.00308181	1.15157	0.0199909	1.14831	0.0249427	1.48568	0.00239325	-0.0032628	0.997155	0.33411	0.634219
SMAC_00114.3_t1	6235.67	0.102862	0.813626	0.355582	0.19034	0.19062	0.429634	1.12823	3.27432e-07	0.140573	0.672052	0.0493324	0.90665	-0.987657	2.20343e-05	-1.0789	1.96756e-06
SMAC_00115.3_t1	1648.13	-0.258911	0.468842	-0.282117	0.312837	-0.354121	0.118586	0.426647	0.0913648	-0.586664	0.0182768	-0.581087	0.0226027	-1.01331	1.26721e-05	-1.00773	1.29924e-05
SMAC_00116.3_t1	2096.46	-0.285789	0.590276	-0.583214	0.12226	-1.21479	5.72293e-05	0.0209438	0.964617	0.156809	0.748605	0.495308	0.21568	0.135865	0.80844	0.474364	0.249096
SMAC_00117.3_t1	186.935	0.0101292	0.989641	-0.518728	0.254947	0.169959	0.675904	1.16094	0.00163516	1.12531	0.0028884	0.0715969	0.918601	-0.0356249	0.959493	-1.08934	0.00713353
SMAC_00118.3_t1	2017.82	0.793492	0.0596599	0.387605	0.338642	-0.459538	0.167729	0.401369	0.312948	0.583324	0.135876	0.0799083	0.891851	0.181954	0.745094	-0.321461	0.50022
SMAC_00120.3_t1	833.357	0.231837	0.734221	0.973171	0.0239895	-0.215663	0.600301	-0.131931	0.814389	0.0730181	0.907648	0.201475	0.740244	0.204949	0.747976	0.333406	0.546279
SMAC_00121.3_t1	641.396	0.0735014	0.86304	0.117817	0.688624	0.11754	0.617298	-0.835183	0.000120355	-0.639162	0.00529336	-0.304204	0.27958	0.196021	0.565299	0.530979	0.0366539
SMAC_00122.3_t1	376.009	0.191292	0.754511	0.333216	0.425774	0.976873	0.00187347	0.539485	0.15196	0.24511	0.599301	0.242266	0.629146	-0.294375	0.565693	-0.297219	0.544947
SMAC_00123.3_t1	476.36	0.274638	0.467097	-0.0260667	0.941008	-0.623563	0.00795574	0.369861	0.179436	0.191159	0.563131	-0.189657	0.601516	-0.178701	0.64706	-0.559518	0.0491753
SMAC_00124.3_t1	589.371	0.273261	0.555003	-0.0159456	0.967623	-0.546379	0.0521362	-0.16858	0.66944	-0.10807	0.811641	0.174014	0.696834	0.0605103	0.912698	0.342594	0.38467
SMAC_00125.3_t1	39.1248	-0.474598	0.632947	0.071647	0.931905	-0.62545	0.298785	-0.519716	0.481532	-0.463307	0.557359	0.224278	0.818959	0.0564097	0.961197	0.743994	0.357683
SMAC_00126.3_t1	1548.92	0.375643	0.133746	0.671236	0.00105853	-0.0865216	0.676642	-0.245674	0.268637	-0.0789446	0.788076	0.0587772	0.85659	0.166729	0.566268	0.304451	0.20163
SMAC_00127.3_t1	69882.6	-0.0876211	0.936332	-0.411683	0.526277	-14.2672	2.2326e-117	-1.49533	0.00447496	-0.555119	0.403453	-1.04439	0.0788609	0.940206	0.139747	0.450939	0.543135
SMAC_00128.3_t1	725.958	-0.378672	0.553257	-0.309101	0.540536	0.109411	0.809176	0.196796	0.724639	0.231825	0.687217	0.199326	0.756123	0.0350291	0.962889	0.00253041	0.99688
SMAC_00129.3_t1	965.819	0.176155	0.805429	0.623542	0.162133	0.963448	0.00743988	-0.0809183	0.892445	0.00170172	0.998324	0.0493253	0.943317	0.08262	0.909023	0.130244	0.839441
SMAC_00130.3_t1	1233.55	2.54266	6.29259e-06	1.21894	0.0525489	-0.254496	0.672371	-0.561664	0.40571	1.22724	0.0429416	0.0389288	0.968333	1.7889	0.00239923	0.600593	0.427859
SMAC_00131.3_t1	3915.05	0.25533	0.508689	0.124479	0.707291	1.50024	1.42902e-11	-0.321274	0.262671	-0.385385	0.188371	-0.210449	0.546167	-0.0641111	0.886593	0.110825	0.78377
SMAC_00132.3_t1	2125.6	-0.19772	0.714956	0.0540588	0.902269	-0.59895	0.0412531	0.0335606	0.94342	0.0408082	0.93379	0.0299374	0.957236	0.00724766	0.989018	-0.00362315	0.994334
SMAC_00133.3_t1	561.41	1.09479	0.000234622	0.477635	0.144665	1.3671	7.65696e-08	-0.000457959	0.99901	0.153843	0.70972	-0.757357	0.0166205	0.154301	0.741949	-0.756899	0.0189698
SMAC_00134.3_t1	5954.91	0.107867	0.766694	0.106118	0.693459	0.0858627	0.695363	-0.417796	0.0522974	-0.477248	0.0287739	-0.285451	0.256964	-0.0594519	0.869626	0.132345	0.664763
SMAC_00135.3_t1	186.764	-0.74696	0.331586	-1.58823	0.00792628	-1.09969	0.0295884	0.0559345	0.945253	-0.237341	0.764903	0.169523	0.84887	-0.293276	0.73623	0.113589	0.904045
SMAC_00136.3_t1	3296.26	-0.02279	0.972699	-0.868656	0.0240569	-1.44424	4.10702e-06	0.676928	0.0654194	0.659913	0.0873561	0.794698	0.0342907	-0.0170151	0.979091	0.11777	0.835041
SMAC_00137.3_t1	954.581	-0.0592719	0.891768	0.377047	0.135831	0.621054	0.00224055	-0.103407	0.736177	-0.28419	0.291745	0.0118371	0.97588	-0.180783	0.594672	0.115244	0.741283
SMAC_00138.3_t1	376.413	0.927235	0.00141219	0.0789393	0.833071	1.18417	8.6222e-07	0.485902	0.0938827	0.650246	0.0221288	-0.039407	0.937162	0.164345	0.703475	-0.525309	0.105711
SMAC_00139.3_t1	510.88	0.733638	0.0574538	0.0274646	0.951421	-1.53856	1.58597e-07	0.564269	0.0945691	1.33815	7.82102e-06	0.399843	0.317578	0.773883	0.0256984	-0.164426	0.736934
SMAC_00140.3_t1	824.672	1.51857	0.0123031	0.169342	0.816935	-1.14165	0.0235946	0.157804	0.841337	2.93307	2.73529e-09	0.396887	0.601612	2.77526	3.74772e-08	0.239082	0.779795
SMAC_00141.3_t1	1168.18	1.07339	0.129244	0.661835	0.305503	-2.99738	1.86042e-09	-0.482654	0.473277	1.98938	0.000203749	-0.171583	0.850814	2.47204	3.47541e-06	0.311071	0.711929
SMAC_00142.3_t1	285.514	-0.340773	0.542265	-0.325055	0.45633	-1.18557	0.000340078	0.0432138	0.936924	0.431685	0.315922	0.140248	0.807989	0.388471	0.429924	0.0970345	0.873452
SMAC_00143.3_t1	348.314	-0.294612	0.521356	0.0353397	0.932172	0.857765	0.00130619	0.196573	0.606642	-0.460957	0.180447	-0.31724	0.424057	-0.657531	0.0524232	-0.513813	0.152656
SMAC_00144.3_t1	304.818	0.362376	0.317415	0.428849	0.139489	1.16083	1.8519e-07	1.12704	1.36288e-06	-0.0245918	0.953466	0.175513	0.644935	-1.15163	2.23232e-06	-0.951523	0.000212199
SMAC_00145.3_t1	148.128	0.106701	0.880921	0.70221	0.0864823	1.98461	2.65357e-10	0.424557	0.312437	-0.277848	0.57521	-0.134305	0.831826	-0.702405	0.109979	-0.558862	0.239682
SMAC_00146.3_t1	607.278	-0.0964915	0.865458	-0.293981	0.415743	0.26411	0.377783	-0.192298	0.62064	-0.125071	0.780143	-0.0181409	0.972318	0.0672269	0.901203	0.174157	0.705162
SMAC_00147.3_t1	69.7952	-0.691898	0.368609	0.373028	0.555636	1.58778	0.000428294	0.40166	0.523595	-0.992935	0.0920377	-0.393023	0.608619	-1.39459	0.0161393	-0.794683	0.231011
SMAC_00148.3_t1	1349.31	0.064329	0.896486	0.386017	0.179368	0.229009	0.364889	0.38928	0.157884	0.246303	0.438435	0.383488	0.205031	-0.142977	0.726357	-0.00579226	0.988865
SMAC_00149.3_t1	674.421	-0.0703732	0.884832	0.237789	0.432464	0.276626	0.258088	1.01189	1.40651e-05	1.41687	3.05952e-10	1.79712	4.32713e-16	0.404978	0.174898	0.785224	0.0015634
SMAC_00150.3_t1	1915.47	-0.294856	0.625494	-0.95055	0.0208376	-0.45876	0.20554	0.316289	0.488985	0.456495	0.311209	0.449765	0.338815	0.140206	0.823082	0.133476	0.825267
SMAC_00151.3_t1	487.516	-0.282074	0.524778	-0.243873	0.487643	0.477128	0.0764778	-0.729075	0.0124752	-0.432648	0.194621	0.128962	0.777841	0.296426	0.472041	0.858036	0.0045768
SMAC_00152.3_t1	735.484	0.0296027	0.954058	0.181388	0.558089	1.18952	6.49911e-08	0.107974	0.755485	-0.0800755	0.836063	0.23049	0.49697	-0.188049	0.624662	0.122516	0.753608
SMAC_00153.3_t1	2080.19	0.0562825	0.95282	1.12953	0.0239308	-0.524213	0.238136	0.391707	0.48065	-0.0183888	0.980189	0.163868	0.82457	-0.410096	0.537486	-0.227839	0.744519
SMAC_00154.3_t1	1659.39	-0.144271	0.808719	-0.633516	0.0836785	-0.0188568	0.95877	-0.165786	0.707044	-0.195561	0.666952	-0.0532161	0.927325	-0.029775	0.961197	0.11257	0.832709
SMAC_00155.3_t1	76.8801	1.11592	0.092083	0.546306	0.391355	-0.795649	0.136413	0.000416082	0.999369	1.08145	0.0569147	1.23167	0.0306345	1.08104	0.0782253	1.23125	0.0361256
SMAC_00156.3_t1	511.686	0.122719	0.835019	-0.134374	0.75364	-0.278223	0.384868	0.769036	0.016204	0.438965	0.239692	0.377429	0.350032	-0.330071	0.45475	-0.391607	0.338994
SMAC_00157.3_t1	217.713	0.662764	0.400372	0.194887	0.791243	0.643221	0.219069	0.215423	0.776965	0.22218	0.783733	0.344113	0.664138	0.00675647	0.994887	0.12869	0.891012
SMAC_00158.3_t1	3627.47	-2.05669	1.80975e-08	-3.36877	1.99317e-22	-7.82545	3.11937e-115	-6.09162	7.56933e-75	-5.90363	1.75613e-70	-7.35018	1.41323e-98	0.187997	0.770077	-1.25856	0.00276907
SMAC_00159.3_t1	778.862	0.128963	0.806662	0.346999	0.304831	-0.46818	0.0880112	-0.331261	0.322058	-0.790223	0.00779248	-0.643938	0.0431574	-0.458963	0.205096	-0.312678	0.425431
SMAC_00160.3_t1	2329.22	0.362799	0.242688	0.365707	0.15762	-0.0426147	0.86754	-0.521543	0.025672	0.0701704	0.843842	0.183458	0.561	0.591713	0.0174937	0.705001	0.0025871
SMAC_00161.3_t1	816.209	0.527767	0.149498	0.332863	0.315877	-0.344933	0.211523	-0.358474	0.265829	0.303345	0.387805	0.277708	0.46292	0.661819	0.036874	0.636182	0.0426937
SMAC_00162.3_t1	1003.24	0.659785	0.221366	0.262721	0.602374	0.897069	0.0150874	-0.0190609	0.973317	0.259837	0.636032	-0.0838706	0.905409	0.278898	0.654164	-0.0648097	0.929554
SMAC_00163.3_t1	2629.89	0.328145	0.470783	0.436167	0.20871	-2.60964	1.3975e-22	-1.215	2.48399e-05	-0.506702	0.142053	-0.406375	0.277042	0.708302	0.0373729	0.80863	0.0119748
SMAC_00164.3_t1	738.635	0.247823	0.664581	0.177296	0.692928	2.48112	4.84048e-17	0.293241	0.482495	0.34979	0.412986	-0.0485407	0.937114	0.0565488	0.928554	-0.341782	0.467047
SMAC_00165.3_t1	1362.49	-0.21483	0.683452	0.211994	0.586492	0.317228	0.30117	0.483621	0.152941	0.25849	0.520807	0.273979	0.51647	-0.225132	0.638716	-0.209643	0.643905
SMAC_00166.3_t1	114.957	-1.33911	0.00694711	-1.26553	0.00896336	0.526428	0.196449	-0.667555	0.154212	-0.712286	0.144306	-0.212561	0.753532	-0.044731	0.956666	0.454994	0.444007
SMAC_00167.3_t1	3930.46	0.207037	0.740333	0.291226	0.505192	-0.483368	0.16119	0.755276	0.042058	0.617297	0.12685	0.432526	0.338116	-0.137979	0.818472	-0.32275	0.515571
SMAC_00168.3_t1	174.568	-0.0871203	0.887085	-0.0233035	0.957652	-1.10913	0.00020718	0.636894	0.0472969	0.552281	0.109618	0.455539	0.234063	-0.084613	0.876639	-0.181355	0.705661
SMAC_00169.3_t1	1696.63	-0.621675	0.22789	-0.870753	0.0384836	-1.62362	1.89644e-06	-1.20917	0.00111919	-0.670544	0.116605	-0.809906	0.0524836	0.538627	0.268026	0.399265	0.433614
SMAC_00170.3_t1	206.574	0.290529	0.609342	-0.526025	0.202566	-1.35854	4.03736e-05	0.19198	0.683539	-0.231528	0.634641	-0.307815	0.536097	-0.423508	0.374881	-0.499795	0.271707
SMAC_00172.3_t1	1651.16	0.286434	0.50764	-0.538603	0.0909384	-2.01668	1.44266e-15	0.822994	0.00306936	1.26128	2.02807e-06	0.905194	0.00130226	0.438285	0.209844	0.0822007	0.860419
SMAC_00173.3_t1	772.851	1.12005	0.00249352	-0.00693398	0.987967	-3.37102	1.76511e-23	1.47191	4.20087e-06	2.14785	3.67483e-12	0.708126	0.0624974	0.675938	0.0850702	-0.763785	0.0418502
SMAC_00174.3_t1	609.902	-0.361475	0.35824	-0.467898	0.133296	1.00785	3.28426e-05	0.460678	0.113412	0.00458603	0.991679	-0.0299796	0.950344	-0.456092	0.168338	-0.490657	0.12633
SMAC_00176.3_t1	2930.69	-9.71419e-05	0.999625	0.257694	0.373591	-0.778009	0.000465964	-0.250001	0.387619	-0.634638	0.0121729	-0.364974	0.214469	-0.384638	0.20716	-0.114973	0.7636
SMAC_00177.3_t1	64.9409	-0.562723	0.558658	-0.989693	0.165564	-2.2726	0.000140938	-0.390328	0.62173	0.244633	0.788012	0.39008	0.661501	0.634961	0.459233	0.780408	0.323183
SMAC_00178.3_t1	465.664	0.122275	0.795456	0.0320862	0.929951	0.109899	0.69027	0.384678	0.174216	0.0744445	0.856656	0.550805	0.0540805	-0.310234	0.370553	0.166127	0.666796
SMAC_00179.3_t1	4326.39	-0.367197	0.137801	-0.642695	0.00163352	-2.66379	5.75697e-56	0.551296	0.00356962	0.990425	2.21304e-08	0.716463	0.000114061	0.439129	0.0403082	0.165167	0.535581
SMAC_00180.3_t1	2262.69	1.56434	2.51669e-06	1.83094	1.78874e-08	0.0125705	0.97443	-0.413419	0.284051	1.62891	2.00021e-07	2.20111	4.25971e-13	2.04233	5.32941e-11	2.61453	3.6889e-18
SMAC_00181.3_t1	1940.4	-0.629569	0.0560393	-0.306244	0.333536	-1.17388	1.31026e-06	1.36416	2.94176e-08	1.77639	1.98983e-13	1.78078	1.65455e-13	0.412235	0.213223	0.416626	0.192331
SMAC_00182.3_t1	925.124	-0.278712	0.602358	-0.816279	0.0275751	-1.17073	0.000114141	0.401912	0.291917	0.105352	0.838991	0.334223	0.449032	-0.296559	0.543622	-0.0676883	0.907307
SMAC_00183.3_t1	829.079	0.41146	0.356488	0.606419	0.0818742	0.767436	0.00728106	0.741968	0.0189838	0.148524	0.744668	0.268492	0.530991	-0.593444	0.104844	-0.473476	0.211849
SMAC_00184.3_t1	382.058	0.00350122	0.996406	-0.332155	0.437796	0.948023	0.0029365	0.471431	0.228707	0.128363	0.809751	0.075962	0.901896	-0.343068	0.4946	-0.395469	0.397407
SMAC_00185.3_t1	3391.91	-0.0343623	0.957584	-0.472017	0.193943	-0.849395	0.0035553	0.569442	0.092329	0.974974	0.00208735	0.705408	0.0403057	0.405531	0.330548	0.135965	0.787685
SMAC_00186.3_t1	9144.1	0.767083	0.122424	0.555726	0.210941	-0.278717	0.483427	-1.47558	6.73057e-05	-1.05094	0.00834321	-1.16585	0.0029998	0.42464	0.428922	0.309727	0.573719
SMAC_00187.3_t1	1791.89	-0.181267	0.734221	-0.495759	0.155552	0.986515	0.000367317	-1.37628	1.78615e-06	-1.26783	1.6097e-05	-0.514448	0.150058	0.108445	0.837198	0.861829	0.0075981
SMAC_00188.3_t1	692.278	0.7262	0.116956	0.0922261	0.852948	2.40668	2.45777e-14	0.722807	0.0567062	0.835722	0.0291223	-0.331736	0.508194	0.112915	0.857252	-1.05454	0.0059912
SMAC_00189.3_t1	349.333	-0.315467	0.676591	-1.37915	0.00544276	-0.77934	0.0666525	1.58062	0.000195904	1.09523	0.0177678	0.853826	0.0886966	-0.485389	0.423398	-0.726793	0.166034
SMAC_00190.3_t1	551.492	0.293553	0.629305	-1.0176	0.0145395	0.981163	0.00402448	-0.831287	0.0325126	1.20226	0.00107755	0.223914	0.687136	2.03355	7.56664e-09	1.0552	0.00782033
SMAC_00191.3_t1	1009.1	0.0593321	0.880516	0.32184	0.169155	0.053884	0.813218	-0.397175	0.0685005	-0.0365247	0.912133	0.400412	0.0848939	0.36065	0.149785	0.797587	9.51105e-05
SMAC_00192.3_t1	1034.27	-0.530102	0.264149	-0.814107	0.0330493	-0.940804	0.00290444	0.32109	0.436622	0.29343	0.508363	-0.106501	0.851175	-0.0276608	0.96458	-0.427592	0.333605
SMAC_00193.3_t1	2072.52	0.32043	0.587335	0.548747	0.196571	2.21726	1.19846e-11	-0.880886	0.0204705	-1.21655	0.00097736	-1.25147	0.000779467	-0.335661	0.540198	-0.370582	0.468478
SMAC_00194.3_t1	1567.05	-0.314127	0.631122	-0.660068	0.148434	-1.05926	0.00415901	0.49346	0.282145	0.315198	0.549867	0.300609	0.594855	-0.178262	0.789106	-0.192851	0.756702
SMAC_00195.3_t1	423.191	0.31125	0.469389	-0.165131	0.658083	-0.752034	0.00492239	0.399857	0.207253	0.675024	0.0238484	0.0407523	0.937159	0.275167	0.501141	-0.359104	0.336787
SMAC_00196.3_t1	1264.88	0.642462	0.0325162	0.881747	0.00098549	0.185258	0.477849	-0.482149	0.0752187	0.0612968	0.880201	-0.103332	0.801972	0.543445	0.0640816	0.378816	0.230712
SMAC_00198.3_t1	301.857	0.0168706	0.976514	0.0912426	0.828816	0.437094	0.136028	-0.523563	0.118568	-0.301098	0.439395	0.815597	0.0108325	0.222465	0.649759	1.33916	8.86952e-06
SMAC_00199.3_t1	399.75	-0.41504	0.425318	-0.251785	0.564324	0.744869	0.0211082	0.393146	0.330814	-0.570563	0.155319	-0.623975	0.129403	-0.963709	0.0109472	-1.01712	0.00623257
SMAC_00200.3_t1	570.05	-0.129551	0.739875	0.210851	0.430932	0.464687	0.0227483	0.590849	0.00687452	0.238462	0.382267	0.224334	0.449088	-0.352388	0.193924	-0.366515	0.166858
SMAC_00201.3_t1	266.842	-0.323719	0.54982	0.394705	0.324722	1.50264	4.61917e-07	1.68727	4.13765e-08	0.228049	0.622255	0.0257135	0.966394	-1.45922	6.9864e-06	-1.66156	3.66837e-07
SMAC_00202.3_t1	573.533	-0.206886	0.632947	0.218221	0.498396	0.646431	0.0074759	0.536125	0.0506093	-0.29243	0.372546	-0.424591	0.184894	-0.828555	0.00270658	-0.960716	0.000341231
SMAC_00203.3_t1	633.579	-0.123856	0.889725	0.363328	0.520379	1.65289	6.54088e-05	0.711402	0.157307	0.117669	0.87301	-0.0490346	0.95146	-0.593733	0.326131	-0.760436	0.16595
SMAC_00204.3_t1	51.5453	-0.31873	0.775673	-0.260667	0.757162	0.558178	0.360446	1.07341	0.0963822	-0.498734	0.540698	-0.51792	0.56663	-1.57214	0.0205094	-1.59133	0.0216502
SMAC_00205.3_t1	603.794	-0.896604	0.0704215	-1.18041	0.00663742	-1.29968	0.000353228	-0.721873	0.090072	-0.596275	0.199447	0.0550986	0.937942	0.125598	0.857162	0.776971	0.0894147
SMAC_00206.3_t1	1032.39	-0.212482	0.667473	-0.326927	0.348205	-0.639097	0.0200928	-0.719066	0.0166813	-0.44936	0.189773	-0.0223121	0.965733	0.269705	0.534408	0.696753	0.0311094
SMAC_00207.3_t1	454.367	-0.613531	0.4016	-1.36934	0.0126536	-1.37288	0.00274476	-0.183892	0.794917	-0.14863	0.850089	0.034905	0.968139	0.0352623	0.969573	0.218797	0.783204
SMAC_00208.3_t1	1494.54	0.255217	0.753903	1.06639	0.0372946	0.14762	0.769939	0.430487	0.440253	-0.0218076	0.976451	0.142477	0.852122	-0.452294	0.496767	-0.28801	0.677148
SMAC_00209.3_t1	301.153	0.334847	0.456468	0.50966	0.132604	0.166219	0.596489	0.806562	0.00628015	0.53247	0.109239	0.761106	0.0161453	-0.274091	0.523201	-0.0454551	0.934012
SMAC_00210.3_t1	796.999	0.0331308	0.955369	-0.474735	0.150443	1.22903	1.47086e-06	0.754883	0.00844729	1.00304	0.000322996	-0.194092	0.645457	0.248152	0.554267	-0.948975	0.0012466
SMAC_00211.3_t1	14565.8	0.763912	0.00694505	0.255851	0.39983	-0.372295	0.124888	-1.45014	4.09091e-10	-1.38854	3.16633e-09	-1.40343	2.20316e-09	0.0615998	0.891948	0.0467057	0.918056
SMAC_00212.3_t1	1513.17	1.18357	0.0137167	0.847783	0.0729843	0.313176	0.469199	-0.686885	0.13456	-0.0106626	0.987097	-0.234893	0.71357	0.676222	0.197906	0.451992	0.425431
SMAC_00213.3_t1	2587.46	0.124392	0.864658	-0.728709	0.0909507	-3.95767	3.50874e-30	1.0306	0.00700709	2.15807	8.09484e-10	1.2264	0.00132292	1.12747	0.005181	0.195798	0.738111
SMAC_00214.3_t1	3158.43	0.0137175	0.975635	0.308959	0.267335	-0.0084037	0.97583	0.214409	0.460482	0.721277	0.00269503	0.833858	0.000404698	0.506868	0.0647541	0.619449	0.0149232
SMAC_00215.3_t1	1451.25	0.0166575	0.979297	-0.339435	0.418607	-0.243589	0.496873	0.384084	0.344083	0.696448	0.0671402	0.643877	0.103675	0.312364	0.539243	0.259793	0.602037
SMAC_00215.3_t2	0	NA	NA	NA	NA	NA	NA	NA	NA	NA	NA	NA	NA	NA	NA	NA	NA
SMAC_00216.3_t1	440.44	-0.309931	0.512271	-0.742048	0.0313856	-1.43311	3.69304e-07	0.492504	0.134211	1.11447	0.000143938	0.709364	0.0306386	0.621965	0.0742632	0.21686	0.620717
SMAC_00217.3_t1	468.753	-0.138312	0.788467	0.239367	0.491272	-0.604211	0.0238157	-0.383783	0.23234	-0.217399	0.563251	0.13517	0.76519	0.166383	0.720105	0.518953	0.124207
SMAC_00217.3_t2	0	NA	NA	NA	NA	NA	NA	NA	NA	NA	NA	NA	NA	NA	NA	NA	NA
SMAC_00218.3_t1	187.712	0.253486	0.790312	-0.574022	0.364354	0.36744	0.497425	-0.267186	0.708791	-0.146347	0.86188	-0.505233	0.482232	0.120839	0.899342	-0.238047	0.781654
SMAC_00219.3_t1	496.325	-0.11882	0.855475	-0.581391	0.143156	-0.308936	0.37625	0.0953503	0.851254	-0.00246377	0.996832	-0.381092	0.401067	-0.097814	0.873223	-0.476443	0.280148
SMAC_00220.3_t1	1333.27	0.810331	0.103136	0.851857	0.0512052	-3.02214	8.16041e-18	-1.94183	1.25008e-07	-0.229287	0.678205	-0.216925	0.715928	1.71254	9.17603e-06	1.72491	6.1826e-06
SMAC_00221.3_t1	287.045	2.81465	2.43942e-15	0.297741	0.553712	3.54111	1.42941e-26	0.550016	0.215733	2.79912	5.13446e-16	0.521119	0.310874	2.2491	2.63018e-10	-0.0288968	0.969019
SMAC_00221.3_t2	0	NA	NA	NA	NA	NA	NA	NA	NA	NA	NA	NA	NA	NA	NA	NA	NA
SMAC_00222.3_t1	512.565	-0.937423	0.0192477	-0.542217	0.169319	-0.772408	0.016115	-1.86845	6.21014e-09	-1.50434	5.33695e-06	-1.37821	4.91912e-05	0.364109	0.465695	0.490239	0.272174
SMAC_00223.3_t1	908.308	-1.35854	0.0086182	-1.77057	0.000217928	1.23078	0.00340793	-1.78208	5.03926e-05	-2.29729	1.03624e-07	-2.51934	6.28787e-09	-0.515207	0.422045	-0.737257	0.193258
SMAC_00224.3_t1	9.75199	0.623018	0.696222	0.532845	0.662497	-0.930206	0.375779	1.00766	0.338606	0.139257	0.925731	0.669284	0.627081	-0.868398	0.514105	-0.338372	0.825635
SMAC_00225.3_t1	9216.21	0.652455	0.407079	0.771657	0.208926	-4.39693	6.8881e-21	-2.96689	1.57235e-09	-2.44903	1.30106e-06	-3.34348	8.8463e-12	0.517867	0.503346	-0.376583	0.627067
SMAC_00226.3_t1	944.341	0.00700699	0.994596	-1.05127	0.0577173	-1.97797	1.02531e-05	1.11316	0.0282822	0.725626	0.207458	0.283745	0.701475	-0.387537	0.604561	-0.829418	0.154841
SMAC_00227.3_t1	421.941	0.0543113	0.918156	-0.00520289	0.988078	0.410025	0.0998086	-0.632436	0.0197202	-0.377582	0.224321	-0.164647	0.676307	0.254854	0.512779	0.467789	0.146115
SMAC_00228.3_t1	801.11	0.131489	0.825258	0.398323	0.288986	0.344143	0.277571	0.510071	0.144312	0.448687	0.236581	-0.0494402	0.930938	-0.061384	0.918205	-0.559511	0.142373
SMAC_00229.3_t1	8729.09	0.346903	0.589225	0.636534	0.166665	0.2823	0.497248	-0.664037	0.129202	-1.35947	0.000641659	-1.58277	5.14759e-05	-0.695433	0.156288	-0.918733	0.0379661
SMAC_00230.3_t1	533.572	0.0411875	0.953764	-0.111191	0.812437	0.931666	0.00288793	-0.0662743	0.899034	0.0661322	0.90483	0.224948	0.65401	0.132407	0.81901	0.291222	0.550113
SMAC_00231.3_t1	470.796	-0.683901	0.116012	-0.802845	0.0333095	-1.38358	6.59049e-06	-2.4779	1.84393e-15	-2.72131	2.74416e-18	-1.9189	2.67213e-09	-0.243415	0.66219	0.558998	0.19417
SMAC_00232.3_t1	2374.12	-0.793114	0.0492762	-0.525478	0.165564	-0.434024	0.177155	-1.89497	5.19247e-10	-1.79078	6.50328e-09	-1.71274	3.7107e-08	0.104189	0.858227	0.182226	0.72133
SMAC_00233.3_t1	351.671	-0.278228	0.594076	0.099443	0.822949	0.717815	0.0167648	-0.644728	0.0621041	-0.934448	0.00525929	-1.10162	0.00113145	-0.28972	0.556021	-0.456893	0.291936
SMAC_00234.3_t1	5489.88	-1.59125	0.00272614	-0.961384	0.0783361	-1.44066	0.00120598	-4.44653	9.28247e-25	-3.9498	1.77448e-19	-3.44151	5.72478e-15	0.496738	0.475549	1.00502	0.0687702
SMAC_00235.3_t1	725.893	-0.141293	0.707152	0.027891	0.927132	0.777534	6.16606e-05	0.125966	0.65864	-0.221056	0.418102	-0.19275	0.522585	-0.347022	0.199896	-0.318716	0.243903
SMAC_00236.3_t1	3247.99	0.878164	0.00260174	0.706585	0.0162984	1.24489	1.97848e-07	0.37909	0.204819	-0.0250247	0.954622	-0.170407	0.666049	-0.404114	0.231918	-0.549497	0.0706368
SMAC_00237.3_t1	1.575	1.63623	NA	1.48321	NA	0.744886	0.787044	-0.379593	0.928814	2.31391	0.424237	2.11939	NA	2.6935	NA	2.49899	0.493539
SMAC_00238.3_t1	748.251	-0.241572	0.831111	-0.982147	0.159946	-1.17456	0.0409566	0.07202	0.938223	0.504596	0.525611	0.579876	0.478545	0.432576	0.649365	0.507856	0.554077
SMAC_00239.3_t1	1005.67	-0.618032	0.0898042	-0.276199	0.425391	3.58415	1.15146e-50	1.25291	1.79779e-06	0.324257	0.350296	0.340982	0.346431	-0.928652	0.00134217	-0.911927	0.00157541
SMAC_00240.3_t1	385.934	-0.646317	0.122924	-1.17242	0.000835637	1.32489	3.15663e-06	1.11138	0.000283245	-0.152338	0.746227	-0.579888	0.128518	-1.26371	6.61176e-05	-1.69126	4.60074e-08
SMAC_00241.3_t1	1140.71	-0.146303	0.826765	0.529454	0.200454	0.137345	0.721585	-0.598069	0.126829	-0.42616	0.335389	0.14007	0.809736	0.17191	0.77378	0.738139	0.0715258
SMAC_00242.3_t1	730.071	0.365479	0.524086	0.955334	0.019435	-0.0342209	0.934487	0.321593	0.480166	-0.156272	0.780143	-0.282356	0.593253	-0.477865	0.330548	-0.603949	0.178448
SMAC_00243.3_t1	305.678	-0.323666	0.691758	0.745693	0.170097	-0.728197	0.113027	-1.01299	0.0438945	-0.434785	0.477408	0.961944	0.0708435	0.578202	0.374881	1.97493	2.59595e-05
SMAC_00244.3_t1	1522.95	0.151982	0.760417	0.236342	0.492757	0.459763	0.0844622	1.25864	1.646e-06	1.68001	5.35968e-11	1.78651	2.513e-12	0.42137	0.229762	0.527872	0.0997214
SMAC_00245.3_t1	245.114	0.147051	0.772037	0.559979	0.077043	1.81515	5.26426e-14	0.21046	0.553799	-0.332427	0.344602	-0.102556	0.832617	-0.542887	0.111812	-0.313016	0.432918
SMAC_00246.3_t1	2970.03	0.125947	0.85363	0.815369	0.0445705	0.888315	0.0083581	-0.0838149	0.878287	-0.332476	0.476419	-0.506357	0.258246	-0.248661	0.663996	-0.422542	0.377992
SMAC_00247.3_t1	404.49	-0.0322016	0.957882	-0.604955	0.0749879	0.184174	0.552807	-0.609848	0.0530061	-0.298718	0.428187	0.228273	0.589084	0.31113	0.467329	0.838121	0.0087425
SMAC_00248.3_t1	12626.7	-0.23579	0.743023	0.46542	0.335578	0.680836	0.0801693	0.810086	0.0613235	-0.270718	0.631961	-0.3318	0.560155	-1.0808	0.0158327	-1.14189	0.00782033
SMAC_00249.3_t1	128.545	1.54557	0.0097499	0.066363	0.930473	0.439299	0.41965	0.264788	0.717044	0.0751062	0.929092	-0.823723	0.226863	-0.189682	0.837198	-1.08851	0.0934679
SMAC_00250.3_t1	1453.09	-1.6004	0.197375	-2.83082	0.00475695	0.910205	0.324142	-5.43971	2.1752e-10	-5.07324	4.44627e-09	-5.81028	2.37585e-11	0.366473	0.818341	-0.370566	0.810994
SMAC_00251.3_t1	935.808	-0.324871	0.593617	0.168033	0.740989	1.83567	5.50375e-08	-0.0974242	0.862845	-0.50479	0.268496	-0.12057	0.848913	-0.407365	0.445813	-0.0231455	0.973688
SMAC_00252.3_t1	614.334	-0.367755	0.758237	0.781504	0.325224	-1.12364	0.0803162	-0.587783	0.478398	-0.354112	0.716913	-0.00732536	0.994209	0.233671	0.840434	0.580458	0.541021
SMAC_00253.3_t1	2.78667	-0.615592	NA	-0.145223	0.955149	-0.353565	0.865688	0.310531	0.908912	0.303974	0.914823	1.03284	NA	-0.00655687	NA	0.722314	0.802626
SMAC_00254.3_t1	507.253	0.517952	0.137103	0.798686	0.00606328	1.21733	3.24854e-07	0.961115	0.00018325	0.270589	0.424604	0.276669	0.44551	-0.690526	0.018348	-0.684446	0.0190838
SMAC_00255.3_t1	326.781	-0.226198	0.77519	-0.888476	0.0777065	-0.385874	0.388822	0.365211	0.503793	0.35258	0.542044	0.700224	0.181782	-0.0126317	0.987094	0.335013	0.596157
SMAC_00256.3_t1	14556	-0.190211	0.791986	0.422383	0.370696	0.731994	0.0504139	0.816721	0.04943	-0.107512	0.865923	-0.313032	0.573237	-0.924233	0.0380881	-1.12975	0.00639209
SMAC_00257.3_t1	819.019	-0.14202	0.857626	-0.0576671	0.921967	0.405325	0.330517	-0.213812	0.705854	-0.0849988	0.900922	0.0346445	0.962455	0.128813	0.859829	0.248456	0.695965
SMAC_00258.3_t1	688.407	0.0723079	0.912342	0.377254	0.328304	1.29096	1.06222e-05	0.423509	0.253814	-0.0167188	0.974805	-0.141049	0.790685	-0.440227	0.302399	-0.564558	0.148823
SMAC_00259.3_t1	2936.41	-0.0155239	0.967105	-0.0631707	0.810023	-0.0463374	0.830018	-0.054897	0.845817	-0.234852	0.315874	-0.165688	0.531267	-0.179955	0.521215	-0.110791	0.707039
SMAC_00261.3_t1	4157.49	0.463824	0.166431	0.41613	0.151914	1.4597	9.4644e-11	0.142013	0.67588	0.970067	8.41367e-05	1.44888	6.63982e-10	0.828053	0.00174643	1.30686	4.81772e-08
SMAC_00262.3_t1	1670.12	1.45941	2.39739e-05	1.53	8.65402e-06	-10.5927	4.65505e-12	0.648054	0.0742578	1.86278	3.45313e-09	1.82329	8.50093e-09	1.21472	0.000460383	1.17523	0.000574527
SMAC_00263.3_t1	629.92	-0.752091	0.366879	0.633034	0.353046	-5.25085	8.70467e-21	-0.620326	0.361534	-0.0873465	0.924129	0.962071	0.152656	0.53298	0.527726	1.5824	0.00911591
SMAC_00264.3_t1	395.769	-0.87353	0.1315	-0.516211	0.327253	-1.16568	0.00488654	1.53276	0.000326552	0.496841	0.36483	0.089208	0.910941	-1.03592	0.0356836	-1.44356	0.00137719
SMAC_00265.3_t1	5154.25	0.348987	0.372172	0.395763	0.201965	-5.06547	7.95752e-90	0.582543	0.0379221	1.53912	6.04016e-10	1.08732	2.93841e-05	0.956581	0.000503351	0.504775	0.105225
SMAC_00267.3_t1	825.088	-0.446446	0.597001	-0.164224	0.819172	-1.44888	0.00290444	-0.0162108	0.982745	-0.279109	0.713792	-0.399017	0.592349	-0.262898	0.762339	-0.382806	0.615179
SMAC_00268.3_t1	110.554	0.0325009	0.967952	0.0469715	0.936727	-0.31494	0.468725	1.05325	0.0104177	0.770145	0.0903969	0.563964	0.277805	-0.283103	0.654308	-0.489283	0.370607
SMAC_00269.3_t1	1668.86	0.638834	0.121462	0.689133	0.0551211	-2.87231	1.17096e-22	1.03091	0.00102591	1.11441	0.00040733	1.70764	9.89693e-09	0.083498	0.883036	0.676727	0.0585829
SMAC_00270.3_t1	1807.43	-1.03722	0.0642833	-0.539816	0.312837	-4.14285	1.9726e-24	0.780323	0.11032	-0.441036	0.442725	0.152316	0.837884	-1.22136	0.0132942	-0.628007	0.268042
SMAC_00271.3_t1	75.9691	0.26606	0.69128	0.062783	0.910114	-2.69823	7.05359e-10	-0.193835	0.719189	-0.635257	0.169712	0.0230432	0.974212	-0.441422	0.438443	0.216878	0.732803
SMAC_00272.3_t1	1803.86	-0.0793093	0.925415	-0.913241	0.049028	0.329822	0.435852	-1.69876	1.76977e-05	-1.74028	1.31458e-05	-1.71784	1.89064e-05	-0.0415181	0.958205	-0.0190797	0.979791
SMAC_00273.3_t1	4.65725	-3.3389	0.254552	1.21171	0.479512	1.69841	0.196808	0.345402	0.87392	1.612	0.326942	2.2183	0.166606	1.2666	0.526538	1.8729	0.283827
SMAC_00274.3_t1	22.2716	-1.07966	0.403441	-0.705751	0.499843	-6.70632	7.19041e-05	1.86524	0.0188759	-0.0634084	0.962668	0.672281	0.550877	-1.92865	0.0278908	-1.19296	0.218267
SMAC_00275.3_t1	758.347	-0.207904	0.751941	-0.273821	0.553712	-0.505521	0.16119	-0.420235	0.333974	0.0225177	0.969021	0.0425389	0.947904	0.442753	0.378746	0.462774	0.338756
SMAC_00276.3_t1	1852.48	-0.105527	0.786122	0.209987	0.419575	0.347936	0.0892862	-0.28018	0.253641	-0.175652	0.53337	-0.100826	0.769046	0.104528	0.770242	0.179354	0.558408
SMAC_00277.3_t1	400.534	0.122819	0.756326	0.211047	0.436529	0.212282	0.339218	0.179832	0.51472	0.223571	0.422893	0.265542	0.358142	0.0437391	0.916156	0.0857093	0.816623
SMAC_00278.3_t1	580.963	-0.00778661	0.989708	0.537071	0.127812	-0.0647737	0.854046	-0.0275613	0.953355	-0.167402	0.708637	-0.065681	0.90611	-0.13984	0.78825	-0.0381197	0.946558
SMAC_00279.3_t1	1330.34	0.0386963	0.956357	0.405313	0.32462	-0.149824	0.688644	0.301248	0.4822	0.240122	0.613928	-0.0530097	0.931938	-0.0611262	0.924856	-0.354258	0.455207
SMAC_00280.3_t1	1120.4	0.697873	0.0118702	0.29012	0.315142	0.526646	0.0208009	0.0280968	0.939842	-0.0659942	0.866624	-0.59621	0.0256332	-0.094091	0.820294	-0.624307	0.0202799
SMAC_00281.3_t1	3089.57	0.259523	0.450254	0.414882	0.109297	0.158103	0.5052	0.0945115	0.769782	0.105968	0.755247	0.180532	0.575414	0.0114565	0.979091	0.0860204	0.817442
SMAC_00282.3_t1	454.037	-0.806689	0.0513083	0.129278	0.778128	-2.18543	1.55543e-12	-0.512091	0.168285	0.105127	0.841763	0.310496	0.495555	0.617218	0.127071	0.822587	0.0251675
SMAC_00283.3_t1	0.518895	-1.58039	NA	-0.235946	NA	-0.338044	0.943269	-0.491767	0.93921	0.254796	0.968033	0.524493	NA	0.746563	NA	1.01626	0.893457
SMAC_00284.3_t1	347.935	0.2198	0.685132	0.15554	0.711927	0.843568	0.00355335	0.383161	0.291917	0.253894	0.540467	0.452031	0.2456	-0.129267	0.80864	0.0688696	0.902638
SMAC_00285.3_t1	420.671	0.388634	0.524333	0.766222	0.0836785	1.04915	0.00370259	0.446469	0.330919	0.494551	0.299817	0.598253	0.209192	0.0480821	0.947955	0.151784	0.813363
SMAC_00286.3_t1	685.265	-0.182204	0.745862	0.157675	0.707794	0.302716	0.342179	-0.318435	0.40501	-0.356599	0.368762	-0.24635	0.587033	-0.038164	0.949706	0.072085	0.899217
SMAC_00287.3_t1	582.296	0.287978	0.440417	-0.156996	0.627638	1.32309	1.82931e-09	-0.241967	0.422861	-0.626736	0.0179685	-0.178026	0.627362	-0.384769	0.231862	0.0639405	0.885344
SMAC_00288.3_t1	590.32	-0.935051	0.0194171	0.594395	0.11897	-0.715798	0.0251362	2.79978	3.46854e-21	-0.433388	0.29018	-0.338691	0.462621	-3.23317	4.90584e-27	-3.13847	3.78577e-25
SMAC_00289.3_t1	815.089	-0.12341	0.847447	-0.525743	0.180939	-0.480555	0.145962	-0.24193	0.582206	-0.150971	0.767027	-0.0780874	0.894388	0.0909594	0.880679	0.163843	0.760436
SMAC_00290.3_t1	569.35	0.251871	0.728407	0.642324	0.176022	-2.04797	5.51679e-08	-3.50321	1.39026e-19	-3.39387	1.84929e-18	-3.86029	2.105e-21	0.109343	0.891641	-0.357082	0.596681
SMAC_00291.3_t1	695.105	-0.643547	0.117911	-0.00944147	0.982936	-0.840815	0.00443931	2.73515	5.68585e-23	0.313283	0.431078	-1.29728	5.67371e-05	-2.42187	1.04127e-17	-4.03243	2.49081e-44
SMAC_00292.3_t1	191.676	0.0581264	0.987067	-3.92389	0.0752703	5.19863	0.00122093	-0.591984	0.816514	-1.89743	0.400236	-3.62288	0.110924	-1.30544	0.64214	-3.03089	0.211192
SMAC_00293.3_t1	560.469	-0.893214	0.246466	-0.941904	0.140179	1.31441	0.0108597	0.147799	0.858447	-0.394214	0.602853	-0.719429	0.305566	-0.542013	0.501982	-0.867228	0.202833
SMAC_00294.3_t1	1469.4	-0.491335	0.238609	-0.0525249	0.902484	1.17153	1.80158e-05	-0.429309	0.206183	-0.790358	0.0124826	-0.670861	0.0452004	-0.361049	0.381406	-0.241552	0.580859
SMAC_00295.3_t1	332.047	-1.66451	0.00846429	-0.82558	0.19594	-2.22465	1.2983e-05	1.40765	0.0112121	0.611441	0.37122	0.0559396	0.953867	-0.796212	0.254016	-1.35171	0.0232531
SMAC_00296.3_t1	393.83	-0.445487	0.459395	-0.0462687	0.933661	-0.374763	0.349392	0.739266	0.0795955	0.501481	0.295253	0.483741	0.338174	-0.237786	0.707842	-0.255525	0.665936
SMAC_00297.3_t1	157.802	-0.0368458	0.952838	0.556925	0.0888153	-0.21068	0.489604	0.283887	0.413114	-0.330452	0.366473	0.207169	0.631551	-0.61434	0.0735713	-0.076718	0.88176
SMAC_00298.3_t1	108.742	0.0699509	0.940609	0.947018	0.051062	-0.536276	0.230094	1.41709	0.000656356	0.958581	0.0374864	1.69023	5.1777e-05	-0.458508	0.433452	0.273142	0.663229
SMAC_00299.3_t1	25.4652	-2.49395	0.046926	-0.270784	0.818245	-1.57676	0.070506	1.0035	0.291494	0.770828	0.465351	1.06964	0.308486	-0.232667	0.872732	0.0661415	0.964796
SMAC_00300.3_t1	3.74892	-0.833656	NA	-0.750724	0.706011	-0.925866	0.554462	0.36133	0.859509	-0.205933	0.926933	-0.169024	NA	-0.567263	NA	-0.530354	0.829237
SMAC_00301.3_t1	92.2037	-0.674614	0.193956	-0.102067	0.843537	-1.18837	0.000987629	-0.0621116	0.913868	-0.209228	0.693427	-0.0917109	0.888556	-0.147116	0.818341	-0.0295992	0.966878
SMAC_00302.3_t1	684.409	-0.458239	0.228103	-1.6589	1.30669e-09	-3.12036	4.34395e-35	-1.45769	2.0262e-08	-1.48775	1.17365e-08	-2.17414	5.43032e-17	-0.030062	0.95509	-0.716451	0.0226943
SMAC_00303.3_t1	122.847	-0.0273445	0.972036	-0.615448	0.190068	-0.505929	0.197586	0.324784	0.505856	0.767798	0.0743225	-0.427264	0.433926	0.443014	0.408769	-0.752048	0.121112
SMAC_00304.3_t1	165.233	-1.03694	0.0598341	-0.887901	0.0773452	0.557214	0.184634	0.707536	0.131009	-0.846038	0.0837077	0.00863081	0.989813	-1.55357	0.000544232	-0.698905	0.187138
SMAC_00305.3_t1	572.433	0.0306911	0.97229	-0.88115	0.0877125	-1.00406	0.0186411	-0.517712	0.330678	-0.172813	0.805369	-0.219294	0.760688	0.344899	0.624196	0.298417	0.660986
SMAC_00306.3_t1	433.567	-0.411104	0.196454	-0.231116	0.418111	-0.400079	0.0738116	-0.0150323	0.96433	-0.204589	0.499033	-0.0383814	0.927891	-0.189556	0.596402	-0.023349	0.956371
SMAC_00307.3_t1	1212.91	0.0333321	0.957959	0.573439	0.103635	1.05616	0.000191114	-0.324551	0.382381	-0.462857	0.207067	0.0512015	0.927325	-0.138306	0.791983	0.375752	0.360953
SMAC_00308.3_t1	839.184	-0.424226	0.290429	0.32492	0.333469	0.0227305	0.943269	-0.291767	0.389457	-0.4462	0.177791	0.342798	0.343635	-0.154433	0.740471	0.634565	0.0452025
SMAC_00309.3_t1	570.085	-0.0632762	0.90038	0.44003	0.132717	0.448841	0.0648233	-0.810446	0.00160928	-0.933452	0.000263517	0.161798	0.672635	-0.123006	0.780604	0.972244	0.000211207
SMAC_00310.3_t1	1077.94	0.792463	0.0109752	0.428418	0.174159	0.162301	0.574055	0.161871	0.656899	0.701377	0.0144542	0.506654	0.109041	0.539506	0.0946902	0.344783	0.334206
SMAC_00311.3_t1	3030.52	0.985312	0.0754998	0.739933	0.144392	-0.532083	0.222391	-1.17494	0.00888192	-1.81032	2.52273e-05	-2.34322	2.0392e-08	-0.635377	0.267744	-1.16828	0.0145426
SMAC_00312.3_t1	157.089	0.186954	0.794588	0.680585	0.122695	1.6286	2.01428e-06	0.670076	0.107112	-0.0872623	0.890765	0.0272383	0.968654	-0.757339	0.0993542	-0.642838	0.183558
SMAC_00313.3_t1	3018.7	0.305853	0.608098	0.854307	0.0374527	1.22108	0.000280147	-0.561655	0.168776	-0.709198	0.0845426	-0.598653	0.171168	-0.147543	0.813723	-0.0369983	0.955417
SMAC_00314.3_t1	9535.15	0.579758	0.13255	0.748285	0.0234264	0.287998	0.334376	0.329814	0.345995	0.978323	0.000965818	1.07144	0.000255615	0.648509	0.0581161	0.741631	0.0209282
SMAC_00315.3_t1	3099.44	0.35327	0.403784	0.667194	0.0362488	1.05615	4.66188e-05	-0.419064	0.189512	-0.281701	0.438651	-0.526754	0.110391	0.137364	0.772946	-0.10769	0.817895
SMAC_00316.3_t1	210.398	-0.813699	0.0587156	-0.931725	0.0164187	-1.36255	2.17074e-05	1.37769	1.46297e-05	-0.0141412	0.980016	-0.677608	0.0928841	-1.39183	2.74245e-05	-2.0553	3.56304e-10
SMAC_00317.3_t1	1130.99	-2.16525	1.80951e-06	-2.24398	7.57257e-07	-4.85634	8.06391e-32	0.384949	0.490761	-0.258392	0.686812	-0.813696	0.119988	-0.643341	0.268551	-1.19865	0.012976
SMAC_00318.3_t1	41.2343	-1.95283	0.085334	-0.52637	0.622597	-3.07157	0.000692995	1.24098	0.157901	1.15061	0.223315	1.06018	0.29277	-0.0903734	0.952772	-0.180802	0.898482
SMAC_00319.3_t1	0.208809	2.61248	NA	0.899857	NA	0.660849	0.931614	0.55201	0.955504	2.68013	0.793222	1.37941	NA	2.12812	NA	0.827403	0.946352
SMAC_00320.3_t1	0	NA	NA	NA	NA	NA	NA	NA	NA	NA	NA	NA	NA	NA	NA	NA	NA
SMAC_00321.3_t1	65.528	0.00722811	0.996207	-1.18179	0.149119	0.837615	0.158343	2.75466	6.30716e-07	3.30986	1.09337e-09	-0.58833	0.5499	0.555199	0.488416	-3.34299	2.80382e-07
SMAC_00323.3_t1	35.0353	-1.14778	0.28985	-0.884496	0.32768	-0.702885	0.351761	0.14718	0.895638	0.699113	0.447505	-0.546545	0.62082	0.551933	0.623923	-0.693725	0.521763
SMAC_00324.3_t1	9.02394	-0.952204	0.568261	-0.654776	0.616872	-0.811892	0.434395	1.39178	0.150114	0.804521	0.485503	0.131229	0.941097	-0.587261	0.66726	-1.26055	0.306523
SMAC_00325.3_t1	461.903	-0.44322	0.346015	-1.06061	0.00312525	-2.52211	1.12603e-16	0.33369	0.388828	0.553829	0.134932	0.226213	0.632394	0.220138	0.66726	-0.107478	0.843241
SMAC_00326.3_t1	1124.24	0.0252941	0.974052	-0.312901	0.542995	-3.17576	1.615e-17	-1.016	0.0169712	-0.939651	0.0354965	-0.0393485	0.958144	0.0763516	0.922078	0.976654	0.0323453
SMAC_00327.3_t1	2510.45	0.181107	0.798111	-0.451195	0.322925	-1.62982	3.05976e-06	0.464047	0.298033	0.598393	0.182924	0.603999	0.189648	0.134346	0.839163	0.139953	0.824169
SMAC_00328.3_t1	457.547	0.113549	0.874766	0.504791	0.243483	0.583011	0.101678	-0.244027	0.617337	-0.298333	0.545361	0.0495948	0.941191	-0.0543057	0.938173	0.293622	0.587504
SMAC_00329.3_t1	2255.86	0.0835286	0.859269	0.223594	0.45922	1.09903	7.45036e-07	-0.173161	0.588396	-0.393921	0.170408	-0.206178	0.550909	-0.22076	0.547757	-0.0330166	0.94429
SMAC_00330.3_t1	179.058	0.0501973	0.952252	-0.410503	0.394842	0.51899	0.169312	0.857799	0.0325126	0.537252	0.244617	0.655669	0.155495	-0.320546	0.582261	-0.20213	0.738055
SMAC_00331.3_t1	309.714	-0.0580774	0.9552	-0.957855	0.0927557	-0.829387	0.0830515	-0.340508	0.599764	-0.341724	0.617928	0.723008	0.233089	-0.00121538	0.999098	1.06352	0.0580795
SMAC_00332.3_t1	510.634	-0.256003	0.751735	-1.01893	0.0476925	-2.24866	7.00346e-08	-0.632035	0.219804	0.508516	0.37122	-0.454529	0.46009	1.14055	0.024761	0.177505	0.812596
SMAC_00333.3_t1	1447.54	-0.120277	0.825387	-0.857655	0.00768177	-2.86761	7.86187e-28	-0.663184	0.0293494	-0.490231	0.145237	-0.241004	0.555219	0.172953	0.717333	0.42218	0.248998
SMAC_00334.3_t1	625.153	0.536419	0.188679	0.242766	0.520263	1.79145	2.34829e-11	0.512894	0.119846	0.137083	0.76257	-0.445428	0.242507	-0.375811	0.35734	-0.958322	0.00292104
SMAC_00335.3_t1	1361.81	-0.124769	0.825258	-0.529994	0.125783	-0.835101	0.00293223	-0.36235	0.303344	0.174305	0.685225	-0.158481	0.737149	0.536655	0.145257	0.203869	0.650755
SMAC_00336.3_t1	345.155	0.740093	0.111432	-0.869301	0.0370832	-2.0909	1.65804e-09	0.000693465	0.998865	1.71078	4.64715e-07	0.716398	0.0828059	1.71009	9.21808e-07	0.715705	0.0894249
SMAC_00337.3_t1	202.754	2.95077	8.9777e-26	0.121796	0.794649	-0.820691	0.0149932	-0.300717	0.475096	3.27098	3.83797e-33	-0.0847768	0.890525	3.5717	5.81837e-35	0.21594	0.707237
SMAC_00338.3_t1	1988.05	0.207065	0.793111	-0.161176	0.786149	-0.919168	0.0236271	1.10185	0.0120234	1.50318	0.00041443	1.72546	3.69933e-05	0.401336	0.525489	0.62361	0.242097
SMAC_00339.3_t1	0.544615	-2.58238	NA	-2.55153	NA	-2.79054	0.554716	-0.451424	0.945919	-0.398811	0.955844	-0.698142	NA	0.0526129	NA	-0.246718	0.976521
SMAC_00340.3_t1	24.9812	-0.0373798	0.979005	0.837879	0.329053	-1.26419	0.1196	1.75845	0.0129352	1.48206	0.051224	1.58293	0.0437363	-0.276391	0.806481	-0.175524	0.881643
SMAC_00341.3_t1	1343.98	-0.146056	0.863431	-0.434698	0.419206	-0.578802	0.181011	1.66846	8.55769e-05	1.71841	6.2887e-05	1.91964	5.48143e-06	0.0499561	0.952878	0.251186	0.709856
SMAC_00342.3_t1	313.082	-0.242929	0.68547	-0.102402	0.830301	0.998919	0.00159583	0.0123068	0.980219	0.101994	0.854372	0.36025	0.437071	0.0896867	0.885704	0.347943	0.470771
SMAC_00343.3_t1	620.503	0.0153141	0.979005	0.244076	0.520379	0.480024	0.101678	0.47587	0.157891	0.338409	0.376312	0.174821	0.709529	-0.137461	0.788212	-0.301049	0.480305
SMAC_00344.3_t1	635.533	0.604764	0.291368	-0.109267	0.845446	0.448037	0.266902	1.02948	0.0127907	1.41833	0.000393846	0.911984	0.0408183	0.388849	0.509037	-0.117493	0.863218
SMAC_00345.3_t1	1096.52	-0.238634	0.721236	-0.952594	0.0260159	-2.02586	5.09343e-09	0.684465	0.0957014	0.66134	0.128401	0.541141	0.247339	-0.0231256	0.974912	-0.143324	0.817442
SMAC_00346.3_t1	768.039	0.0118059	0.979297	0.290727	0.315372	0.484462	0.0346392	0.211184	0.482893	0.0168401	0.966809	0.197726	0.566825	-0.194344	0.603777	-0.0134581	0.976488
SMAC_00347.3_t1	26.4305	0.391935	0.704972	0.540273	0.456269	-0.723956	0.25294	-0.441364	0.579684	0.447873	0.563251	1.38569	0.0272057	0.889237	0.263231	1.82706	0.00457035
SMAC_00348.3_t1	192.266	-0.673705	0.150495	0.00612394	0.989478	-0.636402	0.0584462	0.149787	0.758262	0.373693	0.387688	0.937805	0.0096146	0.223906	0.685865	0.788019	0.0407633
SMAC_00349.3_t1	1057.64	0.277716	0.5464	0.38889	0.257464	0.949761	0.000387868	0.547675	0.0811256	0.882852	0.00291459	0.515783	0.132697	0.335177	0.404872	-0.031892	0.952105
SMAC_00350.3_t1	264.572	-0.477398	0.300783	-0.0617707	0.891736	-0.756867	0.0128981	0.527615	0.128276	0.114755	0.815053	-0.139619	0.791346	-0.41286	0.329618	-0.667234	0.0730594
SMAC_00351.3_t1	906.599	2.02231	6.57657e-08	-0.273719	0.574022	0.411464	0.281945	0.644674	0.123158	1.90347	1.22768e-07	-0.977826	0.0200547	1.2588	0.00161433	-1.6225	2.47273e-05
SMAC_00352.3_t1	1141.44	-0.314829	0.436195	0.504606	0.0979588	0.15317	0.590219	-1.03379	7.56838e-05	-1.12467	1.76458e-05	-0.785469	0.00530262	-0.0908803	0.849086	0.248318	0.520556
SMAC_00353.3_t1	3372.6	0.129228	0.875935	-0.517019	0.30717	-2.06845	8.31038e-08	0.35608	0.503897	0.616213	0.224321	1.08296	0.0172439	0.260133	0.705185	0.726876	0.152618
SMAC_00354.3_t1	947.79	-0.819785	0.329014	-0.65045	0.35089	-0.282453	0.651458	0.611644	0.379391	0.946579	0.161164	1.21243	0.0631005	0.334936	0.725469	0.600786	0.448319
SMAC_00355.3_t1	184.407	-0.397861	0.378319	0.137626	0.734191	0.975292	0.000235505	0.980555	0.000538098	0.741987	0.0149454	0.702499	0.0305223	-0.238568	0.583617	-0.278056	0.500505
SMAC_00356.3_t1	12366.7	-0.162219	0.807381	0.492685	0.240228	0.91151	0.00647473	0.612952	0.11817	-0.349339	0.446993	-0.516214	0.242122	-0.962291	0.0151056	-1.12917	0.00235802
SMAC_00357.3_t1	317.23	0.41298	0.445427	0.73663	0.0692076	2.23952	9.62774e-13	0.232394	0.621565	0.31386	0.501121	0.0290083	0.964237	0.0814664	0.901041	-0.203386	0.720001
SMAC_00358.3_t1	2067.08	1.10126	0.0117493	0.0578709	0.914757	-0.0325996	0.940379	-1.16811	0.00222853	-0.422602	0.37963	-0.337816	0.522207	0.745505	0.102268	0.830291	0.0546474
SMAC_00360.3_t1	286.785	-0.143182	0.805903	-0.799625	0.026449	-0.531437	0.0799214	0.252213	0.520159	0.248578	0.54789	0.558344	0.127501	-0.00363453	0.994938	0.306131	0.484124
SMAC_00362.3_t1	976.385	-0.264132	0.681566	-1.14768	0.00555323	-0.0781486	0.854796	0.379262	0.400781	0.632015	0.143099	0.441053	0.361297	0.252753	0.670921	0.0617907	0.928952
SMAC_00363.3_t1	9.49279	1.4343	0.334998	1.21063	0.330546	1.75486	0.0701835	0.479971	0.748083	1.17731	0.358505	-0.0272169	0.989097	0.697335	0.670399	-0.507188	0.794209
SMAC_00364.3_t1	4157.12	-0.034554	0.953321	-0.0194422	0.959915	0.842806	0.00104224	-0.659486	0.022505	-0.590808	0.0538891	-0.453696	0.172946	0.0686773	0.89194	0.20579	0.61292
SMAC_00365.3_t1	239.539	0.0534198	0.955369	0.333704	0.561848	0.281901	0.55886	-0.831341	0.0963082	-1.52568	0.00110516	-1.03877	0.045932	-0.694337	0.250771	-0.207433	0.787685
SMAC_00366.3_t1	1435.78	0.133316	0.774569	0.536674	0.0661637	-0.243201	0.353404	-0.348783	0.237968	-0.144575	0.696966	0.290923	0.387705	0.204207	0.610405	0.639705	0.0240879
SMAC_00367.3_t1	16065.4	-0.157605	0.750993	0.330697	0.319469	1.16319	4.52358e-06	-0.526628	0.0797942	-0.600073	0.0498391	-0.567931	0.0723231	-0.0734454	0.883306	-0.0413026	0.936159
SMAC_00368.3_t1	319.5	-0.126343	0.81855	-0.135598	0.734191	1.51815	3.16733e-09	0.765201	0.00881257	0.523791	0.10932	0.0884792	0.859576	-0.24141	0.578775	-0.676722	0.0399553
SMAC_00369.3_t1	1266.59	-0.0134355	0.980414	-0.408354	0.248355	-0.556393	0.0530188	-0.476507	0.153406	0.0336834	0.944859	0.157554	0.738373	0.510191	0.172406	0.634062	0.0652491
SMAC_00370.3_t1	278.561	-0.138268	0.865309	-0.53128	0.293172	1.07541	0.0057362	-0.271411	0.625579	-0.0103206	0.987448	0.445101	0.427423	0.261091	0.703042	0.716512	0.159692
SMAC_00372.3_t1	1458.12	0.129919	0.800542	-0.00471914	0.989883	-0.56155	0.0326751	0.0179647	0.96433	0.16819	0.666676	0.0323326	0.94704	0.150225	0.741426	0.0143679	0.977771
SMAC_00373.3_t1	1098.27	0.919983	0.0902052	0.897744	0.062621	2.59341	8.51595e-12	0.168062	0.782666	-0.220495	0.726023	-0.185988	0.789144	-0.388556	0.540581	-0.35405	0.564311
SMAC_00374.3_t1	282.527	0.316978	0.558683	0.0683392	0.889071	1.88588	2.97137e-10	1.10093	0.000907431	1.22719	0.000207938	0.790559	0.0350476	0.126253	0.824071	-0.310374	0.517094
SMAC_00375.3_t1	190.717	-0.0362137	0.9674	0.30923	0.588956	-1.67484	9.56002e-05	0.0995793	0.884628	0.724255	0.161667	0.556822	0.333315	0.624675	0.285429	0.457243	0.461639
SMAC_00376.3_t1	874.274	-0.379744	0.696859	-1.14229	0.0747581	-0.0470444	0.941543	-0.369354	0.618256	-0.0484992	0.959397	0.355348	0.669955	0.320855	0.729121	0.724702	0.319241
SMAC_00377.3_t1	266.857	0.411466	0.369162	0.0380505	0.932353	1.53581	3.12403e-08	-0.0829272	0.8607	0.414977	0.271585	0.205379	0.665353	0.497905	0.210708	0.288307	0.527925
SMAC_00378.3_t1	216.637	0.285763	0.608098	0.487007	0.219998	1.15332	0.000174637	1.16641	0.000372964	-0.342201	0.435532	-0.00112859	0.99805	-1.50861	6.95524e-06	-1.16753	0.00101229
SMAC_00379.3_t1	25634.3	0.568438	0.306177	1.23466	0.00357784	0.733759	0.0480042	-0.563381	0.198884	-1.09496	0.00667575	-0.717074	0.111431	-0.531583	0.30028	-0.153693	0.80855
SMAC_00380.3_t1	3915.52	0.362912	0.526783	0.460484	0.288986	1.25644	0.000189325	1.22218	0.000725401	-0.548888	0.206715	-0.491531	0.28544	-1.77107	6.54246e-07	-1.71371	1.38607e-06
SMAC_00381.3_t1	587.935	0.524454	0.337707	0.35991	0.438994	2.11592	3.7754e-10	0.312186	0.512884	0.392212	0.416364	0.417113	0.404678	0.0800266	0.909837	0.104928	0.872008
SMAC_00382.3_t1	86.8954	-0.539296	0.533561	0.405318	0.549952	0.209577	0.720491	-0.303027	0.681531	-0.70239	0.29554	-0.256707	0.773526	-0.399363	0.649047	0.0463202	0.963585
SMAC_00383.3_t1	179.103	-0.525432	0.340459	0.124472	0.810095	-1.00851	0.00509301	1.73479	4.54936e-07	-0.425487	0.366614	0.412301	0.404164	-2.16027	6.76232e-10	-1.32249	0.000421063
SMAC_00384.3_t1	9663.22	0.349324	0.550249	0.466166	0.288213	1.35175	6.80139e-05	-1.34415	0.000206588	-0.800566	0.0489601	-0.615735	0.162119	0.543585	0.256199	0.728416	0.0900917
SMAC_00385.3_t1	1883.85	0.777206	0.138556	0.721882	0.114633	-0.0296169	0.947794	-0.40897	0.398018	-0.0400261	0.952279	-0.402898	0.457329	0.368944	0.535925	0.00607282	0.992651
SMAC_00386.3_t1	126.512	0.54388	0.320443	0.568037	0.198786	0.655099	0.0696635	-0.0204438	0.97078	0.0854846	0.890937	0.330372	0.543403	0.105928	0.878603	0.350816	0.528596
SMAC_00387.3_t1	463.629	-0.673081	0.293269	0.177852	0.773734	-4.19743	1.38368e-22	-0.25373	0.67588	-1.14461	0.0166876	-1.14999	0.0185976	-0.89088	0.0977381	-0.896263	0.0896802
SMAC_00388.3_t1	849.693	0.233519	0.594076	-0.136023	0.707794	-0.691202	0.00675075	0.178021	0.617553	0.307497	0.364921	0.171052	0.673459	0.129475	0.774961	-0.00696948	0.987566
SMAC_00389.3_t1	487.891	-0.300725	0.712857	-0.965267	0.0695456	-0.340788	0.481705	-0.234305	0.714493	-0.0915099	0.904376	0.334834	0.619475	0.142795	0.861711	0.569139	0.352921
SMAC_00390.3_t1	112.534	0.120665	0.878959	0.565888	0.22861	0.989882	0.00745155	0.373395	0.446241	0.297996	0.583926	0.193577	0.771004	-0.0753985	0.920991	-0.179818	0.789203
SMAC_00391.3_t1	478.389	0.653828	0.147546	1.18693	0.0011961	0.97103	0.0021719	-0.295658	0.492166	-0.397413	0.357952	-0.0693332	0.91269	-0.101756	0.869626	0.226325	0.668506
SMAC_00392.3_t1	382.79	0.552829	0.267826	0.935571	0.0181535	0.712351	0.0343358	0.0700706	0.898951	0.0769826	0.896769	0.243336	0.645596	0.00691206	0.990929	0.173265	0.761449
SMAC_00393.3_t1	151.736	0.402427	0.496166	0.788096	0.0667846	0.907004	0.00986442	1.18636	0.00134075	1.14368	0.00256043	0.902775	0.0304404	-0.0426757	0.95251	-0.283585	0.604799
SMAC_00394.3_t1	196.685	-0.480779	0.333707	-0.770328	0.049116	-1.56502	9.22967e-07	-1.77305	8.72554e-08	-1.16448	0.000771723	-1.8598	8.45122e-08	0.608571	0.172078	-0.0867488	0.897774
SMAC_00396.3_t1	5113.74	0.787356	0.129762	0.705645	0.121912	-1.67529	4.02264e-06	0.0598134	0.923178	1.0118	0.0163686	0.523359	0.296739	0.951988	0.0348063	0.463546	0.380741
SMAC_00397.3_t1	172.155	0.371584	0.515171	0.694547	0.0939482	0.174634	0.657265	0.262558	0.578266	0.264957	0.593409	0.401826	0.411566	0.00239916	0.997155	0.139268	0.819022
SMAC_00398.3_t1	45.1346	-0.145514	0.885266	-0.200612	0.780133	-0.520873	0.3219	0.574224	0.319458	0.92704	0.0894139	0.840154	0.158114	0.352816	0.64365	0.26593	0.732803
SMAC_00399.3_t1	106.186	0.895387	0.118617	0.147293	0.811582	-3.23797	4.50188e-12	-2.74973	2.41657e-09	-1.82651	6.3567e-05	-2.39103	1.26633e-06	0.923222	0.143163	0.358703	0.672065
SMAC_00400.3_t1	347.83	0.071193	0.911248	0.345619	0.358059	1.48375	1.0204e-07	-0.0589045	0.902216	-0.279599	0.495196	-0.0170932	0.97571	-0.220694	0.659008	0.0418113	0.944996
SMAC_00401.3_t1	261.668	1.1383	0.00235628	0.976216	0.00970972	-0.184562	0.61917	0.833575	0.0174589	1.19653	0.000366011	0.753574	0.0499883	0.362953	0.446219	-0.0800017	0.895843
SMAC_00402.3_t1	1145.61	1.30738	0.00742453	0.184097	0.754474	2.76664	5.83292e-13	0.0510176	0.93906	0.375585	0.506938	-0.395199	0.510379	0.324568	0.630362	-0.446216	0.455108
SMAC_00403.3_t1	684.216	1.26377	0.00192167	1.01742	0.0139141	-0.0829778	0.845909	-1.14238	0.00245358	-1.00759	0.0104982	-0.936921	0.022414	0.13479	0.837881	0.20546	0.730473
SMAC_00404.3_t1	1.01877	-0.536361	NA	-0.505531	NA	0.703782	0.862366	3.13628	0.422872	3.31272	0.418102	1.35905	NA	0.176438	NA	-1.77723	0.720001
SMAC_00405.3_t1	616.629	-0.237613	0.61719	-0.277861	0.436011	0.125241	0.688436	0.482608	0.125997	0.434193	0.201084	0.245604	0.545662	-0.0484154	0.928502	-0.237003	0.569789
SMAC_00406.3_t1	443.756	-0.882343	0.0305042	-0.829173	0.0301707	1.20756	6.74795e-05	0.339835	0.397282	0.274541	0.532752	0.8123	0.0245598	-0.0652938	0.917408	0.472466	0.261701
SMAC_00407.3_t1	1123.74	-0.124848	0.859506	-0.401413	0.365327	0.672906	0.0547094	0.202179	0.685111	-0.00311973	0.996511	0.118825	0.847133	-0.205298	0.733906	-0.083353	0.899171
SMAC_00408.3_t1	676.057	0.822739	0.117664	-0.0334305	0.953843	0.398715	0.330449	-0.247837	0.647306	0.201642	0.737664	0.139131	0.837285	0.449479	0.431585	0.386968	0.49965
SMAC_00409.3_t1	856.2	1.30548	0.00188069	0.520875	0.248784	-2.68781	8.13147e-14	0.0127606	0.981438	1.72341	2.84101e-06	0.860354	0.0430079	1.71065	6.20613e-06	0.847593	0.0504493
SMAC_00410.3_t1	1776.54	0.217574	0.563508	0.352455	0.20077	0.674811	0.00211566	-0.682368	0.00445616	-0.566446	0.0263681	-0.410381	0.145525	0.115922	0.772117	0.271987	0.397701
SMAC_00411.3_t1	242.986	0.268345	0.647082	0.33829	0.43187	0.756362	0.0210848	0.0696837	0.897585	-0.326084	0.474066	-0.332388	0.501656	-0.395767	0.424742	-0.402072	0.410013
SMAC_00412.3_t1	300.956	-0.122265	0.852476	-0.109328	0.818954	0.761383	0.0176833	0.222932	0.621412	0.183852	0.712566	0.501142	0.237252	-0.0390801	0.952954	0.27821	0.576972
SMAC_00413.3_t1	1516.53	0.651876	0.0857814	0.539275	0.114255	1.01417	0.00021375	0.681524	0.0287361	-0.28158	0.465351	-0.489041	0.175298	-0.963104	0.00230639	-1.17057	9.51105e-05
SMAC_00414.3_t1	462.016	-0.379554	0.538903	0.609955	0.175618	0.253615	0.536353	0.257556	0.615462	-0.347067	0.497326	-0.00882401	0.989258	-0.604623	0.225869	-0.26638	0.648283
SMAC_00415.3_t1	238.548	-0.842256	0.0117134	-0.464933	0.161776	-0.549066	0.0430587	0.232137	0.507558	-0.027111	0.953505	0.37552	0.29107	-0.259248	0.534408	0.143383	0.74759
SMAC_00416.3_t1	1827.84	0.269482	0.531535	-0.0876888	0.81772	-1.24504	7.66608e-07	0.342549	0.283111	0.89035	0.00129405	0.895659	0.00131935	0.547801	0.0920293	0.553111	0.0806464
SMAC_00417.3_t1	4.34691	-3.63796	NA	-0.12883	0.961787	-0.393874	0.859186	2.74687	0.16535	0.290218	0.923171	0.140976	NA	-2.45666	NA	-2.6059	0.282337
SMAC_00418.3_t1	2744.43	-0.299009	0.416836	-0.806781	0.00256323	-1.89266	8.79621e-18	-0.580755	0.0233448	0.0194315	0.962765	-0.150024	0.6852	0.600187	0.0311171	0.430732	0.144966
SMAC_00419.3_t1	324.958	-0.255692	0.640074	-1.008	0.0062917	-0.261588	0.439883	0.194521	0.654449	0.32303	0.436721	0.478197	0.234577	0.128509	0.818169	0.283677	0.544525
SMAC_00420.3_t1	11433.3	-0.309843	0.595282	0.401869	0.351895	0.649621	0.0595464	0.481827	0.244058	-0.381629	0.406461	-0.308223	0.540267	-0.863456	0.0346296	-0.79005	0.0511887
SMAC_00421.3_t1	1772.52	0.18186	0.557762	0.524847	0.0158259	1.09277	4.25107e-10	0.00908376	0.974649	-0.0877762	0.766065	0.0690816	0.833272	-0.0968599	0.76784	0.0599978	0.856286
SMAC_00422.3_t1	135.474	-0.381424	0.396191	-0.0262088	0.950976	-0.117523	0.713125	0.511267	0.0992137	0.761773	0.00997601	0.236986	0.578715	0.250506	0.553353	-0.27428	0.517788
SMAC_00423.3_t1	57.7276	0.0719654	0.94075	0.189904	0.763103	0.968807	0.0198777	0.79452	0.0977729	0.794142	0.114267	0.2903	0.681376	-0.000377812	0.999512	-0.50422	0.426681
SMAC_00424.3_t1	1077.39	-0.128002	0.859167	-0.222231	0.650856	0.701325	0.049955	0.148467	0.782095	-0.0476255	0.937015	-0.143534	0.816229	-0.196092	0.752702	-0.292001	0.59217
SMAC_00425.3_t1	930.509	-0.232828	0.590276	-0.525213	0.0866972	-1.56948	1.74897e-10	0.861334	0.00101008	1.18401	3.10797e-06	1.38005	3.3299e-08	0.322677	0.367856	0.518714	0.0901643
SMAC_00426.3_t1	1696.7	-0.22066	0.812856	-1.29677	0.0207474	-1.06754	0.0242132	0.415498	0.508603	0.7135	0.233664	0.273843	0.723444	0.298002	0.715907	-0.141655	0.866849
SMAC_00427.3_t1	1132.55	-0.416328	0.309636	-0.319073	0.352009	-1.78737	4.50188e-12	-2.23947	1.42448e-17	-1.48993	3.93232e-08	-1.51482	3.02191e-08	0.749543	0.0211264	0.724651	0.0242016
SMAC_00428.3_t1	494.473	1.01442	0.00749496	0.662087	0.0826223	0.603603	0.0595032	-0.782392	0.0277035	0.587562	0.125971	0.329513	0.47341	1.36995	6.03809e-05	1.1119	0.0017117
SMAC_00429.3_t1	746.117	-0.13149	0.781759	0.227388	0.479896	0.215043	0.421239	-0.138118	0.697151	-0.468797	0.115921	0.0354518	0.940083	-0.33068	0.349157	0.173569	0.660648
SMAC_00430.3_t1	650.173	0.629189	0.0912712	0.53982	0.105664	0.925525	0.000541314	0.83155	0.0044684	1.32309	1.7997e-06	1.21761	1.71835e-05	0.491538	0.168338	0.386064	0.301125
SMAC_00431.3_t1	172.945	1.64493	0.000210347	0.890778	0.0661637	2.77506	8.39208e-14	-0.735852	0.13271	-0.243209	0.69795	-0.160797	0.830037	0.492643	0.440524	0.575055	0.3489
SMAC_00432.3_t1	2138.18	0.658764	0.147546	0.830913	0.0319628	1.1427	0.000317848	-0.467768	0.237095	-0.293622	0.51871	-0.540811	0.197082	0.174146	0.762864	-0.0730429	0.905767
SMAC_00433.3_t1	219.046	-0.782764	0.174825	-0.683959	0.169694	1.0935	0.00517577	-0.114938	0.855881	-0.110771	0.871896	-0.116664	0.872427	0.00416656	0.995871	-0.0017262	0.997803
SMAC_00434.3_t1	48.2766	0.483698	0.531094	0.255593	0.700716	0.7749	0.09821	-0.801043	0.164317	-0.333416	0.633613	-0.331823	0.674754	0.467628	0.555912	0.46922	0.55506
SMAC_00435.3_t1	34.555	-0.333212	0.802495	0.696231	0.412597	-7.71167	2.92982e-06	-1.19243	0.139933	0.34064	0.74147	0.376705	0.733336	1.53307	0.0742632	1.56914	0.0651986
SMAC_00436.3_t1	934.322	-0.424844	0.157765	-0.401416	0.123231	-1.38116	2.11029e-11	0.0615058	0.854818	0.14978	0.632893	0.336089	0.223749	0.0882737	0.818558	0.274583	0.358909
SMAC_00437.3_t1	8082.24	0.2624	0.686269	0.55104	0.208536	0.454258	0.223294	0.228274	0.649221	-0.365432	0.44965	-0.510261	0.279038	-0.593705	0.213264	-0.738535	0.090785
SMAC_00438.3_t1	418.645	-0.32332	0.417395	-0.0817359	0.82392	0.473482	0.0582077	0.502499	0.0733527	0.299041	0.361553	0.462025	0.137746	-0.203457	0.616215	-0.0404738	0.934443
SMAC_00439.3_t1	2429.09	-0.791048	0.0514312	-1.08157	0.00246934	-4.35752	5.70853e-49	-1.39536	1.05041e-05	-0.705802	0.0514237	-0.52713	0.183645	0.689558	0.0751036	0.86823	0.0147785
SMAC_00440.3_t1	2293.43	-0.124671	0.81085	-0.0681615	0.860663	-0.981921	0.000138022	-1.41606	8.25769e-08	-1.12491	4.11428e-05	-1.21383	8.41173e-06	0.29115	0.472385	0.202235	0.624304
SMAC_00441.3_t1	662.575	0.12032	0.778571	-0.0685782	0.833286	-0.878796	6.2087e-05	-0.144358	0.645528	0.511495	0.0455322	0.449544	0.0988105	0.655853	0.0110645	0.593902	0.0223076
SMAC_00442.3_t1	1175.24	-0.0564248	0.906678	0.318976	0.259662	0.705624	0.00146363	1.20129	8.57147e-08	0.534924	0.0399318	0.417472	0.141974	-0.666362	0.0106498	-0.783814	0.00156132
SMAC_00443.3_t1	1389.64	0.143205	0.835717	0.861479	0.0368529	0.140222	0.724617	-1.07589	0.00377223	-0.899635	0.0222048	-0.391893	0.424036	0.17626	0.776158	0.684002	0.117116
SMAC_00444.3_t1	62.872	-1.3682	0.103467	0.698687	0.3362	-0.982304	0.108705	0.32442	0.69585	0.222154	0.813893	1.02824	0.154234	-0.102265	0.928611	0.703818	0.387938
SMAC_00445.3_t1	89.0204	0.92412	0.0640645	-0.154777	0.789523	-0.708936	0.0829205	0.0330288	0.956107	1.44847	0.000183778	0.0453514	0.951572	1.41544	0.000608166	0.0123226	0.985877
SMAC_00446.3_t1	1587.82	0.437617	0.358389	1.07345	0.0024142	0.229199	0.503214	-0.349802	0.37259	-0.520387	0.176455	-0.070887	0.903074	-0.170584	0.754403	0.278915	0.552776
SMAC_00447.3_t1	383.031	0.255312	0.620142	-0.321447	0.405399	0.934095	0.0011568	0.265511	0.497488	0.103003	0.834234	-0.0292686	0.959134	-0.162508	0.754403	-0.29478	0.511551
SMAC_00448.3_t1	1095.39	0.128713	0.899877	-0.773019	0.200663	-1.17482	0.0164096	0.479846	0.449486	0.920608	0.120277	0.980087	0.10012	0.440762	0.573581	0.500241	0.488379
SMAC_00450.3_t1	404.424	-0.375536	0.434423	-0.809825	0.0250572	-0.11642	0.736096	0.210231	0.612849	-0.0694059	0.894245	-0.152609	0.766172	-0.279637	0.556021	-0.36284	0.399357
SMAC_00451.3_t1	892.465	0.972639	0.0325076	0.660337	0.129931	0.387814	0.309796	-0.0178409	0.974443	0.519935	0.25606	-0.157403	0.800583	0.537776	0.277072	-0.139562	0.825085
SMAC_00452.3_t1	2018.85	1.41861	0.00160591	0.768673	0.102363	1.32463	0.000488255	-0.224809	0.688926	0.305294	0.587515	-0.568453	0.271239	0.530103	0.338889	-0.343644	0.562042
SMAC_00453.3_t1	225.365	-0.560922	0.415065	-0.2446	0.688767	-0.96479	0.0274094	-0.507609	0.351355	-0.295558	0.643508	0.554054	0.345302	0.212051	0.784963	1.06166	0.0380219
SMAC_00454.3_t1	127.826	-0.0337848	0.972036	0.341899	0.580541	-1.50443	0.00156707	1.21494	0.0134697	0.822748	0.137186	0.569516	0.367631	-0.392195	0.590325	-0.645427	0.300787
SMAC_00455.3_t1	69.6813	-0.245044	0.801867	0.391875	0.541799	-0.370696	0.496707	0.636286	0.278897	0.567059	0.373337	0.274654	0.737597	-0.0692274	0.941084	-0.361632	0.639084
SMAC_00456.3_t1	707.863	0.0263339	0.974052	0.423545	0.41448	1.51984	9.20131e-05	1.20335	0.0049528	0.978248	0.0328774	0.523094	0.338975	-0.2251	0.746885	-0.680255	0.189855
SMAC_00457.3_t1	2012.88	0.471336	0.229483	0.0635939	0.87388	-0.346547	0.219652	-0.810171	0.00496564	-0.466585	0.159396	-0.435227	0.210811	0.343585	0.378719	0.374944	0.311289
SMAC_00458.3_t1	574.805	0.454557	0.369854	0.36288	0.388747	3.94919	1.53022e-40	0.331957	0.430035	-0.507902	0.224735	-0.64753	0.128918	-0.83986	0.0350285	-0.979488	0.0125365
SMAC_00459.3_t1	195.918	-0.0362031	0.967714	-0.87048	0.101439	-0.587681	0.194423	0.460357	0.400551	0.571324	0.303621	0.37883	0.554921	0.110967	0.892096	-0.0815264	0.922349
SMAC_00460.3_t1	222.021	-0.417736	0.407079	-0.146547	0.747981	0.0375807	0.923584	0.845113	0.0115812	0.406882	0.314805	0.544227	0.171745	-0.438231	0.311118	-0.300886	0.521803
SMAC_00461.3_t1	1154.51	-0.255789	0.669024	-0.327375	0.448473	-3.24732	1.1906e-24	-1.20756	0.000503065	-2.44749	6.55869e-14	-2.8196	7.21295e-18	-1.23993	0.00081609	-1.61204	4.62248e-06
SMAC_00462.3_t1	45.8073	0.606821	0.532604	-0.645305	0.40858	-1.79865	0.0038473	-0.744619	0.317687	-0.470431	0.581854	-1.25067	0.109484	0.274188	0.802623	-0.50605	0.615179
SMAC_00463.3_t1	3133.3	1.95565	0.000996408	-0.876629	0.168499	-1.41967	0.00576931	-0.589777	0.37007	0.43038	0.558344	-0.547228	0.462621	1.02016	0.125452	0.0425487	0.966638
SMAC_00464.3_t1	1785.19	0.0789861	0.931419	-1.33177	0.00623748	-2.36702	3.57968e-09	-0.508462	0.330131	-0.0667406	0.925731	-0.232356	0.737252	0.441722	0.493088	0.276106	0.68161
SMAC_00465.3_t1	1324.19	0.545779	0.337209	0.62677	0.169066	0.81082	0.0297458	0.0797351	0.895929	-0.505912	0.295344	-0.707761	0.12739	-0.585647	0.248539	-0.787496	0.0864175
SMAC_00466.3_t1	143.345	0.0897026	0.881843	0.72776	0.0329667	0.439446	0.137015	0.314927	0.388879	0.0422115	0.931029	0.465041	0.223438	-0.272715	0.553353	0.150114	0.76283
SMAC_00467.3_t1	2261.12	0.268641	0.54515	0.763737	0.0145395	1.31558	2.32048e-07	-0.307819	0.359711	-0.683495	0.0234567	-0.201718	0.622779	-0.375676	0.317388	0.106102	0.818793
SMAC_00468.3_t1	251.235	0.0770175	0.933246	0.412621	0.443028	0.180143	0.704569	-0.322617	0.570259	-0.0879848	0.903179	0.0653183	0.934956	0.234632	0.747641	0.387935	0.539991
SMAC_00468.3_t2	0	NA	NA	NA	NA	NA	NA	NA	NA	NA	NA	NA	NA	NA	NA	NA	NA
SMAC_00469.3_t1	939.688	0.136302	0.756267	0.418855	0.137272	0.628664	0.00583091	-0.0613948	0.868727	-0.235544	0.455015	-0.402132	0.17775	-0.174149	0.655347	-0.340738	0.286444
SMAC_00470.3_t1	973.408	-0.0806857	0.86479	0.0502973	0.884433	0.555849	0.0153974	-0.69239	0.00534039	-0.754138	0.00262786	-0.8218	0.00113765	-0.061748	0.890906	-0.12941	0.741916
SMAC_00471.3_t1	1178.66	0.303871	0.69692	-0.136065	0.827513	-0.105824	0.837489	-0.160576	0.805876	0.178636	0.797246	0.596121	0.293382	0.339212	0.630362	0.756697	0.163026
SMAC_00472.3_t1	1392.22	-0.360252	0.224817	-0.542507	0.0251076	-1.4905	1.5538e-14	-0.572112	0.00923392	-0.977333	2.45567e-06	-0.731177	0.000861607	-0.405221	0.122116	-0.159064	0.617725
SMAC_00473.3_t1	829.745	-0.356053	0.334998	-0.258505	0.406105	0.937272	5.08973e-05	-0.908188	0.000300773	-0.616928	0.0237498	-0.347755	0.279835	0.29126	0.419985	0.560433	0.0571652
SMAC_00474.3_t1	565.57	-0.727571	0.137174	-1.01349	0.0150866	-0.592626	0.0999481	-0.882743	0.0227996	-1.16408	0.00218029	-1.42352	0.000140052	-0.281339	0.632228	-0.540777	0.258457
SMAC_00475.3_t1	364.349	-0.167794	0.825258	-1.02534	0.0248767	-1.65222	9.87546e-06	-0.849546	0.0477147	-0.259855	0.644518	-0.552396	0.278466	0.589691	0.262476	0.29715	0.619538
SMAC_00476.3_t1	269.917	0.0489856	0.94075	-0.376298	0.321853	0.0462051	0.899288	-1.31688	2.28313e-05	-0.317953	0.429753	-0.803381	0.0227552	0.998923	0.00412523	0.513494	0.215884
SMAC_00477.3_t1	376.164	-0.0333991	0.958238	0.480607	0.183976	-0.0741111	0.83608	-0.163501	0.703099	-0.384694	0.321031	-0.314581	0.466766	-0.221192	0.657913	-0.15108	0.767331
SMAC_00478.3_t1	285.516	-0.119042	0.892276	-0.535819	0.317649	1.11279	0.00685424	0.245226	0.682866	0.501677	0.365626	0.621064	0.260157	0.256451	0.724537	0.375839	0.554077
SMAC_00479.3_t1	5123.48	0.270639	0.615093	-0.237659	0.567754	-0.696961	0.0252816	-0.959559	0.00381077	-0.78152	0.0273009	-0.984162	0.00381518	0.178039	0.742635	-0.0246023	0.967772
SMAC_00480.3_t1	677.33	0.441984	0.503371	0.865958	0.0729843	0.613756	0.137735	0.178461	0.767856	-0.169673	0.796019	-0.329456	0.590206	-0.348134	0.594216	-0.507917	0.37282
SMAC_00481.3_t1	54.3828	-0.578755	0.562033	0.505803	0.507367	-1.98426	0.00124381	-0.996559	0.154414	-0.95169	0.199847	0.308932	0.754316	0.0448692	0.970936	1.30549	0.0764914
SMAC_00482.3_t1	659.499	0.0578962	0.92482	-0.0351305	0.933207	0.59739	0.0331368	0.193768	0.619855	-0.0883295	0.853668	0.192525	0.664157	-0.282098	0.519916	-0.00124349	0.997758
SMAC_00483.3_t1	539.113	-0.037527	0.955665	1.07269	0.00201743	1.41966	1.09401e-06	-0.393521	0.300157	-0.411726	0.301506	-0.340879	0.438419	-0.0182045	0.977457	0.0526422	0.932333
SMAC_00484.3_t1	535.982	0.449133	0.302727	1.02104	0.00186379	1.04697	0.000172472	0.0945068	0.835224	-0.151687	0.738693	-0.015274	0.977432	-0.246194	0.603128	-0.109781	0.831364
SMAC_00485.3_t1	120.061	0.169675	0.808408	0.660756	0.117516	1.65321	2.65708e-07	1.57584	3.0994e-06	0.754331	0.0583767	1.21902	0.00101474	-0.821505	0.0393506	-0.356821	0.467816
SMAC_00486.3_t1	137.532	0.261722	0.779061	0.422912	0.507367	-4.24134	1.49484e-13	-1.13585	0.0391925	-0.478374	0.474066	-0.00963462	0.990196	0.657475	0.356348	1.12621	0.0612914
SMAC_00487.3_t1	272.404	0.795166	0.193396	1.27077	0.0105875	1.43838	0.000498725	0.156293	0.812522	0.0871639	0.906334	-0.00256989	0.997011	-0.069129	0.935416	-0.158863	0.834836
SMAC_00488.3_t1	193.96	0.057062	0.939743	0.111528	0.819378	0.617502	0.0642686	0.465373	0.245124	-0.0322561	0.956408	0.0915575	0.87975	-0.497629	0.277361	-0.373816	0.446163
SMAC_00489.3_t1	464.741	-0.872127	0.00755375	-0.695875	0.0306212	0.814898	0.00171428	-0.432438	0.172011	-0.469346	0.153381	-0.217111	0.59646	-0.0369082	0.945056	0.215327	0.609381
SMAC_00490.3_t1	2146.08	0.149245	0.73997	-0.0711224	0.838792	-0.174057	0.512484	0.7052	0.00583252	-0.358569	0.23856	-0.0980625	0.813052	-1.06377	2.49338e-05	-0.803262	0.00227323
SMAC_00491.3_t1	2797.91	0.211857	0.544532	-0.187174	0.496054	0.0902943	0.706733	-0.225256	0.400694	-0.700154	0.0018744	-0.741319	0.00102576	-0.474897	0.0669129	-0.516063	0.0376043
SMAC_00493.3_t1	2181.77	-0.173803	0.723761	-0.47337	0.142227	-0.907791	0.000440851	0.24452	0.48065	0.586131	0.0568209	0.602715	0.053051	0.341611	0.368009	0.358195	0.322958
SMAC_00494.3_t1	2287.69	-0.257524	0.590378	-0.58443	0.0832952	-0.0284833	0.932667	-0.0392772	0.931859	-0.0952729	0.838845	0.19956	0.647169	-0.0559958	0.920374	0.238837	0.576133
SMAC_00495.3_t1	691.953	0.0491795	0.944473	-0.419313	0.298519	1.32272	1.46125e-05	0.0881464	0.86176	0.347043	0.417722	0.132635	0.809876	0.258896	0.620205	0.0444884	0.94499
SMAC_00496.3_t1	2360.78	0.324607	0.477138	0.321532	0.370164	3.5592	6.1527e-43	0.161593	0.689716	-0.760134	0.0164085	-0.749711	0.0214095	-0.921727	0.00397162	-0.911304	0.00405063
SMAC_00497.3_t1	1002.39	-0.258325	0.563793	0.136964	0.716408	-0.464025	0.0869951	-1.38534	2.26891e-07	-1.02812	0.000237608	-0.410514	0.238577	0.357226	0.354756	0.974831	0.000837206
SMAC_00498.3_t1	550.819	0.932107	0.00221806	0.465498	0.147198	1.31188	1.43081e-07	0.210741	0.553402	0.369176	0.273228	-0.0294514	0.953068	0.158435	0.729294	-0.240193	0.554077
SMAC_00499.3_t1	1313.64	0.625768	0.134988	0.712454	0.0487416	0.618201	0.0424749	-0.395525	0.290135	-0.377809	0.345378	-0.374269	0.370762	0.0177164	0.977457	0.0212558	0.971305
SMAC_00500.3_t1	369.172	0.408959	0.432622	0.0228243	0.961905	0.835909	0.00940965	0.0821092	0.875374	-0.204527	0.679266	-0.438247	0.332827	-0.286637	0.589787	-0.520357	0.23971
SMAC_00501.3_t1	4811.63	0.00325563	0.996537	0.639122	0.186247	0.619283	0.126416	0.142879	0.814371	-0.0849836	0.901962	0.367799	0.523905	-0.227862	0.740402	0.22492	0.727803
SMAC_00502.3_t1	2092.47	-0.328181	0.498568	-0.276177	0.475055	1.46377	2.13187e-07	0.408234	0.255938	1.0632	0.000640433	1.24906	4.29626e-05	0.654966	0.0726005	0.840828	0.0119632
SMAC_00503.3_t1	539.303	-0.14923	0.80535	-0.16949	0.696265	-0.0684114	0.853991	-0.318309	0.42134	-0.45327	0.247921	0.225058	0.637166	-0.134961	0.809124	0.543367	0.169508
SMAC_00504.3_t1	638.778	-0.30639	0.528382	-0.159408	0.699578	0.224254	0.486053	-0.830494	0.00881257	-1.11419	0.000318414	-1.11459	0.000420035	-0.283691	0.545095	-0.2841	0.528025
SMAC_00505.3_t1	656.728	2.59156	5.31517e-12	0.897966	0.0445705	0.211772	0.61799	0.395256	0.411323	1.27285	0.00140859	0.403339	0.453698	0.877595	0.0547198	0.00808338	0.990162
SMAC_00506.3_t1	2661.75	-0.000674674	0.999186	-0.936173	0.0329675	-1.16891	0.00123669	0.211468	0.690386	0.50475	0.289557	0.00995227	0.988297	0.293283	0.630362	-0.201515	0.741068
SMAC_00507.3_t1	985.283	-0.0278755	0.962759	-0.453852	0.192927	1.26247	2.78237e-06	1.23146	1.51086e-05	0.206398	0.615696	-0.175094	0.70155	-1.02506	0.000910355	-1.40655	1.19694e-06
SMAC_00508.3_t1	13733.4	-3.13551	0.0120106	-5.95331	2.80952e-08	-9.62732	2.04538e-23	-4.50693	1.60943e-05	-4.0378	0.000167432	-5.70067	2.63001e-08	0.469127	0.798049	-1.19374	0.414782
SMAC_00509.3_t1	216.161	0.0293786	0.974052	-0.556151	0.325538	0.728768	0.105177	-0.260701	0.681693	0.193634	0.786362	0.499791	0.422276	0.454335	0.510569	0.760492	0.186089
SMAC_00510.3_t1	183.069	0.251089	0.802469	0.527314	0.421985	-0.185271	0.754489	0.257334	0.730083	0.0640192	0.941671	0.302617	0.715928	-0.193315	0.836483	0.0452832	0.963098
SMAC_00511.3_t1	94.0289	0.559316	0.351391	0.359265	0.487184	1.06691	0.00488677	0.147795	0.805819	0.493631	0.330864	0.0393036	0.95984	0.345836	0.584339	-0.108492	0.886316
SMAC_00512.3_t1	592.471	-0.377792	0.733213	0.173772	0.84048	1.36193	0.0208521	-0.0943852	0.922912	-0.679212	0.392514	-0.738348	0.362883	-0.584827	0.528273	-0.643963	0.455378
SMAC_00513.3_t1	439.157	0.208275	0.73856	0.597983	0.13874	0.9276	0.00441207	-0.295046	0.505267	-0.290663	0.53312	-0.090296	0.880289	0.00438265	0.99492	0.20475	0.711565
SMAC_00514.3_t1	1926.85	-1.23121	0.0562363	-0.891249	0.136167	-2.11173	9.07598e-06	0.537481	0.389594	0.251957	0.744668	0.455502	0.526963	-0.285523	0.738858	-0.0819785	0.932449
SMAC_00515.3_t1	1093	-0.253893	0.74794	-0.698223	0.174547	-0.830083	0.0504347	-0.154839	0.810361	-0.11557	0.872406	0.217582	0.75828	0.0392688	0.962416	0.372421	0.55667
SMAC_00516.3_t1	77.8656	0.307522	0.747432	0.0712385	0.926139	0.826908	0.106852	-1.35923	0.0186515	-0.610371	0.37122	-1.22928	0.0587354	0.748863	0.322562	0.129951	0.903801
SMAC_00517.3_t1	505.456	-0.0734117	0.892464	0.0460593	0.907072	0.712602	0.00512974	-0.0660505	0.87394	-0.228765	0.529474	-0.140053	0.750589	-0.162715	0.71997	-0.0740028	0.878617
SMAC_00518.3_t1	499.057	-1.35008	0.00227332	-0.668518	0.145378	1.1937	0.00105158	-0.298698	0.555589	-1.49599	0.000150177	-0.351975	0.523259	-1.19729	0.00555406	-0.053277	0.944388
SMAC_00519.3_t1	278.767	-0.233528	0.663171	0.0730823	0.867979	-0.276388	0.390878	-0.286749	0.458854	-0.363599	0.355856	0.452056	0.243646	-0.0768498	0.894142	0.738805	0.0365853
SMAC_00520.3_t1	29.8397	-1.32888	0.0790004	-1.00736	0.134997	-1.73111	0.00215336	0.0639553	0.939695	-0.819516	0.223921	-1.02845	0.153132	-0.883472	0.224405	-1.09241	0.134645
SMAC_00521.3_t1	37.004	-0.660908	0.515208	-0.801454	0.307607	-0.667219	0.304875	0.492443	0.534123	-0.116789	0.909969	-0.512897	0.588315	-0.609232	0.511026	-1.00534	0.220948
SMAC_00522.3_t1	111.261	0.398528	0.736436	0.357687	0.688488	3.68258	1.91446e-10	1.99627	0.00205597	-0.0148755	0.988619	0.156343	0.895505	-2.01114	0.0041217	-1.83992	0.0106862
SMAC_00523.3_t1	10.357	-2.00479	0.257779	-0.370287	0.81364	-4.79976	0.00997009	1.29536	0.307692	-0.495079	0.77085	-3.09382	0.0905682	-1.79044	0.200649	-4.38919	0.00946981
SMAC_00524.3_t1	949.259	0.096728	0.898749	0.73633	0.0909384	1.59515	4.16298e-06	0.846013	0.0345941	1.46951	8.44133e-05	0.779848	0.0722987	0.6235	0.191092	-0.0661649	0.924761
SMAC_00525.3_t1	84.8426	0.313065	0.696859	-0.0773009	0.908156	0.363695	0.444096	0.897304	0.0648713	0.521584	0.361824	-0.17996	0.821107	-0.375719	0.587442	-1.07726	0.0447307
SMAC_00526.3_t1	404.429	0.291004	0.680328	-0.328411	0.525334	1.96094	9.69951e-08	0.582153	0.208039	0.99084	0.0228665	-0.530533	0.32215	0.408688	0.489507	-1.11269	0.0138518
SMAC_00527.3_t1	107.861	0.0666515	0.960014	-0.15482	0.866542	-0.311603	0.65997	1.79236	0.00588091	0.670427	0.41708	1.10731	0.149476	-1.12193	0.154721	-0.685048	0.433853
SMAC_00528.3_t1	6.05297	0.417153	0.878786	-0.851046	0.687901	1.59134	0.218348	2.5963	0.0553461	0.656223	0.742658	-0.241558	0.931541	-1.94008	0.225947	-2.83786	0.104259
SMAC_00529.3_t1	251.477	3.17288	0.0266898	2.48124	0.0699306	-1.21023	0.324489	-0.0600235	0.972921	-1.2756	0.41114	-1.40016	0.380433	-1.21557	0.492832	-1.34014	0.420398
SMAC_00530.3_t1	682.356	0.742691	0.112705	0.344053	0.438994	0.973997	0.00378697	-0.643409	0.104946	-0.8704	0.0261814	0.00789026	0.989405	-0.226991	0.702891	0.6513	0.135949
SMAC_00531.3_t1	49.1903	-1.84127	0.0771161	-2.65396	0.00472753	-8.8895	1.19688e-07	0.234088	0.843113	-0.18446	0.887471	-0.939024	0.373996	-0.418548	0.749909	-1.17311	0.252241
SMAC_00532.3_t1	2822.09	3.45339	0.062738	4.2414	0.00996284	-0.111081	0.947555	0.857284	0.669102	1.58517	0.402996	2.6179	0.133612	0.727888	0.770242	1.76062	0.372435
SMAC_00533.3_t1	20149.9	5.79733	0.0129796	6.84879	0.00170657	0.12096	0.958094	0.816948	0.778164	1.5107	0.58364	3.33614	0.166188	0.693751	0.844084	2.51919	0.340915
SMAC_00534.3_t1	319.33	0.331891	0.492183	0.192087	0.638219	-0.466825	0.128221	-0.700342	0.0354629	0.0891835	0.859782	-0.140977	0.783607	0.789525	0.027106	0.559365	0.149435
SMAC_00535.3_t1	744.318	-0.0998524	0.891532	-0.160676	0.749994	-0.117117	0.775392	-0.164435	0.752928	0.0334185	0.957141	0.380719	0.443664	0.197854	0.746518	0.545154	0.239682
SMAC_00536.3_t1	15.3797	-0.0808311	0.957882	-0.263015	0.802526	-1.10194	0.151105	-0.615176	0.518231	-0.516027	0.617632	-0.9364	0.383861	0.0991494	0.946083	-0.321224	0.818681
SMAC_00537.3_t1	1144.56	-0.472611	0.191798	-0.298486	0.350652	0.165286	0.556617	-0.937598	0.000352678	-0.860086	0.00143936	-0.83241	0.0025783	0.077512	0.871991	0.105188	0.813078
SMAC_00538.3_t1	1001.51	-0.229629	0.748253	-0.580623	0.216565	1.53537	2.7804e-05	-1.10667	0.00696135	-0.769345	0.0902865	-0.746252	0.111518	0.337321	0.585297	0.360414	0.531159
SMAC_00539.3_t1	5028.37	0.145638	0.650942	0.0247569	0.927554	-1.01461	5.38765e-09	-0.202478	0.379621	0.357281	0.101094	0.073516	0.816018	0.559759	0.00712003	0.275994	0.254369
SMAC_00540.3_t1	131.106	0.741511	0.279905	-0.33347	0.600799	2.2062	3.8077e-07	-2.50694	1.36288e-06	-1.29843	0.0150793	-1.91022	0.00064785	1.20851	0.0657316	0.596715	0.482412
SMAC_00541.3_t1	1603.5	0.97986	0.00807682	1.02601	0.00386389	1.76481	1.61883e-09	-0.220575	0.607826	-0.186621	0.689956	-1.05534	0.00177055	0.0339535	0.956666	-0.834762	0.0209254
SMAC_00542.3_t1	1602.64	-0.176498	0.821274	-0.0421884	0.943188	2.2379	2.11672e-09	-1.34638	0.00115558	-1.92307	1.68266e-06	-1.99758	7.50067e-07	-0.576686	0.299065	-0.651202	0.212892
SMAC_00543.3_t1	328.027	-1.15441	0.147294	-0.0859598	0.918851	3.28633	4.46789e-10	-2.02595	0.000817049	-0.724379	0.325988	0.221968	0.820899	1.30157	0.0717186	2.24792	0.000294544
SMAC_00544.3_t1	1115.34	-0.357083	0.641371	-1.18385	0.0220727	-0.0446138	0.932343	-0.535114	0.324291	-0.653435	0.237995	-0.940561	0.0732314	-0.118322	0.887087	-0.405447	0.536563
SMAC_00545.3_t1	375.638	0.350078	0.58914	-0.264617	0.610888	0.955111	0.0108712	-0.775501	0.0749519	-0.527926	0.28247	-1.14873	0.00808588	0.247574	0.707842	-0.373229	0.527005
SMAC_00546.3_t1	636.618	0.88925	0.00032452	0.403733	0.135331	-0.131447	0.600947	-0.179484	0.552142	0.280776	0.33374	-0.250267	0.435298	0.46026	0.102287	-0.0707835	0.863058
SMAC_00547.3_t1	438.191	0.505068	0.193954	0.171796	0.648509	0.584159	0.0309935	-0.0319025	0.942358	1.04739	0.000187614	0.754748	0.0138065	1.07929	0.000220067	0.78665	0.0114404
SMAC_00549.3_t1	1014.12	1.20694	0.00291895	0.158028	0.752757	2.07406	2.83279e-10	-1.06843	0.00427094	0.588618	0.170269	-1.09532	0.00491346	1.65705	5.79617e-06	-0.0268864	0.96929
SMAC_00550.3_t1	1508.79	0.455128	0.403784	-0.198998	0.68335	0.372996	0.310637	-0.0284707	0.957152	0.986238	0.00986736	0.204976	0.715928	1.01471	0.0112477	0.233446	0.673178
SMAC_00551.3_t1	296.039	-0.159244	0.830566	-0.146412	0.789653	-0.774767	0.0408745	-0.549933	0.222114	0.283131	0.598886	0.106916	0.873946	0.833064	0.0727858	0.656848	0.175416
SMAC_00552.3_t1	110.379	0.495145	0.503371	0.707269	0.200663	-0.456314	0.352982	-0.717511	0.189076	0.122071	0.87424	-0.146204	0.859408	0.839582	0.164058	0.571308	0.393879
SMAC_00553.3_t1	133.502	0.146046	0.826058	-0.138917	0.777758	-1.09233	0.00119021	-1.57826	8.58429e-06	-1.30505	0.000302539	-1.80731	1.98157e-06	0.273211	0.65234	-0.229052	0.720001
SMAC_00554.3_t1	315.94	-0.476761	0.536089	-1.11003	0.0464478	-1.66237	0.000267604	-0.689264	0.214579	0.179861	0.811641	0.239509	0.75855	0.869125	0.148043	0.928773	0.10679
SMAC_00555.3_t1	2039.68	0.702334	0.0412935	0.717266	0.0233808	0.414795	0.131235	-0.00848166	0.982909	-0.0766434	0.867407	-0.0246869	0.961412	-0.0681617	0.894662	-0.0162052	0.9755
SMAC_00556.3_t1	4871.84	0.852424	0.320591	2.48828	3.39549e-05	9.89303	2.06834e-87	-1.06548	0.127442	-0.645888	0.412306	0.207021	0.840864	0.41959	0.693208	1.2725	0.0976444
SMAC_00557.3_t1	1397.51	-0.130508	0.842321	0.217668	0.627661	0.258481	0.472544	0.0671343	0.899989	0.594326	0.136333	0.0745712	0.903456	0.527192	0.232647	0.00743697	0.989505
SMAC_00558.3_t1	4.13759	-0.254486	NA	-1.04268	0.730582	-2.11064	0.368629	-3.31987	0.241955	-5.79549	0.0538781	-0.443758	NA	-2.47562	NA	2.87611	0.393808
SMAC_00559.3_t1	60.7933	-0.90192	0.293932	-1.81041	0.0100998	-5.24423	1.08744e-08	0.292539	0.71614	1.17525	0.0669497	-1.44352	0.0407235	0.882716	0.23245	-1.73606	0.0115524
SMAC_00560.3_t1	246.076	-0.343913	0.595282	0.0847009	0.879394	0.0863096	0.846924	2.08481	4.5508e-09	1.57055	2.48775e-05	1.67777	6.67348e-06	-0.514261	0.299748	-0.407042	0.427973
SMAC_00561.3_t1	108.687	1.44417	0.0487347	1.09887	0.108783	0.83703	0.152759	1.65496	0.00578362	1.81315	0.00263366	1.33437	0.045174	0.158191	0.879843	-0.320591	0.726703
SMAC_00562.3_t1	10307.1	-0.541597	0.343893	0.107877	0.843537	0.201436	0.63542	0.538241	0.233854	-0.373652	0.464186	-0.454365	0.37646	-0.911893	0.0443728	-0.992606	0.0212948
SMAC_00563.3_t1	531.708	0.581962	0.171178	0.42702	0.254947	0.332501	0.298814	-0.244735	0.549731	-0.157962	0.73933	-0.488245	0.218117	0.0867728	0.880297	-0.24351	0.609381
SMAC_00564.3_t1	25.2101	-0.118594	0.94075	0.716034	0.427512	-2.30224	0.00737302	0.447564	0.647306	0.876366	0.32765	1.14332	0.200083	0.428802	0.718772	0.695754	0.502217
SMAC_00565.3_t1	115.084	-0.933205	0.260394	-0.698015	0.323003	-5.51685	3.76461e-15	-1.43455	0.0197542	-1.19532	0.0696263	-0.710572	0.354522	0.239235	0.816182	0.723979	0.366208
SMAC_00566.3_t1	222.771	-0.57777	0.327986	-0.849089	0.069441	-1.31365	0.000550787	-3.69232	1.90327e-20	-3.12771	1.45933e-15	-3.17328	1.28872e-14	0.564613	0.368343	0.519042	0.426284
SMAC_00567.3_t1	160.839	-1.34357	0.167374	-1.19766	0.155238	-6.8674	3.83173e-12	0.366006	0.711941	0.297034	0.788012	-0.891723	0.340538	-0.0689723	0.960121	-1.25773	0.149764
SMAC_00568.3_t1	100.082	-0.246002	0.80535	-1.42938	0.0219091	-1.6673	0.00120752	0.170972	0.827613	0.536434	0.427099	-0.154993	0.864849	0.365463	0.664286	-0.325965	0.695911
SMAC_00569.3_t1	68.0808	-2.17693	0.0104339	-0.455036	0.612552	-5.69395	1.02255e-07	1.58996	0.024542	-0.348925	0.732886	-1.07114	0.223749	-1.93888	0.00952641	-2.6611	0.000210058
SMAC_00570.3_t1	152.478	-0.00356146	0.996628	-0.307592	0.64233	-1.46586	0.0021855	-1.96325	0.000100114	-1.1747	0.0336878	-3.16064	3.98259e-09	0.788544	0.242153	-1.19739	0.0744119
SMAC_00571.3_t1	1152.63	-0.448156	0.350929	-0.690854	0.0663872	-3.02213	3.27749e-24	-2.06552	1.86437e-11	-1.14442	0.000543303	-2.30205	1.04309e-13	0.921108	0.0121228	-0.23653	0.636311
SMAC_00572.3_t1	187.49	-0.397742	0.420005	0.0926853	0.834324	-1.44329	6.43612e-06	1.87252	2.91485e-11	1.24002	3.59341e-05	1.21401	8.51289e-05	-0.632509	0.070857	-0.658518	0.057216
SMAC_00573.3_t1	1059.64	-0.636106	0.102248	-0.0599009	0.888608	0.98838	0.000338074	0.239725	0.528141	-0.211879	0.609284	0.435203	0.24	-0.451603	0.241935	0.195478	0.666388
SMAC_00574.3_t1	0.650605	2.22168	NA	2.89803	NA	0.660856	0.898125	1.95719	0.754288	3.78789	0.48928	3.60235	NA	1.8307	NA	1.64516	0.815054
SMAC_00575.3_t1	1.13467	2.23533	NA	3.83785	NA	4.69696	0.121312	3.4675	0.366381	0.429725	0.939521	3.83205	NA	-3.03777	NA	0.364547	0.946558
SMAC_00576.3_t1	0.886747	2.21926	NA	2.20951	NA	0.660855	0.905742	5.13618	0.32941	3.53034	0.56093	1.37942	NA	-1.60584	NA	-3.75675	0.55466
SMAC_00577.3_t1	1226.79	-0.147458	0.756326	-0.358782	0.251735	-0.652214	0.00895399	-2.45759	5.57804e-24	-1.19184	3.53623e-06	-1.46198	8.66905e-09	1.26575	2.09881e-06	0.995614	0.000340164
SMAC_00578.3_t1	6.28659	-0.0165112	0.996373	-0.268383	0.905078	-2.31245	0.275982	3.0373	0.0280129	2.37304	0.120469	0.338144	0.902001	-0.664262	0.740471	-2.69916	0.115353
SMAC_00579.3_t1	4.2884	-0.49626	NA	-0.712861	0.703088	0.585485	0.666168	-0.720651	0.697317	0.336344	0.869441	-0.155976	NA	1.05699	NA	0.564675	0.816623
SMAC_00580.3_t1	8.27673	-0.00217043	0.999022	-0.165466	0.903394	-0.7796	0.442838	0.137638	0.923459	-1.32145	0.284077	-0.49522	0.761221	-1.45909	0.274505	-0.632858	0.690275
SMAC_00581.3_t1	5.0505	-2.87702	0.383317	0.449353	0.849642	-3.08518	0.158581	3.5701	0.0217799	2.73726	0.113593	1.24191	0.606166	-0.832843	0.699885	-2.32819	0.212401
SMAC_00582.3_t1	17.7346	0.590311	0.774214	1.0908	0.415998	-2.68024	0.158527	4.0314	2.5819e-05	2.98159	0.00390877	3.35642	0.00111205	-1.04981	0.375696	-0.674976	0.597385
SMAC_00583.3_t1	12.1117	-2.0479	0.21452	0.313915	0.823279	-6.11118	0.000631552	1.09104	0.352007	-0.652596	0.654087	0.648111	0.668394	-1.74364	0.170347	-0.442929	0.786972
SMAC_00584.3_t1	4.24617	-2.38237	NA	0.179618	0.939912	-5.02975	0.0222208	1.24439	0.553084	-1.3283	0.578778	-4.31117	NA	-2.57269	NA	-5.55557	0.0291855
SMAC_00585.3_t1	7.30606	0.207399	0.940923	0.183604	0.923723	-4.57572	0.0193674	2.17532	0.107978	1.52958	0.323634	-0.119823	0.962455	-0.64574	0.742635	-2.29515	0.167712
SMAC_00586.3_t1	5.58524	-1.6258	0.531723	-1.3501	0.494182	-4.37137	0.0254102	1.98503	0.14817	2.11739	0.136986	-1.22022	0.618615	0.132366	0.953699	-3.20525	0.0937513
SMAC_00587.3_t1	3.84186	0.469029	NA	0.986237	0.57882	-4.59529	0.0231879	-0.887294	0.663521	-1.08363	0.606387	-0.361632	NA	-0.196335	NA	0.525661	0.849409
SMAC_00588.3_t1	15.8172	0.564172	0.781177	1.59057	0.198708	-4.68464	0.0108135	3.72753	0.000168204	2.04171	0.0783442	0.0598432	0.977432	-1.68582	0.148369	-3.66769	0.00194884
SMAC_00589.3_t1	1.25669	0.198988	NA	-1.40704	NA	-1.64607	0.69945	2.35903	0.621412	1.78304	0.742142	2.27989	NA	-0.575994	NA	-0.0791424	0.989094
SMAC_00590.3_t1	0.490719	-0.402888	NA	-0.112913	NA	-2.32137	0.687193	0.145325	0.983889	-2.5525	0.747658	-1.6028	NA	-2.69782	NA	-1.74813	0.843566
SMAC_00591.3_t1	7.59328	0.335932	0.878959	1.42576	0.26379	-5.02815	0.0063833	-1.36	0.37259	1.22891	0.361332	0.552049	0.764741	2.58891	0.0778673	1.91205	0.246253
SMAC_00592.3_t1	34.8981	-1.29238	0.273732	-0.602672	0.559847	-8.0039	2.13516e-06	-0.980377	0.308083	-0.193814	0.882284	0.862871	0.417664	0.786563	0.519241	1.84325	0.0457654
SMAC_00593.3_t1	81.6052	-5.69911	0.00137791	-3.48202	0.000193469	-3.30678	9.60219e-06	3.97549	8.29587e-23	1.37188	0.00401268	-4.19473	0.00109798	-2.60362	1.82488e-10	-8.17022	2.53324e-12
SMAC_00594.3_t1	28.9965	-4.65742	0.0180122	-4.64786	0.0102869	-1.15343	0.11912	3.33333	5.26542e-09	1.34546	0.0529155	-4.13993	0.0257171	-1.98787	0.00124891	-7.47325	6.14599e-06
SMAC_00595.3_t1	61.6103	0.980413	0.136491	-2.2089	0.000340682	0.0335892	0.953674	-0.81127	0.16196	-0.664729	0.29288	-2.44954	8.84352e-05	0.146541	0.878603	-1.63827	0.0202799
SMAC_00597.3_t1	1024.9	0.696494	0.130868	0.1309	0.789538	-0.0129775	0.97508	0.329948	0.445617	0.449359	0.29889	0.126132	0.830781	0.119411	0.846715	-0.203816	0.70998
SMAC_00598.3_t1	43.4127	0.248122	0.771497	-0.566071	0.343306	-0.016777	0.975955	0.339012	0.572729	0.326405	0.609282	-0.318666	0.674754	-0.0126069	0.987604	-0.657678	0.3224
SMAC_00599.3_t1	93.6661	1.06872	0.0587156	-0.0558929	0.932427	-1.44031	0.00152209	0.64025	0.215927	-0.317594	0.621862	-1.23262	0.0251506	-0.957844	0.0784618	-1.87287	0.000232332
SMAC_00600.3_t1	488.84	-2.62469	5.07695e-09	-2.09705	6.34923e-06	-7.07279	2.07919e-27	2.05392	9.17473e-07	-1.18081	0.0117679	-1.12955	0.0198867	-3.23472	3.36564e-15	-3.18346	1.28291e-14
SMAC_00601.3_t1	155.001	0.261756	0.682582	0.106507	0.836284	0.247806	0.523925	-0.0531846	0.927256	-0.23629	0.650981	0.38955	0.437616	-0.183106	0.771832	0.442734	0.380722
SMAC_00602.3_t1	1450.11	-0.0299507	0.964411	-0.46286	0.250731	-0.461945	0.169004	0.682558	0.0615944	0.211884	0.66026	0.18325	0.730858	-0.470674	0.295456	-0.499309	0.242788
SMAC_00603.3_t1	602.381	-0.500969	0.443913	-0.79062	0.111294	-0.555235	0.192398	0.322828	0.559352	0.166784	0.803265	-0.0131956	0.986283	-0.156044	0.835	-0.336024	0.591585
SMAC_00604.3_t1	2914.49	0.0290163	0.953764	0.401469	0.141278	1.15356	7.03593e-08	-0.240234	0.402673	-0.719917	0.00302747	-0.444224	0.106637	-0.479683	0.0884116	-0.20399	0.549682
SMAC_00605.3_t1	1687.74	0.406204	0.362354	0.727773	0.033993	1.3909	4.95089e-07	-0.232238	0.553126	-0.701592	0.0347397	-0.549675	0.12739	-0.469354	0.231862	-0.317437	0.453024
SMAC_00606.3_t1	233.527	0.219693	0.705946	0.505073	0.188985	0.681501	0.0286375	-0.00127001	0.997862	-0.0738891	0.892209	0.280627	0.552419	-0.0726191	0.907797	0.281897	0.561033
SMAC_00607.3_t1	6587.92	0.0257253	0.955876	-0.0691928	0.824848	-0.366436	0.0928588	-0.252992	0.345384	0.0131796	0.971242	-0.26762	0.359632	0.266172	0.391645	-0.0146276	0.971773
SMAC_00608.3_t1	1360.61	-0.373986	0.185607	-0.356208	0.13981	-0.48981	0.01267	-0.784305	0.000118378	-0.585209	0.00698739	-0.504457	0.0277513	0.199096	0.522249	0.279848	0.306523
SMAC_00609.3_t1	831.437	-0.399825	0.520813	-0.756179	0.0972885	-0.812185	0.0320116	-0.0829555	0.892613	-0.259887	0.641014	-0.134094	0.840472	-0.176931	0.792848	-0.051138	0.946017
SMAC_00610.3_t1	1234.65	-0.527933	0.320591	-0.945509	0.0221528	-1.3088	0.00011503	-0.488546	0.248551	-0.31191	0.520662	0.17521	0.766172	0.176636	0.774759	0.663755	0.129454
SMAC_00611.3_t1	3310.25	0.52017	0.413572	0.803969	0.0979588	0.463378	0.277427	0.188362	0.754209	0.548721	0.29246	0.127133	0.859408	0.360359	0.577068	-0.0612287	0.939137
SMAC_00612.3_t1	2264.13	-1.68226	1.61906e-10	-0.803183	0.00765368	-10.0411	2.02419e-69	-0.702587	0.0120267	-0.560079	0.0641546	-0.636249	0.0334003	0.142507	0.752976	0.0663376	0.890072
SMAC_00612.3_t2	0	NA	NA	NA	NA	NA	NA	NA	NA	NA	NA	NA	NA	NA	NA	NA	NA
SMAC_00613.3_t1	632.864	-0.0162271	0.979005	-0.216261	0.609043	0.381495	0.238928	0.343578	0.37955	0.355844	0.388473	0.486914	0.22406	0.0122661	0.983763	0.143336	0.787685
SMAC_00614.3_t1	1216.04	-0.0668245	0.919489	-1.0787	0.00232417	-1.37795	3.75294e-06	-0.0221976	0.962539	0.100259	0.847137	-0.0200915	0.972076	0.122456	0.825855	0.00210612	0.996832
SMAC_00615.3_t1	1087.99	-0.0910243	0.887834	-0.594056	0.114229	-0.129444	0.715901	-0.470207	0.204536	-0.268143	0.537564	-0.431534	0.298764	0.202064	0.70412	0.0386726	0.949031
SMAC_00616.3_t1	5297.9	0.0836487	0.89971	-0.623673	0.103402	-0.497552	0.126606	-0.239837	0.582229	0.489689	0.220181	0.321524	0.480262	0.729526	0.0608846	0.561361	0.163927
SMAC_00617.3_t1	29.8516	1.34929	0.117664	0.989347	0.205316	-2.74384	0.00103968	0.0993389	0.925825	0.362191	0.712677	0.06999	0.956506	0.262852	0.82222	-0.0293488	0.98109
SMAC_00618.3_t1	83.4132	-0.460557	0.723761	-0.146981	0.888211	-7.04597	2.20444e-08	-3.88591	5.88341e-07	-1.44299	0.084125	0.519113	0.626742	2.44292	0.00660099	4.40502	1.77948e-08
SMAC_00619.3_t1	2195.5	-0.101655	0.842321	0.0953561	0.799723	0.0760353	0.801643	-0.0291314	0.944237	-0.0814975	0.851324	0.20983	0.586559	-0.0523661	0.918297	0.238961	0.533013
SMAC_00620.3_t1	2359.71	-0.406319	0.421548	0.054364	0.909477	0.16814	0.643033	-0.337576	0.409601	-0.893873	0.0118176	-0.743683	0.0479067	-0.556297	0.189412	-0.406107	0.365451
SMAC_00621.3_t1	438.23	-0.791399	0.028644	-0.757717	0.0258733	0.639589	0.0211931	0.484341	0.134583	0.73376	0.0183849	0.769381	0.0148034	0.24942	0.574627	0.28504	0.490136
SMAC_00622.3_t1	713.869	0.446096	0.375489	0.295677	0.485938	0.862052	0.00693757	-0.396873	0.327186	-0.300761	0.504011	-0.222122	0.665432	0.0961124	0.877293	0.174751	0.748164
SMAC_00623.3_t1	542.295	0.215668	0.782364	0.547515	0.280993	0.906866	0.0251717	0.619487	0.199741	-0.0105007	0.98747	-0.121542	0.867832	-0.629987	0.255418	-0.741029	0.152754
SMAC_00624.3_t1	110.242	0.599359	0.297174	0.816293	0.0737101	1.49081	2.80848e-05	1.40117	0.000232221	1.36424	0.00041978	1.78475	2.35007e-06	-0.0369311	0.959493	0.383574	0.467902
SMAC_00625.3_t1	20907.2	0.113153	0.849636	0.418489	0.259257	0.942903	0.00124297	-0.928467	0.00341722	-1.23537	6.58901e-05	-1.18177	0.000150614	-0.306899	0.50714	-0.253305	0.577399
SMAC_00626.3_t1	5829.76	0.424893	0.517445	0.982125	0.0381959	0.995929	0.0118332	0.238246	0.675597	-0.401058	0.459621	-0.58196	0.268134	-0.639303	0.235437	-0.820205	0.0942136
SMAC_00627.3_t1	1287	0.494145	0.12567	0.466867	0.0982059	1.2485	1.99578e-08	-0.0336805	0.930101	-0.265463	0.400018	0.0115758	0.978894	-0.231782	0.529193	0.0452563	0.92047
SMAC_00628.3_t1	2120.73	0.105426	0.875935	0.690168	0.0795752	-0.49646	0.141755	-0.914356	0.00992676	-0.682607	0.0786746	-0.498165	0.244143	0.231748	0.677423	0.416191	0.366761
SMAC_00629.3_t1	272.383	0.0656662	0.950199	0.546283	0.349012	0.291936	0.572	0.351767	0.577208	-0.232196	0.750274	0.373564	0.593313	-0.583962	0.382458	0.0217978	0.980598
SMAC_00629.3_t2	0	NA	NA	NA	NA	NA	NA	NA	NA	NA	NA	NA	NA	NA	NA	NA	NA
SMAC_00630.3_t1	3465.78	0.387036	0.334998	0.533343	0.0921212	2.12506	5.8364e-18	-0.0413756	0.9238	-0.497563	0.118362	-0.47338	0.151774	-0.456187	0.192204	-0.432004	0.209457
SMAC_00631.3_t1	4303.49	-0.122558	0.836969	-0.643627	0.0744408	-1.1939	3.96706e-05	0.0609654	0.900848	0.121004	0.806134	0.190359	0.690772	0.0600386	0.92031	0.129394	0.801988
SMAC_00632.3_t1	1031.71	-0.262606	0.530268	0.0341943	0.927808	-0.0378653	0.903589	-0.419948	0.15677	-0.312775	0.347156	0.102362	0.815829	0.107173	0.814758	0.52231	0.0944384
SMAC_00633.3_t1	2248.22	0.238763	0.608623	0.363548	0.281729	1.17074	6.62478e-06	-0.245542	0.491414	-0.405706	0.236936	-0.53858	0.104352	-0.160163	0.733796	-0.293038	0.45878
SMAC_00634.3_t1	1678.15	-0.213726	0.653301	-0.546997	0.0909126	0.202471	0.492603	-1.11028	5.29587e-05	-1.04093	0.000208661	-0.969101	0.000740948	0.0693464	0.893459	0.141177	0.753495
SMAC_00635.3_t1	781.796	0.0613679	0.935672	0.112525	0.821411	1.34935	3.86275e-05	-0.26739	0.564318	0.0034061	0.996252	0.262677	0.615708	0.270796	0.631513	0.530067	0.241291
SMAC_00636.3_t1	0.592946	-0.699681	NA	-0.668812	NA	2.85402	0.632899	-1.01668	0.909433	-1.13897	0.904368	2.012	NA	-0.12229	NA	3.02868	0.731963
SMAC_00637.3_t1	26758.5	0.567629	0.130592	-0.301537	0.386406	1.26671	1.23557e-06	-1.4385	1.06102e-07	-0.73615	0.0155139	-1.3989	3.19922e-07	0.702348	0.0306094	0.0395981	0.941677
SMAC_00638.3_t1	1791.63	0.291661	0.578115	0.379464	0.331603	1.77546	1.50291e-09	0.209369	0.628018	0.362523	0.379626	-0.607315	0.112364	0.153154	0.780604	-0.816684	0.0235697
SMAC_00639.3_t1	1360.24	-0.230006	0.687248	-0.813447	0.0292275	-1.84211	9.26738e-10	-0.0944485	0.848387	0.225427	0.623278	0.386768	0.365694	0.319875	0.510692	0.481216	0.24564
SMAC_00640.3_t1	11769.8	0.473994	0.324753	0.875897	0.0189729	1.07236	0.000508673	-0.809642	0.0194325	-0.73029	0.0462006	-0.613134	0.114733	0.0793521	0.896728	0.196508	0.7037
SMAC_00641.3_t1	3183.67	0.679694	0.118045	0.24458	0.562488	1.13504	0.000230083	-1.19538	0.000282591	-0.81997	0.0221615	-1.61062	5.90249e-07	0.375412	0.426604	-0.41524	0.350974
SMAC_00642.3_t1	934.313	-0.35083	0.60513	-0.716825	0.13508	0.307036	0.477165	0.652498	0.156365	0.376999	0.484478	0.517861	0.329435	-0.275499	0.678094	-0.134637	0.845242
SMAC_00643.3_t1	1006.84	-0.804706	0.07625	-0.991617	0.0133508	-2.24073	5.90372e-12	0.0662909	0.904484	-0.428496	0.336418	-0.612557	0.150473	-0.494787	0.295456	-0.678848	0.108079
SMAC_00644.3_t1	973.162	3.11609	1.99912e-15	0.111986	0.847617	2.44346	7.05451e-11	0.21688	0.707557	2.14561	5.41264e-08	0.16035	0.818299	1.92874	2.54812e-06	-0.0565299	0.944388
SMAC_00645.3_t1	1025.97	-0.546052	0.487968	-1.33323	0.0197242	-1.44067	0.00245354	-0.202632	0.781262	-0.094402	0.909969	0.619445	0.343608	0.10823	0.909742	0.822077	0.184857
SMAC_00646.3_t1	1572.48	0.273476	0.608623	0.799199	0.029295	0.788963	0.00998393	-0.2601	0.530939	-0.281977	0.512716	-0.0010874	0.99805	-0.0218766	0.972365	0.259013	0.584981
SMAC_00647.3_t1	106.549	-0.429536	0.457259	-0.939348	0.0329667	-0.399388	0.289695	0.426252	0.320499	0.156231	0.779749	0.344348	0.504434	-0.270022	0.640498	-0.081904	0.902633
SMAC_00648.3_t1	186.898	-1.00281	0.216878	-1.46692	0.0283083	-2.05519	0.000188286	-1.43105	0.0197642	-1.33192	0.0385146	-0.0801259	0.940083	0.0991395	0.92932	1.35093	0.0423892
SMAC_00649.3_t1	665.157	-1.42356	0.0299049	-1.30554	0.0338965	-3.62539	3.2701e-13	-0.889046	0.140588	-0.838696	0.193806	-0.482097	0.523624	0.0503499	0.961197	0.406949	0.609981
SMAC_00650.3_t1	126.251	-0.204227	0.806346	0.349647	0.528568	-1.66816	0.00010443	-0.721585	0.149002	-0.825204	0.108451	0.532818	0.355635	-0.103619	0.903068	1.2544	0.00999789
SMAC_00651.3_t1	806.238	0.270827	0.638747	0.243269	0.582849	1.05817	0.000959505	0.263867	0.552863	-0.288453	0.530914	-0.527464	0.219013	-0.55232	0.210135	-0.791331	0.0441617
SMAC_00652.3_t1	1943.98	0.27679	0.691336	-0.364825	0.464202	-0.341113	0.411728	-2.40826	1.61779e-10	-2.13408	2.47865e-08	-2.34436	8.20082e-10	0.27418	0.674334	0.0638917	0.933455
SMAC_00652.3_t2	0	NA	NA	NA	NA	NA	NA	NA	NA	NA	NA	NA	NA	NA	NA	NA	NA
SMAC_00653.3_t1	3012.93	-0.0093729	0.990397	-0.815965	0.0679111	-3.10146	8.97392e-19	-3.18882	4.79359e-19	-2.89087	1.32541e-15	-2.90126	1.00002e-15	0.297949	0.630823	0.287561	0.619849
SMAC_00654.3_t1	512.575	0.956112	3.97486e-05	0.223613	0.425041	-0.207636	0.375792	0.672745	0.00290706	0.960388	9.70391e-06	0.295056	0.316141	0.287643	0.33745	-0.377689	0.176633
SMAC_00655.3_t1	835.534	0.112789	0.849636	-0.138502	0.746163	0.393489	0.203333	0.275808	0.478855	0.582377	0.101094	0.181812	0.705512	0.306568	0.503346	-0.0939967	0.859556
SMAC_00656.3_t1	2329.81	0.109102	0.841015	0.709489	0.0278155	0.865483	0.0011446	0.0429738	0.923469	-0.30138	0.412306	0.0850505	0.861247	-0.344354	0.382681	0.0420766	0.938129
SMAC_00657.3_t1	1377.73	-0.198023	0.800335	-0.693705	0.154676	-0.446539	0.290891	-0.118456	0.850351	-0.124655	0.854725	0.180301	0.792092	-0.00619874	0.993761	0.298757	0.628054
SMAC_00658.3_t1	88.4303	-1.22526	0.265187	-2.05265	0.0219283	-2.13941	0.00392871	-0.30207	0.785801	-0.46643	0.671513	0.264023	0.837782	-0.16436	0.909852	0.566093	0.618291
SMAC_00659.3_t1	529.492	0.189767	0.638709	0.562395	0.0391115	0.799849	0.000304013	-0.240769	0.417203	0.0509923	0.899524	0.708667	0.00505069	0.291761	0.385436	0.949435	0.000112555
SMAC_00660.3_t1	1033.92	-0.278024	0.73825	-0.758953	0.162701	-1.06146	0.0164893	-0.267237	0.672219	-0.0824984	0.914123	0.633356	0.27958	0.184738	0.818341	0.900592	0.099071
SMAC_00661.3_t1	1803.24	-0.0683164	0.927099	-1.09081	0.00625567	1.75964	6.83673e-08	1.02512	0.00488559	-1.09427	0.00316286	-2.5826	4.19581e-14	-2.11939	6.01436e-10	-3.60772	2.88859e-27
SMAC_00662.3_t1	916.446	0.362652	0.51896	0.0271332	0.957607	0.0645874	0.876054	0.195433	0.690418	0.319827	0.497431	0.00839425	0.989097	0.124394	0.842969	-0.187039	0.741234
SMAC_00663.3_t1	211.987	0.688722	0.153889	-0.785324	0.0695456	-4.93649	2.59488e-19	1.06516	0.00341722	1.3804	9.84432e-05	0.0633054	0.926046	0.315232	0.557182	-1.00186	0.0121803
SMAC_00664.3_t1	98.8969	-0.51164	0.50912	-0.693285	0.239319	0.898468	0.0496509	0.685553	0.206691	-0.0525946	0.947383	0.165832	0.840472	-0.738147	0.232618	-0.519721	0.439237
SMAC_00665.3_t1	233.426	-0.52738	0.315914	-0.132619	0.79188	-0.290267	0.437653	-0.629195	0.113412	-0.842918	0.0324365	0.126676	0.834036	-0.213723	0.72506	0.755871	0.0741784
SMAC_00666.3_t1	134.251	0.31809	0.67616	0.297614	0.602714	0.439952	0.324373	-0.0113579	0.985772	-0.106242	0.883475	0.31094	0.636601	-0.0948842	0.909837	0.322298	0.627815
SMAC_00667.3_t1	93.5162	0.137611	0.888004	-0.0199062	0.97745	0.416114	0.408676	0.728757	0.181746	0.0684647	0.930243	0.4346	0.530729	-0.660292	0.309629	-0.294157	0.701204
SMAC_00668.3_t1	33.5327	0.107388	0.953644	-1.36963	0.209434	0.229062	0.814256	0.867367	0.40047	1.12578	0.275362	1.1621	0.28015	0.258416	0.86224	0.294734	0.834948
SMAC_00669.3_t1	332.507	0.480997	0.525278	0.296054	0.639336	-1.88989	3.33666e-05	-0.165977	0.814389	0.390637	0.543748	0.754562	0.198539	0.556614	0.408769	0.920539	0.10588
SMAC_00670.3_t1	976.787	0.061548	0.953764	-0.532041	0.383438	0.667055	0.176792	-0.151762	0.839356	0.233742	0.756609	0.446629	0.520989	0.385504	0.623112	0.598391	0.371295
SMAC_00671.3_t1	1845.91	-0.22547	0.595566	0.100469	0.782388	1.17258	7.62794e-07	0.150359	0.669706	-0.224302	0.515971	-0.134544	0.74581	-0.374661	0.27271	-0.284903	0.425119
SMAC_00672.3_t1	368.585	0.0987391	0.873501	0.219012	0.589795	0.284596	0.379086	-0.467009	0.194705	-0.725984	0.0370468	-0.860782	0.013917	-0.258975	0.603978	-0.393774	0.371533
SMAC_00674.3_t1	375.825	-0.378489	0.432622	-1.69896	2.05186e-07	-6.59173	1.00701e-42	-1.25402	5.77732e-05	-0.0884042	0.863528	-0.967406	0.00396377	1.16562	0.000470126	0.286615	0.541235
SMAC_00675.3_t1	844.419	-0.571997	0.152479	-0.667297	0.0516418	-0.811537	0.00399771	-0.00333349	0.994127	0.295579	0.442253	0.170833	0.711352	0.298913	0.495446	0.174166	0.70958
SMAC_00676.3_t1	941.041	-0.326689	0.664581	-1.16613	0.0192955	-0.131323	0.790937	-0.531012	0.307839	-0.169546	0.806134	-0.0871686	0.914078	0.361465	0.597007	0.443843	0.470771
SMAC_00677.3_t1	966.881	0.141551	0.77079	-0.533648	0.0833953	-1.1595	2.83892e-06	0.0551133	0.894402	0.44183	0.156584	-0.153177	0.711941	0.386717	0.267744	-0.208291	0.596157
SMAC_00678.3_t1	1028.7	-0.304391	0.530268	-0.906181	0.00838504	-1.07753	0.000161866	-0.705025	0.0296894	-0.365448	0.343278	-0.388569	0.328109	0.339576	0.438689	0.316456	0.460874
SMAC_00679.3_t1	397.173	-0.195574	0.782364	-0.215026	0.678182	-1.04061	0.00441472	-0.515579	0.249607	-0.88266	0.0374191	-0.381769	0.47341	-0.367081	0.527352	0.13381	0.837452
SMAC_00680.3_t1	778.09	0.0816159	0.925062	-0.350483	0.501516	-0.39949	0.349375	-0.0799557	0.901843	0.144269	0.825785	0.290266	0.636932	0.224225	0.746518	0.370222	0.535116
SMAC_00681.3_t1	1910.93	0.392089	0.491119	0.753874	0.0718235	0.620906	0.0793956	-0.413157	0.344877	-0.465309	0.30436	-0.247389	0.649917	-0.0521513	0.94059	0.165768	0.781647
SMAC_00682.3_t1	399.752	-0.071914	0.902981	0.336316	0.340867	0.90953	0.000735465	1.00082	0.000473674	0.77996	0.0107293	0.753956	0.0172932	-0.22086	0.625048	-0.246864	0.555776
SMAC_00683.3_t1	8.77671	-0.373402	0.832441	0.313106	0.801901	-1.03589	0.295278	0.055813	0.965078	0.340802	0.801174	0.0252437	0.987963	0.284989	0.85714	-0.0305692	0.985253
SMAC_00684.3_t1	967.748	1.11164	0.0097499	0.952722	0.0240304	1.14555	0.00101654	-1.2941	0.000571507	-0.884211	0.0310229	-0.768216	0.0776104	0.409891	0.452385	0.525887	0.286684
SMAC_00685.3_t1	192.351	-1.04501	0.135552	-1.27495	0.0352579	1.34254	0.00571753	0.50776	0.423872	-0.0293022	0.972393	-0.581286	0.410641	-0.537063	0.477088	-1.08905	0.0767112
SMAC_00686.3_t1	2415.68	-0.224568	0.69128	-0.604532	0.107316	-0.847451	0.00571972	0.664333	0.0567975	0.492939	0.203244	0.514314	0.193382	-0.171395	0.751532	-0.150019	0.77473
SMAC_00688.3_t1	80.2193	0.227675	0.848801	0.0247268	0.977996	2.12042	0.000152618	1.54242	0.0143064	0.487141	0.557359	0.687353	0.40813	-1.05528	0.162167	-0.855069	0.28087
SMAC_00689.3_t1	677.825	0.150519	0.826207	0.241278	0.606946	-1.87235	2.2706e-08	-0.850961	0.0258819	-0.572136	0.183514	-0.672045	0.116479	0.278825	0.628196	0.178917	0.7596
SMAC_00690.3_t1	907.437	-0.0391461	0.964411	-0.288977	0.616854	-0.136328	0.783596	0.0431374	0.94966	0.0902997	0.902711	0.490868	0.402993	0.0471623	0.956191	0.44773	0.467808
SMAC_00691.3_t1	197.488	0.535333	0.281634	0.831386	0.0343275	1.53303	9.11331e-07	0.403397	0.328431	0.744309	0.0507852	0.82218	0.0338122	0.340912	0.503185	0.418783	0.373633
SMAC_00692.3_t1	431.337	0.487567	0.320913	0.715518	0.0635508	0.90671	0.0040733	0.597992	0.105815	0.153222	0.764756	0.0662397	0.915568	-0.444771	0.327063	-0.531753	0.210738
SMAC_00693.3_t1	1223.28	0.473751	0.274882	0.655173	0.0605709	1.23581	1.03512e-05	0.152212	0.720961	0.0629424	0.901712	0.0331874	0.951572	-0.0892697	0.871628	-0.119025	0.814953
SMAC_00694.3_t1	2091.82	0.255024	0.745683	1.02939	0.0382765	-1.29013	0.00168562	-1.58472	0.000260944	-1.85925	1.6097e-05	-1.85843	1.76235e-05	-0.274528	0.70311	-0.273711	0.6882
SMAC_00695.3_t1	4102.77	1.02011	0.00853936	1.07789	0.00370884	2.16654	1.11131e-12	2.16093	5.41769e-12	0.683019	0.0724743	1.46634	8.58788e-06	-1.47791	1.14471e-05	-0.694588	0.0748589
SMAC_00696.3_t1	344.32	-0.702257	0.34357	-0.238208	0.729869	-2.19123	3.97898e-06	0.382782	0.557139	-0.543747	0.402996	0.427863	0.549467	-0.926529	0.136307	0.0450813	0.961564
SMAC_00697.3_t1	572.306	-0.709704	0.0474881	-0.600292	0.0700941	-0.866222	0.00133578	-0.564387	0.0699822	-0.401843	0.249349	-0.269217	0.5016	0.162545	0.734729	0.29517	0.466472
SMAC_00698.3_t1	2066.84	-0.577881	0.293363	-0.753697	0.087829	-8.25647	3.40752e-57	0.543672	0.214973	0.911288	0.0285051	0.341145	0.523607	0.367616	0.518856	-0.202527	0.7366
SMAC_00699.3_t1	2797.05	0.18864	0.801144	-1.56879	0.000221958	-0.520593	0.18924	0.0195665	0.973304	1.36493	0.000696289	0.395963	0.468156	1.34536	0.00145975	0.376396	0.505525
SMAC_00700.3_t1	1484.22	-0.0074734	0.987879	0.0684009	0.83616	0.629091	0.00483393	-0.263237	0.35778	-0.530262	0.0432525	-0.34079	0.25563	-0.267025	0.430876	-0.0775529	0.847739
SMAC_00701.3_t1	196.67	-0.315004	0.50027	-0.35212	0.329896	1.44984	1.56519e-08	1.03713	0.000198797	0.124835	0.777898	-0.286826	0.499779	-0.912298	0.0028072	-1.32396	1.03938e-05
SMAC_00702.3_t1	13321.8	0.417659	0.452557	0.213506	0.655815	0.432556	0.233754	-1.1763	0.00121302	-1.45461	4.98221e-05	-1.65316	2.65529e-06	-0.278309	0.62685	-0.476859	0.313896
SMAC_00703.3_t1	5129.32	0.404693	0.58914	0.474531	0.399907	0.921029	0.0366346	1.26653	0.00719255	0.772207	0.151325	0.129224	0.869442	-0.494327	0.453856	-1.13731	0.0250709
SMAC_00704.3_t1	1196.99	0.474865	0.190839	0.764175	0.00986321	0.246058	0.367097	0.482671	0.0965062	0.459134	0.136868	0.38968	0.239146	-0.0235377	0.962542	-0.0929916	0.834579
SMAC_00705.3_t1	281.861	-0.566282	0.62166	-1.08004	0.184169	1.54355	0.0179886	0.474722	0.602348	-0.0267527	0.980539	0.480224	0.6368	-0.501475	0.648206	0.00550144	0.995682
SMAC_00706.3_t1	2745.82	0.199822	0.562742	0.330289	0.190316	-1.0485	1.14331e-07	-0.873312	3.33914e-05	-0.761999	0.000442988	-0.721518	0.00113671	0.111313	0.75995	0.151795	0.639705
SMAC_00707.3_t1	6.68093	-0.99455	0.675041	-2.43708	0.155769	-6.84831	0.000533883	-2.12402	0.184903	-1.91081	0.262462	-3.79513	0.062303	0.21321	0.939421	-1.67111	0.527638
SMAC_00708.3_t1	32865.5	0.822115	0.205944	1.38199	0.00865641	-0.156092	0.767352	0.640375	0.240871	0.90628	0.092004	0.833777	0.136272	0.265905	0.734176	0.193402	0.802626
SMAC_00709.3_t1	75.2583	0.619449	0.588539	0.875172	0.298296	-0.770663	0.290868	0.687234	0.423075	0.818138	0.352737	0.933796	0.29711	0.130904	0.921633	0.246562	0.833232
SMAC_00710.3_t1	8037.25	1.25041	0.00606843	0.674998	0.146904	-1.17976	0.00164406	-0.317467	0.536558	1.03689	0.015135	0.357381	0.522092	1.35436	0.00140237	0.674848	0.164773
SMAC_00711.3_t1	31890.2	0.939688	0.0749025	1.36359	0.00268241	1.72545	6.19734e-06	-0.282692	0.608132	0.380226	0.485222	0.384466	0.503945	0.662918	0.210748	0.667158	0.191448
SMAC_00712.3_t1	927.224	0.358662	0.454242	0.609668	0.0891058	3.2271	4.17871e-32	-1.18232	0.000162111	-0.695802	0.0453267	0.281017	0.522092	0.486516	0.243825	1.46334	3.6395e-06
SMAC_00713.3_t1	509.589	0.0989696	0.871528	-0.0827923	0.849594	0.274445	0.393995	-0.472186	0.183613	-0.433399	0.256575	-0.21796	0.641479	0.0387866	0.949053	0.254226	0.583418
SMAC_00714.3_t1	59.3314	-0.224557	0.804119	-0.692302	0.236536	-0.32807	0.517721	-0.0375012	0.95702	0.194308	0.788012	0.633962	0.291555	0.231809	0.772339	0.671464	0.277103
SMAC_00715.3_t1	1269.43	-0.108252	0.842321	0.184722	0.619799	-1.12306	2.24462e-05	-0.76504	0.00950651	-0.279101	0.450483	0.159993	0.719396	0.485939	0.177588	0.925033	0.00205873
SMAC_00716.3_t1	423.201	0.0527422	0.958893	-0.90802	0.116136	0.401263	0.437583	-0.894332	0.102745	-0.262511	0.721537	-0.230767	0.775624	0.63182	0.353746	0.663564	0.309901
SMAC_00717.3_t1	3.45387	-0.607559	NA	-1.51488	0.494182	-1.71518	0.343918	0.603972	0.76683	1.15059	0.534866	0.533181	NA	0.546619	NA	-0.0707911	0.979488
SMAC_00718.3_t1	419.023	-0.158822	0.732938	0.368046	0.225527	1.58744	2.72681e-12	1.30224	4.75547e-08	0.108255	0.784018	-0.146889	0.723084	-1.19398	1.76958e-06	-1.44912	8.08886e-09
SMAC_00719.3_t1	68.1558	-0.123667	0.883966	-0.0128737	0.982936	1.63548	9.09236e-06	0.878766	0.0422703	-1.28982	0.00655792	-0.623466	0.290833	-2.16858	8.81894e-07	-1.50223	0.00179479
SMAC_00721.3_t1	3399.97	0.363421	0.40133	0.737984	0.023196	0.785158	0.00370886	-0.519675	0.100817	-0.427771	0.216619	0.120015	0.800583	0.0919031	0.85826	0.639689	0.0509539
SMAC_00722.3_t1	545.794	0.560154	0.340394	0.0412335	0.943402	0.407622	0.320285	0.248511	0.646158	0.206842	0.73138	0.0228829	0.974779	-0.0416685	0.957516	-0.225628	0.721455
SMAC_00723.3_t1	645.639	0.22399	0.545981	0.267	0.342142	0.560082	0.0105526	0.144636	0.642257	-0.348555	0.21299	-0.333521	0.264351	-0.493191	0.075565	-0.478157	0.0866991
SMAC_00724.3_t1	585.629	0.0759777	0.938205	-0.289154	0.63098	1.24244	0.0037253	0.841198	0.0917907	0.701935	0.196595	0.421272	0.508604	-0.139263	0.863805	-0.419926	0.520295
SMAC_00725.3_t1	643.46	-0.514515	0.327986	-0.40197	0.359431	2.22782	4.36899e-12	-0.508032	0.218331	-0.857598	0.0289808	-0.328288	0.516058	-0.349566	0.51872	0.179744	0.756982
SMAC_00726.3_t1	17.1382	-0.880152	0.582444	0.561029	0.648861	1.17143	0.20088	-0.327877	0.814371	-1.57449	0.186026	-2.61156	0.0653202	-1.24661	0.374385	-2.28369	0.130912
SMAC_00727.3_t1	680.339	0.413495	0.214317	0.625101	0.0212936	1.27727	3.77919e-09	0.430364	0.10254	0.171726	0.607116	0.255435	0.437071	-0.258638	0.454286	-0.17493	0.627837
SMAC_00728.3_t1	1728.28	0.102584	0.867783	0.274507	0.48854	0.370615	0.243989	-0.148272	0.740886	-1.05844	0.00104869	-0.832762	0.0155446	-0.910164	0.00941413	-0.684491	0.0614899
SMAC_00729.3_t1	407.728	0.195923	0.752664	0.846407	0.0294124	0.67337	0.0409566	-1.06406	0.00259181	-1.51352	1.0996e-05	-1.01147	0.00700761	-0.44946	0.35738	0.0525877	0.93904
SMAC_00730.3_t1	64.6341	0.289489	0.844506	2.14455	0.0113076	1.64673	0.022682	0.0235899	0.982849	0.874909	0.36546	0.808228	0.440096	0.851319	0.436976	0.784638	0.472977
SMAC_00731.3_t1	1363.95	-0.263921	0.788497	-0.464506	0.485608	0.39167	0.484433	-1.53978	0.00464006	-1.45276	0.0100266	-2.17779	3.98086e-05	0.0870238	0.930283	-0.638013	0.376096
SMAC_00732.3_t1	207.824	-0.0206031	0.979952	0.639856	0.211141	0.678436	0.109598	-0.180555	0.775973	-0.481859	0.391095	-0.376448	0.55119	-0.301304	0.672539	-0.195893	0.789636
SMAC_00733.3_t1	633.114	-0.582685	0.285371	-0.162065	0.756796	-0.999162	0.0055739	-0.679716	0.104926	-0.438749	0.362382	1.01327	0.0126665	0.240967	0.699302	1.69299	6.37927e-06
SMAC_00734.3_t1	334.384	-0.964832	0.310361	-1.42686	0.0589065	-3.19916	2.08416e-07	0.173713	0.861335	-0.126758	0.906726	0.222202	0.840472	-0.300471	0.788055	0.0484888	0.967954
SMAC_00735.3_t1	61.2696	-0.891415	0.404028	-1.96298	0.0172803	-2.84912	4.44875e-05	0.447408	0.629763	-1.38079	0.0870793	-0.965432	0.289697	-1.8282	0.0223919	-1.41284	0.093918
SMAC_00736.3_t1	357.203	0.0986722	0.858535	0.187509	0.613821	2.25028	6.80873e-20	1.61273	4.86538e-10	-0.663375	0.0361293	-1.24532	7.38127e-05	-2.27611	5.82628e-18	-2.85805	8.83955e-24
SMAC_00737.3_t1	4420.93	0.500676	0.148611	-0.068093	0.851484	2.64463	2.16986e-30	-0.0431546	0.916123	-0.176493	0.630307	-0.479209	0.119555	-0.133338	0.761645	-0.436055	0.172178
SMAC_00738.3_t1	817.797	-0.12798	0.788497	0.0312549	0.932353	0.131452	0.637576	-0.47226	0.0954614	-0.886276	0.000718288	-0.417718	0.187683	-0.414016	0.215095	0.0545419	0.907447
SMAC_00740.3_t1	0.791136	1.01644	NA	-1.41786	NA	-1.65686	0.659519	1.74342	0.685507	1.09233	0.828451	0.445357	NA	-0.651094	NA	-1.29806	0.812409
SMAC_00741.3_t1	38.1465	0.388167	0.675334	-0.381498	0.605099	-0.111108	0.859739	0.989031	0.0773898	1.3903	0.00944728	1.04737	0.0883191	0.401271	0.605028	0.0583428	0.952105
SMAC_00742.3_t1	9.77038	-0.519238	0.775607	-0.0453453	0.972922	-2.63339	0.0195965	-1.91968	0.105469	-1.19752	0.347458	-0.0114742	0.994209	0.722159	0.695808	1.90821	0.159147
SMAC_00743.3_t1	89.4363	-0.28909	0.70659	-0.131947	0.827513	0.171537	0.71344	0.390095	0.457272	-0.317407	0.591429	-0.0368283	0.962592	-0.707502	0.194835	-0.426923	0.492411
SMAC_00744.3_t1	106.101	0.113006	0.878862	0.980331	0.0169805	-0.396369	0.307457	0.861308	0.0236795	0.411675	0.376947	0.941319	0.0195037	-0.449633	0.366972	0.080011	0.903801
SMAC_00745.3_t1	49.316	-3.45548	0.0013051	-2.42743	0.00875087	-3.66202	5.74698e-05	3.01987	1.1279e-06	0.570386	0.517208	-2.52738	0.00881417	-2.44948	0.000231182	-5.54725	5.08973e-11
SMAC_00746.3_t1	876.654	0.127218	0.836969	-0.468466	0.22569	-1.12264	0.000238356	0.455225	0.222114	1.07824	0.00105499	0.296015	0.514956	0.623011	0.113055	-0.15921	0.7596
SMAC_00747.3_t1	2677.78	0.447518	0.196845	0.527042	0.0695686	0.348874	0.163309	-0.650046	0.0135882	-0.710807	0.00767954	-0.674206	0.0138465	-0.0607604	0.896728	-0.0241596	0.959035
SMAC_00748.3_t1	211.848	-0.647332	0.470783	-1.44196	0.0302899	-0.65746	0.262015	-1.04921	0.10128	-1.01905	0.132084	-0.255555	0.789034	0.0301685	0.979091	0.79366	0.297012
SMAC_00749.3_t1	319.232	-0.500174	0.15451	-0.401857	0.191592	-0.40201	0.113975	0.566714	0.0355277	0.362022	0.24109	0.438344	0.157546	-0.204692	0.605262	-0.12837	0.754554
SMAC_00750.3_t1	5514.59	-0.559406	0.493185	-0.571105	0.369751	-2.40317	5.57438e-07	-0.582226	0.354587	-0.652147	0.317257	-0.565301	0.419954	-0.0699209	0.94313	0.0169243	0.985175
SMAC_00751.3_t1	642.067	-1.0135	0.120392	-1.55628	0.00477205	-3.13136	7.07986e-12	-0.672351	0.242339	-0.64623	0.292366	-0.928605	0.111098	0.0261209	0.978645	-0.256255	0.744756
SMAC_00752.3_t1	144.012	-0.57429	0.384329	-1.7643	0.000341123	-1.68527	6.13972e-05	0.187788	0.763153	-0.155773	0.820642	-0.20372	0.777815	-0.34356	0.617314	-0.391507	0.539866
SMAC_00753.3_t1	559.419	-0.527397	0.257555	-0.792139	0.0351967	-0.936893	0.00254857	0.716145	0.0385233	0.677565	0.0629842	0.564589	0.147938	-0.0385801	0.951706	-0.151556	0.774511
SMAC_00754.3_t1	897.486	-0.843387	0.120292	-1.31934	0.00404564	-2.90274	5.51949e-14	1.19982	0.00393587	1.67445	3.25092e-05	1.54702	0.000152796	0.474631	0.406079	0.347202	0.554841
SMAC_00755.3_t1	177.111	0.124533	0.851592	0.337823	0.428966	0.152625	0.68461	1.99935	8.4851e-11	1.41575	1.33239e-05	0.870434	0.0198116	-0.583593	0.143081	-1.12891	0.00113721
SMAC_00758.3_t1	140.785	0.124668	0.846565	0.757326	0.0440825	-0.0621177	0.873307	0.789375	0.0209387	0.627756	0.0920208	0.573337	0.155911	-0.161619	0.768063	-0.216038	0.673144
SMAC_00759.3_t1	23226.8	0.633848	0.215584	1.05617	0.0106075	-1.70067	5.33248e-07	-0.0798491	0.88962	0.579924	0.18819	0.663448	0.128918	0.659774	0.149974	0.743297	0.0847858
SMAC_00760.3_t1	392.892	-0.760165	0.099563	-0.290753	0.512967	0.318313	0.377501	1.1474	0.00099879	-1.4456	4.28744e-05	-0.835597	0.0364319	-2.593	6.73784e-15	-1.983	7.68088e-09
SMAC_00761.3_t1	1249.08	0.100246	0.924409	-0.320834	0.629353	0.202551	0.715523	-0.0312365	0.965843	0.0321137	0.968299	0.180401	0.832393	0.0633501	0.947906	0.211637	0.799835
SMAC_00762.3_t1	1088.26	-0.0622995	0.92732	-0.347502	0.386528	-0.448655	0.166476	0.543588	0.133567	0.744873	0.0371577	0.571396	0.141794	0.201285	0.705818	0.0278076	0.962814
SMAC_00763.3_t1	271.503	-0.684965	0.279905	-0.0960497	0.876311	3.87894	5.63279e-26	0.560276	0.254585	0.263765	0.663291	-0.293237	0.661265	-0.296511	0.662592	-0.853513	0.105593
SMAC_00764.3_t1	30.7691	-0.482364	0.597069	-0.205145	0.789523	-4.36661	1.10385e-05	1.45009	0.00479767	-0.165846	0.846881	-0.300883	0.740949	-1.61594	0.00385493	-1.75097	0.00306444
SMAC_00766.3_t1	15.1644	-1.00606	0.515171	-0.944556	0.437192	-5.80107	0.00108062	-0.38548	0.779498	-0.413758	0.777072	-1.6929	0.186357	-0.0282787	0.987094	-1.30742	0.35797
SMAC_00767.3_t1	41.2727	-3.11708	0.186742	-2.44562	0.216504	-7.25936	0.000699913	3.13517	0.0674161	-2.39511	0.230384	-2.70455	0.204699	-5.53028	0.00150971	-5.83973	0.00112016
SMAC_00768.3_t1	63.1311	0.844759	0.540466	-0.212632	0.863131	-4.635	9.60219e-06	-0.31228	0.806938	1.308	0.205058	-1.89364	0.0782186	1.62028	0.127861	-1.58136	0.166391
SMAC_00769.3_t1	2.88786	-0.69929	NA	1.76686	0.313788	1.42846	0.33874	0.586182	0.790861	0.631769	0.786362	-1.20387	NA	0.0455872	NA	-1.79005	0.552996
SMAC_00770.3_t1	411.919	0.710388	0.384197	0.623293	0.346399	1.41271	0.00613388	-0.165097	0.841808	-0.286691	0.726234	-0.144303	0.878931	-0.121594	0.906665	0.0207943	0.982166
SMAC_00772.3_t1	809.123	-0.338357	0.510346	-0.48311	0.209395	0.470599	0.140945	0.538741	0.135607	0.217212	0.635915	-0.36033	0.410492	-0.321529	0.503185	-0.899071	0.0114336
SMAC_00773.3_t1	593.086	0.0574091	0.930868	0.00886784	0.983959	0.556298	0.064789	0.0544415	0.911344	0.0452153	0.92847	0.0450263	0.93735	-0.00922621	0.987094	-0.00941521	0.985494
SMAC_00774.3_t1	6577.4	-0.0461244	0.935672	0.152477	0.669482	-0.585698	0.0220582	-0.519105	0.0749519	-0.607056	0.0393034	-0.363808	0.283269	-0.0879514	0.853391	0.155297	0.710654
SMAC_00775.3_t1	115.882	-0.239092	0.717108	0.269163	0.562475	-0.884295	0.0142505	0.533828	0.189815	0.51437	0.235269	0.392785	0.42929	-0.0194585	0.97816	-0.141043	0.817442
SMAC_00776.3_t1	579.618	0.0462976	0.957584	0.327234	0.532904	-0.233251	0.603305	-0.400554	0.436901	0.174492	0.786362	0.260635	0.679387	0.575045	0.301807	0.661188	0.202714
SMAC_00777.3_t1	306.624	-0.339697	0.513233	0.172618	0.69331	-1.38239	1.15742e-05	1.07326	0.000730786	1.56281	2.83773e-07	1.56047	3.91481e-07	0.489548	0.227204	0.487216	0.217686
SMAC_00778.3_t1	8275.5	-2.57915	0.0292798	-1.04681	0.369302	8.63983	1.27513e-24	-2.17758	0.0334297	-2.81846	0.00569117	-3.14377	0.00285409	-0.640886	0.692255	-0.966189	0.509569
SMAC_00779.3_t1	2223	0.178383	0.631841	-0.0845929	0.786706	0.553162	0.00860457	-0.583816	0.0116312	-0.365902	0.164	-0.447307	0.0845651	0.217914	0.512426	0.13651	0.695965
SMAC_00780.3_t1	972.39	0.030326	0.964488	0.0466403	0.925492	1.61292	3.31321e-07	-2.76768	2.2409e-17	-2.43221	1.3268e-13	-2.96666	1.37949e-18	0.335464	0.538889	-0.198984	0.738055
SMAC_00781.3_t1	326.191	-1.6607	0.0635818	-1.25426	0.127001	-2.44117	0.000227246	-1.9176	0.0086875	-1.09472	0.194481	-0.164141	0.894388	0.82288	0.409121	1.75346	0.0258102
SMAC_00782.3_t1	272.152	0.62438	0.166314	-0.185984	0.683587	-1.72467	8.59822e-08	-0.564184	0.134908	0.0475403	0.929521	0.105729	0.854958	0.611724	0.146916	0.669912	0.099071
SMAC_00783.3_t1	381.045	1.08282	0.0685533	1.3453	0.0102181	2.04827	1.79111e-06	0.120906	0.866918	0.143499	0.851324	-0.0132073	0.987659	0.0225933	0.979649	-0.134113	0.870503
SMAC_00784.3_t1	907.985	0.114044	0.777246	0.509662	0.0411038	1.03058	2.28799e-07	0.383077	0.112332	0.152185	0.619508	0.414401	0.108253	-0.230892	0.466979	0.0313248	0.940944
SMAC_00785.3_t1	1066.8	-0.0290548	0.961246	0.277764	0.444557	0.921285	0.000710743	0.955034	0.00107377	0.110395	0.809632	0.129059	0.789144	-0.844639	0.00839743	-0.825975	0.00893886
SMAC_00786.3_t1	297.962	-0.201619	0.607187	-0.0842782	0.800571	-0.962034	1.7811e-05	0.155814	0.615119	0.26012	0.378788	-0.0991574	0.802674	0.104306	0.793005	-0.254971	0.447449
SMAC_00787.3_t1	608.473	0.585109	0.360541	1.15425	0.0181535	-0.751088	0.0780573	1.62202	0.000137039	1.53339	0.000421083	0.921288	0.0621253	-0.0886286	0.913887	-0.700732	0.188755
SMAC_00788.3_t1	7331.75	-0.560494	0.257933	-0.601672	0.140643	-0.344787	0.336359	-1.47757	1.47155e-05	-1.81409	6.478e-08	-1.45524	2.61793e-05	-0.336518	0.520605	0.022334	0.97291
SMAC_00789.3_t1	1232.17	-0.752501	0.436288	-0.273598	0.754362	-6.31516	3.01509e-25	-2.29061	0.000280217	-0.498063	0.5631	0.729528	0.38132	1.79255	0.0110587	3.02014	1.19077e-06
SMAC_00790.3_t1	702.608	0.0980835	0.883966	-0.320231	0.449984	-2.1932	3.03488e-12	-1.24263	0.000246057	-0.350273	0.426304	-0.604274	0.138436	0.892356	0.0211896	0.638355	0.122659
SMAC_00791.3_t1	3322.24	0.588232	0.300459	0.67155	0.143588	-7.10392	6.28849e-52	1.1653	0.0036324	2.1883	4.56595e-09	2.23132	2.18359e-09	1.023	0.0210247	1.06602	0.0124528
SMAC_00792.3_t1	2125.84	0.764817	0.102248	0.600329	0.153523	-0.128101	0.7476	1.45214	3.50563e-05	0.96482	0.0115659	0.699509	0.094257	-0.487322	0.31099	-0.752632	0.0705697
SMAC_00793.3_t1	1528.18	-0.13534	0.802648	-0.32396	0.354431	-0.916503	0.000682684	0.118393	0.776627	-0.17979	0.661486	0.356693	0.339562	-0.298184	0.477667	0.2383	0.568798
SMAC_00794.3_t1	970.957	0.204406	0.699906	0.447719	0.207258	0.841551	0.00293953	0.455672	0.18168	-0.386579	0.303502	-0.336163	0.407644	-0.842251	0.0121467	-0.791835	0.0177679
SMAC_00795.3_t1	265.422	-0.720559	0.0756619	-0.678669	0.0629894	-0.826543	0.00580909	-0.537628	0.123854	-0.781373	0.0217699	0.112111	0.832801	-0.243745	0.629784	0.649739	0.0812866
SMAC_00796.3_t1	257.053	0.130343	0.825258	-0.24314	0.540536	0.492821	0.101598	-0.210296	0.611491	-0.032199	0.950568	-0.185829	0.704498	0.178097	0.732538	0.0244675	0.967756
SMAC_00797.3_t1	801.621	-0.0404356	0.931287	0.0699293	0.822548	-0.0631531	0.802238	-0.114704	0.71071	0.612402	0.00845971	0.435841	0.0920316	0.727106	0.00217405	0.550545	0.0272311
SMAC_00798.3_t1	898.381	0.43156	0.249883	0.486082	0.114255	0.335647	0.205856	1.84026	4.4522e-14	-0.0636421	0.884746	-1.80682	1.33705e-11	-1.9039	1.5637e-14	-3.64708	9.0939e-47
SMAC_00799.3_t1	1300.88	0.46776	0.308642	0.8187	0.0224579	0.264252	0.424684	-1.04911	0.00106059	-0.0763572	0.884229	-0.0240008	0.966394	0.972752	0.00511342	1.02511	0.00233282
SMAC_00800.3_t1	303.518	0.311191	0.406764	0.22794	0.463524	0.276814	0.268017	0.578886	0.0248771	0.169205	0.625782	-0.0533691	0.90974	-0.40968	0.189965	-0.632255	0.0259286
SMAC_00801.3_t1	523.813	0.24459	0.685217	0.727849	0.0660407	0.790417	0.0159098	0.035287	0.947528	-0.599541	0.139611	-0.437548	0.336672	-0.634828	0.140138	-0.472835	0.302194
SMAC_00802.3_t1	4937.34	0.661839	0.278336	0.602782	0.233679	-2.00696	3.45375e-07	1.12448	0.0111813	0.552347	0.29794	-0.0353108	0.963072	-0.572134	0.320451	-1.15979	0.012544
SMAC_00802.3_t2	0	NA	NA	NA	NA	NA	NA	NA	NA	NA	NA	NA	NA	NA	NA	NA	NA
SMAC_00803.3_t1	737.925	0.488879	0.222676	0.439186	0.195699	-1.42657	1.96675e-07	1.14233	4.34221e-05	2.0646	5.36622e-15	1.3748	7.03775e-07	0.922273	0.00232841	0.23247	0.576466
SMAC_00804.3_t1	878.179	0.164848	0.755965	-0.538174	0.115062	-5.11846	6.28849e-52	0.181014	0.645497	1.20723	2.552e-05	0.776129	0.0137365	1.02622	0.000821032	0.595115	0.0813762
SMAC_00805.3_t1	93.5744	1.43572	0.00102902	-0.313327	0.565737	-0.528726	0.214769	0.333454	0.522471	1.4855	0.000175846	0.160597	0.821299	1.15205	0.00864336	-0.172857	0.807172
SMAC_00806.3_t1	12.2527	0.0727007	0.963885	-1.58322	0.13873	-2.34128	0.0131529	0.567032	0.56932	-0.127554	0.921844	-0.326543	0.815874	-0.694586	0.55756	-0.893574	0.442401
SMAC_00807.3_t1	230.642	0.292176	0.632738	-0.0920772	0.858232	-3.9401	6.62379e-23	-1.73894	1.88077e-06	-0.0612386	0.919432	-0.0180389	0.977867	1.6777	1.05289e-05	1.7209	5.72993e-06
SMAC_00808.3_t1	6582.38	0.486254	0.556913	1.17172	0.0472965	-0.765413	0.132606	-0.304003	0.665859	-0.0398591	0.963879	-0.230752	0.784219	0.264144	0.76221	0.0732518	0.940944
SMAC_00809.3_t1	1084.15	-0.688802	0.182793	-1.55983	0.000107603	-2.64084	2.55207e-14	-1.21187	0.00153378	-0.219074	0.689943	0.139159	0.826677	0.992794	0.0205792	1.35103	0.000530089
SMAC_00811.3_t1	291.553	-0.194164	0.715431	-0.931505	0.00606328	-0.767371	0.00719154	-0.556984	0.0900391	-0.319703	0.405791	-0.166983	0.724903	0.237281	0.617713	0.390001	0.335566
SMAC_00812.3_t1	1099.99	-1.03023	0.116453	-1.75284	0.00128516	-2.67086	5.77912e-09	-0.966282	0.0756438	-0.285723	0.693723	0.135558	0.873946	0.68056	0.30951	1.10184	0.0528443
SMAC_00813.3_t1	4116	-0.047501	0.951769	-1.10497	0.00594863	1.93339	4.10431e-09	-1.83351	1.02943e-07	-1.03578	0.00625239	-1.5657	1.06526e-05	0.797731	0.060955	0.267809	0.617736
SMAC_00814.3_t1	547.944	0.294972	0.606615	0.984179	0.0108954	1.25412	8.55874e-05	-0.285311	0.52054	0.126808	0.815053	0.197712	0.715928	0.412119	0.396307	0.483023	0.288216
SMAC_00815.3_t1	3744.49	0.216696	0.496093	0.388486	0.0979588	0.599591	0.00165734	-0.85234	1.79215e-05	-0.661503	0.00151535	-0.347022	0.156873	0.190836	0.535336	0.505318	0.0263986
SMAC_00816.3_t1	3704.95	0.216449	0.772037	0.658975	0.168955	0.976395	0.012042	-0.49776	0.304969	-1.01722	0.0215122	-0.86739	0.0631949	-0.519457	0.354133	-0.36963	0.528688
SMAC_00817.3_t1	3512.03	0.312523	0.323341	-0.0417586	0.893267	0.328415	0.123506	0.196888	0.468583	0.166132	0.577802	0.327117	0.224096	-0.0307557	0.940629	0.130229	0.701204
SMAC_00818.3_t1	535.443	0.302369	0.660835	-0.543385	0.259637	-0.066366	0.887804	-0.298762	0.57079	-0.354248	0.508805	0.0786402	0.915378	-0.0554853	0.941571	0.377403	0.514035
SMAC_00819.3_t1	538.831	1.03583	0.00723624	-0.146617	0.754474	-0.632907	0.0549482	0.504297	0.187532	0.914392	0.0101615	0.642384	0.104218	0.410095	0.375149	0.138087	0.804542
SMAC_00820.3_t1	15.2176	-0.292264	0.877126	0.717353	0.509066	3.16869	8.9513e-06	1.12719	0.235578	0.847293	0.429631	1.45571	0.150519	-0.2799	0.841632	0.328518	0.807228
SMAC_00821.3_t1	11.0145	2.73519	0.0377305	0.27903	0.863235	-1.14037	0.378798	0.788058	0.589698	-0.569839	0.747658	-2.01135	0.323314	-1.3579	0.406402	-2.7994	0.139662
SMAC_00822.3_t1	2806.99	0.406745	0.409236	0.378036	0.338459	0.17879	0.612526	0.00441986	0.992786	-0.115551	0.822584	-0.742168	0.0431146	-0.119971	0.834922	-0.746588	0.0441617
SMAC_00823.3_t1	10284.3	0.243247	0.750885	0.280742	0.61175	-0.200144	0.665983	-1.32815	0.00198112	-1.53383	0.000331253	-1.37717	0.00166628	-0.205683	0.775227	-0.0490219	0.950679
SMAC_00824.3_t1	396.232	-0.380911	0.548001	-0.658533	0.157914	-1.58041	2.10849e-05	0.0779827	0.899408	-0.215587	0.711691	-0.422815	0.432094	-0.293569	0.64216	-0.500798	0.34503
SMAC_00825.3_t1	2567.36	0.0589664	0.899951	-0.000217578	0.999621	0.886246	4.37856e-05	-0.300282	0.275686	0.119974	0.732886	-0.0985911	0.799901	0.420256	0.149786	0.201691	0.554077
SMAC_00826.3_t1	754.398	-0.193504	0.591321	0.117661	0.690753	0.978347	8.59866e-07	0.355026	0.144399	-0.140455	0.650395	0.15785	0.627153	-0.495482	0.0525591	-0.197176	0.534513
SMAC_00827.3_t1	318.087	-0.185307	0.86479	-1.63948	0.00984402	-0.503253	0.382621	0.450603	0.526564	0.486405	0.510577	0.0324245	0.974215	0.0358021	0.973888	-0.418179	0.612077
SMAC_00828.3_t1	113.029	-0.00589771	0.996373	0.64291	0.324516	0.491681	0.37694	-0.430293	0.541467	0.0961263	0.914242	0.178811	0.847295	0.526419	0.519916	0.609104	0.423767
SMAC_00829.3_t1	361.017	0.193281	0.66295	-0.17295	0.611999	1.12996	1.2355e-06	0.634347	0.0171104	-0.0974431	0.809632	-0.0625331	0.892851	-0.73179	0.0100653	-0.69688	0.015809
SMAC_00830.3_t1	1869.5	0.475116	0.270438	0.895717	0.00821178	0.797693	0.00533968	-0.37703	0.293073	-0.352862	0.360674	-0.0284334	0.959134	0.0241677	0.967136	0.348596	0.399503
SMAC_00831.3_t1	485.611	-0.474163	0.346979	0.00955397	0.984189	-0.627683	0.0595329	-0.219256	0.63218	-0.208118	0.671741	0.504799	0.235538	0.0111387	0.986839	0.724055	0.0687702
SMAC_00832.3_t1	113.64	1.93676	1.0692e-09	0.0167884	0.972146	0.721879	0.0241129	0.464459	0.232864	1.65689	8.97209e-08	-0.195858	0.742004	1.19243	0.000429677	-0.660317	0.145804
SMAC_00833.3_t1	218.073	0.338902	0.42963	0.508959	0.117697	0.988536	0.000109361	0.737263	0.00976707	0.305181	0.39265	0.512559	0.129398	-0.432082	0.226823	-0.224704	0.588634
SMAC_00834.3_t1	317.185	0.235927	0.741136	0.770025	0.0913495	-3.09228	2.31784e-13	1.61319	2.31868e-05	1.46766	0.000175623	1.60492	3.75173e-05	-0.145533	0.829953	-0.00826764	0.989675
SMAC_00835.3_t1	0.640847	3.82048	NA	0.899867	NA	0.660854	0.910799	3.00028	0.644328	0.429723	0.95982	4.06248	NA	-2.57056	NA	1.0622	0.899217
SMAC_00836.3_t1	2041.21	0.289305	0.413012	0.345773	0.20904	-0.474501	0.035195	0.331366	0.216574	0.152191	0.644998	0.367298	0.200686	-0.179174	0.628196	0.035932	0.934996
SMAC_00837.3_t1	217.794	0.0223078	0.974887	0.159077	0.753113	0.579943	0.100511	1.77857	1.57756e-07	0.915246	0.0173599	0.117028	0.852928	-0.863326	0.0326926	-1.66154	4.41162e-06
SMAC_00838.3_t1	297.542	1.12941	0.149313	1.30394	0.0523365	-2.60647	4.30043e-06	-0.843491	0.215392	0.987872	0.151325	0.0317779	0.976015	1.83136	0.00427401	0.875269	0.247712
SMAC_00839.3_t1	6030.79	0.0487917	0.955803	-1.23491	0.00876363	-2.95471	8.57761e-15	-0.813034	0.0762935	0.738513	0.13175	0.536036	0.323314	1.55155	0.00040181	1.34907	0.00221272
SMAC_00840.3_t1	1313.62	-0.216331	0.701815	-0.317018	0.425452	-0.864403	0.00442305	-0.617563	0.0781055	-0.603123	0.102463	-0.14643	0.779437	0.0144402	0.980816	0.471134	0.249274
SMAC_00841.3_t1	1438.75	-0.334102	0.412552	-0.335427	0.302878	-1.06264	2.17537e-05	-0.232166	0.496256	-0.542135	0.0754576	0.010183	0.983262	-0.309969	0.416632	0.242349	0.531159
SMAC_00842.3_t1	101.086	-0.165505	0.82561	-0.445126	0.362642	-0.016708	0.971463	-0.0483489	0.937009	-0.35771	0.489004	0.630469	0.186052	-0.309361	0.621053	0.678818	0.158781
SMAC_00843.3_t1	424.216	-0.486472	0.514117	-1.42746	0.00723659	-0.5613	0.236511	-0.014915	0.982745	-0.0820862	0.915937	-0.35198	0.610591	-0.0671712	0.94059	-0.337065	0.63222
SMAC_00844.3_t1	1467.08	-1.60318	0.00486805	-2.19175	2.97842e-05	-6.57679	1.39799e-43	-1.65176	0.00102591	-0.67317	0.274611	-1.43751	0.00674973	0.978586	0.107778	0.214245	0.7957
SMAC_00845.3_t1	510.99	-0.118713	0.888423	-1.01606	0.0375927	-1.10554	0.0063343	0.536645	0.279666	0.981441	0.0336833	0.98035	0.0371212	0.444796	0.467183	0.443706	0.448288
SMAC_00846.3_t1	6110.22	0.286846	0.525278	0.228588	0.525339	-1.84066	1.22703e-12	-1.05604	0.000183216	-0.913341	0.0018348	-0.38015	0.296817	0.142699	0.767899	0.67589	0.0349574
SMAC_00847.3_t1	1644.02	0.384461	0.45842	-0.314416	0.454919	-1.27548	4.8554e-05	-0.781409	0.0289182	-0.299991	0.503219	-0.391465	0.378893	0.481418	0.282451	0.389944	0.39567
SMAC_00848.3_t1	1374.63	1.173	9.54242e-05	0.123992	0.753396	-0.61639	0.0250319	-0.469726	0.143118	1.1531	4.33826e-05	0.00443994	0.992315	1.62283	3.69007e-09	0.474166	0.181331
SMAC_00850.3_t1	467.752	-0.277865	0.742978	-0.882555	0.107556	-0.721199	0.11951	0.269219	0.674627	0.416471	0.503461	0.562799	0.359534	0.147252	0.860603	0.29358	0.68615
SMAC_00851.3_t1	2060.88	-0.0539736	0.885291	1.99083e-05	0.999903	-0.355075	0.0523997	-0.121517	0.630627	0.11625	0.666952	0.0203637	0.951966	0.237766	0.359644	0.14188	0.614
SMAC_00852.3_t1	25103.4	0.179024	0.748629	0.257698	0.509374	0.84333	0.00400168	-0.431117	0.229125	-1.06057	0.000762961	-1.09931	0.000482662	-0.629454	0.0912398	-0.668195	0.0610615
SMAC_00853.3_t1	652.326	-0.298236	0.507858	-0.274868	0.438994	-0.108576	0.728763	-0.371472	0.265319	-0.202396	0.61015	0.431202	0.221483	0.169077	0.722854	0.802674	0.00956467
SMAC_00854.3_t1	879.73	0.0339663	0.954512	-0.431387	0.196292	0.360653	0.198645	0.190708	0.61111	-0.0103074	0.981307	0.063866	0.89892	-0.201015	0.6565	-0.126842	0.785147
SMAC_00855.3_t1	2916.97	0.00492984	0.992031	0.164497	0.623891	0.407759	0.103351	0.551988	0.0436197	-0.545371	0.0569462	-0.725775	0.00796189	-1.09736	2.12306e-05	-1.27776	3.28544e-07
SMAC_00856.3_t1	2163.95	-1.89464	7.59948e-05	-2.17427	3.34489e-06	-4.78148	3.50874e-30	1.84337	3.02724e-05	0.124488	0.867028	-1.61133	0.000482849	-1.71888	0.000243703	-3.45471	2.30581e-16
SMAC_00857.3_t1	2730.02	0.3861	0.461551	0.423412	0.30262	0.345796	0.319918	0.0542432	0.919656	-0.157938	0.760307	-0.348676	0.453855	-0.212181	0.70412	-0.402919	0.380451
SMAC_00858.3_t1	906.212	0.382538	0.492183	0.600328	0.148635	0.571697	0.10057	-0.642392	0.103331	-0.424192	0.347086	-0.394664	0.41086	0.2182	0.713121	0.247728	0.647639
SMAC_00859.3_t1	636.385	-0.0616203	0.951585	-0.529185	0.349012	0.718896	0.113416	0.00754688	0.991097	0.342544	0.593145	0.668186	0.249479	0.334997	0.65234	0.660639	0.267033
SMAC_00860.3_t1	494.752	-0.496916	0.362984	-0.552843	0.204888	-0.978024	0.00526256	-0.320616	0.490761	0.0583065	0.923133	0.514554	0.267545	0.378923	0.483228	0.83517	0.0459468
SMAC_00861.3_t1	374.769	-0.342517	0.360514	-0.30045	0.327481	-1.05579	9.1618e-06	0.295929	0.317332	0.232119	0.477157	0.0395149	0.931938	-0.0638105	0.888805	-0.256414	0.473366
SMAC_00862.3_t1	1260.02	-0.223854	0.772037	-1.41787	0.00249114	0.0986745	0.840271	1.39773	0.000927757	2.25372	1.96288e-08	0.586067	0.271904	0.85599	0.088733	-0.811665	0.10379
SMAC_00863.3_t1	1936.01	0.0433493	0.945997	0.0066671	0.987324	0.00744484	0.983279	0.00657463	0.987935	0.344997	0.366619	0.59065	0.0902896	0.338422	0.428436	0.584076	0.099843
SMAC_00865.3_t1	201.556	0.371556	0.485581	0.374376	0.368945	1.65953	4.59001e-08	0.0128269	0.9793	0.686115	0.0693037	0.812173	0.0314217	0.673288	0.100313	0.799346	0.0401871
SMAC_00866.3_t1	224.109	-0.755641	0.105587	-0.33983	0.439504	0.649494	0.0523979	-0.176558	0.718346	0.0345495	0.953404	0.211648	0.696163	0.211108	0.717412	0.388207	0.427633
SMAC_00867.3_t1	2051.59	0.0372764	0.940609	0.267558	0.340544	-0.119547	0.635861	-0.313021	0.246683	-0.351074	0.207779	0.0203637	0.961478	-0.038053	0.930283	0.333384	0.263886
SMAC_00868.3_t1	194.984	0.0556108	0.924409	0.292824	0.391122	0.40537	0.133988	-0.180655	0.628475	0.305269	0.383597	0.684027	0.0252989	0.485923	0.165864	0.864681	0.0042517
SMAC_00869.3_t1	979.823	0.33038	0.529584	0.902325	0.0154603	0.464142	0.156893	0.297251	0.474635	-0.0171551	0.975066	0.110739	0.844212	-0.314406	0.526919	-0.186512	0.720552
SMAC_00870.3_t1	817.379	-0.380215	0.214833	-0.455864	0.0741674	0.785866	0.000100363	0.261773	0.312381	-0.15615	0.609284	-0.465294	0.0695014	-0.417922	0.118998	-0.727067	0.00196131
SMAC_00871.3_t1	647.634	0.523424	0.359591	0.449123	0.337579	0.978678	0.00746647	-0.970097	0.0173888	-0.59513	0.201084	-1.05141	0.0133254	0.374967	0.522249	-0.0813135	0.909559
SMAC_00872.3_t1	265.161	-0.0826437	0.896906	0.555634	0.128968	0.444127	0.152448	-0.500407	0.163887	-0.548117	0.140987	0.133368	0.800769	-0.0477099	0.938213	0.633775	0.0987749
SMAC_00873.3_t1	439.704	-0.456819	0.288184	-0.362962	0.315372	-0.26315	0.393119	-0.0502919	0.914488	-0.0434707	0.92847	0.368165	0.340958	0.00682119	0.989294	0.418456	0.277577
SMAC_00874.3_t1	286.717	-0.257197	0.760417	-0.257679	0.680465	1.65348	9.61954e-05	1.09449	0.0228595	0.232417	0.736927	-0.11461	0.887761	-0.862075	0.124253	-1.2091	0.0179
SMAC_00875.3_t1	370.386	-0.277966	0.550538	-0.266655	0.463524	0.680266	0.0122066	0.353966	0.295252	0.405386	0.244037	0.201382	0.641562	0.0514197	0.924856	-0.152584	0.741213
SMAC_00876.3_t1	109.876	-0.185457	0.830566	-0.729797	0.176168	-0.65938	0.143815	-1.55367	0.000897024	-0.567002	0.31784	-1.33112	0.00905739	0.986665	0.0790939	0.222544	0.78449
SMAC_00877.3_t1	962.131	0.251929	0.560688	0.462496	0.140997	0.0488045	0.876068	-0.152626	0.679854	0.0293699	0.947814	0.371362	0.278466	0.181996	0.678094	0.523988	0.10244
SMAC_00878.3_t1	430.984	0.396654	0.492183	0.918607	0.0278155	1.22324	0.000344194	0.36666	0.418371	-0.0295022	0.962765	-0.0512347	0.940083	-0.396162	0.45793	-0.417894	0.413081
SMAC_00879.3_t1	948.875	0.26557	0.400372	0.636121	0.00608975	1.02689	6.48799e-08	-0.387705	0.093498	-0.0759769	0.817144	0.00863808	0.982073	0.311728	0.260469	0.396343	0.122309
SMAC_00880.3_t1	99.715	0.23931	0.781177	0.385588	0.511605	-0.681312	0.152243	1.33468	0.00391585	1.03226	0.0393433	1.00431	0.0559622	-0.302416	0.678094	-0.330369	0.625492
SMAC_00881.3_t1	972.831	0.234999	0.711033	-0.0112322	0.982297	1.69144	2.07368e-07	1.13786	0.00148538	0.878222	0.0223528	0.709494	0.0863396	-0.259634	0.647769	-0.428362	0.371295
SMAC_00882.3_t1	641.219	-0.271527	0.504919	-0.3794	0.215235	-0.920633	0.000147471	0.140146	0.69245	0.349268	0.266422	0.502797	0.0928841	0.209122	0.600942	0.362651	0.275817
SMAC_00883.3_t1	2780.77	0.542746	0.285927	0.129836	0.794467	-2.71082	1.0082e-16	0.59116	0.134631	2.09035	4.04457e-10	2.22793	2.06171e-11	1.49919	2.72326e-05	1.63677	2.47813e-06
SMAC_00884.3_t1	1326.73	0.0620624	0.912529	0.41238	0.206186	1.54793	7.21715e-10	-0.134464	0.730169	-1.50846	1.63741e-08	-1.51671	2.43159e-08	-1.374	6.54899e-07	-1.38225	7.00967e-07
SMAC_00885.3_t1	842.92	-0.651717	0.301675	0.166377	0.785265	-0.788043	0.0626467	0.662761	0.177674	0.272824	0.660112	1.24394	0.00675546	-0.389937	0.553259	0.581182	0.303974
SMAC_00886.3_t1	333.069	-1.28493	0.192631	-1.49687	0.0704682	-7.52483	1.78714e-17	-3.00601	2.16997e-05	-1.16946	0.167811	0.959063	0.291155	1.83655	0.0265824	3.96508	1.2684e-08
SMAC_00887.3_t1	101.358	-0.0790694	0.915632	-0.180528	0.718102	1.53746	9.33654e-07	1.36372	4.45077e-05	-0.116377	0.838809	-0.741029	0.116881	-1.4801	2.71064e-05	-2.10475	3.16857e-08
SMAC_00888.3_t1	1068.69	0.319298	0.415807	0.540677	0.0697206	0.336645	0.192245	-0.104637	0.780805	-0.283308	0.396003	-0.0324322	0.945055	-0.178671	0.670921	0.072205	0.873759
SMAC_00889.3_t1	1007.77	-1.05481	0.102559	-0.575143	0.337099	-0.763752	0.11629	-0.812608	0.142803	-0.801369	0.172709	-0.482829	0.479379	0.0112383	0.989314	0.329779	0.662006
SMAC_00890.3_t1	274.874	0.349978	0.481844	0.407637	0.28795	0.828613	0.00550087	0.337176	0.382381	0.499551	0.185017	0.418472	0.313473	0.162375	0.761859	0.0812959	0.886316
SMAC_00891.3_t1	860.942	0.259124	0.434099	-0.331192	0.200663	0.809485	5.12225e-05	0.143618	0.619855	0.500509	0.0344689	0.0428903	0.915316	0.356891	0.195635	-0.100727	0.779795
SMAC_00892.3_t1	13565.4	1.10194	0.0714979	1.08795	0.0474888	1.80067	5.26948e-05	-0.207772	0.7631	-0.124355	0.874379	-0.0929403	0.915913	0.0834171	0.927293	0.114832	0.893726
SMAC_00893.3_t1	566.629	0.131012	0.80206	0.257898	0.45459	1.29546	2.3105e-07	0.857065	0.00194861	0.351797	0.302995	0.196316	0.634436	-0.505269	0.133896	-0.660749	0.0341958
SMAC_00894.3_t1	229.419	-0.171199	0.795456	-0.342922	0.437192	0.0535872	0.896547	-0.000366462	0.999274	0.262651	0.585287	-0.0289566	0.9638	0.263018	0.63666	-0.0285901	0.965782
SMAC_00895.3_t1	505.828	0.0487457	0.951585	-0.00365477	0.994114	0.225043	0.564625	-0.441769	0.308787	-0.627777	0.143099	-0.654634	0.136892	-0.186008	0.764753	-0.212864	0.714256
SMAC_00896.3_t1	779.199	-0.24387	0.768415	-0.759082	0.153894	-0.66281	0.139365	-3.20096	6.81872e-14	-2.73628	2.58392e-10	-3.67246	3.07601e-17	0.464684	0.50081	-0.471498	0.485594
SMAC_00897.3_t1	140.286	-0.133491	0.839793	-0.250617	0.574951	0.532518	0.107854	0.118057	0.814371	-0.659208	0.0976227	-0.824183	0.0449306	-0.777266	0.0584363	-0.942241	0.0205758
SMAC_00898.3_t1	512.918	-0.267281	0.619058	0.490216	0.194279	0.768805	0.0114286	-0.121842	0.795905	0.0160525	0.975903	-0.0674782	0.90993	0.137894	0.803662	0.0543635	0.92922
SMAC_00899.3_t1	56.0393	-1.71911	0.0455038	-2.86958	0.000178253	-9.92523	1.20596e-09	-3.86748	4.70823e-08	-2.57794	0.000241516	-0.857602	0.336727	1.28954	0.183775	3.00988	7.75802e-05
SMAC_00900.3_t1	256.053	-0.0204372	0.968859	-0.0784292	0.831784	-0.308544	0.247266	-0.0764077	0.846707	-0.0899256	0.828451	-0.0954136	0.83356	-0.0135179	0.979091	-0.0190059	0.970454
SMAC_00901.3_t1	1570.05	-0.124751	0.785867	-0.416747	0.152365	-1.79181	2.82879e-15	-0.152991	0.647966	0.0656552	0.872096	-0.472701	0.105675	0.218646	0.563328	-0.31971	0.333357
SMAC_00902.3_t1	13.9928	-0.947592	0.420139	-0.755412	0.42734	-1.92023	0.0157412	-0.662108	0.480207	-0.486664	0.640313	-0.611352	0.590358	0.175444	0.902452	0.0507568	0.973688
SMAC_00903.3_t1	174.799	-0.10313	0.89561	0.238761	0.641082	1.43363	4.33856e-05	1.10328	0.00439331	0.382278	0.441704	0.479154	0.345868	-0.721002	0.120199	-0.624126	0.192446
SMAC_00904.3_t1	1025.41	-0.64929	0.288184	-1.48531	0.00143848	-4.1884	8.5556e-26	-0.0975465	0.881633	0.537679	0.308785	0.419512	0.472716	0.635226	0.250771	0.517059	0.364008
SMAC_00905.3_t1	201.791	0.873926	0.089	-0.567211	0.243128	-1.69191	1.53244e-05	0.216251	0.694911	1.06706	0.0111489	0.396805	0.474855	0.85081	0.0703785	0.180554	0.786299
SMAC_00906.3_t1	3776.62	0.12962	0.830305	0.216147	0.599382	-1.07593	0.000282573	-1.14599	0.000278407	-1.03534	0.00145303	-0.639959	0.0817279	0.110648	0.844084	0.506033	0.200393
SMAC_00907.3_t1	191.385	-0.0870063	0.896486	0.15127	0.73921	-0.0314625	0.933915	-0.574725	0.121452	-0.273549	0.5386	0.207223	0.68355	0.301176	0.55756	0.781947	0.0430904
SMAC_00908.3_t1	627.567	0.0744765	0.872883	0.393762	0.153696	0.595718	0.00732994	-0.186219	0.542262	-0.321855	0.268496	-0.333132	0.275085	-0.135636	0.732684	-0.146913	0.698072
SMAC_00909.3_t1	33.8153	-0.803722	0.467311	-1.15794	0.175031	-0.582468	0.42878	-0.118737	0.913794	-0.322703	0.760493	-0.812899	0.404412	-0.203966	0.873223	-0.694162	0.509625
SMAC_00910.3_t1	220.601	-0.364647	0.402467	-0.343704	0.324722	0.247101	0.398671	-0.444834	0.169029	-0.424546	0.216747	-0.606075	0.0769442	0.0202877	0.971108	-0.161241	0.735149
SMAC_00911.3_t1	30.5026	0.104994	0.953106	0.803427	0.415998	-1.75424	0.0717977	3.3569	3.27104e-06	2.32024	0.00293494	1.11233	0.275085	-1.03666	0.26026	-2.24457	0.00555394
SMAC_00912.3_t1	2279.16	-0.0202919	0.9606	0.0542359	0.845671	-0.116392	0.588557	-0.0455011	0.882804	-0.522793	0.014621	-0.27548	0.279326	-0.477292	0.0387612	-0.229979	0.399773
SMAC_00913.3_t1	34.301	0.0311655	0.98009	0.0908452	0.925683	-0.176411	0.819093	2.13931	0.000721279	0.232843	0.82221	0.284413	0.8014	-1.90647	0.00612623	-1.8549	0.00992678
SMAC_00914.3_t1	83.2297	-0.0925469	0.895463	0.127678	0.793929	0.687575	0.0328805	0.369087	0.366909	-0.472198	0.273228	-0.117001	0.850473	-0.841285	0.0379144	-0.486088	0.309901
SMAC_00915.3_t1	910.422	0.188001	0.596199	0.0469853	0.879643	-0.139509	0.547173	0.247636	0.337736	-0.113019	0.726484	-0.755678	0.000882472	-0.360656	0.189955	-1.00331	4.87205e-06
SMAC_00916.3_t1	1729.79	-0.124725	0.89423	0.913651	0.0909384	0.210813	0.681307	0.0950877	0.896832	-0.300766	0.651062	-0.0537679	0.949307	-0.395853	0.584777	-0.148856	0.850239
SMAC_00917.3_t1	412.285	0.22241	0.716738	-0.118454	0.807456	1.49031	1.94583e-06	0.991163	0.00439817	-0.135503	0.802435	0.070303	0.91269	-1.12667	0.00212466	-0.92086	0.0150233
SMAC_00918.3_t1	773.032	-0.425901	0.188961	-0.807358	0.00194509	-0.461824	0.0425931	-0.652366	0.00732281	-0.739743	0.00241179	-0.661592	0.00956834	-0.0873766	0.83507	-0.00922548	0.982098
SMAC_00919.3_t1	5096.55	-0.435901	0.0620294	-0.262231	0.231289	-0.696238	4.99084e-05	-0.0184148	0.948867	-0.0583768	0.845183	0.211201	0.386589	-0.039962	0.909229	0.229616	0.350978
SMAC_00920.3_t1	1101.8	-0.0817493	0.861998	-0.234353	0.433905	0.687858	0.00217859	0.709121	0.00351778	-0.242903	0.434284	-0.231194	0.490561	-0.952024	0.000106257	-0.940315	0.000121196
SMAC_00921.3_t1	1408.2	0.13477	0.708059	0.212136	0.39575	1.26316	4.40893e-12	0.358963	0.107936	-0.0327267	0.922344	0.112312	0.726746	-0.391689	0.112265	-0.246651	0.370169
SMAC_00922.3_t1	140.999	0.542544	0.413012	-0.158532	0.800772	0.569372	0.190514	0.159768	0.803289	0.332523	0.579913	0.458425	0.446824	0.172755	0.819738	0.298658	0.659285
SMAC_00923.3_t1	242.377	-0.00210651	0.996628	-0.41392	0.229775	-0.63909	0.0213981	0.0968978	0.81761	0.121963	0.780143	-0.186305	0.673551	0.0250649	0.962889	-0.283203	0.499359
SMAC_00924.3_t1	189.793	0.369513	0.629845	0.344851	0.553749	0.620166	0.170575	0.293755	0.630885	0.231226	0.736927	-0.253535	0.730679	-0.0625294	0.941887	-0.54729	0.386912
SMAC_00925.3_t1	283.273	-0.649263	0.298504	-0.943013	0.0593976	-0.870623	0.0367537	0.333175	0.5485	-0.0918446	0.899338	-0.54813	0.331592	-0.42502	0.50446	-0.881306	0.0837158
SMAC_00926.3_t1	744.346	0.48981	0.257933	0.411097	0.259981	2.45966	1.23173e-19	0.339763	0.356165	0.441135	0.232988	-0.141268	0.780148	0.101372	0.852081	-0.481032	0.215884
SMAC_00927.3_t1	319.087	-0.332872	0.487753	-0.251476	0.515766	1.68615	4.24155e-10	0.631419	0.0493475	-0.280999	0.480435	-0.394801	0.330039	-0.912418	0.00568666	-1.02622	0.00167182
SMAC_00928.3_t1	616.89	-0.39771	0.381216	-0.563963	0.110608	-0.273977	0.381578	0.628293	0.0522438	0.174573	0.689956	0.0277584	0.960499	-0.45372	0.246721	-0.600534	0.0934679
SMAC_00929.3_t1	923.623	0.031985	0.959254	-0.109795	0.798596	-0.864175	0.0027959	0.517191	0.125157	0.940119	0.00264169	1.02238	0.00101378	0.422928	0.294417	0.505191	0.174099
SMAC_00930.3_t1	872.935	-0.301078	0.755965	-0.756523	0.233087	0.519971	0.342316	-0.0951363	0.909696	0.0958518	0.913536	-0.0959848	0.922182	0.190988	0.838519	-0.000848535	0.999056
SMAC_00931.3_t1	894.049	0.133419	0.87663	-0.919941	0.0665975	-1.99494	7.36282e-07	-0.939988	0.043885	-0.732086	0.15238	-0.742417	0.1567	0.207902	0.779247	0.197571	0.783204
SMAC_00932.3_t1	287.029	1.76013	7.47451e-05	1.31469	0.00518658	0.894175	0.0280248	0.552265	0.267219	1.24353	0.00482255	0.157466	0.829349	0.691263	0.199643	-0.394799	0.525361
SMAC_00933.3_t1	1664.09	0.193769	0.772615	0.326267	0.477721	1.96547	4.12627e-09	-0.597207	0.147864	-0.46734	0.30678	-0.398482	0.421096	0.129867	0.841256	0.198725	0.732803
SMAC_00934.3_t1	312.358	0.325511	0.400408	0.452106	0.12978	1.39476	1.03741e-09	-0.0954754	0.798989	-0.631565	0.0259083	0.015957	0.973546	-0.536089	0.0912398	0.111432	0.800562
SMAC_00935.3_t1	353.369	-0.796605	0.282347	-1.57489	0.00700327	-0.335565	0.541569	1.11939	0.0406845	-0.112514	0.896769	0.216208	0.799793	-1.2319	0.0367016	-0.90318	0.147207
SMAC_00936.3_t1	511.932	-0.312009	0.62372	-0.0893267	0.868628	0.125355	0.768853	0.125526	0.824622	-0.276148	0.601824	-0.180243	0.772438	-0.401674	0.468379	-0.30577	0.585878
SMAC_00937.3_t1	168.347	-0.394027	0.487441	-0.0792496	0.877538	0.0310224	0.940309	0.495668	0.223803	-0.288161	0.551369	-0.87081	0.0385674	-0.783829	0.0630595	-1.36648	0.000405329
SMAC_00938.3_t1	2268.88	0.331324	0.413497	0.619367	0.0426267	1.12604	4.96056e-06	-0.643095	0.0227996	-0.716554	0.0121729	-0.850791	0.00240062	-0.0734592	0.880679	-0.207696	0.602868
SMAC_00939.3_t1	693.309	-0.145314	0.853491	-0.489448	0.324028	-0.125127	0.786275	-0.171525	0.772225	-0.346201	0.527654	-0.33082	0.575508	-0.174677	0.80462	-0.159295	0.815861
SMAC_00940.3_t1	485.71	1.44319	3.82022e-06	0.125651	0.772224	2.70932	1.39321e-23	-1.07714	0.000736344	0.558931	0.115172	-0.0599943	0.918288	1.63607	1.4002e-07	1.01715	0.00338462
SMAC_00941.3_t1	28.538	2.43822	0.000480626	-0.0868975	0.932172	-0.38779	0.614296	0.268424	0.785874	0.967826	0.225799	-0.639929	0.565235	0.699402	0.472385	-0.908353	0.392991
SMAC_00942.3_t1	111.187	1.2622	0.00439969	0.134025	0.812738	-1.14695	0.00461314	0.430533	0.369108	1.15976	0.00419387	0.763086	0.104321	0.729227	0.127693	0.332553	0.570987
SMAC_00943.3_t1	1436.6	0.0871905	0.904762	-0.0173637	0.972142	-0.65132	0.0641945	-0.671144	0.091993	-0.358666	0.446121	-0.431037	0.364202	0.312477	0.574952	0.240106	0.664785
SMAC_00944.3_t1	1135.71	0.256713	0.51207	-0.254993	0.406749	0.836809	0.000279969	-0.192281	0.549808	-0.586824	0.0311123	-0.796581	0.00233899	-0.394543	0.21987	-0.6043	0.0331639
SMAC_00945.3_t1	494.249	-0.274538	0.69278	-1.19587	0.00759562	-1.86074	5.13262e-07	-0.537995	0.243779	0.551246	0.253844	-0.279397	0.636137	1.08924	0.0140676	0.258598	0.673123
SMAC_00946.3_t1	575.415	-0.208396	0.761305	-0.372109	0.429874	-1.77083	5.25618e-07	-0.42941	0.345384	-0.298879	0.560902	0.0382328	0.955619	0.130531	0.846092	0.467643	0.35854
SMAC_00947.3_t1	590.575	0.13036	0.835019	0.503243	0.191111	0.788679	0.0109771	0.7486	0.0303326	-0.392652	0.344129	-0.706263	0.0643378	-1.14125	0.00101001	-1.45486	1.14886e-05
SMAC_00948.3_t1	412.321	0.253344	0.699562	0.662614	0.125673	0.531097	0.148667	-0.165424	0.757687	-0.382021	0.430634	0.377258	0.462899	-0.216597	0.729744	0.542682	0.258457
SMAC_00949.3_t1	364.767	-0.406773	0.512613	-0.97776	0.0303902	1.18573	0.00114799	-0.662178	0.1307	-0.728013	0.108614	-0.547554	0.276655	-0.0658354	0.930093	0.114624	0.867175
SMAC_00950.3_t1	2330.6	-0.352655	0.297662	-0.0393025	0.907856	0.139138	0.581003	-0.395348	0.130477	-0.668698	0.00677647	-0.402287	0.154674	-0.273351	0.408769	-0.00693874	0.985688
SMAC_00951.3_t1	1130.22	0.452891	0.168728	0.249448	0.407881	2.85345	8.88863e-41	-0.341696	0.226493	-0.387878	0.183514	-0.349077	0.266477	-0.0461824	0.922078	-0.007381	0.985688
SMAC_00952.3_t1	1659.68	-0.696494	0.0914435	-0.222193	0.58794	3.26467	1.80927e-31	-0.147453	0.742643	-0.009257	0.985004	0.211149	0.656596	0.138196	0.799093	0.358602	0.408119
SMAC_00953.3_t1	261.145	1.01686	0.0107218	0.644731	0.107967	2.1221	4.75463e-12	0.820145	0.0229953	0.505731	0.224321	0.346112	0.477305	-0.314414	0.542578	-0.474033	0.301392
SMAC_00954.3_t1	55.8702	0.0696606	0.952252	-0.163848	0.828816	-0.412472	0.467995	0.18207	0.814596	0.565298	0.399258	0.499943	0.501656	0.383227	0.648809	0.317873	0.706444
SMAC_00955.3_t1	1823.67	0.200937	0.723761	0.408873	0.284722	0.358389	0.266448	-0.418662	0.26191	-0.196249	0.667624	-0.149794	0.773355	0.222412	0.665908	0.268868	0.562042
SMAC_00956.3_t1	1.61821	-0.468754	NA	1.01671	NA	1.79524	0.51508	-0.935681	0.835224	1.12404	0.781514	1.826	NA	2.05972	NA	2.76169	0.509391
SMAC_00957.3_t1	210.137	0.107345	0.885401	0.0828521	0.877739	-0.651165	0.0796539	0.56622	0.179902	0.477754	0.302012	0.533621	0.260773	-0.0884661	0.897709	-0.0325993	0.962342
SMAC_00958.3_t1	4857.84	0.349576	0.548971	0.418613	0.342809	1.07594	0.00168251	0.161402	0.757814	-1.1946	0.00139618	-1.2416	0.000912048	-1.356	0.000368573	-1.403	0.000153703
SMAC_00959.3_t1	301.897	0.180287	0.80424	0.349216	0.467235	0.971998	0.00701191	0.476707	0.290216	0.497269	0.293169	1.35878	0.000444194	0.0205626	0.978258	0.882073	0.0405147
SMAC_00960.3_t1	160.776	0.131262	0.852621	0.712787	0.0888397	0.644519	0.0659362	0.394636	0.368293	-0.302605	0.540467	0.0300664	0.964237	-0.697241	0.121318	-0.364569	0.492924
SMAC_00961.3_t1	763.231	-0.089312	0.875788	0.352577	0.311404	0.742294	0.00633369	-0.0927265	0.830224	-0.548444	0.0987664	-0.0302345	0.953651	-0.455717	0.224884	0.062492	0.905309
SMAC_00962.3_t1	127.838	1.10051	0.0473351	-0.302263	0.621332	1.7928	1.06273e-05	0.350607	0.547867	1.71788	8.69252e-05	0.0938174	0.913265	1.36727	0.00430955	-0.25679	0.727503
SMAC_00963.3_t1	487.085	-0.0199288	0.970621	-0.23812	0.487184	0.871296	0.000509414	0.267654	0.420145	-0.206812	0.578901	-0.460926	0.169503	-0.474466	0.162386	-0.72858	0.0168359
SMAC_00965.3_t1	3543.94	0.0198122	0.97229	-0.0878227	0.829111	-2.05462	7.6224e-15	0.0163197	0.969689	0.302187	0.422069	-0.022095	0.9663	0.285867	0.50844	-0.0384147	0.944996
SMAC_00966.3_t1	1472.64	-0.6335	0.0980746	-0.760631	0.022873	-0.574951	0.0428319	-0.21497	0.577406	-0.129879	0.773949	0.191097	0.666049	0.0850905	0.873437	0.406066	0.287187
SMAC_00967.3_t1	1835.55	0.273321	0.745683	-0.925603	0.0870203	-0.330305	0.505884	-0.518072	0.359845	0.495993	0.412096	-0.275282	0.703093	1.01407	0.0664631	0.242791	0.743557
SMAC_00968.3_t1	2365.57	-0.0946283	0.880384	-0.503463	0.177411	-0.294388	0.369991	0.928682	0.00418858	0.565596	0.125933	0.399805	0.332495	-0.363086	0.419426	-0.528878	0.174316
SMAC_00969.3_t1	81.354	0.321112	0.746889	0.360876	0.617604	2.31481	2.05418e-06	0.978911	0.0979922	0.782117	0.23143	1.00213	0.122317	-0.196794	0.833952	0.0232213	0.980939
SMAC_00970.3_t1	539.877	-0.415305	0.572591	-1.33269	0.00978771	1.8684	6.81495e-06	-0.0625535	0.929884	0.248972	0.7084	0.568584	0.332495	0.311525	0.67031	0.631137	0.281147
SMAC_00971.3_t1	2143.57	-1.0317	0.0635818	-0.69514	0.176596	-4.26434	1.5952e-26	-0.832511	0.0834249	-0.413476	0.472988	0.127444	0.864745	0.419036	0.524931	0.959955	0.0562609
SMAC_00972.3_t1	1511.72	0.203016	0.656123	-0.0249902	0.948382	0.665028	0.008539	0.0739984	0.854818	0.149985	0.701418	0.103683	0.816028	0.0759863	0.876247	0.0296841	0.952105
SMAC_00973.3_t1	1508.24	0.028755	0.952289	-0.783738	0.0012253	-0.551176	0.00886295	-1.58149	2.22793e-14	-0.928918	2.28198e-05	-0.91443	3.8249e-05	0.652571	0.00843127	0.667059	0.0059912
SMAC_00974.3_t1	219.839	-0.272265	0.644037	-0.155672	0.745396	-0.679208	0.0448805	0.0731545	0.892445	0.0842364	0.88166	0.335608	0.484635	0.0110819	0.986839	0.262453	0.611823
SMAC_00975.3_t1	1130.25	-0.362605	0.417326	-0.451777	0.194228	-0.291684	0.333711	0.675883	0.029658	0.317951	0.400463	0.632599	0.0582132	-0.357932	0.376758	-0.0432839	0.938376
SMAC_00976.3_t1	782.321	-0.558629	0.307426	-0.452762	0.32168	-0.903156	0.0121132	0.981937	0.011348	1.25318	0.000977824	1.54249	3.04841e-05	0.27124	0.649767	0.560556	0.233023
SMAC_00977.3_t1	1478.95	0.116357	0.842321	0.623474	0.0762673	0.747723	0.00985084	-0.165026	0.696185	-1.21406	7.03076e-05	-1.02832	0.0011915	-1.04904	0.00134217	-0.863294	0.00986074
SMAC_00978.3_t1	413.874	-0.782551	0.268661	-1.20685	0.0341974	0.785181	0.104104	0.77676	0.162443	-0.10126	0.902754	-0.415847	0.557359	-0.87802	0.153479	-1.19261	0.0323453
SMAC_00979.3_t1	2107.73	0.271417	0.521316	0.0579525	0.879643	-0.312783	0.247225	-0.612805	0.0312673	-0.192947	0.605105	-0.284356	0.433528	0.419858	0.226645	0.328449	0.362903
SMAC_00980.3_t1	305.872	-0.0331605	0.957446	0.381736	0.278686	0.519172	0.0669437	-0.187338	0.636211	0.128267	0.776084	0.2686	0.518628	0.315605	0.462277	0.455938	0.228194
SMAC_00981.3_t1	300.129	0.203234	0.734221	0.478825	0.225308	0.196569	0.583428	-0.213606	0.634109	0.012352	0.981272	-0.208763	0.687531	0.225958	0.679227	0.00484322	0.993176
SMAC_00982.3_t1	940.776	0.402923	0.345445	0.659943	0.0474261	0.127171	0.690826	0.254998	0.488279	0.127994	0.775208	0.400554	0.27958	-0.127004	0.799309	0.145556	0.754584
SMAC_00983.3_t1	2621.53	-0.494641	0.279974	-0.146674	0.737929	-0.763923	0.0121428	-0.191017	0.659809	-0.488427	0.202924	-0.355906	0.404164	-0.29741	0.537531	-0.164888	0.745137
SMAC_00984.3_t1	851.848	-0.567405	0.289383	-1.08373	0.00981833	-0.869588	0.0144249	0.0802279	0.889828	0.131571	0.82221	0.145718	0.813037	0.0513434	0.941162	0.0654904	0.924603
SMAC_00985.3_t1	528.302	-0.295251	0.721412	0.479157	0.399834	0.449295	0.342694	0.507357	0.362787	0.817707	0.127003	1.06508	0.0383198	0.31035	0.678094	0.557723	0.367836
SMAC_00986.3_t1	509.507	0.0136743	0.975693	-0.0051822	0.987568	0.245881	0.304611	0.340771	0.204059	0.63785	0.00989622	0.469968	0.0876591	0.297079	0.352856	0.129197	0.730446
SMAC_00987.3_t1	873.73	-0.101079	0.850602	-0.469277	0.153523	-0.67547	0.01136	0.332778	0.314861	-0.0901456	0.840685	-0.129979	0.776271	-0.422923	0.243825	-0.462757	0.180719
SMAC_00989.3_t1	13294	0.220052	0.602358	0.0189173	0.958142	-0.797634	0.000899167	0.0858745	0.821315	0.0987614	0.806958	-0.272736	0.430029	0.0128868	0.979091	-0.35861	0.277376
SMAC_00990.3_t1	1190.04	0.0655629	0.919353	-0.550877	0.13536	3.46442	3.61242e-36	-0.830303	0.011397	-0.914306	0.00577854	-1.04376	0.00174909	-0.0840029	0.88586	-0.213462	0.669045
SMAC_00991.3_t1	117.028	0.760764	0.127115	0.340252	0.477721	1.32282	0.000127005	-0.0149815	0.978823	-0.0788632	0.901753	-0.159807	0.808658	-0.0638817	0.930093	-0.144825	0.831364
SMAC_00992.3_t1	844.62	-0.774591	0.143257	-0.980085	0.0302899	-2.1986	2.04696e-09	0.242025	0.65024	0.638195	0.173347	0.249112	0.677476	0.39617	0.497659	0.00708752	0.991547
SMAC_00993.3_t1	1133.29	-0.210952	0.686648	-0.449578	0.203425	0.00423538	0.990106	-0.131673	0.759199	-0.0254686	0.960309	0.042125	0.938554	0.106205	0.840131	0.173798	0.71197
SMAC_00994.3_t1	471.246	-0.0468317	0.948095	0.473145	0.233519	0.206229	0.566248	0.2939	0.487124	-0.344507	0.428889	-0.503633	0.235768	-0.638408	0.121146	-0.797533	0.0380987
SMAC_00995.3_t1	669.834	0.348273	0.637076	0.646162	0.212434	2.53698	1.78478e-10	0.341176	0.549049	0.088174	0.904126	-0.438129	0.474528	-0.253002	0.73028	-0.779306	0.148886
SMAC_00996.3_t1	364.659	-0.877847	0.0171893	-1.22541	0.000271957	-0.462218	0.127613	0.0194602	0.965078	-0.11635	0.809394	-0.155561	0.755495	-0.13581	0.796492	-0.175021	0.720001
SMAC_00997.3_t1	751.877	0.249718	0.419423	-0.281415	0.252181	0.0610258	0.791326	-0.490719	0.0233543	0.36207	0.124454	-0.0889023	0.794081	0.85279	4.44755e-05	0.401817	0.107149
SMAC_00998.3_t1	625.752	0.258627	0.458091	-0.0389213	0.905948	0.0490011	0.851891	-0.143359	0.637943	-0.148053	0.644333	-0.322122	0.2707	-0.00469453	0.990357	-0.178763	0.60268
SMAC_00999.3_t1	453.561	-0.00672126	0.994412	0.00722641	0.990722	0.381345	0.407008	1.04577	0.0244832	0.543522	0.326587	0.415317	0.501519	-0.502245	0.42145	-0.63045	0.267418
SMAC_01000.3_t1	867.485	0.690352	0.113613	0.486461	0.215255	0.182274	0.612526	-1.07046	0.00154961	-0.65	0.0880625	-0.474723	0.261592	0.420464	0.364725	0.595741	0.147123
SMAC_01001.3_t1	8465.26	0.308373	0.740333	0.567378	0.369385	0.231079	0.684276	-1.41599	0.00807968	-2.17108	2.212e-05	-2.3991	1.97131e-06	-0.755092	0.268365	-0.983105	0.111105
SMAC_01002.3_t1	396.528	0.363681	0.478633	0.392628	0.324993	-1.2087	0.000113837	-0.757929	0.0321391	-0.0161555	0.976451	-0.0643636	0.916318	0.741773	0.0592074	0.693565	0.0786731
SMAC_01003.3_t1	1359.38	0.0464199	0.943273	-0.0721418	0.868282	0.124073	0.713505	-0.342545	0.35522	-0.570295	0.107814	-0.1983	0.668394	-0.22775	0.64365	0.144245	0.772945
SMAC_01004.3_t1	27.9489	-0.0601366	0.960014	0.446387	0.531012	-0.595509	0.337479	0.495785	0.471911	1.3884	0.0134549	1.55799	0.00666105	0.892618	0.180802	1.06221	0.0976444
SMAC_01005.3_t1	2090.29	0.433257	0.330222	-0.0386547	0.929938	0.48293	0.105098	-0.428553	0.222137	0.164822	0.71448	-0.15806	0.74581	0.593375	0.109351	0.270493	0.538423
SMAC_01006.3_t1	195.444	1.54292	1.88044e-06	0.263748	0.525394	0.985173	0.00101785	0.703105	0.040529	1.13395	0.000403569	-0.285416	0.562954	0.430844	0.3106	-0.988521	0.00764344
SMAC_01007.3_t1	3023.87	-1.47314	0.0167805	-1.7364	0.00245875	-1.70624	0.000470188	1.67157	0.00145279	1.0586	0.0722133	0.00707093	0.992911	-0.612973	0.400412	-1.6645	0.00234294
SMAC_01009.3_t1	619.769	0.650391	0.0393198	-0.733118	0.0128547	-4.80588	5.76614e-53	-0.2301	0.477905	1.14476	4.19008e-06	-0.447407	0.155495	1.37486	3.20462e-08	-0.217307	0.572882
SMAC_01010.3_t1	1090.61	-0.347148	0.517081	-0.860533	0.026337	-0.00676725	0.986456	0.251395	0.570259	-0.0780515	0.889379	-0.246646	0.621938	-0.329446	0.514192	-0.498041	0.249096
SMAC_01011.3_t1	519.227	0.0976623	0.892464	-0.19735	0.686701	1.65516	4.96407e-07	-0.600045	0.139432	0.0119227	0.983479	-0.232709	0.672754	0.611967	0.183663	0.367336	0.47869
SMAC_01012.3_t1	253.476	0.0549107	0.932436	0.402154	0.267518	1.40347	2.4556e-07	0.543881	0.0992291	0.569618	0.0964852	0.387859	0.330039	0.025737	0.963164	-0.156022	0.7489
SMAC_01012.3_t2	0	NA	NA	NA	NA	NA	NA	NA	NA	NA	NA	NA	NA	NA	NA	NA	NA
SMAC_01013.3_t1	342.216	-1.01604	0.193956	-0.484064	0.496925	-11.7914	1.04188e-13	-3.01134	4.58469e-08	-0.989024	0.136868	-0.157673	0.871779	2.02231	0.00100559	2.85366	4.62973e-07
SMAC_01014.3_t1	1759.64	-0.20984	0.734221	-0.875278	0.0256668	-3.10468	9.07812e-23	1.52233	4.51853e-06	0.202193	0.685126	-0.0120065	0.984548	-1.32013	0.000196156	-1.53433	6.27159e-06
SMAC_01015.3_t1	1499.65	0.223082	0.554129	0.651751	0.0138429	0.366251	0.112135	-0.0623828	0.861996	-0.24522	0.421306	0.252409	0.428031	-0.182837	0.623923	0.314791	0.30906
SMAC_01016.3_t1	492.503	-0.313437	0.662324	-0.876221	0.0704682	0.463184	0.272126	-0.147501	0.810348	-0.358869	0.519502	-0.0419749	0.955916	-0.211367	0.764867	0.105526	0.886316
SMAC_01017.3_t1	611.666	0.0951863	0.821233	0.281878	0.288213	0.618261	0.00273593	-0.223275	0.411968	-0.175213	0.558161	0.0763539	0.840095	0.048062	0.909494	0.299629	0.310966
SMAC_01018.3_t1	257.879	-0.00137421	0.998433	0.461116	0.344347	1.00333	0.00813049	-0.223348	0.688326	-0.250974	0.663846	0.142729	0.835035	-0.0276261	0.972283	0.366077	0.5345
SMAC_01019.3_t1	2.29032	-2.77056	NA	1.04096	0.707631	-1.53291	0.572518	0.867714	0.767477	1.11882	0.704619	1.97394	NA	0.251105	NA	1.10623	0.721455
SMAC_01020.3_t1	7.19799	-2.03182	0.335608	0.669274	0.664044	-5.30113	0.00475025	-0.0054594	0.997436	0.740577	0.644998	0.711477	0.692441	0.746036	0.694357	0.716936	0.701819
SMAC_01021.3_t1	3.163	-0.689791	NA	0.766203	0.744692	-2.1399	0.2978	-1.69788	0.479793	-1.02134	0.698294	-0.50917	NA	0.676545	NA	1.18871	0.70998
SMAC_01022.3_t1	4.55478	-0.0171867	NA	-1.28877	0.529913	-1.2281	0.45867	-0.00746092	0.997162	-0.560296	0.809222	1.3123	NA	-0.552835	NA	1.31976	0.522322
SMAC_01023.3_t1	7.82259	1.63306	0.451844	0.0846792	0.966566	0.412237	0.802648	0.525109	0.803483	1.59372	0.372282	1.22792	0.550599	1.06861	0.630273	0.702811	0.761633
SMAC_01024.3_t1	46.5051	0.861138	0.283597	0.235625	0.768403	0.466689	0.428054	0.86786	0.165666	0.971734	0.130713	1.2802	0.0415063	0.103874	0.920991	0.412337	0.615501
SMAC_01025.3_t1	590.297	-0.136446	0.782567	0.0880369	0.814637	-0.541726	0.0371536	0.404412	0.180258	0.856294	0.00161379	0.82036	0.00323319	0.451881	0.176721	0.415948	0.21234
SMAC_01027.3_t1	340.347	-0.0777504	0.904762	0.498859	0.184787	-0.191072	0.58127	-0.0659222	0.895713	-0.54857	0.147602	0.00873249	0.987963	-0.482648	0.255767	0.0746547	0.899217
SMAC_01028.3_t1	7.01968	0.614399	0.724591	-1.82526	0.241619	-0.738691	0.520909	0.405424	0.773345	0.48286	0.738081	1.25664	0.314316	0.0774369	0.966722	0.851218	0.546279
SMAC_01029.3_t1	2.1986	-0.198808	NA	0.804144	0.738408	-0.921927	0.671942	-0.477899	0.868214	-1.07009	0.713786	1.52352	NA	-0.592193	NA	2.00142	0.435598
SMAC_01030.3_t1	68.9386	-0.944981	0.291475	-0.717691	0.337191	-8.19905	3.76265e-07	2.00972	0.000522855	0.778953	0.282002	0.285587	0.771798	-1.23077	0.0723465	-1.72414	0.00698882
SMAC_01031.3_t1	182.786	-0.729227	0.0399885	-1.09109	0.000573492	-5.79081	4.89375e-28	0.408891	0.196348	-0.409387	0.230508	-0.928308	0.00278572	-0.818278	0.00833508	-1.3372	5.81389e-06
SMAC_01032.3_t1	945.386	-0.0646176	0.891745	-0.339044	0.230225	1.15184	9.0582e-08	-0.278136	0.325808	-0.301545	0.306563	-0.336338	0.267112	-0.0234091	0.959493	-0.058202	0.893038
SMAC_01033.3_t1	3019.77	-0.586317	0.0938812	-0.363595	0.258237	1.17197e-05	0.99996	-0.173839	0.629973	-0.817619	0.00353925	-0.554835	0.0745819	-0.64378	0.0385621	-0.380996	0.273132
SMAC_01034.3_t1	719.07	0.020892	0.968029	-0.0443378	0.907856	0.473056	0.0638559	-0.560647	0.0492812	-0.0575625	0.897009	-0.154861	0.707973	0.503084	0.122701	0.405786	0.231702
SMAC_01035.3_t1	1593.13	-0.340188	0.501185	-0.48052	0.205316	-0.344577	0.292267	-1.87058	7.72157e-10	-1.71451	2.72357e-08	-1.96529	1.5708e-10	0.156073	0.77657	-0.0947131	0.865826
SMAC_01036.3_t1	408.117	-0.067719	0.917209	0.0232336	0.958659	-0.0854951	0.813509	-0.6068	0.0819881	-0.596289	0.104097	0.122389	0.818003	0.0105114	0.986839	0.72919	0.0463884
SMAC_01037.3_t1	555.269	-0.739644	0.196551	-1.21577	0.0096886	-2.34004	1.48779e-09	-0.26889	0.628018	0.173099	0.788012	0.737106	0.134681	0.44199	0.462511	1.006	0.0300277
SMAC_01038.3_t1	340.55	-0.144139	0.889114	0.0115021	0.987324	3.87971	1.41096e-17	0.575468	0.349728	-0.243441	0.756593	-1.04979	0.0966137	-0.818909	0.216822	-1.62526	0.0048964
SMAC_01039.3_t1	199.098	-0.136183	0.80535	0.457667	0.174335	1.71308	1.09761e-11	-0.307511	0.386853	0.152842	0.718661	0.236601	0.578701	0.460352	0.225669	0.544112	0.137592
SMAC_01040.3_t1	639.529	0.0452455	0.933246	0.312469	0.308758	0.760917	0.00130314	-0.0335455	0.932864	0.249224	0.448383	0.559005	0.0522292	0.282769	0.436404	0.592551	0.0403888
SMAC_01041.3_t1	505.374	-0.326648	0.773433	-0.88159	0.232232	0.380814	0.566512	0.25387	0.777903	0.702923	0.373078	0.6658	0.424503	0.449054	0.650995	0.41193	0.661861
SMAC_01042.3_t1	2321.07	0.553484	0.33662	0.81619	0.0719808	2.53452	1.16205e-12	-0.254351	0.630204	-0.77529	0.0847534	-0.774874	0.0924799	-0.520939	0.330598	-0.520523	0.317264
SMAC_01043.3_t1	183.463	-0.335919	0.528382	-0.0936438	0.84048	1.71527	2.12784e-09	1.7619	2.53235e-09	-0.153833	0.756609	0.408407	0.343608	-1.91573	3.61648e-10	-1.35349	3.11758e-05
SMAC_01044.3_t1	38.1969	0.772814	0.28351	1.2423	0.0270576	0.941342	0.0489038	-0.503685	0.448478	0.344118	0.627086	0.520457	0.472561	0.847803	0.220403	1.02414	0.127006
SMAC_01045.3_t1	25.7619	-0.225893	0.853282	0.786013	0.286173	-0.245498	0.722009	-2.5088	0.000813136	-1.72352	0.0183318	-1.18922	0.161614	0.785283	0.512002	1.31959	0.198007
SMAC_01046.3_t1	36.5875	-0.722024	0.457259	-0.0657835	0.940647	-0.0146047	0.983745	-1.68978	0.0128499	-1.91646	0.00535043	-0.0843666	0.941191	-0.226681	0.857252	1.60541	0.0337894
SMAC_01047.3_t1	545.526	-0.703034	0.491153	-0.337624	0.701226	-4.10976	2.05018e-11	-2.50601	0.000108968	-0.842622	0.298373	1.14711	0.138745	1.66339	0.0265271	3.65312	6.73041e-09
SMAC_01048.3_t1	732.41	0.0666067	0.919353	0.172936	0.687393	2.29737	5.82022e-16	-0.196166	0.648578	-0.0241072	0.964504	-0.284112	0.531628	0.172058	0.747641	-0.0879465	0.876875
SMAC_01049.3_t1	1419.42	0.621083	0.316386	0.645561	0.197567	2.26984	4.77835e-09	-0.851028	0.0664838	-0.67502	0.184384	-0.479519	0.39898	0.176008	0.81265	0.371509	0.54994
SMAC_01050.3_t1	2523.03	0.177844	0.801391	0.515571	0.247297	1.73477	4.64412e-07	-0.911871	0.0208751	-0.955432	0.018045	-0.982947	0.0160921	-0.0435617	0.952878	-0.071076	0.918557
SMAC_01051.3_t1	213.392	0.950693	0.199462	0.773331	0.226087	-0.211924	0.721872	-0.424394	0.546341	0.431954	0.5539	-0.198085	0.830024	0.856348	0.221695	0.226309	0.803472
SMAC_01052.3_t1	5.98007	1.81423	0.230347	0.46465	0.775973	-1.32503	0.359402	-2.02136	0.267887	1.60572	0.21475	0.849161	0.623353	3.62709	0.0377477	2.87053	0.133857
SMAC_01053.3_t1	0.0721982	0.869012	NA	0.899817	NA	0.660849	0.931614	2.11088	0.831625	0.42972	0.967647	1.37941	NA	-1.68116	NA	-0.731467	0.952105
SMAC_01054.3_t1	985.594	0.0972785	0.902938	-0.154093	0.782584	-1.12259	0.0028748	0.225826	0.677849	0.646976	0.168191	0.707238	0.134322	0.421151	0.464675	0.481412	0.366603
SMAC_01055.3_t1	253.848	0.609245	0.194203	0.806185	0.0380782	-0.259078	0.479051	0.681284	0.0645076	1.0422	0.00285668	0.840757	0.0259345	0.360914	0.458458	0.159474	0.774351
SMAC_01056.3_t1	21.1388	0.213036	0.892786	1.24184	0.157276	-0.339421	0.704501	1.35127	0.0949687	1.98744	0.00939293	1.62619	0.0561525	0.636167	0.545306	0.274918	0.819189
SMAC_01057.3_t1	101.647	0.274194	0.740482	0.756888	0.156676	0.832405	0.0579039	0.0910341	0.899042	0.375978	0.539217	0.322774	0.642365	0.284944	0.705657	0.23174	0.75827
SMAC_01058.3_t1	748.943	0.322913	0.414349	0.391159	0.204314	1.29013	5.48511e-08	0.149887	0.674597	0.0553263	0.899913	0.0461828	0.924275	-0.0945602	0.837198	-0.103704	0.813689
SMAC_01059.3_t1	0.646599	-0.529676	NA	1.49898	NA	-0.73784	0.885296	-0.846681	0.901681	2.57767	0.663291	2.44027	NA	3.42435	NA	3.28695	0.596157
SMAC_01062.3_t1	30.7013	0.689087	0.546289	0.472498	0.618075	-0.229949	0.783869	1.59267	0.0282827	2.08484	0.00297499	1.78269	0.0189695	0.492168	0.635508	0.190014	0.870171
SMAC_01063.3_t1	670.062	-0.408904	0.366776	-0.618648	0.080537	-0.718781	0.0137916	-0.37663	0.296483	-0.135358	0.772499	0.136402	0.784818	0.241271	0.616326	0.513031	0.172432
SMAC_01064.3_t1	1226.81	0.488183	0.288951	0.683675	0.0629153	0.855456	0.00464744	-0.174066	0.694425	-0.0681205	0.899612	0.035204	0.951257	0.105945	0.853157	0.20927	0.671685
SMAC_01066.3_t1	441.932	-0.707971	0.238945	-0.935009	0.057893	-2.00923	4.78184e-07	-0.421801	0.422002	-0.147237	0.827435	0.538746	0.328599	0.274564	0.695121	0.960547	0.0479275
SMAC_01067.3_t1	183.017	-0.391968	0.4072	-0.254854	0.518268	-1.25138	2.65086e-05	0.398639	0.264137	-0.408214	0.286476	-0.532558	0.170893	-0.806853	0.0212895	-0.931197	0.0070851
SMAC_01068.3_t1	736.241	-0.0472005	0.959436	-0.866341	0.0983444	-0.502913	0.272616	-0.45349	0.414512	0.476954	0.412682	-0.144327	0.851102	0.930444	0.08501	0.309162	0.651671
SMAC_01069.3_t1	345.581	-0.680733	0.28976	-1.10546	0.0312502	0.503981	0.259015	1.37554	0.00199587	-0.0434155	0.953505	-0.400654	0.523951	-1.41895	0.00275608	-1.77619	8.08062e-05
SMAC_01070.3_t1	4065.91	0.0269527	0.974052	-0.308293	0.579473	-3.73742	1.36255e-21	0.638148	0.195629	0.143986	0.834608	0.3025	0.636601	-0.494162	0.419426	-0.335648	0.596157
SMAC_01071.3_t1	551.541	-0.106264	0.817653	0.0301235	0.931672	-0.21962	0.381413	0.423376	0.110642	0.32297	0.274477	0.634464	0.0154004	-0.100406	0.809104	0.211088	0.546279
SMAC_01072.3_t1	573.787	0.660201	0.257555	1.38885	0.00196449	1.18016	0.00222473	-0.0789648	0.902216	0.16104	0.804018	1.287	0.00257927	0.240005	0.727311	1.36596	0.00150681
SMAC_01072.3_t2	0	NA	NA	NA	NA	NA	NA	NA	NA	NA	NA	NA	NA	NA	NA	NA	NA
SMAC_01073.3_t1	13918.1	-1.24947	0.0284507	-1.7592	0.00053466	-1.42879	0.00124381	0.336957	0.588419	-0.0765126	0.922121	0.0395963	0.962592	-0.413469	0.565693	-0.29736	0.681893
SMAC_01074.3_t1	1418.06	-1.35522	0.0062945	-1.1513	0.0186546	-3.21478	3.04574e-16	-1.81655	1.70844e-05	-1.14465	0.0131512	-0.443666	0.452085	0.671899	0.231642	1.37288	0.00264153
SMAC_01075.3_t1	760.705	0.222926	0.771166	1.07201	0.0239895	0.380994	0.378937	-0.485491	0.334511	-0.19346	0.762305	0.183405	0.791281	0.29203	0.66726	0.668896	0.202254
SMAC_01076.3_t1	602.037	-0.521316	0.257951	-0.293042	0.470653	-0.260299	0.44353	-0.933206	0.00514347	-0.998136	0.00308193	-0.619358	0.105959	-0.0649296	0.917786	0.313848	0.503831
SMAC_01077.3_t1	51.1671	1.07669	0.245821	2.08213	0.00370884	-0.28639	0.70115	-0.207608	0.838163	0.0205049	0.984313	0.470518	0.640862	0.228113	0.851209	0.678126	0.488442
SMAC_01078.3_t1	176.414	0.0407415	0.988287	1.6298	0.304528	3.37368	0.00666723	-0.32735	0.871735	0.0481028	0.981363	-0.823195	0.684879	0.375453	0.876384	-0.495844	0.82419
SMAC_01079.3_t1	1771.61	0.379433	0.365509	0.549932	0.0925333	1.18312	5.73289e-06	0.565986	0.0653015	-0.455913	0.176929	-0.174325	0.688118	-1.0219	0.00059041	-0.740311	0.0178726
SMAC_01080.3_t1	435.466	-0.0390882	0.944352	-0.183354	0.592153	-0.433214	0.0933996	0.168596	0.629763	0.439511	0.149907	0.366839	0.271066	0.270915	0.477612	0.198243	0.61252
SMAC_01081.3_t1	2092.96	-0.0996328	0.862746	0.468584	0.173993	2.20982	5.46627e-17	0.00735345	0.986275	-0.217993	0.592764	-0.11564	0.813037	-0.225347	0.629597	-0.122994	0.801034
SMAC_01083.3_t1	3980	0.363836	0.433219	0.358507	0.329571	2.97542	4.71763e-28	-0.213768	0.596593	-0.474492	0.192853	-1.2771	2.62747e-05	-0.260725	0.578775	-1.06333	0.000818958
SMAC_01084.3_t1	953.037	-0.820733	0.180845	-1.48094	0.00286194	-0.763349	0.0815326	-2.4186	1.71413e-08	-2.45853	1.17199e-08	-2.20476	4.97171e-07	-0.0399262	0.962889	0.21384	0.772406
SMAC_01085.3_t1	1920.59	0.169523	0.725545	0.245338	0.46761	2.07549	1.00765e-17	-1.04967	8.69495e-05	-0.600822	0.045452	-0.888878	0.0016582	0.448848	0.197383	0.160793	0.709856
SMAC_01086.3_t1	673.792	-0.129154	0.883375	-0.580085	0.278686	-0.12894	0.798366	0.239686	0.696375	0.583717	0.288188	0.598285	0.290686	0.344032	0.623342	0.3586	0.581354
SMAC_01087.3_t1	5.45745	2.02884	0.397677	2.66942	0.139508	-2.34191	0.297216	3.53007	0.0252423	3.6492	0.0237498	2.4584	0.212598	0.119123	0.958652	-1.07167	0.578185
SMAC_01088.3_t1	434.578	0.0282243	0.979221	-0.681934	0.322508	-0.370383	0.541699	-0.29452	0.709505	-0.114282	0.904081	0.675809	0.362137	0.180238	0.859218	0.970329	0.160212
SMAC_01089.3_t1	1380.73	0.114336	0.783163	0.311214	0.245804	0.128863	0.596299	-0.303633	0.248758	-0.388536	0.142333	-0.295631	0.313473	-0.0849025	0.830691	0.00800278	0.98381
SMAC_01090.3_t1	1692.47	1.25021	0.00924662	0.759903	0.115517	-0.99842	0.0121196	0.653759	0.164315	0.88417	0.0577806	-0.167801	0.807977	0.230411	0.739866	-0.82156	0.0946345
SMAC_01091.3_t1	260.623	0.473548	0.346015	0.244461	0.582401	-0.640422	0.0583448	-0.128953	0.798355	0.601954	0.12933	0.311399	0.52185	0.730907	0.0734396	0.440352	0.343017
SMAC_01092.3_t1	902.433	0.131623	0.835717	0.530028	0.173725	0.547523	0.0913844	0.234827	0.593869	0.24521	0.593944	0.192031	0.710585	0.0103835	0.986907	-0.0427961	0.946352
SMAC_01093.3_t1	590.085	0.385542	0.323095	0.787617	0.00828329	0.89317	0.000311027	0.238632	0.477019	-0.0747232	0.865213	-0.0494841	0.921622	-0.313355	0.405945	-0.288116	0.444453
SMAC_01094.3_t1	1712.58	0.221247	0.69692	0.312604	0.436846	0.21716	0.528578	-0.589971	0.0982051	-0.225527	0.619777	-0.574265	0.138384	0.364444	0.429924	0.0157068	0.979307
SMAC_01095.3_t1	415.37	0.183752	0.683416	-0.00141157	0.996775	0.901758	0.000140938	0.672232	0.0110503	0.00396193	0.992609	0.0997395	0.819747	-0.66827	0.0211896	-0.572493	0.0560698
SMAC_01096.3_t1	443.309	0.181242	0.772615	0.209192	0.64473	1.46763	2.75372e-06	0.19832	0.671253	-0.106321	0.848795	-0.00768952	0.989389	-0.30464	0.560198	-0.206009	0.704861
SMAC_01097.3_t1	1161.45	0.370399	0.406842	0.182738	0.639481	0.656692	0.0198611	0.0516338	0.911344	0.120094	0.794379	-0.254747	0.546436	0.0684603	0.900992	-0.306381	0.460874
SMAC_01098.3_t1	1187.17	0.43376	0.223162	-0.459876	0.124186	-1.86577	2.62199e-15	0.152362	0.660768	0.383987	0.210812	-0.091273	0.833462	0.231625	0.549386	-0.243635	0.506794
SMAC_01099.3_t1	18.495	1.66388	0.1297	-3.67518	0.0603503	3.28174	8.64342e-06	0.690922	0.527536	0.520149	0.672145	0.339149	0.828327	-0.170773	0.916191	-0.351773	0.818413
SMAC_01100.3_t1	719.584	0.26018	0.729194	-0.774215	0.114111	-8.73139	1.72786e-30	-1.48819	0.000417216	-0.0912284	0.89792	-0.432832	0.453446	1.39696	0.00207248	1.05535	0.0254303
SMAC_01101.3_t1	485.658	1.63656	6.13587e-09	0.140905	0.725875	-0.772022	0.00683812	2.10165	8.96697e-16	2.73386	2.43599e-26	0.128749	0.793146	0.632213	0.0502	-1.9729	7.84826e-13
SMAC_01102.3_t1	573.537	2.18169	5.31517e-12	0.668163	0.0799887	1.45836	1.35795e-06	0.370953	0.351355	1.86583	1.73142e-09	-0.338193	0.47143	1.49488	4.68145e-06	-0.709146	0.0740917
SMAC_01103.3_t1	327.471	0.33006	0.432863	-0.0718993	0.853804	0.0524393	0.869573	-1.10902	6.35827e-05	-0.103281	0.811567	-1.23263	2.17879e-05	1.00574	0.000789727	-0.123609	0.804517
SMAC_01104.3_t1	470.459	0.501375	0.22789	-0.382228	0.290474	-1.3758	9.51671e-07	-0.778211	0.0129352	0.2233	0.58706	-0.253081	0.555651	1.00151	0.00183928	0.52513	0.158182
SMAC_01105.3_t1	2903.36	0.0551956	0.9552	-0.726419	0.182445	-3.04219	6.35395e-13	-0.910702	0.0718588	-0.260735	0.702063	-0.805366	0.147432	0.649968	0.294231	0.105336	0.899449
SMAC_01106.3_t1	382.837	0.112961	0.799399	0.276064	0.332647	-0.115665	0.653305	0.0276329	0.939842	-0.180061	0.578033	-0.136678	0.715989	-0.207694	0.566664	-0.164311	0.656156
SMAC_01107.3_t1	849.098	0.615654	0.239157	0.216536	0.663509	-2.66517	3.74431e-14	0.880255	0.0247872	1.23238	0.00114673	1.01253	0.0112611	0.352125	0.5266	0.132273	0.832176
SMAC_01108.3_t1	9791.67	-0.0768186	0.925416	-0.595818	0.198757	0.0763866	0.866761	-0.507666	0.270956	-0.316876	0.551541	-0.766869	0.0935149	0.19079	0.774961	-0.259203	0.665397
SMAC_01109.3_t1	169.352	-0.846017	0.142219	-0.925495	0.0645366	0.471259	0.262893	1.7469	1.22263e-05	0.0729678	0.915874	0.208479	0.760915	-1.67393	7.01288e-05	-1.53842	0.000334174
SMAC_01110.3_t1	779.325	0.0323916	0.962759	-0.270762	0.528561	-0.297095	0.399349	-0.674435	0.0683481	-0.491423	0.233701	-0.941033	0.010485	0.183012	0.748683	-0.266598	0.598884
SMAC_01111.3_t1	52.5699	0.18354	0.864385	0.712882	0.264327	0.568324	0.293273	1.33247	0.0132978	1.00859	0.0893209	1.96763	0.00015496	-0.323884	0.696562	0.635162	0.344485
SMAC_01112.3_t1	2296.96	0.260188	0.68242	0.809879	0.0525984	-1.27564	0.00018544	0.398661	0.366511	0.63011	0.139664	0.934554	0.018518	0.231448	0.69874	0.535893	0.246198
SMAC_01113.3_t1	411.751	2.1134	1.74405e-05	1.44878	0.00622581	-0.637494	0.18665	-0.046653	0.950133	1.79189	0.000161096	1.14325	0.0305586	1.83855	0.000191025	1.18991	0.0256476
SMAC_01114.3_t1	162.222	1.11868	0.0924514	0.0765554	0.918791	-2.91135	1.13688e-07	0.0784909	0.923459	1.92698	0.000154038	1.0978	0.0617854	1.84849	0.000574102	1.0193	0.0953815
SMAC_01116.3_t1	668.495	0.86286	0.100761	1.10386	0.0152829	-2.3081	1.33362e-09	-0.0714671	0.910685	0.586605	0.231552	0.0616154	0.934409	0.658072	0.203747	0.133082	0.846883
SMAC_01118.3_t1	1346.31	1.52248	0.0142285	1.11062	0.0689417	0.620036	0.24629	-1.17365	0.0390906	1.41828	0.0119514	0.661583	0.337215	2.59194	7.66351e-07	1.83523	0.000861512
SMAC_01119.3_t1	375.13	0.0413762	0.955876	0.338538	0.447758	1.58128	1.20747e-06	-0.271041	0.562788	0.478719	0.274611	0.399615	0.404678	0.74976	0.0796758	0.670656	0.123516
SMAC_01120.3_t1	138.699	0.149259	0.867246	-0.916463	0.0909384	-3.21407	1.42528e-11	-0.366343	0.536412	-0.176818	0.806509	0.252153	0.728294	0.189525	0.812684	0.618496	0.309394
SMAC_01121.3_t1	316.222	-0.735653	0.256055	0.156189	0.806269	0.23045	0.640123	-0.244843	0.696309	-0.930221	0.0708347	0.39541	0.53738	-0.685379	0.250948	0.640253	0.27581
SMAC_01122.3_t1	29.3985	-0.586356	0.527888	-0.473895	0.519631	-1.15207	0.0470036	-0.558456	0.430443	-0.126506	0.891951	0.109529	0.918288	0.43195	0.642596	0.667985	0.416272
SMAC_01124.3_t1	606.69	0.556268	0.286233	0.275032	0.551833	0.950431	0.00558955	-0.212292	0.669494	-0.103304	0.862654	-0.0203393	0.975097	0.108987	0.868971	0.191952	0.741916
SMAC_01125.3_t1	1703.39	-1.27861	0.00145964	-1.09183	0.00719155	-3.28645	5.7361e-23	2.11359	4.8451e-10	-1.06937	0.00480077	-1.39024	0.000146266	-3.18296	1.71173e-21	-3.50383	4.70761e-26
SMAC_01126.3_t1	2385.69	0.46918	0.236849	0.451222	0.173725	1.15132	1.04567e-05	-0.572327	0.0626151	-0.282785	0.442253	-0.601384	0.064105	0.289542	0.488416	-0.0290575	0.95555
SMAC_01127.3_t1	283.61	-1.86926	1.45148e-05	-1.23368	0.00707684	-5.20176	2.49301e-27	1.2496	0.00198172	-1.07354	0.0131244	-0.673192	0.174752	-2.32313	2.28242e-09	-1.92279	1.52848e-06
SMAC_01128.3_t1	26.3009	-0.714361	0.598941	1.37483	0.122343	-4.34783	0.000831375	1.446	0.0819166	-1.17748	0.242813	0.877424	0.400074	-2.62348	0.00275608	-0.568575	0.617736
SMAC_01129.3_t1	33.4281	-0.383836	0.756707	1.92348	0.00525501	-4.30503	0.000473532	1.71442	0.00708595	-0.680344	0.438771	1.37246	0.0581532	-2.39477	0.000509634	-0.34196	0.723747
SMAC_01130.3_t1	377.553	-1.04973	0.180607	-0.649239	0.351861	-5.97483	6.08143e-23	-2.50318	9.15038e-06	-1.15814	0.0752433	0.394312	0.643688	1.34504	0.0474351	2.89749	2.95733e-07
SMAC_01131.3_t1	48.1513	0.309297	0.725545	-0.352542	0.591031	-1.27517	0.0109348	-0.124278	0.870011	-0.599178	0.344817	-0.352018	0.650708	-0.4749	0.53696	-0.22774	0.793447
SMAC_01132.3_t1	1698.82	-0.856713	0.116956	-0.443455	0.382926	-3.78033	2.93702e-23	0.444023	0.377422	0.0672399	0.922121	0.360571	0.537714	-0.376783	0.547598	-0.0834514	0.911178
SMAC_01133.3_t1	611.949	0.0979115	0.87663	-0.00754948	0.9868	-0.0911577	0.801283	1.23295	7.09065e-05	0.360423	0.373078	0.174008	0.730599	-0.872531	0.013344	-1.05895	0.00147569
SMAC_01134.3_t1	2950.22	-0.525193	0.139614	-0.408583	0.193945	-0.807422	0.0012894	-0.559251	0.0516212	-0.456189	0.145237	-0.174172	0.665212	0.103062	0.824264	0.385079	0.259486
SMAC_01135.3_t1	57.019	-1.13175	0.17241	1.19933	0.049116	-1.32311	0.0238348	1.9225	0.000186167	0.826617	0.192853	1.94415	0.000253793	-1.09588	0.0717186	0.0216541	0.98104
SMAC_01136.3_t1	734.133	-0.358546	0.470783	0.502161	0.180308	0.298938	0.364261	-1.14537	0.00036285	-0.671238	0.063003	0.126012	0.812954	0.474129	0.267175	1.27138	0.000108499
SMAC_01137.3_t1	791.939	-0.0848311	0.875019	-0.43983	0.171702	-1.44556	1.16424e-08	-0.349277	0.27696	-0.332732	0.332687	-0.532427	0.0981899	0.0165448	0.975525	-0.18315	0.664673
SMAC_01138.3_t1	432.883	-0.0323001	0.962759	0.0246143	0.9591	0.869089	0.00638594	0.205733	0.652716	0.168849	0.740009	0.122243	0.831871	-0.0368848	0.955057	-0.0834902	0.891012
SMAC_01139.3_t1	864.13	0.765655	0.201142	1.76918	0.000113254	-3.84396	8.34736e-18	1.99593	1.70227e-06	1.70271	7.63247e-05	2.47875	1.57376e-09	-0.293221	0.67405	0.482817	0.410873
SMAC_01140.3_t1	111.669	-1.34827	0.000337869	-0.8759	0.0228823	-0.745089	0.0187776	0.999791	0.00154961	-0.757363	0.0358534	-0.759697	0.0536571	-1.75715	2.52462e-08	-1.75949	1.47571e-07
SMAC_01141.3_t1	26.3946	-0.309891	0.824231	-1.37483	0.142926	-2.98744	0.00135391	2.07722	0.00223425	1.28647	0.0980589	-0.781999	0.474152	-0.790755	0.384618	-2.85922	0.000297989
SMAC_01142.3_t1	467.11	-0.248982	0.729708	0.290841	0.573677	-1.04236	0.00684123	0.143611	0.807853	-0.0267515	0.967647	0.935763	0.0363417	-0.170362	0.806481	0.792152	0.0946021
SMAC_01143.3_t1	2341.93	0.188034	0.760972	0.13348	0.779802	0.24602	0.494305	-0.0351093	0.947209	0.0490248	0.928915	-0.290642	0.548524	0.0841341	0.893027	-0.255533	0.61252
SMAC_01144.3_t1	174.006	0.350429	0.532414	-0.583018	0.171586	-1.29278	0.000179022	-0.244869	0.60542	1.11744	0.00172034	-0.0792619	0.903074	1.36231	0.000184538	0.165607	0.78377
SMAC_01145.3_t1	760.015	0.0999529	0.878959	-0.0501304	0.917335	0.44241	0.180498	0.641404	0.0762248	0.0326487	0.953505	0.509407	0.21545	-0.608755	0.137709	-0.131996	0.810994
SMAC_01146.3_t1	1517.52	0.429739	0.406416	0.69677	0.0772544	0.311228	0.379048	-0.195983	0.67598	-0.159735	0.75921	-0.472075	0.279566	0.0362479	0.956666	-0.276092	0.583418
SMAC_01147.3_t1	225.42	0.513515	0.386917	0.751503	0.10026	0.269003	0.52348	0.425602	0.375029	-0.0591415	0.927607	-0.39054	0.489566	-0.484743	0.3773	-0.816141	0.0888756
SMAC_01148.3_t1	625.156	0.413298	0.469376	0.38318	0.399907	0.213369	0.592037	0.247959	0.614447	-0.45205	0.331298	0.0168423	0.979863	-0.700009	0.122967	-0.231117	0.6882
SMAC_01149.3_t1	590.686	-0.395969	0.432768	-0.648908	0.090291	-0.0411962	0.916235	-0.1797	0.692665	-0.155733	0.755263	-0.241109	0.621167	0.0239669	0.969573	-0.0614092	0.92037
SMAC_01150.3_t1	563.513	-0.458703	0.514284	-1.21685	0.015856	-2.39078	6.96907e-09	-0.451856	0.408578	-0.634366	0.241679	-0.402976	0.51859	-0.18251	0.813024	0.0488795	0.952425
SMAC_01151.3_t1	1097.25	0.0173705	0.978859	0.0833397	0.861155	1.20087	0.000131504	-0.322754	0.4436	-0.00659625	0.990865	-0.0639317	0.918659	0.316158	0.536684	0.258822	0.60636
SMAC_01152.3_t1	655.602	-0.528311	0.507845	-1.37487	0.0167732	-0.173666	0.757674	0.510775	0.409511	0.932653	0.108276	0.999935	0.086769	0.421878	0.588741	0.48916	0.493034
SMAC_01153.3_t1	399.017	-0.078852	0.891582	-0.548394	0.10527	0.252739	0.395739	-0.0270838	0.951675	0.0267197	0.956408	-0.0722962	0.886612	0.0538036	0.922224	-0.0452124	0.934866
SMAC_01154.3_t1	1130.15	-0.20831	0.650321	0.147903	0.684298	0.271216	0.325057	-0.211531	0.545106	-0.0920293	0.829894	0.300348	0.404412	0.119501	0.796492	0.511879	0.113258
SMAC_01156.3_t1	3.12586	-0.313458	NA	1.48631	0.443028	-3.36977	0.120115	0.914838	0.669706	1.03545	0.639309	1.63404	NA	0.120615	NA	0.719204	0.774563
SMAC_01157.3_t1	555.443	0.176213	0.756326	-0.503571	0.173725	-1.11524	0.000157986	-0.581434	0.0929176	-0.395458	0.313291	-0.635871	0.0845432	0.185975	0.724537	-0.0544372	0.928241
SMAC_01158.3_t1	2570.44	0.224986	0.648053	0.0471569	0.910114	1.44479	5.5972e-08	-0.667441	0.0307478	-0.686704	0.0312503	-1.03537	0.000499178	-0.0192625	0.973375	-0.367924	0.345771
SMAC_01159.3_t1	2345.62	0.306317	0.563793	0.683337	0.0718067	1.4651	1.32937e-06	-0.328674	0.418441	-0.810141	0.0235789	-0.828749	0.0224498	-0.481466	0.268594	-0.500075	0.231954
SMAC_01160.3_t1	64.4466	0.402248	0.635431	0.937653	0.103402	0.639672	0.198371	0.592217	0.316721	1.35203	0.00873319	0.620021	0.354135	0.759809	0.227107	0.027804	0.976984
SMAC_01161.3_t1	770.267	-0.168695	0.808408	-0.0438684	0.933742	0.890995	0.0108413	-0.54194	0.199877	0.60233	0.166597	0.10001	0.87543	1.14427	0.00431415	0.64195	0.155412
SMAC_01162.3_t1	68.8915	1.23788	0.0399024	1.73447	0.000839929	-0.521311	0.36003	2.13305	2.35538e-06	2.99264	3.83506e-12	2.48285	4.49337e-08	0.859591	0.0930565	0.349798	0.588293
SMAC_01163.3_t1	993.876	-0.269496	0.708059	-0.942163	0.0427615	-0.286777	0.5052	-0.5509	0.242871	-0.278173	0.62645	-0.468526	0.38209	0.272727	0.679689	0.0823737	0.910897
SMAC_01165.3_t1	1515.51	0.844475	0.0605177	0.534007	0.204814	1.36181	3.8059e-05	-0.707402	0.0695647	-0.288302	0.55128	-0.598542	0.168746	0.4191	0.406044	0.10886	0.859624
SMAC_01166.3_t1	3869.97	0.161787	0.611024	-0.238068	0.306074	-0.359381	0.0537987	0.417787	0.0418867	0.348475	0.117465	0.132248	0.645067	-0.0693118	0.837198	-0.285539	0.241154
SMAC_01167.3_t1	1223.96	-0.393561	0.510346	-0.940061	0.0294595	-3.35512	4.45753e-22	-0.613627	0.149028	0.0594769	0.923437	-0.510174	0.291148	0.673104	0.154047	0.103453	0.876194
SMAC_01168.3_t1	310.291	0.100038	0.881843	0.108593	0.821007	0.908321	0.00443773	0.0454718	0.93233	-0.10375	0.851859	0.633768	0.115193	-0.149222	0.799754	0.588296	0.159238
SMAC_01169.3_t1	351.978	-0.315784	0.550176	0.172408	0.697218	-2.08064	2.37715e-11	-1.34128	4.19577e-05	-0.605461	0.112324	0.325201	0.47341	0.735818	0.0643901	1.66648	3.84579e-07
SMAC_01170.3_t1	40.6522	-0.171839	0.888004	0.450466	0.541601	-4.08625	0.000663501	2.30245	8.75106e-06	1.84338	0.000713092	2.37583	7.86568e-06	-0.459069	0.545169	0.0733844	0.939724
SMAC_01171.3_t1	757.923	0.375045	0.498032	0.222281	0.632164	0.192229	0.614509	-0.612451	0.119384	-0.37427	0.412381	-0.585883	0.175483	0.238181	0.679803	0.0265677	0.967954
SMAC_01172.3_t1	140.031	0.229875	0.813757	0.274398	0.694305	-0.120238	0.841524	0.409741	0.536489	0.796775	0.193654	0.540903	0.442815	0.387034	0.634224	0.131162	0.886072
SMAC_01173.3_t1	33.706	1.01953	0.24378	1.03299	0.156943	-1.14036	0.101702	-0.00913762	0.992335	2.19672	0.000255645	0.8507	0.299502	2.20586	0.00065389	0.859838	0.319033
SMAC_01174.3_t1	567.117	1.29955	0.00230664	-0.245788	0.627168	-0.263223	0.519996	-1.47999	0.000113705	0.979676	0.0169623	-2.23112	8.18435e-09	2.45967	2.81254e-11	-0.751131	0.129771
SMAC_01175.3_t1	25.5213	0.203837	0.892378	0.32069	0.756989	0.555736	0.472902	0.690265	0.445617	1.8005	0.0182768	0.340375	0.788228	1.11023	0.222597	-0.349889	0.779795
SMAC_01176.3_t1	506.748	-0.28436	0.78125	0.524921	0.446951	0.000203858	0.999765	-1.88468	0.000767205	-1.54848	0.00869796	-1.67779	0.00446543	0.3362	0.719542	0.206891	0.827579
SMAC_01178.3_t1	5.74972	-1.15368	0.696718	-3.54531	0.13873	-3.7843	0.0571541	3.33045	0.0087286	1.53213	0.33975	0.726446	0.748372	-1.79832	0.227433	-2.60401	0.0894249
SMAC_01179.3_t1	2269.24	-0.340447	0.69126	0.112774	0.87106	-8.89902	2.08277e-61	-2.54705	4.75547e-08	-3.7821	1.05761e-16	-3.38232	1.92322e-13	-1.23505	0.0281671	-0.835268	0.166061
SMAC_01180.3_t1	345.306	0.882205	0.0560393	0.765864	0.070924	-0.592153	0.105728	-0.196124	0.703099	0.766668	0.063003	0.232431	0.681547	0.962792	0.0211896	0.428555	0.4003
SMAC_01181.3_t1	474.652	-0.242636	0.523387	-0.148826	0.638079	0.277082	0.245354	-0.03627	0.922912	-0.143888	0.673661	0.363878	0.218597	-0.107618	0.792848	0.400148	0.176035
SMAC_01182.3_t1	463.113	-0.173059	0.734221	-0.374025	0.274012	0.161869	0.594516	0.156828	0.685507	0.189429	0.63374	0.499418	0.138704	0.0326015	0.952878	0.34259	0.37011
SMAC_01183.3_t1	583.678	-0.254492	0.669826	-0.638336	0.113256	-0.440927	0.202101	-0.211213	0.65024	0.489432	0.241633	0.888131	0.0174881	0.700645	0.0902158	1.09934	0.00246409
SMAC_01184.3_t1	313.852	-0.295871	0.563793	-0.346953	0.373482	0.931805	0.00141713	0.250904	0.532897	0.157683	0.737678	0.519916	0.174757	-0.0932212	0.869626	0.269012	0.556818
SMAC_01185.3_t1	85.6529	-0.114865	0.900323	-0.669527	0.227944	0.586322	0.190118	-0.602354	0.263784	-0.485888	0.411347	0.0293714	0.971399	0.116466	0.892411	0.631725	0.309394
SMAC_01186.3_t1	471.872	0.014111	0.979732	0.757415	0.022644	0.397666	0.172915	0.00951761	0.982506	-0.0336439	0.944726	0.235848	0.581509	-0.0431615	0.939105	0.22633	0.606876
SMAC_01187.3_t1	969.245	-0.496809	0.193954	0.241748	0.487163	0.0159202	0.960302	-1.77014	1.55378e-11	-3.0866	2.62479e-32	-1.77627	3.33807e-11	-1.31647	6.25434e-06	-0.00613342	0.989675
SMAC_01188.3_t1	225.379	2.1578	1.74405e-05	-0.675893	0.26152	-0.281842	0.598232	0.150882	0.838526	2.33364	5.91883e-07	-0.832992	0.185081	2.18276	6.9972e-06	-0.983873	0.109741
SMAC_01189.3_t1	65.6906	3.73533	5.51235e-11	0.62719	0.436529	3.34247	4.25632e-10	-1.04496	0.220614	3.40285	8.39436e-10	0.116687	0.927905	4.44782	1.94745e-11	1.16165	0.257153
SMAC_01190.3_t1	31.4331	0.0201469	0.987879	0.159697	0.856412	1.61621	0.00369597	0.840491	0.224418	-0.09625	0.924444	0.412757	0.666504	-0.936741	0.240195	-0.427734	0.653703
SMAC_01191.3_t1	1701.67	-0.294822	0.69692	-0.81548	0.102376	1.78474	7.08545e-06	-1.88128	7.61935e-06	-1.67969	9.60617e-05	-2.38671	1.02347e-08	0.201592	0.786556	-0.505435	0.396138
SMAC_01192.3_t1	166.796	-0.439748	0.666101	-0.0737869	0.930062	4.7508	1.22305e-22	0.484088	0.498717	-0.442247	0.579313	-0.595031	0.488236	-0.926336	0.213563	-1.07912	0.15255
SMAC_01193.3_t1	85.0963	1.21868	0.273732	0.887622	0.353044	4.08947	4.75455e-09	-0.626244	0.553084	0.804053	0.426759	-2.06579	0.0662478	1.4303	0.156288	-1.43955	0.263458
SMAC_01194.3_t1	163.951	-0.321729	0.812856	1.35554	0.0737038	6.02447	4.49397e-27	1.8536	0.00482899	0.700829	0.412163	-1.89137	0.0902896	-1.15277	0.142817	-3.74497	8.25211e-05
SMAC_01195.3_t1	24.3313	-1.06169	0.461097	-1.32048	0.256039	3.07449	2.18042e-06	2.42655	0.000634987	2.15865	0.00356833	-0.331954	0.827367	-0.267895	0.813723	-2.7585	0.00229146
SMAC_01196.3_t1	109.906	-0.141494	0.859167	-0.19388	0.730698	0.11415	0.802623	1.41348	0.000261004	0.955221	0.0247999	-0.0452654	0.951572	-0.458261	0.394868	-1.45875	0.000572458
SMAC_01197.3_t1	44.3101	1.00822	0.332278	0.433691	0.66445	5.24185	1.71178e-20	-0.717777	0.497488	0.887731	0.304502	-0.501174	0.729815	1.60551	0.102013	0.216603	0.905373
SMAC_01198.3_t1	183.769	-1.54183	0.0239512	-1.23846	0.0566904	1.31713	0.0121263	-0.113417	0.89615	-0.792735	0.244062	-1.0794	0.105392	-0.679319	0.381638	-0.965978	0.16595
SMAC_01201.3_t1	413.402	0.481222	0.273732	0.498971	0.167728	0.03967	0.914196	0.795388	0.012503	0.880049	0.00608392	0.258122	0.562012	0.0846602	0.878703	-0.537267	0.155315
SMAC_01202.3_t1	338.041	0.425541	0.46668	0.651828	0.13874	1.48939	1.65328e-05	0.137354	0.803751	0.686321	0.114104	0.752332	0.0866912	0.548967	0.268365	0.614978	0.191161
SMAC_01203.3_t1	2249.06	0.403243	0.165901	-0.0599758	0.843128	0.539948	0.00817484	-0.245933	0.342299	0.0494542	0.890081	-0.239767	0.407644	0.295388	0.308338	0.00616608	0.986073
SMAC_01203.3_t2	0	NA	NA	NA	NA	NA	NA	NA	NA	NA	NA	NA	NA	NA	NA	NA	NA
SMAC_01204.3_t1	2572.62	-0.607851	0.170294	-1.49427	1.1507e-05	-2.90923	9.7858e-23	0.0541761	0.916609	-0.222915	0.629246	0.0898535	0.872923	-0.277091	0.583856	0.0356774	0.952513
SMAC_01205.3_t1	6086.94	0.268915	0.710274	0.715475	0.131487	0.583671	0.14736	0.0977873	0.875836	-0.531394	0.293149	-0.331984	0.569595	-0.629181	0.232647	-0.429771	0.445997
SMAC_01206.3_t1	7893.5	1.12582	0.0548318	-0.0354749	0.957639	-1.74547	5.93387e-05	-0.890124	0.0820494	0.591472	0.310683	-0.604334	0.316141	1.4816	0.00334669	0.28579	0.694659
SMAC_01207.3_t1	16.9147	0.968533	0.43925	1.06835	0.274571	-1.34704	0.197296	1.54862	0.0685369	2.72082	0.000351602	2.0248	0.0192578	1.17221	0.194264	0.476187	0.679328
SMAC_01208.3_t1	12.3847	-2.64669	0.100761	-2.43875	0.0807099	-6.51405	0.000282728	1.1965	0.308787	0.0439911	0.97942	-0.789647	0.621167	-1.15251	0.412565	-1.98615	0.123738
SMAC_01209.3_t1	190.71	-2.50406	7.64331e-13	-2.19992	3.92414e-10	-3.38247	1.20834e-22	0.211703	0.62643	0.226234	0.619559	-0.777325	0.0397499	0.0145311	0.980816	-0.989028	0.00658419
SMAC_01210.3_t1	1512.22	-0.028736	0.962759	-0.734132	0.0330379	3.44607	2.84746e-39	0.275292	0.458854	0.261529	0.509913	-0.360773	0.362092	-0.0137626	0.980134	-0.636064	0.0701419
SMAC_01211.3_t1	1366.82	0.212207	0.729194	0.68568	0.0831368	1.77331	1.5244e-08	0.17369	0.71802	-0.205939	0.679266	-0.161131	0.774492	-0.379629	0.441324	-0.334821	0.494284
SMAC_01212.3_t1	296.164	0.350868	0.645526	1.02683	0.0455579	0.394597	0.397618	-0.272648	0.656415	0.0177382	0.980539	0.122056	0.875967	0.290387	0.695809	0.394704	0.550789
SMAC_01213.3_t1	868.328	0.261641	0.507845	0.254661	0.41142	0.513147	0.0325689	-0.0118351	0.974649	0.0264991	0.949682	-0.0297595	0.947386	0.0383341	0.936133	-0.0179244	0.969924
SMAC_01214.3_t1	1075.89	0.421689	0.331908	0.048233	0.910118	0.690137	0.0144999	1.03435	0.000446637	0.720979	0.0247119	0.0504761	0.926816	-0.313374	0.464951	-0.983877	0.00157591
SMAC_01215.3_t1	3774.34	0.255948	0.555003	0.559202	0.0727886	1.0171	4.99084e-05	-0.451047	0.135607	-0.430279	0.182719	-0.314439	0.37869	0.0207684	0.96805	0.136608	0.752197
SMAC_01216.3_t1	1226.7	0.313081	0.4857	-0.446603	0.187633	-10.4645	4.06792e-22	-0.163765	0.677379	0.33545	0.357402	0.0643118	0.900702	0.499216	0.16589	0.228077	0.589351
SMAC_01217.3_t1	159.246	0.755112	0.101802	0.361701	0.413663	-3.16516	5.0826e-14	0.232992	0.624374	0.984012	0.00771441	0.812958	0.0424158	0.75102	0.0726005	0.579965	0.192912
SMAC_01218.3_t1	70.1837	0.00818432	0.991956	-0.45072	0.394999	-0.10242	0.831859	-0.162095	0.789337	0.27069	0.641014	0.126703	0.862214	0.432785	0.480035	0.288799	0.663229
SMAC_01219.3_t1	972.517	1.2125	0.000285528	0.509945	0.164372	1.92109	1.00092e-11	-0.0195032	0.965651	0.0633232	0.903704	-0.773805	0.0281471	0.0828264	0.885077	-0.754302	0.0364335
SMAC_01220.3_t1	384.696	-3.05594	4.02305e-11	-3.97289	5.29679e-15	-4.89973	3.2377e-20	3.22597	1.07712e-17	0.632662	0.201958	-3.15379	3.86479e-11	-2.5933	2.71464e-11	-6.37976	3.81239e-45
SMAC_01221.3_t1	1.9632	0.90167	NA	-1.94495	0.480257	-1.0967	0.60699	0.825844	0.728102	-0.779035	0.787941	-0.498583	NA	-1.60488	NA	-1.32443	0.660648
SMAC_01222.3_t1	21.6658	-0.283939	0.842321	-0.83651	0.377141	-0.98983	0.197426	0.13812	0.902216	0.238003	0.835313	0.7211	0.472225	0.0998834	0.941571	0.58298	0.589137
SMAC_01223.3_t1	963.506	0.41259	0.557681	0.611498	0.239971	0.886977	0.0352872	0.742126	0.127965	-0.919541	0.063003	-0.928202	0.0665664	-1.66167	0.000273853	-1.67033	0.000202724
SMAC_01224.3_t1	1057.92	-0.282398	0.413497	-0.201202	0.481527	-0.519209	0.0171563	-0.206178	0.469007	-0.287968	0.309267	-0.0598919	0.878931	-0.0817898	0.838174	0.146286	0.678795
SMAC_01226.3_t1	0.401646	0.869015	NA	2.77489	NA	0.660852	0.923227	3.00078	0.698635	1.81465	0.843909	2.74841	NA	-1.18613	NA	-0.252373	0.980559
SMAC_01227.3_t1	25.8543	-1.64905	0.0710736	-3.21112	0.000574628	-3.3679	2.26744e-05	0.20187	0.836273	0.695846	0.39938	-2.86217	0.00181527	0.493976	0.62926	-3.06404	0.000878259
SMAC_01228.3_t1	331.136	-0.812431	0.141274	-0.540207	0.275403	1.03967	0.0073211	-2.28869	1.14017e-08	-2.46485	8.09889e-10	-2.00595	1.58447e-06	-0.176168	0.816182	0.282732	0.677896
SMAC_01229.3_t1	93.3494	0.517502	0.483466	0.84772	0.119921	2.47074	3.14748e-09	-0.821154	0.135607	-1.02774	0.0654886	-0.761858	0.239764	-0.206583	0.818341	0.0592961	0.952425
SMAC_01230.3_t1	921.326	-0.17899	0.748267	-0.450394	0.220521	0.56688	0.0579039	0.357208	0.333293	0.140828	0.764756	-0.377301	0.354319	-0.21638	0.66276	-0.734509	0.0362098
SMAC_01231.3_t1	1617.2	0.162139	0.717414	-0.234603	0.455144	0.388537	0.114817	-0.304836	0.307394	-0.24696	0.449957	-0.497695	0.0905682	0.057875	0.901999	-0.192859	0.606053
SMAC_01232.3_t1	416.375	-0.788157	0.351298	-1.48802	0.0234264	-0.828546	0.144625	0.0912274	0.919656	0.0682578	0.942161	0.64523	0.396051	-0.0229697	0.983109	0.554003	0.495158
SMAC_01233.3_t1	2798.16	-0.0207568	0.968511	-0.488531	0.112668	-0.323508	0.224707	-0.557	0.051214	-0.244188	0.484644	0.0495946	0.919187	0.312812	0.400579	0.606595	0.0439386
SMAC_01234.3_t1	1403.74	1.07337	0.000100338	-0.0488866	0.896867	-0.154271	0.584765	-0.631117	0.0226421	0.299705	0.368699	-0.308947	0.37314	0.930821	0.000789727	0.32217	0.366345
SMAC_01235.3_t1	132.28	1.59633	0.113469	1.96366	0.0240304	0.614616	0.448246	1.7191	0.0352028	1.78498	0.0336266	1.13764	0.238577	0.0658797	0.963038	-0.581463	0.60762
SMAC_01236.3_t1	201.787	-0.296738	0.80535	0.941523	0.209944	-10.4419	1.05888e-10	-2.36234	0.000275436	-0.536946	0.531021	-0.0051108	0.99598	1.82539	0.012579	2.35723	0.000477609
SMAC_01237.3_t1	2194.42	0.00757376	0.991733	-0.0352063	0.948209	-4.20467	4.96097e-33	1.02507	0.00791306	1.24325	0.00112205	1.11392	0.00457865	0.218175	0.726357	0.0888479	0.89489
SMAC_01238.3_t1	280.844	-0.333906	0.591897	0.447547	0.324722	-1.15977	0.0013768	0.616566	0.140218	0.889641	0.028615	0.56075	0.231907	0.273075	0.64706	-0.0558163	0.937864
SMAC_01239.3_t1	569.209	-0.14522	0.836422	0.189226	0.704277	-0.0923506	0.827847	0.257382	0.598422	-0.174694	0.755247	-0.575489	0.210723	-0.432076	0.404286	-0.832872	0.0500229
SMAC_01239.3_t2	0	NA	NA	NA	NA	NA	NA	NA	NA	NA	NA	NA	NA	NA	NA	NA	NA
SMAC_01240.3_t1	1483.17	-0.266835	0.772991	0.552081	0.370728	-0.923819	0.060166	1.86552	0.000189039	-0.57551	0.372987	-1.35277	0.0138065	-2.44103	9.8168e-07	-3.21829	2.07527e-11
SMAC_01240.3_t2	0	NA	NA	NA	NA	NA	NA	NA	NA	NA	NA	NA	NA	NA	NA	NA	NA
SMAC_01241.3_t1	519.973	0.457077	0.493907	0.697173	0.163074	0.775691	0.0603187	-0.164003	0.792885	-0.299021	0.618167	-0.377052	0.535138	-0.135018	0.860212	-0.21305	0.757552
SMAC_01242.3_t1	1387.97	0.21171	0.712503	0.05789	0.901442	-0.688155	0.0268854	0.664155	0.0560595	1.12803	0.000519438	1.15064	0.000423721	0.463872	0.274424	0.486483	0.229808
SMAC_01243.3_t1	598.213	-0.331059	0.686648	-1.24652	0.0200127	-0.4542	0.346366	0.466863	0.417714	0.419101	0.499605	0.580608	0.340427	-0.047762	0.958205	0.113744	0.891707
SMAC_01244.3_t1	453.402	-1.69506	0.0120989	-1.58917	0.0150536	-1.92341	0.000380689	-3.03923	4.30279e-08	-1.98022	0.000762462	-2.68221	2.55091e-06	1.05901	0.144799	0.357015	0.698786
SMAC_01245.3_t1	1228.11	-0.0118651	0.979297	-0.0534032	0.877485	-0.26899	0.273733	-0.425317	0.113274	-0.133411	0.708499	-0.0460928	0.918288	0.291906	0.38715	0.379224	0.213934
SMAC_01246.3_t1	1484.07	0.199055	0.68635	-0.0689625	0.862796	2.70694	2.5429e-27	-0.480806	0.126781	-0.315257	0.383253	-1.18275	3.69721e-05	0.165548	0.72666	-0.701943	0.0308925
SMAC_01247.3_t1	465.634	0.948352	0.0700331	0.0869914	0.88296	-1.10015	0.00521427	-1.30681	0.00194674	-0.135983	0.836405	-0.32121	0.593683	1.17083	0.0117133	0.985603	0.0374738
SMAC_01248.3_t1	779.826	0.171808	0.826086	-0.427381	0.399907	-0.651735	0.106644	-0.095953	0.879345	0.248118	0.674916	0.454605	0.407505	0.34407	0.589492	0.550557	0.305627
SMAC_01249.3_t1	745.209	0.752169	0.0702417	0.425752	0.277376	-0.0250257	0.946883	-0.263139	0.531823	0.308396	0.471177	0.293612	0.523386	0.571535	0.164149	0.556751	0.166352
SMAC_01250.3_t1	3081.85	-0.0816845	0.883966	-0.310514	0.368952	-2.12306	1.87789e-16	0.941193	0.000871463	1.29328	2.4538e-06	1.40848	2.13389e-07	0.352087	0.36392	0.467292	0.176273
SMAC_01251.3_t1	1216.55	-0.237832	0.720911	0.153519	0.766199	-0.0768883	0.858296	1.22583	0.000989081	0.979189	0.0134036	1.41459	0.000139945	-0.246636	0.682294	0.188763	0.748144
SMAC_01252.3_t1	419.834	-0.274681	0.570622	-0.434812	0.221483	-1.37754	9.83888e-07	0.857099	0.0043568	0.281079	0.466596	0.331551	0.404412	-0.57602	0.107095	-0.525548	0.14523
SMAC_01253.3_t1	567.653	0.273161	0.496608	-0.2797	0.377141	0.502498	0.0411497	0.105175	0.777448	-0.0633259	0.880361	0.109796	0.797625	-0.168501	0.688137	0.00462174	0.991567
SMAC_01254.3_t1	181.716	-0.213426	0.802648	0.408562	0.468195	-1.93676	7.59294e-06	-2.03904	7.24856e-06	-0.753156	0.159292	-0.105941	0.894652	1.28588	0.0151693	1.9331	4.9694e-05
SMAC_01255.3_t1	1274.76	0.674172	0.170742	0.581258	0.172838	0.989896	0.00389188	0.454757	0.288987	0.147048	0.795907	-0.307254	0.554777	-0.307709	0.584339	-0.762011	0.0730026
SMAC_01256.3_t1	848.131	0.646149	0.336728	0.406235	0.481542	2.89438	3.22708e-12	0.243094	0.703312	-0.138982	0.85367	-0.492154	0.433914	-0.382076	0.59375	-0.735248	0.204185
SMAC_01257.3_t1	2880.38	0.468007	0.288749	0.311478	0.41152	-0.0234639	0.946883	-0.68466	0.0366742	-0.518462	0.151209	-0.806385	0.0156762	0.166198	0.746731	-0.121725	0.812596
SMAC_01258.3_t1	945.017	0.423084	0.480043	0.375614	0.432756	1.8831	8.30782e-08	0.656941	0.124007	0.0607555	0.923171	0.0705667	0.921429	-0.596186	0.231175	-0.586374	0.227253
SMAC_01259.3_t1	38.4171	-0.183837	0.891745	0.229829	0.806869	-0.220772	0.769523	-1.24599	0.104576	0.226845	0.829145	-0.527137	0.604601	1.47283	0.0756078	0.718853	0.487752
SMAC_01260.3_t1	619.938	0.191697	0.694886	0.503075	0.118611	1.06681	2.98935e-05	0.28004	0.411323	-0.0491596	0.914823	-0.158133	0.720162	-0.3292	0.397818	-0.438173	0.214777
SMAC_01261.3_t1	1614.4	-0.424032	0.28985	-0.739984	0.0193071	-0.366383	0.186977	-0.451956	0.148365	-0.592456	0.0574597	-0.0824958	0.862432	-0.1405	0.766102	0.36946	0.312498
SMAC_01261.3_t2	0	NA	NA	NA	NA	NA	NA	NA	NA	NA	NA	NA	NA	NA	NA	NA	NA
SMAC_01262.3_t1	267.953	0.140657	0.866685	0.877292	0.0742815	1.52828	0.000105795	0.00842925	0.989418	-0.233202	0.713792	-0.0962363	0.901647	-0.241631	0.737414	-0.104666	0.893726
SMAC_01263.3_t1	648.169	-0.0985355	0.842321	0.542718	0.0667846	0.353226	0.166496	-0.250972	0.432365	-0.30439	0.352737	0.0374022	0.937347	-0.0534185	0.914797	0.288374	0.423021
SMAC_01264.3_t1	811.621	0.150076	0.683416	0.467391	0.0525984	0.698715	0.000341944	0.104123	0.724648	0.0181309	0.959942	0.0680288	0.851102	-0.085992	0.814021	-0.036094	0.928506
SMAC_01265.3_t1	3145.37	-0.00285969	0.995178	-0.053859	0.853943	-0.452675	0.0234372	-0.422905	0.061204	-0.0378354	0.912767	-0.0269697	0.943317	0.385069	0.134349	0.395935	0.112002
SMAC_01266.3_t1	585.521	-0.220727	0.61001	-0.117959	0.742821	0.228098	0.395564	0.418666	0.14842	0.619374	0.0272707	0.335189	0.320428	0.200708	0.621401	-0.083477	0.849859
SMAC_01267.3_t1	10032.6	0.118691	0.811759	0.0564442	0.881603	-0.152878	0.592125	-1.16091	6.17274e-06	-0.800226	0.00364202	-1.0191	0.000119583	0.360682	0.3106	0.141812	0.734325
SMAC_01267.3_t2	0	NA	NA	NA	NA	NA	NA	NA	NA	NA	NA	NA	NA	NA	NA	NA	NA
SMAC_01268.3_t1	1402.58	-0.116973	0.785316	0.405127	0.133237	0.939458	1.06493e-05	-0.669899	0.00494106	-0.568779	0.0239374	-0.423504	0.12739	0.10112	0.802133	0.246396	0.451329
SMAC_01269.3_t1	494.335	-0.0958585	0.912635	0.424143	0.424483	0.125411	0.796259	-0.96384	0.0358553	-0.611861	0.242443	-0.153065	0.833272	0.351979	0.602513	0.810775	0.118069
SMAC_01270.3_t1	213.895	-0.158302	0.860145	0.585336	0.288194	0.548008	0.233995	-0.644409	0.227483	-1.34556	0.00605828	-1.3514	0.00796991	-0.701149	0.255992	-0.706991	0.250025
SMAC_01271.3_t1	486.528	-0.545618	0.19636	-0.22454	0.566587	-0.252274	0.429074	-0.491555	0.152708	-0.932142	0.00346153	-0.1162	0.82086	-0.440587	0.282451	0.375355	0.366535
SMAC_01272.3_t1	762.127	0.796118	0.0405169	0.372224	0.330977	0.187614	0.58127	0.844102	0.00952658	0.8888	0.00730015	0.580766	0.12111	0.0446981	0.94059	-0.263336	0.566443
SMAC_01274.3_t1	2751.65	-0.620102	0.40955	-0.601543	0.317631	-0.318486	0.549744	-0.478364	0.438264	-1.32765	0.0123694	-0.900216	0.12739	-0.849291	0.176721	-0.421852	0.557483
SMAC_01276.3_t1	429.897	-0.615297	0.330611	-0.330252	0.545489	0.261718	0.570696	-0.148094	0.815377	-1.01082	0.0327927	-0.449009	0.446451	-0.862723	0.0986761	-0.300915	0.64468
SMAC_01277.3_t1	780.749	-1.23859	0.170742	-1.00426	0.20184	-1.36986	0.0328822	0.0768641	0.940642	-0.475582	0.609488	0.280358	0.799722	-0.552446	0.59375	0.203494	0.85731
SMAC_01278.3_t1	2045.92	-0.996082	0.0322539	-0.862811	0.0486213	-2.43101	3.13966e-12	-0.113444	0.844306	-0.280839	0.595705	-0.0523445	0.940083	-0.167394	0.797802	0.0610998	0.932449
SMAC_01279.3_t1	1650.66	-0.80225	0.000311818	-0.771288	0.000564438	-0.751824	9.28541e-05	-0.705639	0.000637236	-0.955966	2.03878e-06	-0.713509	0.00079582	-0.250327	0.385923	-0.00786997	0.982166
SMAC_01280.3_t1	4658.86	-0.667782	0.0439424	-1.03655	0.000292976	-1.17933	1.77658e-06	-0.138117	0.711099	-0.490413	0.113158	-0.809137	0.00388655	-0.352295	0.331074	-0.67102	0.0238305
SMAC_01281.3_t1	748.874	0.464643	0.259743	0.629737	0.0593976	0.735901	0.0074389	0.0924401	0.83265	-0.585133	0.0779106	-0.338912	0.384172	-0.677573	0.0472201	-0.431352	0.252204
SMAC_01282.3_t1	1134.19	1.00423	0.0119453	1.07726	0.00459746	1.34412	2.2548e-05	0.09469	0.855788	-0.494706	0.238116	-0.552134	0.193839	-0.589396	0.175704	-0.646824	0.120082
SMAC_01283.3_t1	561.556	0.588322	0.091249	1.00641	0.000479553	1.42186	4.99946e-09	0.120614	0.754288	0.0732928	0.868514	0.327643	0.358133	-0.047321	0.927012	0.20703	0.608499
SMAC_01284.3_t1	1557.78	0.0870784	0.872411	0.821746	0.00733295	1.37609	4.1941e-08	0.200311	0.579684	-0.171432	0.663527	0.24477	0.528245	-0.371743	0.316029	0.0444585	0.932229
SMAC_01285.3_t1	3854.33	0.464674	0.162001	0.158382	0.624528	-1.73335	1.11837e-14	-0.128779	0.707567	0.41157	0.15639	0.495692	0.0824534	0.540349	0.0630593	0.624471	0.0220521
SMAC_01286.3_t1	443.925	0.28393	0.54416	-0.0539201	0.898996	0.218258	0.478941	0.214073	0.575995	0.831478	0.00625887	0.228912	0.592008	0.617405	0.0735713	0.0148389	0.978606
SMAC_01287.3_t1	256.347	-0.452222	0.369942	0.434044	0.278998	0.387049	0.249776	-0.115498	0.815375	-0.281675	0.531021	0.203379	0.695954	-0.166177	0.772339	0.318877	0.513002
SMAC_01288.3_t1	825.778	0.270822	0.575688	0.362894	0.313388	-0.167121	0.604158	-0.295406	0.421996	-0.247224	0.53761	-0.404977	0.290991	0.0481817	0.93153	-0.109571	0.8291
SMAC_01289.3_t1	608.727	-0.589317	0.0894568	-0.481418	0.122343	0.222913	0.419783	0.141116	0.70023	-0.450715	0.149205	0.0293156	0.951235	-0.591831	0.0592469	-0.1118	0.800562
SMAC_01290.3_t1	5621.29	-0.56106	0.103467	-0.752247	0.0113541	-1.90268	1.81657e-15	-0.0273701	0.946986	0.176338	0.637797	0.294963	0.401483	0.203708	0.625702	0.322334	0.361906
SMAC_01291.3_t1	957.609	-0.655036	0.13242	-1.47623	1.75675e-05	-0.729995	0.020263	-2.32705	3.62719e-14	-2.25841	2.89333e-13	-3.22255	3.39038e-25	0.0686384	0.914797	-0.895501	0.0181993
SMAC_01292.3_t1	1070.34	0.167876	0.664083	0.289701	0.282004	2.7504	9.17373e-45	-0.87248	0.000101323	-0.800178	0.000482481	-0.563412	0.0269635	0.0723022	0.861496	0.309068	0.318762
SMAC_01293.3_t1	315.623	-0.25418	0.619786	-0.129621	0.760497	0.436741	0.143503	1.22657	2.71101e-05	0.224246	0.591858	0.0717772	0.894852	-1.00232	0.00173565	-1.15479	0.000215243
SMAC_01294.3_t1	445.564	1.29917	0.0222119	1.47409	0.00525501	1.1703	0.00961807	2.32413	2.99223e-07	1.11377	0.0325488	0.925994	0.0972362	-1.21036	0.0236493	-1.39814	0.0059912
SMAC_01295.3_t1	38057	-0.144438	0.943048	-1.52613	0.17156	0.145379	0.896748	-3.80889	4.42753e-05	-1.74671	0.112854	-4.67483	3.58824e-07	2.06217	0.0667057	-0.865944	0.525361
SMAC_01296.3_t1	941.995	-0.246136	0.606605	-0.807379	0.0134565	-0.353786	0.222121	-1.39206	5.94713e-07	-1.23508	1.51713e-05	-1.22449	2.25383e-05	0.156978	0.748526	0.167563	0.717079
SMAC_01297.3_t1	1074.32	-0.0608794	0.912342	-0.306311	0.34942	-0.0971748	0.743746	0.126413	0.739521	0.558048	0.0634014	0.38807	0.248758	0.431635	0.209104	0.261657	0.493097
SMAC_01298.3_t1	7433.01	-0.319064	0.414349	-0.149002	0.664907	-0.0163345	0.955947	-0.614151	0.0240596	0.538702	0.0631607	0.882796	0.000812063	1.15285	8.13308e-06	1.49695	1.2032e-09
SMAC_01299.3_t1	1227.75	-0.0261902	0.961246	0.346117	0.26789	0.800865	0.00104738	-0.494832	0.0848826	-0.567868	0.0519691	-0.0245621	0.959134	-0.0730362	0.879066	0.47027	0.141142
SMAC_01300.3_t1	206.941	-0.269843	0.752851	-0.416417	0.484585	-1.51575	0.000764104	-0.526087	0.357706	-0.375955	0.557359	-0.615946	0.319111	0.150132	0.859935	-0.0898585	0.919516
SMAC_01301.3_t1	837.176	0.356167	0.441936	0.664019	0.0554729	2.07948	1.67948e-14	0.322889	0.379258	-0.0361955	0.942037	-0.474418	0.21255	-0.359084	0.396326	-0.797307	0.0189698
SMAC_01302.3_t1	19338.1	-0.217063	0.760837	0.413969	0.390271	0.536913	0.168345	0.475623	0.307366	-0.173939	0.773568	-0.0856145	0.90323	-0.649562	0.193662	-0.561238	0.262936
SMAC_01303.3_t1	897.149	-0.146833	0.828873	-0.581618	0.165691	-0.46484	0.192398	-0.360058	0.412009	0.146001	0.793222	0.197995	0.723775	0.506059	0.286009	0.558053	0.211708
SMAC_01304.3_t1	197.561	0.243364	0.690375	0.534541	0.190252	0.718708	0.02945	0.38134	0.360996	0.472231	0.263078	0.425885	0.354135	0.0908912	0.88532	0.0445448	0.946352
SMAC_01305.3_t1	1242.14	-0.030129	0.959814	-0.323156	0.363785	0.13278	0.676139	0.267403	0.460025	0.538047	0.107502	0.298886	0.451657	0.270644	0.535449	0.0314822	0.952833
SMAC_01306.3_t1	1114.87	-0.175082	0.758237	-0.607119	0.0946658	-0.469836	0.127942	0.679488	0.0418254	0.0794225	0.877217	0.0137078	0.980672	-0.600066	0.114922	-0.66578	0.0661639
SMAC_01307.3_t1	539.781	-0.152965	0.804269	-0.042794	0.927554	-0.587027	0.0652734	-0.243248	0.569215	-0.300842	0.484644	-0.468522	0.259667	-0.0575936	0.92663	-0.225273	0.653508
SMAC_01308.3_t1	799.417	0.0791	0.899289	0.52771	0.145391	0.813509	0.00549355	-0.503868	0.149999	-0.577989	0.10804	-0.773195	0.0259244	-0.0741213	0.898173	-0.269327	0.55726
SMAC_01309.3_t1	1118.85	-0.052863	0.889033	0.255809	0.256703	0.0530521	0.804889	-0.582371	0.00257967	-0.597515	0.00228723	-0.0787188	0.802726	-0.0151444	0.967616	0.503652	0.017636
SMAC_01310.3_t1	399.247	-0.743439	0.334998	-0.984518	0.107597	0.277984	0.624199	0.972534	0.0894875	0.0904849	0.916645	-0.285332	0.730858	-0.882049	0.181708	-1.25787	0.0326021
SMAC_01311.3_t1	387.641	0.137255	0.858792	0.638162	0.168028	0.871379	0.0205859	0.579121	0.19791	0.437143	0.387462	0.96762	0.025856	-0.141978	0.837292	0.388499	0.485973
SMAC_01312.3_t1	10044	0.134335	0.804981	0.0962282	0.811582	-0.667802	0.0151862	-1.79236	3.22256e-11	-1.95591	4.20066e-13	-1.43653	2.38816e-07	-0.163551	0.734176	0.355835	0.357169
SMAC_01313.3_t1	447.506	-0.0663875	0.926043	-0.09307	0.845671	0.0379719	0.92578	0.10501	0.838057	-0.0571742	0.919432	0.44119	0.317494	-0.162185	0.780604	0.33618	0.488379
SMAC_01314.3_t1	2211.76	-0.502664	0.0510383	-0.479709	0.0418318	0.0243537	0.92133	-0.873662	1.3991e-05	-1.08214	4.46696e-08	-0.474456	0.0401713	-0.208477	0.497607	0.399206	0.105593
SMAC_01315.3_t1	1483.94	0.175099	0.68635	-0.0205584	0.95392	0.193984	0.457036	-1.74285	7.21005e-14	-1.57947	1.90161e-11	-1.11657	5.72296e-06	0.163382	0.694357	0.626285	0.0272482
SMAC_01316.3_t1	2054.97	-0.645073	0.113071	-0.681841	0.0554794	1.26926	8.52903e-06	0.490339	0.158585	0.235096	0.580918	0.23562	0.600853	-0.255243	0.595095	-0.254719	0.572748
SMAC_01317.3_t1	1386.74	-0.248249	0.528382	-0.214197	0.49226	-0.32331	0.191367	0.666437	0.00888037	0.55919	0.039704	0.327112	0.302976	-0.107246	0.799754	-0.339325	0.291767
SMAC_01318.3_t1	500.974	-0.229432	0.642464	-0.302492	0.404552	-0.164999	0.600301	1.88194	1.77927e-12	0.339515	0.354741	-0.374411	0.332496	-1.54242	2.78177e-08	-2.25635	1.61564e-16
SMAC_01319.3_t1	10202.8	-0.133432	0.862783	0.389118	0.427512	0.971075	0.00970568	1.10419	0.00659374	-0.161248	0.794125	-0.145803	0.826129	-1.26544	0.0029356	-1.24999	0.00265962
SMAC_01320.3_t1	6057.05	0.203562	0.804269	0.687491	0.177635	0.847059	0.0439638	0.446464	0.403325	-0.200164	0.763205	-0.422352	0.481962	-0.646627	0.256484	-0.868816	0.0894249
SMAC_01321.3_t1	5890.4	0.256273	0.728541	0.639317	0.187956	0.43111	0.306348	0.0583721	0.928814	-0.53921	0.293149	-0.70357	0.156873	-0.597582	0.273447	-0.761942	0.124314
SMAC_01322.3_t1	17.4572	0.927407	0.444825	0.910256	0.344497	1.88749	0.00930343	-0.649213	0.561126	0.642926	0.545044	-0.507166	0.725688	1.29214	0.242523	0.142047	0.939097
SMAC_01323.3_t1	627.283	0.132976	0.761305	0.435082	0.119899	0.149472	0.563033	0.328046	0.239343	-0.030553	0.938371	0.0286491	0.947667	-0.358599	0.255808	-0.299397	0.360953
SMAC_01324.3_t1	437.855	-0.742338	0.0959239	-1.48613	5.36908e-05	-1.10019	0.00063797	0.712177	0.0497277	0.562654	0.157404	0.0351812	0.954231	-0.149524	0.795578	-0.676996	0.091877
SMAC_01325.3_t1	881.539	1.60877	0.00408954	1.29881	0.0206395	0.000304924	0.999641	1.05216	0.0479498	2.10574	1.53042e-05	1.87895	0.000151594	1.05358	0.0718956	0.826787	0.171406
SMAC_01326.3_t1	474.8	1.68193	3.38151e-06	1.12939	0.00401167	0.354771	0.330775	-0.918985	0.0148934	-0.720481	0.0775971	0.113806	0.852278	0.198504	0.74575	1.03279	0.00896736
SMAC_01327.3_t1	1430.98	0.0953088	0.821274	0.0292864	0.927062	0.73922	0.000332992	-0.0237706	0.945378	0.0396256	0.913854	0.0860798	0.816229	0.0633962	0.875954	0.10985	0.758333
SMAC_01329.3_t1	248.074	-0.46688	0.595544	-0.256588	0.725183	2.22832	2.66612e-06	3.17626	3.6546e-11	1.74528	0.0008691	0.575149	0.417696	-1.43098	0.0109487	-2.60112	2.69163e-07
SMAC_01330.3_t1	1301.29	0.00863188	0.990598	0.134252	0.799445	1.30593	0.000174637	0.441484	0.322101	0.292285	0.566438	-0.213435	0.715928	-0.149199	0.818341	-0.654919	0.151262
SMAC_01331.3_t1	465.282	-0.219615	0.664581	-0.190214	0.622864	0.651374	0.0189078	0.631421	0.0418655	0.193945	0.638836	0.63677	0.0549574	-0.437476	0.247415	0.00534934	0.99149
SMAC_01332.3_t1	1333.17	-0.355826	0.244071	-0.124687	0.666078	-0.453773	0.0291775	1.08818	1.01697e-07	0.0159967	0.964867	-0.203944	0.501323	-1.07218	3.68491e-07	-1.29212	4.22567e-10
SMAC_01333.3_t1	231.171	-0.937944	0.0970856	-1.88873	5.79528e-05	-2.63978	1.74453e-10	0.0691457	0.918672	0.0858134	0.904198	0.0353089	0.963677	0.0166677	0.983493	-0.0338368	0.966708
SMAC_01334.3_t1	40.6745	-0.952522	0.353754	-1.40159	0.0899934	-2.10397	0.00238993	0.121974	0.907669	0.254954	0.808688	0.311709	0.778369	0.13298	0.917786	0.189735	0.87286
SMAC_01335.3_t1	151.009	-1.04138	0.0163347	-0.923941	0.0269504	-2.23694	2.54683e-10	0.44114	0.287742	-0.263946	0.591109	-0.284914	0.588295	-0.705086	0.100576	-0.726053	0.089868
SMAC_01336.3_t1	422.933	0.2237	0.795456	0.587719	0.288222	1.41447	0.00100744	0.526038	0.34047	-0.0544192	0.942675	-0.52226	0.401708	-0.580458	0.359436	-1.0483	0.0486567
SMAC_01337.3_t1	519.104	-0.432586	0.323934	-0.257922	0.493912	-0.424426	0.152648	-0.164691	0.68909	-0.221908	0.591109	0.120335	0.808054	-0.0572163	0.920965	0.285027	0.507051
SMAC_01338.3_t1	270.813	0.00298849	0.996537	0.141312	0.768769	0.809718	0.0126678	1.01891	0.00326084	0.116197	0.831616	-0.158185	0.783492	-0.902715	0.0189734	-1.1771	0.00126205
SMAC_01339.3_t1	77.4565	-1.57183	0.0797805	-2.3705	0.00252867	-3.09134	4.06026e-06	-1.19577	0.119846	-0.764661	0.387038	-1.31544	0.110913	0.431104	0.706573	-0.119674	0.928506
SMAC_01340.3_t1	1496.88	-0.191101	0.736436	-0.778883	0.0305362	-2.27839	2.36301e-15	-1.60138	1.23499e-07	-2.26846	1.95785e-14	-2.72571	2.99458e-20	-0.667077	0.079733	-1.12433	0.000777992
SMAC_01341.3_t1	379.581	-0.107404	0.838181	-0.154379	0.678802	-0.229396	0.425659	0.588745	0.0431487	0.245197	0.497758	0.0419846	0.934832	-0.343548	0.358106	-0.54676	0.0952648
SMAC_01342.3_t1	1766.27	0.489795	0.469389	0.59868	0.250731	-3.13506	5.4326e-15	0.106467	0.874284	-0.563955	0.300986	-0.962751	0.0528099	-0.670422	0.238194	-1.06922	0.0292779
SMAC_01343.3_t1	171.669	0.521013	0.29241	0.479635	0.241619	1.35332	1.44813e-05	-0.161629	0.743084	-0.104514	0.85343	0.223262	0.675591	0.0571145	0.930684	0.38489	0.436585
SMAC_01344.3_t1	1222.24	-0.295598	0.363959	-0.330695	0.202406	-0.948232	3.21951e-06	-1.9086	7.49895e-21	-2.35677	5.29969e-31	-2.32787	3.50739e-29	-0.448167	0.104159	-0.419265	0.135155
SMAC_01345.3_t1	1396.09	-0.159658	0.729708	-1.31984	6.98631e-07	-2.46524	2.04704e-25	-0.705761	0.00840881	0.0729396	0.863422	-0.483046	0.114768	0.778701	0.00602504	0.222715	0.555199
SMAC_01346.3_t1	1664.22	0.0960126	0.867246	0.50993	0.137605	-0.0396617	0.90977	-0.0232982	0.957139	-0.0318524	0.948425	0.148485	0.754551	-0.00855414	0.987159	0.171783	0.710654
SMAC_01347.3_t1	1219.5	-0.349718	0.485072	-0.767896	0.0357859	-0.286621	0.386761	-0.102716	0.830224	0.195814	0.669393	-0.113216	0.834036	0.29853	0.535336	-0.0104999	0.985127
SMAC_01348.3_t1	1570.86	0.195672	0.670317	0.449758	0.147592	0.671249	0.00766314	-0.0576981	0.88962	-0.294008	0.390193	-0.0951897	0.832801	-0.23631	0.560511	-0.0374916	0.941362
SMAC_01349.3_t1	1303.7	0.306388	0.655312	1.09737	0.0152621	0.972447	0.0108073	0.218325	0.694358	0.198594	0.742865	0.0740102	0.921115	-0.0197314	0.979494	-0.144315	0.831364
SMAC_01350.3_t1	1014.12	-0.260691	0.772037	-0.994932	0.0807099	0.146259	0.792732	-0.0661077	0.931906	0.0651326	0.934771	0.330231	0.65401	0.13124	0.883681	0.396338	0.581951
SMAC_01351.3_t1	32391.8	0.0959023	0.847976	0.0126703	0.971717	0.47778	0.0585949	-0.651679	0.0168219	-0.591001	0.039828	-0.572106	0.0520751	0.0606785	0.900193	0.0795734	0.85731
SMAC_01352.3_t1	218.388	-1.15497	0.153839	-1.13276	0.10527	-2.97248	1.56066e-07	-1.56463	0.0128811	-1.3995	0.034633	-0.437261	0.621938	0.16513	0.881077	1.12737	0.121329
SMAC_01353.3_t1	417.812	-0.568335	0.341079	-1.09776	0.0181535	-0.206136	0.641064	-0.0278544	0.962687	-0.172378	0.783733	0.261602	0.668394	-0.144523	0.83974	0.289456	0.6333
SMAC_01354.3_t1	497.572	0.776372	0.00648202	0.004624	0.989214	1.25008	3.20608e-08	-0.528869	0.0530061	0.854803	0.0006432	0.178486	0.636137	1.38367	1.45884e-08	0.707355	0.0122401
SMAC_01355.3_t1	156.352	0.524412	0.334998	0.611331	0.160378	-1.79963	2.72438e-06	0.552513	0.187606	1.87085	6.48241e-08	0.327677	0.543132	1.31833	0.000481778	-0.224836	0.70524
SMAC_01356.3_t1	1727.24	0.587515	0.162832	0.189083	0.646938	-0.430398	0.16605	-0.0868684	0.854511	0.184975	0.6831	-0.0683178	0.903332	0.271844	0.570188	0.0185506	0.974923
SMAC_01357.3_t1	284.567	-0.146074	0.825258	0.73571	0.0616721	-0.797891	0.0164033	-0.350988	0.408069	-1.38063	7.75582e-05	-0.888242	0.0225834	-1.02964	0.00827918	-0.537254	0.235224
SMAC_01358.3_t1	322.126	-1.23568	0.0835215	-1.59847	0.0104639	-4.06414	1.27254e-14	-1.27082	0.0303766	-0.455002	0.540354	-0.0713575	0.943317	0.815815	0.262476	1.19946	0.0601517
SMAC_01359.3_t1	2755.67	0.85241	0.0239529	1.28766	0.000110167	1.36491	2.55019e-06	-0.761329	0.0220294	-0.762829	0.0264933	-0.34659	0.413948	-0.00150005	0.998277	0.414739	0.319033
SMAC_01359.3_t2	0	NA	NA	NA	NA	NA	NA	NA	NA	NA	NA	NA	NA	NA	NA	NA	NA
SMAC_01360.3_t1	1100.93	-0.303654	0.613767	-0.383338	0.390777	-0.0879572	0.834051	0.0142275	0.978823	0.165524	0.764581	0.320728	0.530302	0.151296	0.809433	0.306501	0.559255
SMAC_01361.3_t1	941.528	-0.16578	0.714735	-0.226572	0.477721	-0.699155	0.00371557	-0.0896214	0.810425	0.109427	0.779547	0.441374	0.146515	0.199048	0.618803	0.530995	0.072915
SMAC_01362.3_t1	696.775	-1.149	0.00691125	-0.674113	0.114305	0.631541	0.0743634	1.7227	7.61841e-07	0.10778	0.856755	0.0628615	0.926015	-1.61492	8.91789e-06	-1.65984	4.09815e-06
SMAC_01363.3_t1	5373.41	-0.125907	0.881262	-0.960324	0.0506884	-0.724354	0.0830588	-0.935058	0.0416104	-0.781131	0.11594	-1.00991	0.0338122	0.153926	0.838174	-0.0748565	0.925329
SMAC_01364.3_t1	8890.28	0.11108	0.748253	-1.43688	7.26557e-15	-2.21055	6.18459e-38	-1.03274	1.48658e-08	-1.29437	6.32956e-13	-1.98146	9.77835e-30	-0.261629	0.311627	-0.948725	4.9037e-07
SMAC_01365.3_t1	21.474	0.382026	0.742978	0.906185	0.221217	1.0589	0.0756206	0.527747	0.508603	0.411708	0.643083	1.4181	0.042319	-0.116039	0.922423	0.890357	0.266207
SMAC_01367.3_t1	5900.03	0.0424205	0.94075	0.166165	0.639451	0.575964	0.0253376	0.369414	0.235493	-0.511117	0.0979038	-0.564681	0.0665664	-0.880531	0.00224349	-0.934095	0.000777992
SMAC_01368.3_t1	1961.47	0.650667	0.099563	-0.187533	0.64055	-0.130923	0.694719	-0.0554457	0.907325	0.496703	0.166811	0.367573	0.355366	0.552149	0.142323	0.423019	0.282337
SMAC_01369.3_t1	170.162	0.224377	0.734221	0.738172	0.0791324	1.66532	4.22879e-07	-0.0644179	0.911344	-0.317916	0.520267	0.261255	0.638038	-0.253498	0.677423	0.325673	0.552892
SMAC_01370.3_t1	1400.52	0.23149	0.623333	0.727939	0.0228483	1.63435	1.74453e-10	0.0903223	0.831232	-0.355043	0.315874	-0.282864	0.470609	-0.445365	0.224405	-0.373186	0.319033
SMAC_01371.3_t1	254.38	-0.457965	0.605652	-0.892591	0.15995	-0.936093	0.0740882	1.75863	0.000855728	1.0877	0.0671185	1.24951	0.0332578	-0.670925	0.348992	-0.509115	0.494858
SMAC_01372.3_t1	135.557	-0.0403041	0.961431	-0.160066	0.782166	1.02468	0.00646346	0.865953	0.0418254	0.455201	0.372073	0.509049	0.337267	-0.410752	0.48027	-0.356904	0.542048
SMAC_01373.3_t1	476.698	-0.166374	0.77994	-0.261676	0.522713	-0.0516972	0.891026	-0.432149	0.251702	-0.411113	0.306563	0.201287	0.682954	0.0210358	0.973888	0.633436	0.100344
SMAC_01374.3_t1	1383.68	0.486777	0.143024	0.555821	0.0519746	1.07439	2.78314e-06	-0.44364	0.109155	-0.607884	0.0256248	-0.172241	0.645986	-0.164244	0.69004	0.271399	0.436585
SMAC_01375.3_t1	58.8697	-1.21241	0.126619	-0.780267	0.274187	-4.59697	8.08439e-12	-2.65402	1.18815e-05	-3.04147	6.22563e-07	-1.5722	0.0191081	-0.387455	0.726841	1.08182	0.175825
SMAC_01376.3_t1	133.454	-0.684519	0.232037	-0.321389	0.53325	-7.3464	6.74379e-19	-2.04672	3.6055e-07	-2.45391	1.00131e-09	-3.8533	2.84705e-16	-0.407189	0.538806	-1.80658	0.000818958
SMAC_01377.3_t1	5.33369	-0.709704	0.802495	0.407638	0.833296	-2.02872	0.245354	1.09108	0.52253	0.876548	0.643253	1.13825	0.560155	-0.214529	0.930283	0.0471687	0.98381
SMAC_01378.3_t1	117.242	-0.711179	0.293595	-0.4895	0.396662	-3.1586	2.65446e-11	-1.25958	0.0102021	-0.459492	0.447082	-0.380525	0.575389	0.800087	0.185512	0.879054	0.131331
SMAC_01379.3_t1	269.51	0.318512	0.519051	0.41104	0.271316	-0.761383	0.0115877	-1.63559	1.23042e-07	-1.32961	2.55597e-05	-1.36977	3.06604e-05	0.305985	0.542488	0.265828	0.599016
SMAC_01380.3_t1	232.332	0.439079	0.555613	-0.636165	0.257327	-1.61812	0.00028145	-0.0495031	0.945855	0.203526	0.776084	0.0770761	0.927905	0.253029	0.745521	0.126579	0.878091
SMAC_01381.3_t1	84.1739	-0.0216637	0.979005	0.323801	0.549952	-2.05023	3.27534e-06	0.0286914	0.96355	-0.411107	0.464344	0.0761844	0.9244	-0.439798	0.492583	0.047493	0.953144
SMAC_01382.3_t1	52.1322	-0.783281	0.317998	0.354215	0.592305	-1.1943	0.0220619	1.01987	0.0582056	-0.240705	0.757376	0.0991236	0.918601	-1.26057	0.0300273	-0.920744	0.145191
SMAC_01383.3_t1	405.282	1.59075	0.000516312	0.0892383	0.884062	-7.14258	1.40633e-17	-1.06348	0.0189838	1.413	0.00105368	0.978142	0.0396856	2.47648	2.15716e-09	2.04162	1.52932e-06
SMAC_01384.3_t1	44.1605	-0.39983	0.744266	-0.279375	0.766503	-3.69202	1.79966e-05	-0.0885635	0.932364	1.62832	0.0193235	0.52297	0.588513	1.71689	0.0204408	0.611534	0.528877
SMAC_01385.3_t1	33.2127	-0.689736	0.386197	-0.340405	0.613533	-1.45982	0.00673086	0.312634	0.628015	0.975242	0.0631607	0.888016	0.124899	0.662608	0.292176	0.575382	0.388027
SMAC_01386.3_t1	2679	-0.234973	0.80535	0.172929	0.807956	0.226603	0.683844	0.0609425	0.938879	-0.709685	0.252731	-0.503966	0.470366	-0.770628	0.242523	-0.564909	0.415474
SMAC_01387.3_t1	345.783	-0.315787	0.519051	-0.355273	0.346042	0.371526	0.221878	0.767152	0.014412	1.61146	1.44377e-08	1.27023	2.01246e-05	0.844313	0.0102729	0.503082	0.171866
SMAC_01388.3_t1	268.447	1.83201	2.26472e-05	0.534561	0.293316	-2.81626	3.96294e-10	0.181838	0.764751	2.34366	2.51438e-09	1.20618	0.00679698	2.16182	9.92102e-08	1.02434	0.0301743
SMAC_01389.3_t1	61.5074	0.339448	0.68268	-0.454228	0.461651	-2.00367	8.32688e-05	-0.689932	0.222246	1.01108	0.0502763	0.756501	0.195898	1.70101	0.000918917	1.44643	0.00684684
SMAC_01390.3_t1	45.6019	5.37552	2.53964e-22	-1.65421	0.168507	0.309209	0.692322	-0.574324	0.579792	0.901194	0.267513	-0.289226	0.84223	1.47552	0.113372	0.285098	0.859556
SMAC_01391.3_t1	462.92	-0.800964	0.22641	-1.20676	0.0257183	0.499766	0.297807	-2.27689	7.84124e-07	-1.23086	0.0155129	-0.242043	0.749674	1.04603	0.0663803	2.03485	2.34994e-05
SMAC_01392.3_t1	633.473	-0.340646	0.547764	-0.265699	0.555636	0.649119	0.0568159	0.177437	0.719189	0.093058	0.872367	0.311216	0.531776	-0.0843788	0.896949	0.133779	0.819759
SMAC_01393.3_t1	540.464	-0.207303	0.66153	-0.114308	0.764879	-0.600366	0.0235956	0.477996	0.11284	0.995643	0.000252836	0.754715	0.009925	0.517647	0.118074	0.276719	0.470672
SMAC_01394.3_t1	3849.8	0.265277	0.604762	0.52885	0.144471	1.51169	1.058e-07	-0.949647	0.00263612	-1.12043	0.000347715	-0.87174	0.0085952	-0.170781	0.742065	0.0779064	0.887552
SMAC_01396.3_t1	732.869	-0.52797	0.434099	-0.593055	0.26152	1.22349	0.00319671	-1.38923	0.00198635	-0.59235	0.276504	-0.107976	0.888556	0.79688	0.149974	1.28125	0.00748344
SMAC_01397.3_t1	35549.7	-0.483796	0.553472	-2.19455	4.11637e-05	-0.754007	0.133664	-5.12972	1.48718e-28	-3.14208	6.0788e-11	-6.45334	6.68427e-45	1.98764	0.000159849	-1.32361	0.0188
SMAC_01398.3_t1	52.5581	-0.42573	0.626742	-0.805392	0.202143	1.17611	0.0132916	-0.208333	0.779498	-0.888084	0.149276	-2.11351	0.00113765	-0.679751	0.351687	-1.90518	0.00536132
SMAC_01399.3_t1	9800.39	0.566902	0.299758	0.648537	0.142227	0.0372705	0.932238	0.3842	0.409327	0.960347	0.0184103	0.818049	0.0566778	0.576147	0.241419	0.433849	0.39812
SMAC_01400.3_t1	318.564	-0.50206	0.353754	-0.79307	0.0627578	0.652599	0.0629388	0.305844	0.507765	0.267323	0.593959	0.186951	0.749888	-0.0385207	0.95646	-0.118892	0.847739
SMAC_01401.3_t1	2523.54	-1.24366	3.26129e-05	-0.564786	0.0868371	0.995258	0.000173215	-0.0282942	0.948992	-0.285308	0.441198	0.362652	0.325532	-0.257014	0.552381	0.390946	0.291608
SMAC_01402.3_t1	546.426	-0.804401	0.00921704	-0.448197	0.146904	0.151395	0.585246	2.63625	4.52574e-31	0.938372	0.000230109	0.223609	0.548131	-1.69788	5.27885e-13	-2.41264	9.19403e-25
SMAC_01403.3_t1	196.301	-0.233194	0.650726	0.350338	0.330618	1.03397	0.000135637	0.218023	0.573187	-0.261019	0.512279	0.0551566	0.921993	-0.479042	0.214987	-0.162866	0.737809
SMAC_01404.3_t1	31107.3	0.339563	0.652236	0.422014	0.443404	0.665127	0.127202	-0.0816374	0.906512	-1.08923	0.0233348	-1.44941	0.00150231	-1.00759	0.05168	-1.36777	0.00354262
SMAC_01405.3_t1	2171.34	0.41898	0.255155	0.484468	0.107803	0.489132	0.0517588	-0.453193	0.117226	-0.336614	0.298259	-0.25728	0.474528	0.116579	0.793453	0.195913	0.612953
SMAC_01406.3_t1	122.474	0.479572	0.560149	-0.961743	0.124557	-0.695888	0.184297	2.3989	5.92702e-07	0.734436	0.232581	0.0393914	0.966394	-1.66446	0.00174079	-2.3595	3.71521e-06
SMAC_01407.3_t1	488.181	-0.0736244	0.947096	-0.920056	0.132473	-1.77967	0.000314693	2.13865	2.16926e-05	1.17072	0.0400072	0.464717	0.523607	-0.967927	0.125496	-1.67393	0.00205873
SMAC_01408.3_t1	459.472	0.642244	0.162764	0.529763	0.186984	0.515821	0.123954	-0.232147	0.611763	-0.0316682	0.956606	0.150598	0.791043	0.200478	0.72666	0.382744	0.421259
SMAC_01409.3_t1	418.208	2.0238	0.0160307	1.5329	0.0616721	-1.14435	0.104397	-2.20995	0.0027023	-2.5528	0.000512753	-2.65751	0.00040681	-0.342848	0.785888	-0.447563	0.703505
SMAC_01410.3_t1	869.57	1.42405	0.0589812	0.582811	0.434895	2.13268	0.000130024	-1.28526	0.0470435	-1.08405	0.120965	-0.984276	0.181236	0.201208	0.852081	0.300986	0.756363
SMAC_01411.3_t1	341.128	0.0971983	0.86809	0.493141	0.158714	0.986165	0.000356101	-0.739722	0.0199909	-0.820234	0.0108751	-0.781623	0.0218188	-0.0805122	0.886593	-0.0419013	0.944996
SMAC_01412.3_t1	954.563	0.251281	0.582444	0.0257856	0.949411	1.58988	3.93872e-10	-2.16697	3.76095e-16	-1.81647	1.27088e-11	-1.75869	1.74287e-10	0.350493	0.392596	0.408276	0.295936
SMAC_01413.3_t1	2294.85	-0.33907	0.629387	-0.361105	0.493027	-1.5154	0.000108843	0.940066	0.0349762	1.39585	0.00107005	1.17968	0.0080195	0.455789	0.449319	0.239618	0.71446
SMAC_01414.3_t1	106.109	2.22784	0.00010452	0.264978	0.736895	0.257556	0.67907	0.760314	0.238893	3.74655	6.34579e-14	1.1852	0.0653265	2.98623	5.54852e-09	0.424888	0.606053
SMAC_01415.3_t1	56.7524	0.221887	0.786119	-0.129176	0.839187	-0.828649	0.0734954	1.84403	2.85677e-06	1.16512	0.00756188	1.12041	0.0166101	-0.678904	0.172123	-0.723614	0.148823
SMAC_01416.3_t1	149.873	-1.03975	0.168162	-1.16634	0.0718947	-0.919601	0.0869355	2.57513	3.22559e-07	0.811174	0.202924	0.687261	0.323314	-1.76396	0.00159365	-1.88787	0.000543544
SMAC_01417.3_t1	17.0024	1.48117	0.0922725	0.166384	0.874074	1.24536	0.0584667	-0.237327	0.83098	1.34414	0.0774304	-0.363328	0.789034	1.58146	0.059723	-0.126001	0.938964
SMAC_01419.3_t1	625.647	-0.0402824	0.93674	0.0228355	0.947126	-0.717302	0.00151003	0.465007	0.0703434	0.107662	0.765967	0.313364	0.307396	-0.357345	0.246096	-0.151644	0.680096
SMAC_01420.3_t1	514.006	0.363875	0.468712	0.570901	0.130778	0.916845	0.00258494	0.0791404	0.87392	-0.473534	0.231742	-0.357891	0.420155	-0.552674	0.181716	-0.437032	0.313896
SMAC_01421.3_t1	398.536	0.617023	0.1663	0.0434701	0.927554	0.585944	0.0669437	-0.0401981	0.938223	1.14175	0.000565671	0.846215	0.0189695	1.18195	0.000636618	0.886413	0.0149232
SMAC_01422.3_t1	367.657	0.255103	0.664635	0.925858	0.0158695	0.262994	0.464774	-0.306414	0.479008	-0.0258361	0.964565	0.348069	0.461501	0.280578	0.602513	0.654483	0.114333
SMAC_01423.3_t1	1556.43	0.219527	0.577893	0.208037	0.495334	-0.225866	0.368144	0.168707	0.601231	0.219971	0.492762	0.127249	0.743758	0.0512642	0.911672	-0.041458	0.928267
SMAC_01424.3_t1	32.4192	0.743215	0.520908	0.0786376	0.941735	0.00664813	0.993824	1.12513	0.167017	1.14626	0.181126	0.220179	0.865388	0.0211261	0.987094	-0.904953	0.371533
SMAC_01425.3_t1	349.138	-0.170041	0.825258	-1.27332	0.00515951	-0.906658	0.0194885	-0.325583	0.529153	0.477174	0.34678	-0.721186	0.138745	0.802756	0.0984362	-0.395603	0.497502
SMAC_01426.3_t1	810.934	0.00988486	0.985438	-0.438632	0.168653	-0.244469	0.382421	-0.871908	0.00146853	-0.720761	0.0126679	-1.08809	7.54255e-05	0.151148	0.740471	-0.216179	0.596157
SMAC_01427.3_t1	800.111	-0.019068	0.967795	0.284325	0.324991	0.0723981	0.787891	-0.161569	0.612234	-0.355013	0.219354	-0.172218	0.629069	-0.193443	0.608025	-0.0106488	0.980939
SMAC_01428.3_t1	2922.56	-0.466519	0.335956	-0.595338	0.1224	-1.89397	4.08587e-10	-1.53288	1.69778e-06	-1.69634	1.03624e-07	-1.13175	0.000868623	-0.163459	0.772339	0.401135	0.370607
SMAC_01429.3_t1	1166.95	-0.691973	0.058774	-1.1475	0.000223021	-0.400942	0.164042	-0.838658	0.00483343	-0.855331	0.00485374	-0.721258	0.024418	-0.0166728	0.977231	0.1174	0.80855
SMAC_01431.3_t1	27.1795	1.14122	0.40955	2.17814	0.0274284	2.57098	0.00125062	2.4803	0.00421879	1.95359	0.039133	4.58236	6.44268e-09	-0.526704	0.669311	2.10206	0.00726055
SMAC_01432.3_t1	116.592	-0.0197718	0.982883	-0.776197	0.186392	2.63933	6.14302e-10	-1.21285	0.02137	-1.94936	0.000178425	-1.98248	0.00058648	-0.736508	0.31184	-0.769628	0.318249
SMAC_01433.3_t1	1362.69	0.0426902	0.951585	-0.667394	0.0729843	1.27216	1.80617e-05	-0.681122	0.0492812	-0.448723	0.254542	-0.45761	0.260773	0.2324	0.653884	0.223512	0.646969
SMAC_01434.3_t1	128.014	0.721091	0.327986	0.697514	0.245799	1.61375	0.000497845	1.88463	0.000108188	0.964852	0.0903969	0.85534	0.163092	-0.919774	0.125883	-1.02929	0.0774863
SMAC_01435.3_t1	332.316	0.326292	0.526181	0.323963	0.421	1.42824	1.28484e-06	-0.507952	0.170931	0.423007	0.289748	-0.687689	0.0782179	0.930959	0.0103916	-0.179737	0.740971
SMAC_01436.3_t1	732.621	-0.305756	0.419797	-0.18685	0.557005	0.843727	0.000246597	-0.345368	0.230194	-0.567232	0.0390601	-0.420379	0.168663	-0.221865	0.562239	-0.0750118	0.863218
SMAC_01437.3_t1	899.064	0.1222	0.80535	0.546246	0.0713047	0.570121	0.0232877	0.239706	0.466195	-0.253228	0.461798	-0.0892373	0.842193	-0.492934	0.128778	-0.328943	0.354303
SMAC_01438.3_t1	77.3277	-0.526088	0.468842	0.151199	0.812527	-1.12356	0.0142902	0.786103	0.108015	0.471328	0.412163	1.2232	0.0104681	-0.314774	0.657259	0.437099	0.48562
SMAC_01439.3_t1	3024.38	0.490946	0.247112	-0.373827	0.304137	-3.52899	3.8579e-38	-0.865021	0.00505467	-0.0763866	0.877217	-0.239024	0.582104	0.788634	0.0205792	0.625996	0.0742524
SMAC_01440.3_t1	692.058	3.96071	0.0202015	1.78978	0.301823	-0.165063	0.923584	-1.34241	0.45418	-0.111473	0.963856	-1.10322	0.598508	1.23094	0.579106	0.239198	0.929922
SMAC_01441.3_t1	62.8106	0.235956	0.765956	-0.48381	0.387061	-0.904674	0.0421084	0.667952	0.161615	0.830074	0.0823002	0.799932	0.118126	0.162122	0.82316	0.131981	0.85731
SMAC_01442.3_t1	211.574	-0.00264778	0.996628	-0.622129	0.148396	-1.50059	1.61982e-05	0.242205	0.613267	0.348854	0.454858	0.214768	0.702328	0.106649	0.869629	-0.027437	0.967772
SMAC_01443.3_t1	693.379	-0.0725712	0.912454	-0.565735	0.13536	-0.293471	0.380028	0.532904	0.13824	0.124764	0.806134	-0.0370133	0.949808	-0.40814	0.354756	-0.569917	0.147618
SMAC_01444.3_t1	792.881	-0.412754	0.378191	-1.41962	1.87544e-05	-5.52378	7.20319e-52	-0.02857	0.953296	1.27335	3.59341e-05	-0.123858	0.811893	1.30192	3.90939e-05	-0.0952882	0.859556
SMAC_01445.3_t1	337.701	1.47625	0.130047	1.32131	0.122885	-1.21874	0.0931419	-0.851226	0.337736	-1.25135	0.151345	-1.48889	0.0866912	-0.40012	0.748154	-0.637663	0.55747
SMAC_01446.3_t1	50.3318	-0.435669	0.611853	-1.85497	0.00235812	-5.99472	1.13126e-09	-0.582284	0.348149	-1.08962	0.0634784	-0.820543	0.215905	-0.507337	0.525126	-0.238259	0.791056
SMAC_01447.3_t1	0.600095	-0.70617	NA	-0.52787	NA	-2.61978	0.636947	-1.32652	0.865141	-0.0135321	0.9988	-1.90121	NA	1.31299	NA	-0.574693	0.95252
SMAC_01448.3_t1	0.564003	-0.823224	NA	-1.16043	NA	-2.70905	0.571628	-2.81789	0.637969	-0.316766	0.965003	-0.616887	NA	2.50112	NA	2.201	0.769786
SMAC_01449.3_t1	465.672	-1.49766	0.305282	-2.23199	0.0541886	-9.4514	5.60909e-14	-2.88405	0.00539242	-1.35423	0.275749	0.0872622	0.961708	1.52982	0.245176	2.97131	0.00604838
SMAC_01450.3_t1	878.854	-0.0514505	0.961246	0.690115	0.265553	-2.57922	8.98235e-08	0.773738	0.190497	-1.12687	0.0520894	-0.59372	0.388533	-1.90061	0.000476783	-1.36746	0.0164599
SMAC_01452.3_t1	4.91916	0.1654	0.952753	0.344833	0.847375	-0.305332	0.842068	0.0493627	0.978966	1.56072	0.28598	0.369107	0.871341	1.51136	0.370553	0.319744	0.896446
SMAC_01453.3_t1	3165.77	-0.0561655	0.896486	-0.00296299	0.991762	-0.237167	0.276389	0.96851	2.79129e-06	0.254735	0.347156	0.573397	0.0131503	-0.713775	0.00177255	-0.395113	0.124038
SMAC_01454.3_t1	359.204	-0.953667	0.176931	-1.62896	0.00513693	-0.45405	0.397052	0.178364	0.814455	-0.0698647	0.93338	0.0745241	0.937162	-0.248229	0.77657	-0.10384	0.911662
SMAC_01455.3_t1	1068.01	-0.190221	0.550176	0.136367	0.595414	-0.225583	0.261133	-0.00932317	0.974649	-0.250221	0.310896	-0.00291681	0.992798	-0.240898	0.38209	0.00640636	0.985253
SMAC_01456.3_t1	543.309	-0.15546	0.777178	0.0619412	0.884862	-0.50182	0.0858783	-0.155946	0.707044	-0.196138	0.642975	0.296509	0.471622	-0.0401927	0.943088	0.452455	0.232389
SMAC_01457.3_t1	1330.53	-0.197629	0.637544	-0.136902	0.684298	0.16467	0.535687	-1.06319	1.35168e-05	-0.937312	0.000186862	-0.984316	9.65867e-05	0.125875	0.768619	0.0788711	0.855219
SMAC_01458.3_t1	4743.81	0.0915171	0.860758	0.183381	0.59709	2.04936	1.52193e-17	0.130682	0.728102	-0.84817	0.00212357	-0.814651	0.0037491	-0.978852	0.000483821	-0.945333	0.000641369
SMAC_01459.3_t1	17121.1	0.406145	0.525278	0.125169	0.824848	1.62283	1.38435e-05	-2.10275	4.4746e-08	-1.81483	4.27188e-06	-2.08348	7.62941e-08	0.287919	0.657259	0.0192752	0.979488
SMAC_01459.3_t2	0	NA	NA	NA	NA	NA	NA	NA	NA	NA	NA	NA	NA	NA	NA	NA	NA
SMAC_01460.3_t1	166.811	-0.101022	0.902654	-0.0703935	0.905683	0.810927	0.0369107	0.0571733	0.929167	-0.411935	0.438435	-0.511983	0.351721	-0.469108	0.422045	-0.569156	0.302888
SMAC_01461.3_t1	490.641	0.0578108	0.94075	0.450134	0.303359	-0.7101	0.0439978	-0.394946	0.370089	0.621751	0.141345	0.181708	0.756963	1.0167	0.0118055	0.576653	0.206145
SMAC_01462.3_t1	673.32	0.470335	0.318958	-0.245677	0.551567	-2.9595	5.99919e-22	-0.625742	0.0781462	0.798615	0.0221124	-0.428301	0.30826	1.42436	1.2638e-05	0.197441	0.701204
SMAC_01463.3_t1	1090.6	-0.488316	0.168464	-0.452244	0.139658	0.81897	0.000740012	0.268237	0.3992	0.592061	0.0381547	0.236096	0.518628	0.323824	0.365083	-0.0321404	0.947236
SMAC_01464.3_t1	1725.98	-0.807153	0.120292	-0.567752	0.224315	-0.746511	0.0504139	-0.987864	0.0166079	-0.967731	0.0235789	-0.635577	0.186894	0.0201325	0.979091	0.352287	0.535116
SMAC_01465.3_t1	300.674	-0.463508	0.417395	-0.200777	0.690753	3.23164	5.45353e-25	2.36302	4.68313e-13	1.37852	9.29438e-05	0.116857	0.855202	-0.984503	0.0100007	-2.24616	1.15096e-10
SMAC_01466.3_t1	4169.16	-1.76132	3.94563e-06	-1.2133	0.00313567	-2.34592	4.24435e-12	0.753094	0.0611821	0.484881	0.292366	0.734538	0.0878812	-0.268212	0.65234	-0.0185559	0.978606
SMAC_01467.3_t1	2010.46	-0.285519	0.481737	-0.280053	0.379559	-0.190491	0.487945	0.74231	0.00514347	0.558025	0.0537751	0.390274	0.225996	-0.184284	0.657504	-0.352036	0.297723
SMAC_01468.3_t1	909.336	-0.931447	0.0161961	-1.31593	0.00017891	-5.0194	7.47288e-50	-0.0425244	0.934272	0.558069	0.144122	0.460325	0.263221	0.600593	0.13555	0.502849	0.21869
SMAC_01469.3_t1	669.143	-0.354735	0.599014	0.366169	0.474964	-2.75866	4.9846e-13	-0.990785	0.0221175	-0.240562	0.685826	0.269368	0.662795	0.750223	0.14137	1.26015	0.00404422
SMAC_01470.3_t1	1592.03	0.174015	0.755965	-0.239143	0.541703	-0.609768	0.0412044	-0.482607	0.167461	-0.0518408	0.919432	-0.0418365	0.941097	0.430766	0.297731	0.440771	0.268324
SMAC_01471.3_t1	960.438	-0.452417	0.532604	-1.65313	0.000856444	-3.37987	4.8847e-16	-2.14369	1.1708e-06	-2.04171	5.08663e-06	-2.17496	1.07943e-06	0.101979	0.906647	-0.0312693	0.971203
SMAC_01472.3_t1	6969.92	0.436861	0.534652	0.0306975	0.960392	-0.0622238	0.906361	-0.425726	0.437601	-0.485312	0.393517	-0.45465	0.450984	-0.0595858	0.943021	-0.0289245	0.971773
SMAC_01473.3_t1	1900.45	0.208522	0.728516	-0.144306	0.756535	4.08199	2.09055e-43	0.475239	0.217206	0.58674	0.13287	-0.285595	0.554136	0.1115	0.85147	-0.760835	0.0486567
SMAC_01474.3_t1	16990.5	-0.104651	0.866079	-0.597304	0.104322	-2.37936	1.04367e-16	-0.308893	0.431684	-0.341286	0.406128	0.288143	0.51638	-0.0323932	0.958205	0.597036	0.114831
SMAC_01475.3_t1	321.417	-0.190597	0.785402	0.309264	0.514472	0.992091	0.00485518	0.328892	0.487064	0.598621	0.177482	0.625467	0.169503	0.269729	0.652524	0.296575	0.591585
SMAC_01476.3_t1	621.531	-0.182328	0.828528	0.0961538	0.878971	2.10201	1.766e-07	0.089971	0.89615	-0.10984	0.879844	-0.0547016	0.945587	-0.199811	0.791806	-0.144673	0.847181
SMAC_01477.3_t1	349.439	-0.790016	0.117664	-0.321614	0.50227	-0.718922	0.0519101	-0.0731972	0.901843	-0.269357	0.611791	0.18679	0.761412	-0.19616	0.760288	0.259987	0.652989
SMAC_01478.3_t1	93.501	-0.167234	0.842775	0.357122	0.514317	1.7584	5.91499e-06	0.148264	0.816057	-1.23254	0.010942	-0.841014	0.13569	-1.38081	0.00588488	-0.989278	0.0742524
SMAC_01479.3_t1	182.787	-0.430254	0.596816	-0.409413	0.512967	0.397439	0.437512	1.35615	0.00665109	-0.334095	0.630665	-1.70413	0.00166322	-1.69025	0.00112408	-3.06029	8.20252e-10
SMAC_01480.3_t1	1716.22	1.35731	0.323934	2.62762	0.0134141	0.980156	0.308767	-0.949287	0.413892	-3.03965	0.0018265	-1.43645	0.219683	-2.09036	0.0614179	-0.487167	0.745137
SMAC_01481.3_t1	39.8952	-0.645217	0.603491	-1.47166	0.107296	-0.960031	0.203584	1.09013	0.18	0.85381	0.346966	0.372118	0.753838	-0.236318	0.852081	-0.71801	0.488379
SMAC_01482.3_t1	37.6686	-0.293017	0.774367	-0.991146	0.156395	0.13396	0.828229	0.698007	0.250328	1.06317	0.0660639	1.14942	0.055166	0.365164	0.655983	0.451418	0.552776
SMAC_01483.3_t1	160.417	-0.477486	0.440691	-0.408815	0.413663	1.57225	1.03952e-05	1.14371	0.00377223	0.0402308	0.951649	0.207076	0.747491	-1.10347	0.0107474	-0.936629	0.0365975
SMAC_01484.3_t1	28.8023	-0.703291	0.530095	-0.501264	0.573656	0.770962	0.218912	1.74396	0.00478473	0.638731	0.428761	1.8228	0.00493955	-1.10523	0.133462	0.078838	0.94499
SMAC_01485.3_t1	2245.55	-0.78107	0.115097	-0.140997	0.789653	-1.19721	0.000700157	1.01571	0.00881221	0.743917	0.0814479	1.58019	1.97053e-05	-0.271794	0.651619	0.564479	0.232056
SMAC_01486.3_t1	1963.78	0.0196739	0.962759	-0.0926383	0.743815	-0.971696	3.46508e-07	0.633989	0.00224647	0.796794	9.20809e-05	0.739898	0.000370728	0.162805	0.612275	0.105909	0.744519
SMAC_01487.3_t1	25.8916	0.375036	0.799324	-0.340392	0.760739	0.686268	0.390878	1.03009	0.247716	-0.917749	0.376078	0.0771114	0.959023	-1.94784	0.0350573	-0.952979	0.376715
SMAC_01488.3_t1	1.46154	-0.654769	NA	-0.62394	NA	4.7544	0.167034	0.539516	0.928508	0.446481	0.942675	-0.144362	NA	-0.0930351	NA	-0.683878	0.922975
SMAC_01489.3_t1	160.828	0.911362	0.0595498	0.372656	0.438994	-0.934797	0.0134105	-0.753714	0.0797765	-0.582709	0.21595	-1.09766	0.0135183	0.171005	0.803662	-0.343941	0.575859
SMAC_01490.3_t1	209.836	1.29387	0.0303198	-0.172319	0.805687	-1.49247	0.00174966	-0.605147	0.306364	-0.664506	0.279443	0.065826	0.942133	-0.0593594	0.95251	0.670973	0.308262
SMAC_01491.3_t1	400.992	0.193932	0.677526	-0.490619	0.12118	-1.64659	1.06378e-10	0.0386505	0.927269	0.0467975	0.915874	0.0181196	0.969547	0.008147	0.986907	-0.0205309	0.967772
SMAC_01492.3_t1	7499.08	-0.54486	0.178198	-0.502663	0.147915	-0.244221	0.432193	0.600174	0.0624714	0.318363	0.407391	0.405581	0.282072	-0.281811	0.526919	-0.194593	0.668056
SMAC_01493.3_t1	353.152	0.323758	0.582444	0.63214	0.132322	1.1965	0.000343044	-0.176859	0.728102	-0.393604	0.399747	-0.308115	0.556118	-0.216745	0.7213	-0.131256	0.832709
SMAC_01494.3_t1	1973.72	0.674666	0.103136	0.860487	0.0161687	1.28792	1.12085e-05	-0.199821	0.640896	-0.159437	0.73933	0.0820036	0.880289	0.0403838	0.94733	0.281825	0.539319
SMAC_01495.3_t1	762.781	-0.0805386	0.849025	0.356486	0.165467	0.456338	0.02945	-0.00784	0.980219	-0.207256	0.471379	-0.100037	0.78308	-0.199416	0.550642	-0.0921971	0.802626
SMAC_01496.3_t1	90.3244	-0.960115	0.0561447	-1.01457	0.0270117	-1.28098	0.000691053	0.776132	0.0496245	0.435972	0.35206	0.401865	0.435915	-0.34016	0.539228	-0.374267	0.484771
SMAC_01497.3_t1	4.06259	1.58714	NA	-0.278284	0.932943	-2.66601	0.301699	1.42938	0.59307	2.12752	0.404593	3.68562	NA	0.698146	NA	2.25625	0.367836
SMAC_01498.3_t1	706.74	-1.04982	0.0219844	0.462646	0.315877	-2.80627	1.8487e-15	-1.44827	0.000133817	-1.33534	0.000587223	-0.737289	0.100535	0.112924	0.871991	0.710977	0.125933
SMAC_01498.3_t2	0	NA	NA	NA	NA	NA	NA	NA	NA	NA	NA	NA	NA	NA	NA	NA	NA
SMAC_01499.3_t1	88.8316	-0.156417	0.846189	-0.103952	0.860663	-0.284084	0.523857	0.0870891	0.892613	0.296286	0.602227	0.734123	0.136892	0.209196	0.764753	0.647034	0.2163
SMAC_01500.3_t1	20.3396	-1.44809	0.120623	-1.10211	0.174893	-6.19483	0.000166749	-0.458053	0.599539	-0.894453	0.275362	-0.281844	0.801104	-0.436401	0.697109	0.176209	0.885643
SMAC_01501.3_t1	454.849	0.0128633	0.984104	-0.564132	0.146904	-1.59796	2.66038e-07	-0.155697	0.738954	0.441233	0.274477	0.548386	0.168972	0.59693	0.143775	0.704083	0.0657959
SMAC_01502.3_t1	2053.07	0.200205	0.700512	0.670339	0.0473894	0.861345	0.0019095	-0.366724	0.294375	-0.732075	0.022359	-0.524155	0.138745	-0.36535	0.372587	-0.15743	0.737809
SMAC_01503.3_t1	1303.54	-0.197672	0.683416	-0.330878	0.325238	-0.0816402	0.795027	-0.898667	0.00136743	-0.657431	0.030739	-0.289933	0.444257	0.241236	0.574267	0.608734	0.0583621
SMAC_01504.3_t1	1022.91	-0.348904	0.340394	-0.0260637	0.941782	-1.47733	1.45599e-10	0.160304	0.629942	-0.117048	0.756609	0.47308	0.104395	-0.277352	0.435107	0.312777	0.345315
SMAC_01505.3_t1	70.2612	-0.379731	0.590184	0.464183	0.350478	1.30769	0.000360246	0.202369	0.723511	0.782953	0.0823049	0.842301	0.0751832	0.580584	0.274132	0.639931	0.218951
SMAC_01506.3_t1	268.345	0.581082	0.297662	0.51237	0.268327	-4.01235	2.39681e-21	-0.727427	0.0907911	0.0174886	0.978566	-0.0564501	0.937223	0.744915	0.121311	0.670977	0.166858
SMAC_01507.3_t1	700.013	-0.337929	0.37748	-1.09519	6.12841e-05	-0.789106	0.00108174	-0.293368	0.339116	-1.04361	4.37108e-05	-1.14773	7.8536e-06	-0.750242	0.00846853	-0.854363	0.00194884
SMAC_01508.3_t1	767.699	0.4474	0.493585	0.965837	0.0425476	-0.0938681	0.846119	0.981147	0.0256813	-0.128318	0.8507	0.146879	0.835035	-1.10947	0.0180472	-0.834268	0.0896914
SMAC_01509.3_t1	657.476	0.527634	0.261086	0.365407	0.366699	-1.40337	7.09499e-06	0.591244	0.105352	0.446069	0.273397	0.692532	0.0685241	-0.145175	0.797156	0.101288	0.85731
SMAC_01510.3_t1	190.681	0.150112	0.829208	0.41414	0.348799	0.0870726	0.836569	-0.18704	0.714405	-0.0284488	0.963846	0.193867	0.741932	0.158591	0.80273	0.380906	0.465693
SMAC_01511.3_t1	14380	1.94606	2.19297e-07	1.43018	0.00035857	-3.1065	6.68895e-20	1.95063	4.18715e-08	3.52502	5.91888e-25	3.1943	9.9137e-21	1.57439	3.14671e-05	1.24367	0.00139515
SMAC_01512.3_t1	1306.19	0.318935	0.407122	0.408641	0.171586	-0.743709	0.00209736	0.0247125	0.950191	0.977569	0.000111618	0.983151	0.000111545	0.952857	0.00031702	0.958439	0.000219587
SMAC_01513.3_t1	1968.89	-1.30317	1.01973e-05	-0.582817	0.0753304	-4.51547	3.60785e-58	1.33895	7.93486e-07	1.24326	6.97075e-06	1.27138	4.05901e-06	-0.0956904	0.848627	-0.0675678	0.893726
SMAC_01514.3_t1	2617.81	0.0703872	0.901086	0.142102	0.709959	-1.01967	0.000107361	-0.961515	0.000678618	-0.264668	0.475174	-0.450189	0.193457	0.696847	0.0315461	0.511327	0.134982
SMAC_01515.3_t1	2373.95	1.04943	0.58914	1.36538	0.342142	-6.03694	4.07755e-08	-5.27727	5.13786e-06	-4.27493	0.000369709	-4.3672	0.000283298	1.00234	0.589492	0.910071	0.606876
SMAC_01516.3_t1	229.073	-0.29381	0.669024	1.59739	0.000102343	0.486157	0.215984	0.695359	0.107112	-1.1427	0.00704335	-0.947335	0.0408889	-1.83806	4.64474e-06	-1.64269	8.21202e-05
SMAC_01517.3_t1	437.125	-0.286071	0.661071	0.98438	0.0212831	0.358814	0.356552	-0.251804	0.619229	-0.992664	0.0152625	-0.477017	0.339273	-0.740861	0.112486	-0.225213	0.70958
SMAC_01518.3_t1	8.80366	-2.8194	0.285804	-0.0951928	0.955149	3.1539	0.000902401	1.25841	0.317806	-0.0804586	0.966809	0.0246361	0.989813	-1.33887	0.378746	-1.23378	0.461974
SMAC_01519.3_t1	45.8012	-0.836625	0.413621	-0.218623	0.807956	3.18801	7.63563e-10	0.609219	0.406953	0.568089	0.466001	0.854225	0.271659	-0.0411297	0.971424	0.245006	0.80878
SMAC_01520.3_t1	3.65078	1.65518	NA	1.27464	0.52821	3.31038	0.0177047	0.858671	0.699242	1.22234	0.563304	-2.0631	NA	0.363667	NA	-2.92177	0.297092
SMAC_01521.3_t1	4.78983	0.47558	0.878959	2.30587	0.182008	-3.69306	0.0830588	0.46504	0.843234	1.63947	0.387688	1.49224	0.481302	1.17443	0.615851	1.0272	0.661858
SMAC_01522.3_t1	4.1025	-2.83238	NA	-0.61774	0.775973	-4.4353	0.0300815	0.267195	0.904883	-0.0639405	0.979101	1.74823	NA	-0.331135	NA	1.48104	0.449414
SMAC_01523.3_t1	14.0828	0.0772133	0.962759	0.650029	0.508637	0.331712	0.700218	1.28994	0.116233	1.34865	0.112854	1.16674	0.226788	0.0587073	0.96458	-0.123203	0.930813
SMAC_01524.3_t1	649.872	0.0453552	0.94075	0.0199373	0.960445	2.81108	2.23938e-29	0.993198	0.000411531	0.616889	0.0502659	0.117338	0.806534	-0.376309	0.322454	-0.87586	0.00438603
SMAC_01525.3_t1	179.853	-0.0709314	0.944561	0.0760355	0.912565	-1.27992	0.00561507	-1.15524	0.0242391	-0.548663	0.372073	-0.507324	0.443904	0.60658	0.369568	0.647919	0.319033
SMAC_01526.3_t1	992.681	0.610835	0.275289	0.749358	0.0983733	0.778897	0.0393503	-0.696465	0.110067	-0.183251	0.75921	0.0852653	0.904518	0.513214	0.339247	0.78173	0.0934607
SMAC_01527.3_t1	191.698	-0.00798636	0.991676	-0.3858	0.412154	1.0333	0.00293018	0.718202	0.0746982	-0.136549	0.815986	-0.583517	0.227287	-0.854751	0.0491425	-1.30172	0.00129106
SMAC_01528.3_t1	452.947	0.33537	0.433494	-0.612353	0.0605176	0.295785	0.299575	-1.83981	9.85682e-12	-1.79014	3.89311e-11	-2.82283	2.04925e-22	0.049676	0.929627	-0.983017	0.00464325
SMAC_01529.3_t1	135.009	0.138906	0.872411	-0.574993	0.286173	-0.479213	0.288495	0.712335	0.142645	0.631459	0.230533	-0.404458	0.524325	-0.0808765	0.922078	-1.11679	0.0261538
SMAC_01530.3_t1	187.259	-0.355211	0.537205	-0.48844	0.25925	-0.105717	0.793768	-0.291347	0.525492	0.212709	0.67851	-0.726748	0.0922073	0.504056	0.291658	-0.435401	0.39129
SMAC_01532.3_t1	13.4021	-0.353453	0.822353	0.311375	0.774844	-1.41182	0.121232	0.710673	0.439721	1.29529	0.12074	1.46916	0.0886398	0.584617	0.598546	0.758484	0.460568
SMAC_01534.3_t1	3.36129	2.03298	NA	3.64479	0.0992217	-1.70778	0.518647	2.76224	0.214336	2.89845	0.209715	3.04776	NA	0.136209	NA	0.285523	0.927306
SMAC_01535.3_t1	0.723419	-0.52744	NA	2.03492	NA	-0.735604	0.898189	0.692425	0.928508	1.87397	0.799857	2.76861	NA	1.18155	NA	2.07619	0.787685
SMAC_01537.3_t1	151.669	-1.44275	0.00321314	-2.02441	1.22344e-05	-1.58288	8.88095e-05	0.345167	0.521956	-0.873751	0.0690453	-1.78443	6.89848e-05	-1.21892	0.00977609	-2.1296	1.42706e-06
SMAC_01538.3_t1	92.963	-0.420312	0.495271	0.114448	0.831472	-0.0707226	0.87395	0.350426	0.457396	-0.49238	0.30678	0.107493	0.87369	-0.842806	0.0663373	-0.242934	0.691784
SMAC_01539.3_t1	608.914	0.366264	0.503371	0.397046	0.346347	-0.307536	0.394774	-1.86141	3.08245e-08	-1.4543	2.80396e-05	-1.61098	3.96905e-06	0.407103	0.422542	0.250429	0.647383
SMAC_01540.3_t1	318.176	-0.389136	0.479297	-0.424282	0.32168	-0.571038	0.0986188	-1.68028	1.15391e-06	-1.09447	0.00286124	-1.26913	0.000579282	0.585817	0.208519	0.411155	0.417543
SMAC_01541.3_t1	70.7082	-0.459964	0.559322	-1.41456	0.0146664	-0.609717	0.213738	0.479578	0.412562	-0.49708	0.428761	-0.886814	0.147432	-0.976657	0.0938097	-1.36639	0.0145164
SMAC_01542.3_t1	178.281	0.27717	0.772602	0.850768	0.162847	3.36917	2.91713e-13	-0.380115	0.585962	-1.23918	0.0380532	-0.23848	0.788988	-0.859068	0.228566	0.141635	0.883231
SMAC_01543.3_t1	82.3835	-0.171852	0.816835	-0.734144	0.118127	-0.230152	0.58159	0.00169073	0.997572	0.34481	0.489826	0.172366	0.790685	0.343119	0.556021	0.170676	0.7957
SMAC_01544.3_t1	335.518	0.472101	0.326048	0.60518	0.112668	0.256784	0.458509	-0.389938	0.325067	0.0641064	0.906491	-0.130865	0.814153	0.454044	0.310172	0.259072	0.603956
SMAC_01545.3_t1	268.709	0.162587	0.791991	0.508139	0.189048	1.83769	4.79287e-10	-1.43922	1.72361e-05	-1.81742	4.76827e-08	-1.58565	8.54078e-06	-0.378204	0.475549	-0.146428	0.815681
SMAC_01546.3_t1	394.872	0.215441	0.755965	0.453257	0.325279	1.55879	8.34077e-06	-0.828427	0.0447641	-0.706801	0.111343	-1.11042	0.00820243	0.121626	0.861472	-0.281989	0.636645
SMAC_01547.3_t1	1145.57	-1.94249	0.00869162	-3.11946	2.25337e-06	-5.94343	7.2654e-24	-2.36274	0.000200463	-1.0453	0.16887	-2.12033	0.00132956	1.31744	0.0865872	0.242404	0.820221
SMAC_01548.3_t1	4918.51	-1.23849	0.0261729	-3.09677	7.4628e-12	0.508515	0.278579	-5.26022	9.48511e-36	-2.82809	9.23051e-11	-4.61197	1.62136e-27	2.43212	9.54457e-08	0.648249	0.290088
SMAC_01549.3_t1	153.644	-0.28821	0.557334	0.125414	0.763103	0.0170947	0.960302	0.63164	0.0424644	0.68322	0.0312469	0.739962	0.0235923	0.0515794	0.925542	0.108322	0.827738
SMAC_01550.3_t1	268.198	-0.217244	0.742688	-0.104637	0.838655	-0.836794	0.0179725	-0.00491393	0.992786	-0.304764	0.5351	0.0202366	0.975502	-0.29985	0.600664	0.0251505	0.971199
SMAC_01551.3_t1	108.448	-0.504071	0.507845	-0.772254	0.176574	-0.766746	0.105356	-0.0319764	0.96355	0.33468	0.610655	0.607115	0.323269	0.366656	0.624662	0.639091	0.306917
SMAC_01552.3_t1	293.799	0.604795	0.335956	0.552309	0.284722	0.352727	0.43276	-0.453097	0.390929	0.147723	0.828558	-0.343652	0.587033	0.60082	0.30028	0.109445	0.888618
SMAC_01553.3_t1	359.837	0.503789	0.366776	0.663864	0.130056	-0.683104	0.0652454	-0.110941	0.845733	0.612976	0.167644	0.845173	0.0461676	0.723917	0.115801	0.956114	0.0226943
SMAC_01554.3_t1	517.887	-0.117303	0.832364	-0.244081	0.505973	-2.10222	1.91823e-14	0.0437879	0.923459	0.489449	0.147602	0.483537	0.168235	0.445661	0.233562	0.439749	0.230673
SMAC_01555.3_t1	485.213	0.520675	0.170294	0.575718	0.0748231	0.120268	0.696551	0.111565	0.784177	0.642251	0.0361293	0.646014	0.0402089	0.530685	0.121591	0.534448	0.113211
SMAC_01556.3_t1	286.642	0.690005	0.0313715	0.521106	0.0896303	2.3011	9.74953e-24	-0.522618	0.0797166	0.00909449	0.982865	0.0499624	0.921993	0.531713	0.113358	0.572581	0.0882129
SMAC_01557.3_t1	2917.93	0.199065	0.761305	0.752607	0.070743	2.91532	2.48107e-19	0.254348	0.596352	-0.171549	0.755263	-0.243998	0.653957	-0.425897	0.401515	-0.498346	0.290673
SMAC_01557.3_t2	0	NA	NA	NA	NA	NA	NA	NA	NA	NA	NA	NA	NA	NA	NA	NA	NA
SMAC_01558.3_t1	1837.09	2.26687	9.07955e-12	0.553089	0.172315	3.8025	1.26617e-35	-0.235256	0.61111	0.921658	0.0119494	-0.144061	0.80253	1.15691	0.0017127	0.0911953	0.881936
SMAC_01559.3_t1	1909.69	-0.838134	0.0336702	-1.01219	0.00486154	1.9004	8.38014e-11	-1.28814	4.90991e-05	-1.01686	0.00228415	-1.22144	0.000182449	0.271283	0.590353	0.0667036	0.909975
SMAC_01560.3_t1	547.957	0.958519	0.211399	-0.072143	0.927804	-1.25515	0.0185194	-0.0745679	0.931859	-0.0610935	0.947207	-0.258684	0.775443	0.0134743	0.988796	-0.184116	0.843761
SMAC_01561.3_t1	1252.96	-1.68532	8.19411e-05	-1.6441	0.000135041	-7.82692	3.45598e-54	0.270785	0.615119	-0.0364707	0.957637	-0.316113	0.588446	-0.307256	0.630929	-0.586899	0.254579
SMAC_01562.3_t1	881.428	0.270492	0.493089	-0.323532	0.288653	-1.54365	4.69411e-11	-0.192384	0.557173	0.740763	0.00465674	0.130122	0.748814	0.933147	0.000385401	0.322505	0.339561
SMAC_01563.3_t1	106.893	0.171337	0.798111	0.0796113	0.876311	-0.534977	0.137015	0.034174	0.950323	0.516167	0.219406	0.462899	0.318558	0.481993	0.309739	0.428725	0.383622
SMAC_01564.3_t1	602.924	0.0355452	0.958994	-0.438897	0.279292	-0.139478	0.706108	-0.171413	0.715836	-0.0837361	0.879844	0.101478	0.860393	0.0876771	0.887022	0.272891	0.581893
SMAC_01565.3_t1	333.654	-0.481081	0.470317	0.368088	0.493027	-0.199329	0.671004	-1.02851	0.023806	-0.421864	0.44918	-0.0160688	0.983551	0.606643	0.294341	1.01244	0.0391145
SMAC_01566.3_t1	2508.46	-0.25254	0.515171	-0.0310562	0.930062	0.457251	0.0539793	-0.29567	0.310763	-0.446545	0.116715	-0.376744	0.215715	-0.150875	0.709749	-0.0810739	0.845495
SMAC_01567.3_t1	1987.37	0.258072	0.405537	0.404461	0.0873259	1.24809	1.6747e-11	-0.517278	0.0161089	-0.535581	0.0150793	-0.510134	0.0252989	-0.0183028	0.962889	0.00714441	0.984162
SMAC_01568.3_t1	2836.18	0.353982	0.355491	0.504029	0.0931951	0.197349	0.471428	-0.626957	0.0222691	-0.0929915	0.820823	0.20052	0.59514	0.533965	0.0873773	0.827477	0.00261943
SMAC_01569.3_t1	798.07	0.0487704	0.930951	-0.406075	0.198447	-1.35913	4.30315e-08	0.314659	0.318854	0.569306	0.0540102	-0.110618	0.802557	0.254647	0.520302	-0.425277	0.202597
SMAC_01570.3_t1	202.136	-0.56577	0.350317	0.845359	0.0695033	0.250715	0.564583	-0.539443	0.259518	-0.620308	0.20684	-0.9654	0.0414109	-0.0808651	0.918814	-0.425957	0.480334
SMAC_01571.3_t1	87.5625	-1.03946	0.0984295	-0.990218	0.0755852	-5.93093	1.19218e-15	-1.92191	7.03204e-05	-0.972198	0.071974	-0.659991	0.283379	0.949709	0.120696	1.26192	0.0247216
SMAC_01572.3_t1	701.087	0.0305285	0.957959	-0.433621	0.190265	-0.421171	0.126568	0.516458	0.0897816	1.01757	0.000245839	0.528653	0.105675	0.501109	0.143409	0.012195	0.980939
SMAC_01573.3_t1	550.057	1.16958	0.0405169	0.813611	0.132473	2.02934	1.88445e-06	0.0743215	0.919599	0.288141	0.664487	-0.206766	0.789034	0.21382	0.788055	-0.281087	0.702539
SMAC_01574.3_t1	961.208	0.203696	0.793064	0.521305	0.29756	0.87406	0.0280494	0.884872	0.0466192	0.0658452	0.923133	-0.337288	0.57441	-0.819027	0.102629	-1.22216	0.00626791
SMAC_01575.3_t1	329.754	-0.118283	0.799414	-0.343708	0.245858	-1.0667	4.90727e-06	-0.714752	0.00505467	-0.0522535	0.899407	0.226792	0.513785	0.662498	0.0190032	0.941544	0.000276692
SMAC_01576.3_t1	920.784	0.830753	0.323095	1.14692	0.0834484	2.43512	4.3478e-06	-0.70742	0.300946	-1.51206	0.0148402	-1.01797	0.141974	-0.804638	0.300336	-0.310553	0.735303
SMAC_01577.3_t1	2823.64	1.97362	0.000468433	1.69218	0.00331697	-1.21402	0.0149836	-1.5837	0.00293165	-2.73468	5.53042e-08	-2.41541	2.50599e-06	-1.15098	0.0638312	-0.83171	0.205704
SMAC_01578.3_t1	287.164	0.0153877	0.98009	0.340116	0.401254	1.67352	1.46439e-08	0.0844587	0.866937	-0.133652	0.794441	-0.0884071	0.878688	-0.218111	0.686533	-0.172866	0.74759
SMAC_01580.3_t1	132.671	-0.199428	0.81502	0.284617	0.62798	1.7509	1.50577e-05	-0.550112	0.304969	-0.845102	0.106939	-0.454559	0.477159	-0.294989	0.698733	0.0955533	0.911007
SMAC_01581.3_t1	1802.08	0.534938	0.0490717	0.639026	0.00891846	0.968586	1.31615e-06	0.339563	0.168034	-0.0160261	0.965088	-0.140782	0.671503	-0.355589	0.202781	-0.480345	0.0571156
SMAC_01582.3_t1	4248.26	0.117393	0.770818	0.239707	0.372821	0.380306	0.0759743	-0.165456	0.564792	-0.380497	0.140602	-0.498401	0.0446559	-0.215041	0.513089	-0.332945	0.232716
SMAC_01583.3_t1	1400.34	0.13423	0.691279	0.329552	0.143451	-0.153661	0.448203	-0.385775	0.0663722	-0.652604	0.000935312	-0.496869	0.0200457	-0.266829	0.307738	-0.111095	0.719093
SMAC_01584.3_t1	505.79	-0.398498	0.523844	-1.27215	0.00386737	-0.982006	0.00892764	0.0245982	0.965613	-0.000187116	0.999852	-0.152514	0.816229	-0.0247853	0.974702	-0.177112	0.785147
SMAC_01585.3_t1	567.921	0.258432	0.577893	-0.0609479	0.882227	-0.12555	0.689713	-0.23874	0.513717	0.107635	0.810011	0.0934556	0.84887	0.346375	0.384567	0.332196	0.398828
SMAC_01586.3_t1	2810.94	-0.274497	0.396052	-0.415955	0.0936361	-0.738115	0.000229683	-0.306235	0.214122	-0.395524	0.110369	-0.353183	0.176093	-0.0892896	0.810262	-0.0469483	0.903801
SMAC_01587.3_t1	893.998	-0.141852	0.825258	0.175555	0.698185	-0.259373	0.463031	-0.0120734	0.980219	-0.222149	0.640931	-0.276665	0.56663	-0.210076	0.703476	-0.264592	0.59302
SMAC_01588.3_t1	1458.64	0.326616	0.330025	0.744337	0.00319479	0.829999	9.22824e-05	-0.132759	0.671878	-0.252669	0.391444	-0.00723395	0.986283	-0.11991	0.758128	0.125526	0.731101
SMAC_01589.3_t1	2458.4	-0.00469163	0.994034	-0.124539	0.754812	-0.296914	0.314826	-1.05325	0.000249344	-0.751957	0.0154241	-0.663347	0.0408889	0.301289	0.478031	0.389899	0.304622
SMAC_01589.3_t2	0	NA	NA	NA	NA	NA	NA	NA	NA	NA	NA	NA	NA	NA	NA	NA	NA
SMAC_01590.3_t1	46.9733	0.0868797	0.941166	0.313031	0.670276	1.04667	0.038538	0.734681	0.229015	1.59493	0.00272233	1.62692	0.00307275	0.860249	0.182841	0.89224	0.161189
SMAC_01591.3_t1	212.551	0.480506	0.304531	0.391098	0.319399	0.301216	0.365669	0.956842	0.00304839	1.3331	1.78263e-05	1.07948	0.00109927	0.376256	0.385804	0.12264	0.817431
SMAC_01592.3_t1	155.157	0.17629	0.801391	-0.176481	0.731515	-0.216242	0.590711	-0.17299	0.743084	0.296365	0.551369	-0.263266	0.643681	0.469356	0.35848	-0.0902757	0.896821
SMAC_01593.3_t1	128.519	0.166807	0.832006	0.516073	0.295435	1.69736	4.01427e-06	-0.191065	0.745286	0.397058	0.451906	0.293029	0.6365	0.588124	0.283084	0.484094	0.403119
SMAC_01594.3_t1	493.64	-1.26909	0.203878	-1.57584	0.0579058	-5.3893	3.35115e-15	-1.95155	0.00910574	-1.3934	0.0920208	-0.07658	0.952761	0.558151	0.62713	1.87497	0.0185735
SMAC_01595.3_t1	1315.24	-0.786227	0.00442801	-1.09044	1.78441e-05	-0.706528	0.00202003	-1.92314	1.36761e-17	-2.04592	1.26438e-19	-2.66166	1.52074e-31	-0.12278	0.770459	-0.738521	0.006867
SMAC_01596.3_t1	988.335	-0.060678	0.901679	-0.288572	0.330546	-0.683005	0.00316356	-1.38447	2.83919e-09	-1.1795	7.30891e-07	-1.39211	5.11104e-09	0.204978	0.597644	-0.00763824	0.985494
SMAC_01597.3_t1	1915.95	-0.621865	0.14815	-0.059839	0.89674	-2.29782	6.73443e-15	1.15131	0.0002852	0.915242	0.00644911	1.62248	1.27454e-07	-0.236068	0.64365	0.471167	0.243491
SMAC_01599.3_t1	1064.29	0.41438	0.249883	0.180534	0.583819	-0.0995298	0.722401	-0.33145	0.268344	-0.422003	0.161925	-0.601308	0.0367001	-0.0905535	0.841237	-0.269858	0.454749
SMAC_01600.3_t1	731.007	-0.539805	0.132391	-0.536397	0.0864823	0.894701	0.00033068	-0.626367	0.0285122	-0.36455	0.270994	-0.0558856	0.910399	0.261817	0.518856	0.570481	0.0720374
SMAC_01601.3_t1	38051.4	0.591911	0.206174	0.93865	0.0138722	-0.00724514	0.985474	-0.0551999	0.917989	-0.097334	0.860911	0.390798	0.38064	-0.0421342	0.948217	0.445998	0.314194
SMAC_01601.3_t2	0	NA	NA	NA	NA	NA	NA	NA	NA	NA	NA	NA	NA	NA	NA	NA	NA
SMAC_01602.3_t1	4084.23	0.972023	0.0409467	0.449169	0.335763	0.847148	0.021714	-0.655111	0.127422	-0.00727727	0.991009	0.35154	0.514707	0.647833	0.185185	1.00665	0.0175219
SMAC_01603.3_t1	1855.73	-0.207354	0.768923	-0.189635	0.718926	0.999666	0.00627105	-0.0349419	0.953463	-0.0125178	0.983575	0.129362	0.843065	0.0224241	0.976881	0.164304	0.796946
SMAC_01604.3_t1	959.009	-0.386804	0.400372	-0.521885	0.142926	-0.0584664	0.867708	-0.390115	0.274449	-0.513545	0.15092	-0.271998	0.525785	-0.123431	0.815476	0.118116	0.816623
SMAC_01605.3_t1	4112.4	0.324522	0.421171	0.123574	0.734969	0.180862	0.522603	0.346441	0.265319	-0.121801	0.76401	-0.032515	0.945913	-0.468242	0.158446	-0.378956	0.266953
SMAC_01606.3_t1	3570.01	-0.0602309	0.918656	-0.0922538	0.817344	-8.37925	1.05826e-119	-0.344443	0.309907	-0.92812	0.00153434	-0.84771	0.00484088	-0.583677	0.0886127	-0.503267	0.147263
SMAC_01607.3_t1	568.835	-0.509131	0.119593	-0.061163	0.860568	-1.49204	7.86919e-11	-0.657788	0.0104244	-1.09885	6.72292e-06	-0.84622	0.00109184	-0.441062	0.160907	-0.188431	0.617256
SMAC_01608.3_t1	1629.2	0.564855	0.228556	0.728901	0.0589065	0.863183	0.00666287	0.17642	0.705867	0.114588	0.83014	-0.0864116	0.880753	-0.0618315	0.923095	-0.262831	0.595875
SMAC_01609.3_t1	23012.3	-0.00879871	0.989641	0.316679	0.432464	-0.0662887	0.859739	0.0123347	0.9793	0.131799	0.794561	-0.161381	0.757781	0.119464	0.834264	-0.173715	0.733817
SMAC_01610.3_t1	2642.26	-0.170684	0.847585	-1.09549	0.0380782	-0.702502	0.122856	0.0441588	0.951023	0.0895127	0.90716	0.142808	0.856579	0.0453539	0.959493	0.098649	0.905767
SMAC_01611.3_t1	2057.15	0.259085	0.604687	0.367665	0.315141	0.21923	0.493485	0.0666559	0.887369	0.222055	0.597009	0.711953	0.0340767	0.155399	0.76166	0.645298	0.0650042
SMAC_01612.3_t1	3399.17	-0.121813	0.826956	-0.370946	0.293721	-0.95769	0.000489404	1.06351	0.000245704	1.15959	6.65831e-05	1.35241	1.99432e-06	0.0960829	0.853399	0.288905	0.483519
SMAC_01613.3_t1	11577.1	-0.235257	0.770482	0.099701	0.87388	0.0534537	0.919298	0.459294	0.394193	-0.440166	0.442538	-0.657247	0.230551	-0.899461	0.088835	-1.11654	0.0219329
SMAC_01614.3_t1	929.789	-0.191406	0.779519	0.525154	0.232116	-1.35332	0.000101061	0.259869	0.597657	-0.181545	0.745651	0.459659	0.340937	-0.441414	0.394154	0.19979	0.732803
SMAC_01615.3_t1	507.307	-0.0602482	0.912454	-0.264157	0.431463	0.82154	0.00094251	-0.196	0.577529	-0.158718	0.68226	0.52505	0.0919343	0.0372817	0.941162	0.72105	0.0146043
SMAC_01616.3_t1	445.521	0.245115	0.578115	0.134401	0.716312	-3.09026	2.62896e-29	-0.340281	0.289766	0.222775	0.540467	0.160138	0.705281	0.563057	0.0843257	0.500419	0.132894
SMAC_01617.3_t1	1286.3	0.0898554	0.913042	-0.110632	0.845381	-0.187797	0.672349	-0.317542	0.545411	-0.134244	0.835628	0.241832	0.69848	0.183298	0.791965	0.559374	0.288298
SMAC_01619.3_t1	45.3351	-1.02691	0.265976	-1.34943	0.0751277	-4.15706	1.35043e-08	-2.99851	1.1572e-05	-1.70969	0.0148402	-0.103312	0.929735	1.28881	0.152827	2.89519	5.38926e-05
SMAC_01620.3_t1	557.705	1.47225	6.65167e-07	0.134822	0.740017	-0.509406	0.0791383	-0.107636	0.803685	0.375923	0.304424	-0.598518	0.0886966	0.483559	0.200736	-0.490882	0.192893
SMAC_01621.3_t1	335.451	0.955386	0.143024	0.605497	0.306933	1.38481	0.00261621	-0.360524	0.578105	0.118885	0.883386	0.0331526	0.96939	0.479409	0.515467	0.393676	0.589359
SMAC_01622.3_t1	653.026	0.00331905	0.99754	1.0264	0.156497	-2.62761	5.8121e-06	-0.372585	0.65715	0.0363969	0.971303	-0.123915	0.913747	0.408981	0.685865	0.24867	0.80855
SMAC_01623.3_t1	877.807	0.0785591	0.886376	0.274862	0.422081	1.02614	5.84292e-05	-0.421941	0.179779	-0.694698	0.0204247	-0.660462	0.0341967	-0.272757	0.512002	-0.238521	0.559187
SMAC_01624.3_t1	997.107	0.108917	0.884825	0.628478	0.156352	0.49231	0.192222	-0.0713829	0.903728	-0.63964	0.151567	-0.421496	0.406941	-0.568257	0.25169	-0.350113	0.521803
SMAC_01625.3_t1	139.093	0.16022	0.786122	-0.00771336	0.986649	0.837469	0.00443668	-0.0554053	0.911643	-0.284273	0.503382	-0.0758687	0.896286	-0.228868	0.660614	-0.0204634	0.974265
SMAC_01626.3_t1	763.254	0.281184	0.450349	0.251579	0.399907	-0.0638861	0.818232	0.642945	0.010003	-0.352724	0.231857	-0.28495	0.37995	-0.995669	5.59835e-05	-0.927896	0.000208561
SMAC_01627.3_t1	836.606	-0.131061	0.862117	0.736869	0.0944787	4.32532	3.6519e-38	-1.39354	0.000379313	-2.10852	4.69065e-08	-0.892054	0.0463934	-0.714978	0.171368	0.501487	0.362341
SMAC_01628.3_t1	2751.79	0.758601	0.134988	0.726525	0.100854	0.0529866	0.907542	-0.424746	0.359491	0.0525016	0.932414	-0.165884	0.792817	0.477248	0.366747	0.258863	0.656926
SMAC_01629.3_t1	1446.49	-0.0514169	0.919353	-0.0975282	0.776706	0.873098	0.000122383	0.619581	0.0151397	0.304365	0.320675	0.475334	0.0968895	-0.315216	0.344338	-0.144247	0.707237
SMAC_01630.3_t1	2884.26	-0.867961	0.0760161	-1.03983	0.0160856	2.00661	8.86527e-09	-0.353166	0.458854	-0.684778	0.123495	0.0752137	0.914501	-0.331612	0.572092	0.42838	0.411836
SMAC_01631.3_t1	47.5258	0.864355	0.257555	0.716467	0.268685	0.00314193	0.996093	0.462348	0.500714	0.924527	0.136685	0.638831	0.381825	0.462179	0.570988	0.176483	0.850239
SMAC_01632.3_t1	167.391	0.554738	0.478192	0.696905	0.24278	0.589514	0.243731	-1.31204	0.0143869	-1.96419	0.000169082	-1.63957	0.00327553	-0.652155	0.376211	-0.327527	0.70103
SMAC_01633.3_t1	208.236	-0.18625	0.782364	0.536795	0.206256	-0.344336	0.36006	0.599796	0.132281	0.88693	0.0209752	0.848824	0.0340767	0.287134	0.605252	0.249028	0.645485
SMAC_01634.3_t1	895.088	0.123572	0.761446	0.483973	0.0603383	0.752067	0.000297842	0.595651	0.00987857	0.636089	0.00657218	1.00901	3.89086e-06	0.0404383	0.923587	0.413356	0.122852
SMAC_01635.3_t1	922.83	0.0449829	0.951585	0.654145	0.0922073	-0.466325	0.164098	-0.0484479	0.927542	-0.361057	0.407391	-0.275619	0.570578	-0.312609	0.539013	-0.227171	0.660194
SMAC_01636.3_t1	301.608	-0.00956315	0.990345	-0.0836795	0.882177	0.170683	0.69062	0.887769	0.0309712	0.521255	0.276299	0.446908	0.389965	-0.366514	0.528236	-0.44086	0.408813
SMAC_01637.3_t1	896.611	0.131214	0.8438	0.617194	0.127179	0.659472	0.0497611	0.263803	0.560163	0.114105	0.837638	-0.0837333	0.891233	-0.149699	0.802922	-0.347537	0.481547
SMAC_01638.3_t1	1838.94	-0.494122	0.346015	-0.55362	0.188053	-1.05336	0.00175642	0.0874414	0.873641	-0.0978933	0.867508	0.0845729	0.892851	-0.185335	0.759192	-0.00286851	0.995682
SMAC_01639.3_t1	328.013	-0.164653	0.694237	-0.519637	0.0614891	-0.262001	0.278213	-0.632091	0.0110471	-0.317597	0.277416	-0.979585	9.43698e-05	0.314495	0.340663	-0.347493	0.297382
SMAC_01640.3_t1	805.633	0.177633	0.746827	0.366669	0.319686	-0.122171	0.715915	-0.495884	0.14842	-0.653059	0.0562823	-0.764233	0.0243917	-0.157175	0.762339	-0.268349	0.550789
SMAC_01641.3_t1	94.6629	0.287593	0.808516	1.40229	0.0476684	0.201162	0.775875	1.42509	0.0289215	1.81754	0.00449661	1.89067	0.0033813	0.392448	0.691812	0.465575	0.603956
SMAC_01642.3_t1	814.785	0.803957	0.11007	1.07564	0.0128617	1.01172	0.00533863	-0.0644476	0.915447	-0.119136	0.849397	-0.135077	0.835635	-0.0546886	0.940629	-0.0706298	0.921545
SMAC_01643.3_t1	316.651	0.0522926	0.957882	-0.554913	0.338294	0.602841	0.202774	0.342024	0.583963	-0.140874	0.856656	-0.041058	0.961997	-0.482898	0.489816	-0.383082	0.583418
SMAC_01644.3_t1	279.079	-0.636863	0.277576	-0.424326	0.400022	-2.12303	3.86333e-08	-0.110127	0.858977	-0.530558	0.294412	0.0665231	0.928747	-0.42043	0.484399	0.17665	0.794326
SMAC_01645.3_t1	889.293	0.0209245	0.97499	0.0580927	0.907722	-0.8431	0.0107018	-0.0305684	0.954229	0.916265	0.0123993	1.11913	0.00164509	0.946833	0.0139948	1.1497	0.00139515
SMAC_01646.3_t1	1053.82	-0.0987438	0.827458	0.0417973	0.903394	-0.531321	0.0200721	-0.0585665	0.872292	0.342051	0.234389	0.572469	0.0292479	0.400618	0.182681	0.631036	0.0156491
SMAC_01647.3_t1	104.045	-0.271548	0.625494	0.199365	0.643323	0.597041	0.0519582	-0.00458345	0.992335	-0.0961298	0.856508	0.0980203	0.864004	-0.0915464	0.878703	0.102604	0.861042
SMAC_01649.3_t1	2177.48	-0.0980736	0.878994	-1.18147	0.000872251	-1.94248	7.98664e-11	-1.80269	6.2641e-09	-1.41535	1.10833e-05	-1.4778	4.07871e-06	0.387334	0.400412	0.324889	0.485229
SMAC_01650.3_t1	379.295	0.364426	0.515171	0.255622	0.575366	-2.32283	3.05983e-12	-2.62619	1.55208e-14	-2.23572	7.20798e-11	-2.94097	2.5896e-16	0.390475	0.482345	-0.314777	0.593183
SMAC_01651.3_t1	461.638	0.134471	0.80535	0.678544	0.0384625	0.585373	0.0339356	0.46278	0.151133	0.353114	0.326827	0.309709	0.430563	-0.109667	0.825855	-0.153071	0.739686
SMAC_01652.3_t1	1.9384	-0.542237	NA	-0.51142	0.909105	5.08142	0.0470283	-0.859243	0.854899	2.10023	0.585471	2.41629	NA	2.95947	NA	3.27553	0.405091
SMAC_01653.3_t1	0.794964	-3.27127	NA	0.0225983	NA	-3.47944	0.392863	-1.26398	0.821216	-3.71057	0.471379	-1.38391	NA	-2.44658	NA	-0.119925	0.985569
SMAC_01654.3_t1	246.748	-1.05417	0.048731	-0.117032	0.842703	2.2981	9.146e-10	-2.90193	1.96277e-11	-1.84089	1.67731e-05	-0.411337	0.48547	1.06104	0.060254	2.4906	5.11859e-08
SMAC_01655.3_t1	55.0525	-0.879949	0.193956	-0.646767	0.267705	1.38457	0.0011641	-1.3811	0.00719255	-1.08257	0.0443339	-1.6945	0.00354332	0.298534	0.732452	-0.313394	0.735611
SMAC_01656.3_t1	5627.98	-0.226348	0.754927	-1.40102	0.00132404	-4.95433	5.89439e-43	-1.39043	0.000503419	0.117535	0.857944	-0.830684	0.0705898	1.50797	0.00029216	0.55975	0.278696
SMAC_01657.3_t1	546.477	-0.679997	0.0973253	-0.652916	0.0729773	-2.31701	4.28379e-15	0.191296	0.649469	0.531435	0.145237	0.724564	0.0370857	0.340139	0.447577	0.533268	0.161227
SMAC_01658.3_t1	96.625	0.0856787	0.939743	-0.014799	0.984189	-2.50377	8.57551e-06	0.846966	0.142645	1.38199	0.0112199	1.31106	0.0205457	0.535025	0.471269	0.46409	0.530057
SMAC_01660.3_t1	138.498	0.455253	0.519454	0.26464	0.656606	-0.436884	0.345982	-1.6664	0.000301011	-1.50662	0.00138241	-1.48779	0.00275219	0.159777	0.851422	0.178612	0.829781
SMAC_01661.3_t1	4164.01	0.543305	0.170766	0.683647	0.0409675	0.988825	0.000297428	0.802919	0.00788179	-0.895004	0.00332398	-0.689261	0.0349111	-1.69792	1.76029e-09	-1.49218	1.71101e-07
SMAC_01662.3_t1	379.115	-0.361123	0.595282	0.539397	0.268375	0.0102286	0.983279	1.73277	9.44226e-06	1.56422	9.60617e-05	2.44448	1.2145e-10	-0.168544	0.806481	0.711718	0.139448
SMAC_01663.3_t1	10457.6	-1.35386	0.0110546	-1.35996	0.0080431	-1.97214	3.17461e-06	-0.655425	0.213664	-0.299232	0.645024	0.275753	0.695698	0.356193	0.622469	0.931178	0.0818414
SMAC_01664.3_t1	46.5976	0.650411	0.586014	0.50411	0.596384	-3.67102	0.000119898	-0.591739	0.541467	1.93409	0.0110113	0.891125	0.352916	2.52583	0.00127587	1.48286	0.0962526
SMAC_01665.3_t1	1034.55	0.701999	0.0349073	-0.326984	0.327253	0.714502	0.00547692	0.096799	0.809804	2.53551	7.97932e-25	0.109694	0.809871	2.43871	1.63963e-22	0.012895	0.979791
SMAC_01666.3_t1	9282.87	-0.0366195	0.958782	-0.652127	0.0997784	-2.44101	3.80274e-15	1.00207	0.00418193	1.62772	9.27949e-07	1.43996	2.01246e-05	0.625652	0.139425	0.437888	0.332274
SMAC_01667.3_t1	13.7787	-0.0216388	0.989228	-0.341921	0.754812	1.65938	0.0122741	-0.00203533	0.998656	0.0889957	0.94175	-0.308673	0.825435	0.0910311	0.951623	-0.306637	0.831364
SMAC_01668.3_t1	302.138	-0.857635	0.43864	-1.43918	0.0863769	-1.87057	0.00667836	-0.983716	0.242677	-1.05285	0.231263	0.096442	0.941363	-0.069137	0.960784	1.08016	0.239033
SMAC_01669.3_t1	0.468328	2.25824	NA	0.809065	NA	-0.73371	0.910953	0.558996	0.948157	1.29285	0.885112	-0.0151433	NA	0.733858	NA	-0.57414	0.954742
SMAC_01670.3_t1	0.0721982	0.869012	NA	0.899817	NA	0.660849	0.931614	2.11088	0.831625	0.42972	0.967647	1.37941	NA	-1.68116	NA	-0.731467	0.952105
SMAC_01671.3_t1	618.421	0.112498	0.859988	1.10327	0.00193292	1.16653	0.000111006	0.288789	0.48231	0.087716	0.870096	0.87658	0.0126451	-0.201073	0.708552	0.587791	0.136192
SMAC_01672.3_t1	6.17235	-0.715737	0.749516	-1.07966	0.4983	-1.81728	0.163284	-2.42296	0.110885	-0.926144	0.586059	-1.31331	0.475307	1.49681	0.465835	1.10965	0.618291
SMAC_01673.3_t1	77.5407	-0.41276	0.493089	-0.263105	0.596384	-0.82331	0.0267313	-2.19413	4.01688e-08	-1.5407	9.92143e-05	-0.838632	0.0696571	0.653428	0.260473	1.3555	0.00449099
SMAC_01674.3_t1	1128.8	0.34602	0.487441	0.402933	0.293139	0.584475	0.0580056	-0.436158	0.239274	-0.407346	0.30474	-0.298539	0.503745	0.0288119	0.96237	0.137619	0.795557
SMAC_01675.3_t1	769.813	-0.326529	0.422208	-1.35809	8.71813e-07	-0.920752	0.00024025	-1.80522	8.66384e-13	-1.55516	1.21147e-09	-2.12673	1.01812e-16	0.250057	0.546519	-0.321517	0.400192
SMAC_01676.3_t1	1197.25	0.110405	0.725625	-0.0524567	0.831472	0.0564293	0.775078	-0.474336	0.00954653	-0.0253909	0.928638	-0.249298	0.269978	0.448945	0.0262877	0.225037	0.349514
SMAC_01677.3_t1	953.314	0.350313	0.562033	0.431084	0.343135	0.468541	0.212983	-0.0827314	0.887369	-0.499652	0.282517	-0.674973	0.1344	-0.41692	0.439636	-0.592242	0.211085
SMAC_01678.3_t1	175.076	0.316101	0.501633	0.630421	0.0645835	0.56597	0.0469269	0.778849	0.0101244	0.00863224	0.985192	0.149791	0.764239	-0.770217	0.0212895	-0.629058	0.0785323
SMAC_01679.3_t1	817.477	0.748936	0.128952	0.288676	0.541589	0.100741	0.813218	-0.24267	0.627563	-0.285502	0.578778	-0.197457	0.740949	-0.0428313	0.953702	0.0452136	0.948192
SMAC_01680.3_t1	496.697	0.533029	0.181162	0.195568	0.611183	3.12205	1.6966e-34	-1.84377	4.37381e-10	-1.01738	0.000877286	-1.21867	0.000131234	0.826394	0.0243546	0.625104	0.124979
SMAC_01681.3_t1	713.315	-0.232198	0.55073	-0.537842	0.0552699	0.24241	0.32659	-0.843118	0.000542178	-0.454341	0.104097	-0.756259	0.00342652	0.388777	0.219673	0.0868595	0.835867
SMAC_01682.3_t1	1476.9	-0.279955	0.575688	-0.168278	0.684547	-0.599361	0.0438196	0.398512	0.266844	0.589384	0.0928128	0.465967	0.220149	0.190872	0.704401	0.0674544	0.903161
SMAC_01683.3_t1	563.242	0.111248	0.877126	0.607326	0.152935	0.492965	0.171407	0.148975	0.777875	0.507644	0.251393	0.187156	0.749336	0.358669	0.505705	0.0381809	0.954716
SMAC_01684.3_t1	1303.35	0.331914	0.421987	0.516752	0.100766	1.09645	1.24883e-05	0.166322	0.651533	0.0248862	0.9572	0.116526	0.796379	-0.141436	0.759192	-0.0497962	0.921545
SMAC_01685.3_t1	1917.69	-0.0266817	0.958893	0.0421078	0.907815	0.747176	0.00145523	0.534446	0.0461435	0.398653	0.181063	0.0746333	0.862214	-0.135793	0.745401	-0.459813	0.127617
SMAC_01686.3_t1	9299.12	0.337608	0.366207	-0.212095	0.503272	-4.57556	8.08802e-91	-1.28225	1.00269e-07	-0.642544	0.0179322	-0.807597	0.00199749	0.639705	0.0259841	0.474652	0.115135
SMAC_01687.3_t1	1005.75	0.0770968	0.912454	0.112631	0.814737	-0.756145	0.0220309	-0.682532	0.0685005	-0.731704	0.0578834	-0.79955	0.0385674	-0.0491722	0.94059	-0.117018	0.842472
SMAC_01688.3_t1	912.559	-0.0243243	0.9674	0.143494	0.723668	0.725032	0.00994678	0.809175	0.00801128	0.174913	0.684428	0.202594	0.649802	-0.634262	0.0707813	-0.606581	0.0813762
SMAC_01689.3_t1	33.1752	-0.441691	0.668721	-0.715236	0.334334	-0.0753994	0.912844	1.38981	0.0158333	-0.557877	0.467305	-0.0671305	0.950614	-1.94769	0.00150112	-1.45694	0.0272541
SMAC_01690.3_t1	87.8848	-0.666682	0.230347	-0.33559	0.496574	-1.7146	9.04516e-06	-0.303816	0.545106	-0.528286	0.270059	-0.103029	0.87947	-0.224469	0.733906	0.200787	0.754584
SMAC_01691.3_t1	2245.86	0.148185	0.76821	0.525752	0.0981904	1.67467	1.81979e-11	0.45687	0.136508	-0.0254045	0.956612	0.140007	0.751559	-0.482274	0.160955	-0.316863	0.397407
SMAC_01692.3_t1	259.216	-1.3245	0.0606114	-0.512781	0.454919	2.17942	1.14984e-05	1.55104	0.0048731	0.740871	0.263359	0.0288713	0.976227	-0.810165	0.246096	-1.52216	0.00992678
SMAC_01693.3_t1	413.217	-0.0192955	0.972817	-0.182827	0.633267	0.326725	0.261585	0.386392	0.247716	-0.00407874	0.99356	0.163331	0.720162	-0.390471	0.314078	-0.223061	0.603864
SMAC_01694.3_t1	2706.92	0.561671	0.251359	1.10026	0.00404205	1.50669	2.31272e-06	-0.329928	0.443653	-0.479333	0.259676	-0.33553	0.483997	-0.149406	0.802837	-0.00560234	0.992606
SMAC_01695.3_t1	874.813	0.0392791	0.964411	-0.311513	0.588253	-0.761281	0.0794412	0.231244	0.70819	0.829417	0.104243	1.01433	0.0407235	0.598174	0.316029	0.783083	0.14523
SMAC_01697.3_t1	521.168	0.172303	0.780363	0.50851	0.197233	0.771934	0.0151466	0.378001	0.3462	0.515331	0.196595	0.453683	0.289134	0.13733	0.812449	0.0756822	0.900253
SMAC_01698.3_t1	1630.85	0.397735	0.296424	0.405901	0.19189	1.34632	2.4003e-08	-0.0395131	0.924631	-0.628765	0.030175	-0.909431	0.000939471	-0.589252	0.0594103	-0.869918	0.00203757
SMAC_01699.3_t1	1448.19	0.247873	0.712347	0.699426	0.109661	1.08109	0.00233068	-0.259666	0.606712	-0.59502	0.188275	-0.454231	0.360124	-0.335353	0.560821	-0.194564	0.747174
SMAC_01700.3_t1	1351.85	0.227386	0.716711	0.272711	0.540299	1.54609	1.6888e-06	0.18364	0.707296	0.222085	0.658116	0.142749	0.806242	0.0384451	0.954923	-0.0408907	0.950603
SMAC_01701.3_t1	8414.31	0.429063	0.435591	0.990032	0.0147982	0.812221	0.0183952	-0.696004	0.0772923	-1.02522	0.00692848	-0.793428	0.0515904	-0.32922	0.546519	-0.0974243	0.877415
SMAC_01702.3_t1	541.937	0.756324	0.00739607	0.30516	0.307607	1.29114	6.48241e-09	0.596097	0.0204825	0.384532	0.189601	-0.0814438	0.849879	-0.211565	0.573818	-0.677541	0.0141403
SMAC_01703.3_t1	210.891	0.0462584	0.953798	1.04562	0.0118343	1.02034	0.00330212	0.442553	0.315528	0.592508	0.177482	0.501641	0.29711	0.149955	0.814752	0.0590879	0.933834
SMAC_01704.3_t1	334.932	-0.177946	0.843478	-0.062304	0.926823	1.28192	0.0035553	0.972483	0.0528933	0.327546	0.617913	0.724863	0.210388	-0.644938	0.301734	-0.24762	0.737809
SMAC_01706.3_t1	214.913	-0.304081	0.564288	-0.311795	0.445294	0.186233	0.591749	0.196626	0.65061	0.340238	0.411174	0.00776546	0.989097	0.143612	0.793453	-0.188861	0.715663
SMAC_01707.3_t1	433.008	0.0749371	0.889114	0.302688	0.355764	-0.169525	0.558326	-0.0629686	0.879116	-0.214303	0.557359	0.189827	0.638038	-0.151335	0.73861	0.252796	0.519514
SMAC_01708.3_t1	264.785	0.315183	0.43864	0.284867	0.384551	0.450311	0.0802201	0.193206	0.579684	-0.630462	0.0333743	-0.701693	0.0238202	-0.823667	0.00541108	-0.894899	0.00285913
SMAC_01709.3_t1	456.42	0.291964	0.514284	0.217095	0.546355	1.48804	5.49141e-09	0.114062	0.780805	0.0128573	0.97846	-0.25306	0.53646	-0.101205	0.839481	-0.367123	0.342167
SMAC_01710.3_t1	1043.44	0.00199895	0.996628	0.131209	0.710562	0.462349	0.0670233	0.519061	0.0657849	0.399731	0.199365	1.04671	5.12141e-05	-0.119331	0.788055	0.527644	0.0823304
SMAC_01711.3_t1	110.084	-1.08335	0.085334	-0.629883	0.275083	1.91988	6.80121e-06	-2.779	4.18715e-08	-1.91216	0.000117325	-1.87929	0.000466347	0.866844	0.231862	0.89971	0.222001
SMAC_01712.3_t1	1062.75	0.345277	0.493185	0.496868	0.189154	-0.080757	0.827763	-0.157752	0.727791	-0.259171	0.552006	-0.111814	0.837388	-0.101419	0.860684	0.0459377	0.941038
SMAC_01713.3_t1	172.857	-0.153036	0.789686	0.0763502	0.859693	-0.164611	0.61989	0.682468	0.0312649	0.129901	0.780143	0.370385	0.358996	-0.552567	0.136667	-0.312083	0.467908
SMAC_01714.3_t1	37191	-0.00189062	0.998195	0.229447	0.718926	-0.436015	0.367072	-0.335113	0.588396	-0.83188	0.127326	-0.59896	0.322537	-0.496767	0.46549	-0.263847	0.719093
SMAC_01715.3_t1	791.653	0.153749	0.698592	0.0395809	0.903688	0.412201	0.0583479	0.463237	0.0556398	0.239603	0.409237	0.20728	0.51484	-0.223634	0.501904	-0.255958	0.409545
SMAC_01716.3_t1	250.459	0.633669	0.253249	0.459698	0.333851	-0.604494	0.121559	-0.484569	0.301534	-0.322309	0.544614	-0.837771	0.0729895	0.162261	0.814021	-0.353202	0.551846
SMAC_01717.3_t1	1852.85	-0.306435	0.442984	-0.360277	0.245904	-0.897737	0.000235748	0.751199	0.00461168	1.5347	3.50019e-10	1.08196	2.46648e-05	0.783501	0.00539511	0.33076	0.334546
SMAC_01718.3_t1	3465.13	0.530521	0.132391	0.504673	0.101096	1.15319	2.56709e-06	-0.0273469	0.947279	-0.317916	0.345457	-0.109812	0.803079	-0.290569	0.449502	-0.0824651	0.855498
SMAC_01719.3_t1	2604.43	-0.0816348	0.932436	-0.479395	0.391044	-1.35384	0.00155365	-2.00076	5.9864e-06	-1.65368	0.000308789	-2.1937	6.92404e-07	0.347079	0.631195	-0.192939	0.798177
SMAC_01720.3_t1	1607.81	-0.0436221	0.944726	-0.521648	0.131974	-0.499183	0.0844569	-1.29775	7.10974e-06	-0.808293	0.0104325	-1.30956	8.01781e-06	0.489458	0.198707	-0.0118136	0.98184
SMAC_01721.3_t1	3391.97	0.0923033	0.872411	0.397217	0.254183	0.617107	0.0277033	-0.777976	0.0103417	-0.973463	0.00111797	-0.909933	0.00291467	-0.195487	0.682294	-0.131957	0.784711
SMAC_01722.3_t1	1628.95	0.414979	0.555782	0.487772	0.363138	-5.11619	5.17493e-27	1.74117	4.961e-05	2.8899	1.73069e-12	2.95662	4.46149e-13	1.14873	0.0195297	1.21544	0.00996359
SMAC_01723.3_t1	870.833	-0.361709	0.474527	-0.478583	0.214563	0.047198	0.902644	0.282105	0.491882	0.150409	0.760493	0.205788	0.676021	-0.131696	0.814752	-0.0763162	0.89659
SMAC_01724.3_t1	2186.88	0.0929944	0.889725	-0.405881	0.319399	-0.546954	0.0971995	0.095635	0.851157	0.291506	0.51602	0.461042	0.279835	0.195871	0.726792	0.365407	0.429723
SMAC_01725.3_t1	573.664	0.206552	0.761446	-0.0686857	0.899946	0.0847074	0.845909	0.619307	0.13981	0.780675	0.0636852	1.03301	0.0101122	0.161368	0.802623	0.413706	0.421384
SMAC_01726.3_t1	470.48	0.0811292	0.903442	0.464566	0.236287	3.20583	1.32873e-28	-0.719279	0.0459559	-0.945903	0.00785484	-1.04837	0.00455892	-0.226624	0.687372	-0.329089	0.522659
SMAC_01727.3_t1	175.28	0.947293	0.0116683	0.445963	0.253362	0.582384	0.0637075	0.396186	0.302926	0.744716	0.034639	0.20033	0.698662	0.348529	0.453157	-0.195856	0.710679
SMAC_01728.3_t1	445.538	-0.0409358	0.953331	-0.288355	0.481889	-0.537652	0.0923812	-0.100693	0.837326	0.386093	0.34483	0.285848	0.534215	0.486786	0.250446	0.386541	0.381445
SMAC_01729.3_t1	181.797	0.285672	0.595307	-0.417213	0.303076	0.101727	0.782693	-0.748871	0.0355636	0.0263397	0.962668	-0.114513	0.840472	0.775211	0.0480214	0.634358	0.126685
SMAC_01730.3_t1	1137.63	-0.0299726	0.964411	-0.453304	0.265096	0.557513	0.0919942	-0.280734	0.517666	-0.0518328	0.925731	0.0612026	0.921993	0.228901	0.678094	0.341936	0.474798
SMAC_01732.3_t1	1888.88	-0.451297	0.584776	-1.43955	0.0114289	-1.78935	0.000148856	-0.407353	0.53074	-0.408436	0.550437	-0.170992	0.840864	-0.00108306	0.999098	0.23636	0.772888
SMAC_01733.3_t1	4577.83	-0.777896	0.255155	-0.367992	0.547313	1.39676	0.00208739	0.7315	0.181671	-0.00788411	0.992359	0.172848	0.831748	-0.739384	0.236834	-0.558652	0.391715
SMAC_01734.3_t1	532.949	-0.285488	0.700632	-0.916012	0.0603383	-1.12428	0.00505941	0.939618	0.0352783	0.0992675	0.887168	-0.130189	0.85659	-0.84035	0.0963607	-1.06981	0.0218336
SMAC_01735.3_t1	128.155	0.24938	0.681251	0.594649	0.140643	0.32922	0.354448	-0.00803523	0.987321	-0.338044	0.459039	-0.0100498	0.987627	-0.330009	0.537531	-0.00201458	0.997323
SMAC_01737.3_t1	638.604	-0.127792	0.804119	0.00505162	0.989214	0.479985	0.0677887	-0.194234	0.588535	-0.454664	0.156584	-0.551463	0.085547	-0.260429	0.52562	-0.357228	0.33016
SMAC_01738.3_t1	126.932	-0.327042	0.537452	0.196484	0.648097	0.312453	0.343162	0.451533	0.218224	0.137319	0.781514	-0.101974	0.859576	-0.314213	0.511341	-0.553506	0.184389
SMAC_01739.3_t1	965.11	0.187511	0.708059	0.354348	0.29756	0.52787	0.0526606	-0.00889854	0.982745	0.0520433	0.911328	0.189984	0.654041	0.0609418	0.909494	0.198882	0.639721
SMAC_01741.3_t1	205.617	-0.850127	0.00891137	-0.730893	0.0218303	-1.05936	5.02518e-05	-0.556408	0.0623968	-0.350815	0.301784	-0.0491408	0.923544	0.205593	0.645857	0.507267	0.139855
SMAC_01742.3_t1	1227.37	-0.0964052	0.84299	0.0767311	0.829472	-1.44557	7.18703e-10	-0.800906	0.00194862	-0.59778	0.0324365	-0.537453	0.0669659	0.203126	0.614895	0.263453	0.465098
SMAC_01743.3_t1	1685.39	0.46309	0.494256	-0.34255	0.533121	3.67798	1.71265e-21	0.161567	0.798389	0.128466	0.856656	0.562751	0.313337	-0.033101	0.96805	0.401183	0.518057
SMAC_01744.3_t1	631.528	-0.255812	0.555734	0.545855	0.07697	1.37822	1.30156e-08	0.619425	0.0280715	0.327969	0.327163	0.638062	0.032074	-0.291455	0.446774	0.0186372	0.970628
SMAC_01745.3_t1	652.304	-0.560052	0.368744	-1.22023	0.0100411	-1.27992	0.00122592	0.0319077	0.958122	-0.120893	0.860324	-0.525834	0.337069	-0.152801	0.836422	-0.557742	0.312287
SMAC_01746.3_t1	535.981	0.557402	0.0964713	0.8727	0.00196126	0.966768	4.8554e-05	-0.0973283	0.798213	-0.314732	0.336209	-0.153688	0.707532	-0.217404	0.593715	-0.0563601	0.906396
SMAC_01747.3_t1	334.439	0.0142914	0.979372	0.795576	0.0147216	0.0202752	0.95182	0.411069	0.216817	-0.10035	0.828282	-0.0832219	0.87057	-0.511419	0.160396	-0.494291	0.176035
SMAC_01748.3_t1	2259.73	-0.800652	0.00739607	-0.746401	0.0104548	-2.10167	5.82047e-19	1.8433	1.03842e-14	0.262951	0.432	-0.0367417	0.938208	-1.58035	1.32284e-10	-1.88004	5.67624e-15
SMAC_01749.3_t1	2527.18	-0.0938048	0.852632	-0.562536	0.062814	-1.15209	2.13378e-06	-0.120636	0.747107	1.05584	4.72498e-05	0.547038	0.0686253	1.17647	7.14618e-06	0.667674	0.0213353
SMAC_01750.3_t1	304.95	-0.621466	0.130592	-0.812039	0.021685	-1.12971	9.92283e-05	-0.867696	0.0064865	-0.967729	0.00250949	-0.805346	0.0189695	-0.100033	0.858636	0.06235	0.914518
SMAC_01751.3_t1	333.254	0.228616	0.631084	0.24587	0.491339	1.20304	2.94091e-06	0.392188	0.227439	-0.385086	0.273228	-0.164775	0.716614	-0.777273	0.0151601	-0.556963	0.107981
SMAC_01752.3_t1	202.39	0.195609	0.7481	0.124141	0.794467	2.06074	3.23982e-12	-0.0302753	0.953615	0.308983	0.480186	-0.302351	0.545503	0.339258	0.496767	-0.272076	0.603956
SMAC_01753.3_t1	8292.53	-0.790593	0.084557	-0.822464	0.0431141	-2.72733	2.14575e-17	0.760127	0.0461261	0.882484	0.021753	0.99594	0.00847605	0.122357	0.845727	0.235812	0.662225
SMAC_01754.3_t1	5345.2	-0.364646	0.414661	-1.25205	5.85466e-05	-1.33207	1.01619e-06	0.848563	0.00495757	1.32477	4.27394e-06	0.635377	0.0579846	0.476205	0.207574	-0.213186	0.625388
SMAC_01755.3_t1	2638.47	-0.225536	0.747918	-1.06876	0.0150933	-1.18078	0.00124989	0.664903	0.123985	0.864037	0.0446655	0.832837	0.0594995	0.199134	0.761743	0.167934	0.792609
SMAC_01756.3_t1	6243.49	0.287751	0.550014	0.428874	0.228437	-0.202651	0.526976	-0.221477	0.574497	0.073634	0.88166	0.0341015	0.950122	0.295111	0.510171	0.255578	0.55667
SMAC_01757.3_t1	961.839	0.304287	0.657662	0.573148	0.228485	-0.0552277	0.908015	-0.6536	0.14842	-0.625646	0.194316	-0.70605	0.144553	0.0279541	0.971424	-0.0524506	0.946073
SMAC_01758.3_t1	516.476	-0.129072	0.738092	-0.322929	0.205316	-0.640739	0.00161903	0.54098	0.0137348	0.0569647	0.870096	0.180649	0.555651	-0.484016	0.0502391	-0.360331	0.172074
SMAC_01759.3_t1	487.547	-1.21731	0.22789	-2.67025	0.000686238	-4.7771	1.48413e-12	-3.03609	1.84901e-05	-1.50691	0.0634881	0.207472	0.866068	1.52919	0.0781023	3.24356	6.30171e-06
SMAC_01760.3_t1	1151.9	0.488972	0.439849	-0.355304	0.4961	2.28698	1.2799e-09	-0.294711	0.591092	-0.14579	0.824053	-0.598706	0.252923	0.148921	0.838174	-0.303995	0.623347
SMAC_01761.3_t1	1640.61	-0.324891	0.554129	-0.480529	0.238196	-0.921303	0.00453982	-0.795902	0.0285219	-0.166971	0.746566	0.52979	0.209275	0.628931	0.138269	1.32569	0.000137264
SMAC_01762.3_t1	953.948	-0.424575	0.355187	-0.4611	0.210318	-1.06428	0.000270125	0.539772	0.115433	0.848423	0.00956843	1.22252	7.23441e-05	0.308651	0.500047	0.682753	0.0529808
SMAC_01763.3_t1	220.645	0.0968924	0.892464	0.366311	0.406021	-1.28053	0.000291466	0.611073	0.117933	1.60369	2.02774e-06	1.98409	2.14994e-09	0.992618	0.00956717	1.37302	9.3845e-05
SMAC_01764.3_t1	5941.92	0.585133	0.130868	0.310249	0.387741	-1.36976	3.69304e-07	-1.19436	3.04204e-05	-0.541957	0.108796	-0.452107	0.210437	0.652405	0.0583622	0.742254	0.0220055
SMAC_01765.3_t1	4856.45	-0.178902	0.510346	-0.208004	0.317963	-0.228418	0.182956	-0.478981	0.00690338	-0.304072	0.129465	-0.37825	0.0528099	0.174909	0.49164	0.100731	0.710258
SMAC_01766.3_t1	308.587	-0.551301	0.371871	-0.467855	0.354332	-0.108121	0.818653	-0.0501231	0.937976	-0.268588	0.645096	1.13503	0.0095109	-0.218464	0.753233	1.18515	0.00736275
SMAC_01767.3_t1	232.554	-0.866043	0.0142285	-0.0519008	0.903394	-1.06524	0.00014402	-0.727892	0.0196264	-0.69929	0.0312099	-0.782648	0.0188268	0.0286017	0.960984	-0.0547559	0.924667
SMAC_01768.3_t1	125.388	0.0280259	0.971002	0.159736	0.764592	0.411376	0.284934	0.740817	0.0693564	0.674144	0.121233	0.307165	0.584374	-0.0666731	0.925542	-0.433652	0.412081
SMAC_01769.3_t1	398.551	-0.987741	0.0189224	-0.582625	0.158776	-0.543422	0.114826	1.00261	0.0046846	-0.43743	0.317005	-0.241793	0.645795	-1.44004	4.92397e-05	-1.24441	0.000588234
SMAC_01770.3_t1	84.4367	0.0830431	0.912529	0.0784564	0.882941	0.668354	0.0539612	0.0295513	0.956515	0.529594	0.219666	0.522567	0.265597	0.500043	0.306354	0.493015	0.322958
SMAC_01771.3_t1	267.696	0.193886	0.686648	0.092182	0.811731	-0.114769	0.704657	0.0778779	0.850831	0.451808	0.156669	0.816444	0.00452486	0.37393	0.307812	0.738566	0.0144996
SMAC_01772.3_t1	3673.71	-0.609555	0.253249	-1.32216	0.00132404	-1.23719	0.000454108	0.653487	0.11802	1.35024	0.000373245	1.10406	0.00537706	0.696757	0.132987	0.45057	0.373386
SMAC_01774.3_t1	4833.64	0.0472579	0.925416	0.277607	0.342809	1.65104	3.88728e-14	-0.687652	0.00562349	-0.912065	0.000169082	-0.569633	0.0344294	-0.224414	0.539657	0.118019	0.761593
SMAC_01774.3_t2	0	NA	NA	NA	NA	NA	NA	NA	NA	NA	NA	NA	NA	NA	NA	NA	NA
SMAC_01775.3_t1	5448.86	-0.111178	0.832006	0.2632	0.441428	-1.19811	2.47535e-06	-0.136316	0.724756	0.042885	0.924009	0.105681	0.817826	0.1792	0.690611	0.241997	0.542053
SMAC_01776.3_t1	2122.05	0.127602	0.870143	-0.236439	0.655054	0.703	0.0696271	-0.823402	0.0561547	-0.408571	0.429631	-1.16749	0.00574016	0.414831	0.477667	-0.344087	0.553071
SMAC_01777.3_t1	117.078	-0.713444	0.345445	-1.16391	0.0529636	-2.54204	6.61229e-07	1.45316	0.00434896	-0.00890936	0.991643	-0.570691	0.414146	-1.46207	0.00795842	-2.02385	0.000110636
SMAC_01778.3_t1	58.1042	-0.734033	0.345445	-0.988993	0.11704	-2.3088	5.56448e-05	1.49745	0.00201518	1.3668	0.00669618	1.08392	0.0523225	-0.130653	0.878603	-0.413531	0.554077
SMAC_01779.3_t1	36.1826	-0.686799	0.507845	-0.386034	0.65431	-0.938313	0.150093	0.239331	0.794737	0.544183	0.512228	0.0321501	0.977721	0.304853	0.774024	-0.20718	0.850373
SMAC_01780.3_t1	332.073	-0.344386	0.415558	-0.54543	0.0930253	0.0244856	0.93891	-0.848888	0.00291056	-0.71059	0.0178366	0.211553	0.601619	0.138298	0.774759	1.06044	0.000257784
SMAC_01781.3_t1	1086.3	-0.152582	0.748487	0.0416651	0.912592	0.148686	0.600947	-0.228808	0.493667	-0.217233	0.540684	0.443093	0.163758	0.0115745	0.981132	0.671901	0.0217586
SMAC_01782.3_t1	211.973	-0.0177548	0.980939	-0.350339	0.489467	1.23867	0.000774985	-0.116813	0.845878	-0.13143	0.836244	-0.101633	0.884999	-0.0146173	0.984701	0.0151805	0.982516
SMAC_01783.3_t1	5318.55	-1.52732	2.80925e-08	-1.16881	5.85446e-05	1.29689	3.06124e-07	-1.21916	5.25234e-06	-1.93764	6.09425e-14	-1.62059	6.63259e-10	-0.71848	0.0218167	-0.401431	0.25666
SMAC_01784.3_t1	213.692	0.0179756	0.97229	-0.0602056	0.872592	0.397418	0.114461	0.289932	0.346934	0.640105	0.0189307	0.421874	0.18978	0.350173	0.305708	0.131942	0.754416
SMAC_01785.3_t1	355.559	0.426973	0.322481	-0.142547	0.726428	0.200379	0.523018	-0.109593	0.799698	-0.0290822	0.953505	0.179993	0.695212	0.0805105	0.881178	0.289586	0.498722
SMAC_01786.3_t1	38.6223	0.316656	0.746889	-0.227821	0.773064	-1.58633	0.00882125	1.42077	0.00727239	1.38488	0.0111833	0.974	0.127501	-0.035894	0.969601	-0.446771	0.555378
SMAC_01787.3_t1	54.1608	-1.5011	0.228103	-0.677748	0.544051	-9.20915	8.21514e-08	-1.31489	0.192619	-0.743598	0.527551	-0.806734	0.516126	0.571294	0.695468	0.508159	0.718567
SMAC_01788.3_t1	993.759	-0.24458	0.611024	-0.0560006	0.893003	0.109829	0.730693	-0.135991	0.740967	-0.211626	0.599301	0.353574	0.350562	-0.0756351	0.886934	0.489565	0.168682
SMAC_01789.3_t1	9.04103	-1.65656	0.305341	-2.04072	0.137492	-2.12497	0.0582581	0.791362	0.50096	0.239821	0.876561	0.316897	0.84887	-0.55154	0.722261	-0.474465	0.759924
SMAC_01790.3_t1	685.424	-0.0443002	0.931287	0.104839	0.754812	-0.45791	0.0528357	-0.200153	0.520159	-0.376947	0.196074	-0.399856	0.184222	-0.176793	0.652524	-0.199703	0.582234
SMAC_01791.3_t1	201.078	-0.207539	0.712857	0.0350933	0.937974	0.111338	0.746651	0.364691	0.322101	0.407466	0.285048	0.692779	0.0493781	0.0427749	0.941162	0.328088	0.45119
SMAC_01792.3_t1	0.745652	0.420156	NA	0.857011	NA	-0.47819	0.925473	0.860735	0.892613	0.111119	0.986698	-1.21051	NA	-0.749616	NA	-2.07125	0.760776
SMAC_01793.3_t1	16.1701	-1.09282	0.519051	0.0234424	0.987252	-7.26122	5.74698e-05	-2.76581	0.0230569	-1.28627	0.336418	0.0623857	0.973893	1.47954	0.365083	2.82819	0.0314378
SMAC_01794.3_t1	464.078	-0.556879	0.26593	-1.24952	0.00134854	1.04483	0.00133871	-0.171863	0.72675	0.366854	0.414781	0.260044	0.612843	0.538718	0.233896	0.431907	0.360045
SMAC_01795.3_t1	493.781	0.546762	0.196235	0.593335	0.0950594	0.91516	0.00142229	0.799499	0.0117627	1.34349	6.4291e-06	1.36895	4.78251e-06	0.543994	0.148711	0.569453	0.118578
SMAC_01796.3_t1	55.9148	-1.05731	0.219703	-1.81025	0.010518	-6.13602	1.55543e-12	-1.91895	0.00253357	-2.55637	5.00465e-05	-4.1936	1.35433e-08	-0.637423	0.512002	-2.27465	0.0072049
SMAC_01797.3_t1	754.023	0.279691	0.561755	0.580165	0.0931301	0.602705	0.036039	-0.0289186	0.950323	-0.110289	0.814872	-0.0380542	0.944541	-0.08137	0.881178	-0.00913558	0.985494
SMAC_01798.3_t1	950.977	0.211993	0.590056	0.0836765	0.804835	1.93127	1.24832e-19	-0.196257	0.524328	-0.274017	0.372039	-0.114434	0.772601	-0.0777598	0.857781	0.0818233	0.843541
SMAC_01799.3_t1	4816.26	0.0946903	0.915124	-0.512262	0.329987	-0.29006	0.531533	0.287666	0.620499	0.844838	0.0885631	0.87833	0.080446	0.557172	0.347705	0.590664	0.295887
SMAC_01800.3_t1	3400.56	-0.376164	0.58525	-0.93928	0.0524861	-0.488321	0.251812	0.1728	0.778089	0.686337	0.169773	0.499978	0.364864	0.513537	0.378357	0.327178	0.596718
SMAC_01801.3_t1	366.096	-0.105247	0.903474	-0.499261	0.342142	1.0143	0.0127093	0.0886331	0.895417	0.483517	0.376947	0.632326	0.238577	0.394884	0.542463	0.543693	0.342061
SMAC_01802.3_t1	4583.18	-0.157481	0.857881	0.225836	0.712919	-1.20739	0.00485024	-1.10259	0.0205041	-1.1776	0.0153266	-0.670819	0.234056	-0.0750041	0.930093	0.431774	0.503026
SMAC_01803.3_t1	3231.16	0.904471	0.0196401	0.0404171	0.931722	-0.863567	0.00532676	0.10061	0.838087	1.11985	0.000719167	0.392743	0.358299	1.01924	0.00395499	0.292133	0.533472
SMAC_01804.3_t1	4137.24	1.0245	0.00862694	-0.592705	0.133837	2.75046	1.22938e-19	-0.599669	0.109812	1.44945	1.31458e-05	-0.427598	0.331614	2.04912	2.48785e-10	0.172072	0.750288
SMAC_01805.3_t1	1798.18	-0.676579	0.164141	-2.03996	1.72176e-08	-1.54794	3.32318e-06	-0.614404	0.124996	-0.193882	0.716034	-1.23137	0.000861607	0.420522	0.405978	-0.616969	0.160887
SMAC_01806.3_t1	1809.63	-0.599957	0.0798668	-0.55047	0.0738173	-2.134	1.32105e-18	0.101163	0.795507	-0.536014	0.0762389	-1.45603	1.54123e-08	-0.637177	0.038337	-1.55719	1.48115e-09
SMAC_01807.3_t1	717.246	0.89293	0.06588	0.778338	0.0781001	2.77923	5.7518e-16	-0.46326	0.312948	-0.462793	0.341692	-0.602306	0.212912	0.000466651	0.999426	-0.139046	0.833232
SMAC_01808.3_t1	22979.1	-0.613193	0.363188	-1.09689	0.0345774	-4.18303	1.94576e-24	1.24799	0.00795992	1.83862	4.78439e-05	2.21714	4.77361e-07	0.59063	0.34151	0.969148	0.0652777
SMAC_01809.3_t1	1586.91	0.0488873	0.955803	0.416732	0.424255	1.42578	0.00027432	1.59725	0.000113051	-0.145646	0.827435	0.0354736	0.962592	-1.74289	4.46819e-05	-1.56177	0.000272349
SMAC_01810.3_t1	688.449	-0.754603	0.0671782	-0.949425	0.00935711	-0.0520626	0.89034	-0.494698	0.176923	-0.326778	0.434635	-0.105305	0.84881	0.167919	0.759443	0.389392	0.373751
SMAC_01811.3_t1	526.82	0.57724	0.259877	0.124404	0.807289	0.87947	0.0102574	0.923145	0.0139555	-0.186444	0.732082	-0.593398	0.187683	-1.10959	0.00476712	-1.51654	3.99712e-05
SMAC_01812.3_t1	2301.62	0.43119	0.374921	0.792547	0.0329143	1.52364	3.59194e-07	0.720572	0.0384657	0.243414	0.590259	-0.023597	0.968139	-0.477158	0.26556	-0.744169	0.0446455
SMAC_01813.3_t1	7.79189	-0.575301	0.804981	-1.01813	0.530432	0.226906	0.866382	0.795791	0.598656	0.324756	0.863422	0.353226	0.862738	-0.471035	0.812074	-0.442565	0.824169
SMAC_01814.3_t1	2477.45	-0.00612785	0.990531	-0.375976	0.219877	2.17	4.74818e-21	-0.276854	0.377827	0.131805	0.733624	0.209568	0.572841	0.40866	0.219982	0.486422	0.115746
SMAC_01815.3_t1	877.572	-1.91137	0.00112722	-2.5003	6.5285e-06	-2.84007	7.32246e-09	1.3938	0.0112964	-1.56889	0.00478693	-0.7041	0.30098	-2.96269	7.66702e-09	-2.0979	9.1815e-05
SMAC_01816.3_t1	255.311	0.167955	0.792605	0.130953	0.785688	0.300545	0.393768	1.00124	0.0035328	0.215718	0.655463	-0.10319	0.862432	-0.785518	0.0451973	-1.10443	0.00248319
SMAC_01817.3_t1	107.736	-0.269731	0.74412	-0.448313	0.435935	-1.08649	0.0155537	2.28926	3.25661e-08	-0.388024	0.522084	-1.18024	0.0322885	-2.67729	3.09495e-10	-3.46951	3.25234e-14
SMAC_01818.3_t1	602.688	-0.108718	0.878959	-1.37466	0.000508002	-4.00701	7.4543e-29	1.78474	1.92695e-07	-1.35493	0.00020836	-1.44763	9.16423e-05	-3.13967	7.57356e-21	-3.23237	1.25443e-21
SMAC_01819.3_t1	113.915	-0.57706	0.345445	-0.0191791	0.972507	0.945516	0.0112074	1.19018	0.00263612	0.58698	0.215387	0.556546	0.277931	-0.603201	0.229865	-0.633635	0.202235
SMAC_01820.3_t1	1510.76	-0.915334	0.314717	0.823493	0.268554	-6.13301	7.48008e-24	1.7719	0.00555491	-0.851998	0.267192	-0.0139061	0.989389	-2.6239	3.27828e-05	-1.7858	0.00772234
SMAC_01821.3_t1	342.742	0.350399	0.376441	0.482705	0.116936	0.286824	0.286694	0.301928	0.3408	0.375109	0.24243	0.542485	0.07964	0.0731808	0.879066	0.240557	0.532678
SMAC_01822.3_t1	1218.67	-0.752491	0.0436183	-0.636856	0.0660407	-1.31179	2.44524e-06	-0.739687	0.0190555	-0.726969	0.0263265	-1.52621	1.87431e-07	0.0127174	0.981868	-0.786524	0.0192272
SMAC_01823.3_t1	2279.85	-0.0635842	0.873501	-0.0610946	0.829668	-0.422022	0.030609	-0.714779	0.00041714	-0.406248	0.0777523	-0.56292	0.00998208	0.308531	0.244727	0.151859	0.616929
SMAC_01824.3_t1	2276.93	-0.575517	0.155573	-0.907946	0.00715735	1.16148	3.1316e-05	-1.57978	4.13765e-08	-1.58043	4.95101e-08	-1.63452	1.8879e-08	-0.000658745	0.999098	-0.0547445	0.922975
SMAC_01825.3_t1	1390.62	0.134301	0.747918	0.335941	0.219402	0.535499	0.0149083	-0.0808999	0.812898	-0.180282	0.567847	-0.0434878	0.919187	-0.0993823	0.803662	0.037412	0.932449
SMAC_01826.3_t1	674.129	-0.252103	0.544532	0.102481	0.777492	0.00036454	0.999113	0.0379896	0.925863	-0.0163543	0.968299	0.014742	0.974829	-0.0543439	0.912162	-0.0232476	0.961885
SMAC_01827.3_t1	94.8225	-1.04225	0.0736918	-0.841094	0.110146	-0.706527	0.108258	-1.04169	0.0296384	-0.807178	0.12039	-0.580161	0.326798	0.234515	0.762864	0.461532	0.486088
SMAC_01828.3_t1	1943.48	0.288508	0.613336	0.474452	0.246568	1.66847	1.22961e-07	-0.974913	0.00600466	-0.537674	0.192853	-0.63591	0.120158	0.437239	0.35738	0.339003	0.491062
SMAC_01829.3_t1	1273.65	0.150859	0.739185	0.0972017	0.783498	-3.48166	1.06074e-46	0.887447	0.000377207	0.189445	0.585811	-0.0403414	0.93024	-0.698002	0.012579	-0.927788	0.000327224
SMAC_01830.3_t1	474.742	0.468323	0.257555	0.543498	0.107803	2.45435	1.01272e-21	0.0290206	0.948992	0.0358192	0.940474	0.132918	0.784219	0.00679859	0.989234	0.103897	0.83579
SMAC_01831.3_t1	2180.77	-0.210273	0.639874	0.490907	0.111893	1.12734	4.34268e-06	-0.635349	0.0240146	-0.846957	0.00207978	-0.361644	0.288209	-0.211608	0.616215	0.273706	0.465693
SMAC_01832.3_t1	93.7923	-0.091353	0.919353	1.0502	0.0295327	-0.8579	0.0467663	-0.395454	0.468984	-0.0315644	0.965088	0.402475	0.508618	0.363889	0.59482	0.797928	0.138835
SMAC_01833.3_t1	17.0716	-1.23445	0.315914	-0.214983	0.834198	0.786238	0.241104	2.41099	8.98924e-05	0.677586	0.429631	-1.40846	0.239621	-1.7334	0.0111993	-3.81944	4.14177e-05
SMAC_01834.3_t1	48.3483	-0.411499	0.626344	0.187596	0.785882	1.48928	0.000705142	-0.551338	0.362498	-0.853621	0.151325	-1.10232	0.0905682	-0.302283	0.730822	-0.550984	0.503843
SMAC_01835.3_t1	1067.74	0.0550892	0.928808	-0.241185	0.512747	-0.123848	0.698461	-0.195541	0.615059	0.272569	0.475158	0.212273	0.621391	0.468109	0.210267	0.407813	0.28087
SMAC_01836.3_t1	1356.42	0.262477	0.437801	-0.0956564	0.754812	-0.905589	1.17727e-05	0.626003	0.00564488	0.168034	0.581242	-0.139229	0.681547	-0.457969	0.0821532	-0.765232	0.000920963
SMAC_01837.3_t1	705.012	0.203898	0.588433	0.168001	0.569325	-0.247063	0.292815	0.2878	0.286787	-0.206532	0.498645	-0.058104	0.885811	-0.494332	0.0702803	-0.345904	0.241291
SMAC_01838.3_t1	232.142	0.270353	0.688382	0.81384	0.0632095	2.22415	6.0423e-11	1.00307	0.0103609	0.970472	0.0166226	0.715018	0.115475	-0.0325999	0.963038	-0.288054	0.610662
SMAC_01839.3_t1	7390.51	-0.238202	0.567855	-0.194149	0.553955	-0.377741	0.138204	0.399983	0.170617	0.992599	0.000114547	0.439093	0.1567	0.592615	0.0487216	0.0391093	0.935598
SMAC_01839.3_t2	0	NA	NA	NA	NA	NA	NA	NA	NA	NA	NA	NA	NA	NA	NA	NA	NA
SMAC_01840.3_t1	1040.01	-0.2709	0.664868	-0.833465	0.046343	0.276023	0.471025	-0.107581	0.845121	-0.562713	0.196623	-0.306018	0.555272	-0.455132	0.364725	-0.198437	0.73045
SMAC_01841.3_t1	472.436	1.16875	0.024289	0.654059	0.200982	0.0912752	0.856145	0.806501	0.0895966	1.28289	0.00439285	0.557019	0.322876	0.476388	0.440122	-0.249482	0.714256
SMAC_01842.3_t1	287.995	1.3232	1.45148e-05	0.246614	0.517665	0.956279	0.000531047	-0.0370409	0.937548	1.41886	5.25462e-07	0.572065	0.106803	1.4559	6.2722e-07	0.609105	0.0916174
SMAC_01843.3_t1	2020.58	0.592736	0.129012	0.390459	0.268262	1.42745	1.25878e-07	0.523735	0.108052	-0.27075	0.487235	-0.297471	0.465808	-0.794485	0.0165759	-0.821207	0.0106862
SMAC_01844.3_t1	1408.97	0.254426	0.458091	0.593706	0.0181535	0.965068	2.27357e-06	0.476535	0.0449908	-0.148187	0.63935	0.282362	0.330039	-0.624722	0.011632	-0.194173	0.548295
SMAC_01845.3_t1	1774.55	1.39173	0.000261503	0.862202	0.0334702	-0.478294	0.17826	-0.240343	0.613468	-0.930308	0.015135	-1.58319	7.72284e-06	-0.689965	0.113358	-1.34285	0.000267385
SMAC_01846.3_t1	296.611	0.0677261	0.922697	0.418418	0.29447	0.75283	0.0164798	-0.131185	0.785874	-0.238799	0.606176	0.127721	0.819747	-0.107614	0.857781	0.258906	0.60379
SMAC_01847.3_t1	2385.57	-0.103192	0.839793	0.239282	0.473587	0.613982	0.0157528	-0.424308	0.158585	-0.688669	0.0164264	-0.307774	0.383553	-0.26436	0.506651	0.116535	0.791811
SMAC_01848.3_t1	681.774	0.599915	0.235878	0.155239	0.756162	0.955872	0.00499133	0.717102	0.0668901	0.91697	0.0178366	0.494493	0.282305	0.199868	0.739216	-0.222609	0.692374
SMAC_01849.3_t1	3203.21	1.32506	0.00290272	0.0923964	0.86975	-2.4678	1.30586e-11	1.01902	0.0137348	1.79933	3.35195e-06	0.476257	0.359519	0.780306	0.103941	-0.542764	0.292767
SMAC_01850.3_t1	821.821	0.268989	0.536171	-0.209981	0.545138	-0.539994	0.0412512	-0.100092	0.80201	0.0456387	0.91959	-0.500013	0.12739	0.145731	0.750542	-0.39992	0.258457
SMAC_01851.3_t1	187.859	0.908701	0.199371	0.0185085	0.980303	0.603591	0.244986	0.0988066	0.902216	0.242561	0.756609	-0.13809	0.878252	0.143754	0.878703	-0.236896	0.783968
SMAC_01852.3_t1	4980.9	0.0708924	0.93674	0.483768	0.342142	-1.14669	0.00392637	0.236155	0.682866	0.0820485	0.906383	0.454488	0.421096	-0.154106	0.835154	0.218334	0.742984
SMAC_01854.3_t1	459.232	-0.268571	0.646867	0.0688581	0.889587	-0.25769	0.479277	0.504077	0.197014	0.756501	0.0456704	0.813276	0.0326311	0.252424	0.64365	0.309198	0.529763
SMAC_01856.3_t1	125.306	-0.637838	0.235381	-0.204891	0.685579	0.207228	0.599197	1.23042	0.000536061	0.827455	0.0352434	0.62993	0.155096	-0.402963	0.419985	-0.600488	0.179982
SMAC_01857.3_t1	50.5464	-0.829561	0.272361	-0.448611	0.489467	0.00668677	0.990561	1.19859	0.0159695	0.646465	0.275362	0.519256	0.446417	-0.552127	0.406234	-0.679336	0.288403
SMAC_01858.3_t1	164.268	-0.109947	0.902938	-0.207365	0.737053	0.929133	0.0272405	1.16507	0.0100857	0.632816	0.235683	0.632699	0.258905	-0.532251	0.376709	-0.532368	0.37136
SMAC_01859.3_t1	585.618	-0.295929	0.595851	-0.474089	0.242015	-0.158687	0.668851	-0.172866	0.715719	0.0173981	0.975105	0.45323	0.29593	0.190264	0.737414	0.626096	0.125569
SMAC_01860.3_t1	4107.93	0.014186	0.980414	0.539075	0.138961	0.727269	0.0145346	0.561063	0.103385	-0.225917	0.603551	-0.143743	0.778006	-0.78698	0.0269269	-0.704806	0.0470212
SMAC_01861.3_t1	1179.8	-0.399651	0.264166	-0.557584	0.0545917	-1.10021	2.50506e-06	-0.412285	0.144	-0.272953	0.399949	-0.160822	0.673459	0.139332	0.740779	0.251463	0.482083
SMAC_01862.3_t1	766.612	-0.196482	0.741634	-0.586215	0.130581	-0.0843674	0.824149	-0.0232186	0.962164	0.184672	0.703148	0.510884	0.210388	0.207891	0.701435	0.534103	0.192893
SMAC_01863.3_t1	333.129	-0.239919	0.71484	0.650697	0.125502	-1.77197	3.9388e-07	-1.22523	0.00108468	0.250548	0.62624	0.967901	0.014134	1.47577	0.000120424	2.19313	7.71967e-10
SMAC_01864.3_t1	486.859	0.147979	0.827307	1.21194	0.0017671	1.25871	0.000132855	-1.22749	0.000699688	-1.14173	0.00211297	-1.14471	0.00283739	0.0857641	0.899904	0.082782	0.902633
SMAC_01865.3_t1	1479.62	0.491021	0.479297	1.28977	0.00981833	2.08918	3.26856e-07	-2.43146	1.39074e-08	-1.90202	1.76359e-05	-2.2067	5.38149e-07	0.529437	0.408769	0.224765	0.760839
SMAC_01866.3_t1	94.5052	-0.00751019	0.993577	0.795304	0.109661	0.422265	0.338122	-0.865074	0.0752187	-0.882627	0.0800079	-0.0028083	0.996738	-0.0175536	0.983763	0.862265	0.118009
SMAC_01867.3_t1	228.504	-0.9576	0.203021	-1.45174	0.0195421	-0.430618	0.448159	-0.54318	0.414589	-0.490438	0.492762	0.10814	0.913897	0.052742	0.960121	0.65132	0.373633
SMAC_01868.3_t1	209.975	-0.37453	0.577348	-0.253014	0.64233	0.278963	0.519866	1.1122	0.0075015	-0.115818	0.86273	0.0354489	0.962184	-1.22802	0.00556421	-1.07675	0.0172424
SMAC_01869.3_t1	949.534	-0.454633	0.42865	-0.59346	0.179729	0.14692	0.721872	-0.120965	0.830224	-0.78764	0.063003	-0.391698	0.445926	-0.666674	0.156704	-0.270732	0.629437
SMAC_01870.3_t1	595.063	-0.06729	0.896906	0.150621	0.663183	0.808033	0.000775027	0.537155	0.0522408	-0.359399	0.257923	-0.266248	0.461501	-0.896554	0.00110758	-0.803402	0.00412258
SMAC_01871.3_t1	1557.38	-0.434652	0.407079	-0.621248	0.123781	-1.50457	2.8141e-06	0.195484	0.680731	0.36697	0.412096	0.235797	0.648649	0.171486	0.770242	0.0403129	0.950366
SMAC_01871.3_t2	0	NA	NA	NA	NA	NA	NA	NA	NA	NA	NA	NA	NA	NA	NA	NA	NA
SMAC_01872.3_t1	834.035	-0.0954894	0.844506	0.384088	0.198447	0.212014	0.422317	-0.303966	0.314355	-0.650983	0.0174525	0.0660239	0.87975	-0.347017	0.313923	0.36999	0.258601
SMAC_01873.3_t1	1838.95	0.194547	0.664632	-0.354059	0.257211	0.569315	0.0225958	-0.118293	0.751	-0.222848	0.524286	-0.140095	0.735713	-0.104554	0.818341	-0.0218018	0.963883
SMAC_01874.3_t1	89.4629	0.14625	0.878862	0.732014	0.194589	1.02649	0.0239454	-1.05243	0.051257	-0.482334	0.446993	0.580272	0.3618	0.570092	0.435107	1.6327	0.00229787
SMAC_01875.3_t1	328.772	1.59739	3.09148e-06	-0.00629515	0.989214	-0.125045	0.740002	-0.726999	0.0499284	1.24183	0.000218143	0.100756	0.863676	1.96883	2.23877e-09	0.827755	0.0365934
SMAC_01876.3_t1	2349.35	-0.416143	0.366776	-1.05762	0.00196449	-1.25182	1.45093e-05	-0.263799	0.505464	0.0892856	0.860937	-0.0814472	0.878931	0.353084	0.42432	0.182352	0.708734
SMAC_01877.3_t1	738.273	0.15691	0.734221	-0.162171	0.634668	1.28121	4.29688e-08	-0.127537	0.724903	-0.255587	0.445831	-0.156654	0.696118	-0.12805	0.771169	-0.0291174	0.952105
SMAC_01878.3_t1	2419.62	-0.135491	0.782364	-0.197484	0.561472	0.0302584	0.924159	0.485917	0.09649	0.247049	0.479686	0.0831806	0.854759	-0.238868	0.553259	-0.402737	0.229805
SMAC_01878.3_t2	0	NA	NA	NA	NA	NA	NA	NA	NA	NA	NA	NA	NA	NA	NA	NA	NA
SMAC_01879.3_t1	8380.19	0.148531	0.802648	0.400424	0.290285	0.636698	0.035779	-0.73223	0.0283735	-0.839695	0.0124808	-0.751479	0.0313242	-0.107465	0.847853	-0.0192489	0.974265
SMAC_01880.3_t1	1473.49	0.21351	0.620862	0.516528	0.0836785	-0.320695	0.218878	-0.540634	0.0537061	-0.342368	0.286531	0.063948	0.887761	0.198266	0.631297	0.604582	0.0403888
SMAC_01881.3_t1	790.055	0.520161	0.325904	-0.393965	0.377	0.0354355	0.932667	-0.458954	0.28445	0.37639	0.422664	0.144582	0.81016	0.835344	0.0490227	0.603536	0.179492
SMAC_01882.3_t1	590.21	-0.350879	0.37661	-0.860413	0.00396984	-0.333683	0.20864	1.33741	7.08064e-08	0.52548	0.0765542	0.183643	0.642696	-0.811931	0.00397805	-1.15377	1.09307e-05
SMAC_01883.3_t1	1649.77	-0.446612	0.255355	-0.866653	0.00498402	-0.411112	0.132095	-0.228528	0.518231	-0.130509	0.756593	-0.149752	0.732649	0.0980189	0.840811	0.0787761	0.869419
SMAC_01884.3_t1	254.225	0.0399748	0.954058	0.24236	0.561051	0.577388	0.0653126	0.888602	0.00715967	0.195972	0.674247	0.438105	0.296322	-0.69263	0.0693769	-0.450498	0.287889
SMAC_01885.3_t1	17.8854	-1.25603	0.205944	-0.513416	0.548295	-1.57211	0.023933	0.274636	0.762417	-1.03946	0.200161	0.315467	0.767229	-1.31409	0.113594	0.040831	0.973876
SMAC_01886.3_t1	6176.53	-0.240953	0.331312	-0.231223	0.252033	-1.93726	2.65342e-37	-0.891117	3.23848e-08	-0.792886	1.47019e-06	-0.759598	4.82374e-06	0.0982308	0.729252	0.131519	0.599016
SMAC_01887.3_t1	903.018	0.170221	0.720884	-0.0259663	0.946175	0.0411077	0.895568	-0.420225	0.163961	-0.258622	0.457155	-0.4338	0.187683	0.161604	0.716814	-0.0135741	0.978606
SMAC_01888.3_t1	1946.14	-0.270885	0.301327	-0.0265726	0.918791	-0.0371004	0.859131	-0.830897	2.17779e-06	-0.667119	0.000246919	-0.509313	0.00890868	0.163778	0.554797	0.321585	0.149892
SMAC_01889.3_t1	651.706	0.0439197	0.943048	-0.539952	0.109746	-0.0295633	0.931614	-0.395519	0.239746	-0.184653	0.653639	-0.432867	0.234681	0.210867	0.651219	-0.0373472	0.946352
SMAC_01890.3_t1	1102.33	-0.051937	0.916909	-0.0420006	0.904908	-0.0134676	0.961745	0.0183103	0.958234	-0.0211591	0.959397	0.154612	0.674274	-0.0394695	0.93059	0.136301	0.72133
SMAC_01891.3_t1	3778.03	0.381481	0.58914	0.98068	0.0471478	1.59231	7.08567e-05	0.782895	0.0997293	0.12354	0.861482	0.550817	0.323559	-0.659355	0.238841	-0.232077	0.732803
SMAC_01892.3_t1	2822.16	0.366586	0.23618	0.129598	0.659111	0.628623	0.00246406	-0.00350032	0.991288	-0.0374609	0.918622	-0.0564797	0.881579	-0.0339606	0.935499	-0.0529794	0.894112
SMAC_01894.3_t1	673.735	0.540216	0.382855	0.674307	0.164372	0.463743	0.26828	-0.397947	0.439721	-0.0154347	0.981272	-0.258402	0.68355	0.382512	0.542066	0.139545	0.843541
SMAC_01895.3_t1	406.353	-0.103047	0.924371	-0.77562	0.204411	-0.781265	0.124635	0.254289	0.725091	0.492431	0.463018	0.406728	0.584494	0.238142	0.786855	0.152439	0.863058
SMAC_01896.3_t1	3194.02	0.271235	0.721862	0.345841	0.520607	-0.835943	0.0426573	0.625642	0.199449	0.76878	0.120559	0.387309	0.516193	0.143138	0.85062	-0.238332	0.721231
SMAC_01896.3_t2	0	NA	NA	NA	NA	NA	NA	NA	NA	NA	NA	NA	NA	NA	NA	NA	NA
SMAC_01897.3_t1	578.946	0.314772	0.551837	0.231834	0.587577	1.30393	1.69533e-05	0.801812	0.0198796	0.371746	0.376312	-0.162145	0.76519	-0.430066	0.334606	-0.963957	0.00720394
SMAC_01898.3_t1	11193.5	-0.413115	0.516694	0.342085	0.498864	0.432437	0.292288	0.58177	0.208697	-0.351224	0.514187	-0.301657	0.608735	-0.932994	0.0469632	-0.883427	0.0555775
SMAC_01899.3_t1	2283.23	-0.0933581	0.81855	0.231015	0.37827	0.753457	0.000152287	-0.388406	0.100653	-0.570494	0.0126679	-0.300129	0.270879	-0.182088	0.584777	0.0882764	0.804896
SMAC_01900.3_t1	241.072	0.276006	0.631179	0.557399	0.164181	1.74072	1.40451e-08	0.326335	0.440069	-0.222993	0.647222	-0.130076	0.826317	-0.549329	0.214987	-0.456412	0.32761
SMAC_01901.3_t1	1380.21	0.239006	0.677998	0.615908	0.10797	1.3255	1.43025e-05	-0.225171	0.610967	-0.350653	0.412986	0.224586	0.651042	-0.125482	0.828943	0.449757	0.299467
SMAC_01902.3_t1	592.866	0.404062	0.491052	0.621859	0.155924	1.02563	0.00355952	0.207415	0.687084	0.186443	0.740992	0.0864955	0.896286	-0.0209716	0.977457	-0.120919	0.849343
SMAC_01903.3_t1	211.341	0.146178	0.835717	0.319031	0.491903	1.00488	0.00347118	0.114062	0.837361	0.353483	0.459039	-0.368081	0.484103	0.239421	0.691357	-0.482143	0.34317
SMAC_01904.3_t1	302.605	-0.265038	0.602441	0.409882	0.259821	0.578611	0.0486116	-0.589217	0.0806856	-0.504867	0.164664	-0.48298	0.213797	0.0843502	0.881558	0.106237	0.843541
SMAC_01905.3_t1	175.496	0.00885351	0.989708	-0.00839005	0.985835	0.11001	0.767669	0.13987	0.769745	-0.149787	0.768291	-0.130708	0.818476	-0.289657	0.572237	-0.270578	0.591585
SMAC_01906.3_t1	1704.25	0.35216	0.458731	0.574555	0.107952	1.50595	9.72377e-08	-0.453479	0.19961	-0.62684	0.0734926	-0.476633	0.214321	-0.173361	0.737883	-0.0231538	0.967954
SMAC_01907.3_t1	801.404	-0.418412	0.560149	-1.2192	0.0158259	-0.617169	0.164181	-1.83891	2.7387e-05	-2.09403	1.59854e-06	-2.8334	4.18654e-11	-0.255114	0.734725	-0.994491	0.0587417
SMAC_01908.3_t1	54.2982	-0.92631	0.345445	-0.208854	0.821699	-4.60802	7.74098e-09	-1.16492	0.116267	-1.85365	0.0101372	-0.293298	0.789219	-0.688735	0.503346	0.871619	0.333605
SMAC_01909.3_t1	10337.9	-0.299081	0.670577	0.322804	0.53	0.734162	0.0630339	0.720822	0.109221	-0.259927	0.654011	-0.418627	0.450701	-0.980749	0.0361926	-1.13945	0.0095337
SMAC_01910.3_t1	628.148	0.580926	0.118064	0.0849849	0.830301	0.915174	0.000507068	-0.559862	0.0713481	-0.0610639	0.898499	-0.895988	0.00325587	0.498798	0.164116	-0.336126	0.400545
SMAC_01911.3_t1	12617.6	0.383266	0.332202	0.114285	0.759624	0.602903	0.0195629	-0.301253	0.355189	0.379902	0.249467	0.0413297	0.933314	0.681155	0.0267372	0.342582	0.338264
SMAC_01913.3_t1	287.766	-0.714727	0.306274	-1.36384	0.012729	-1.578	0.000507068	-0.827144	0.1226	-0.756811	0.188275	-0.829288	0.154317	0.0703337	0.939421	-0.00214399	0.997715
SMAC_01914.3_t1	1211.12	-0.547551	0.384329	-0.736682	0.133296	-0.313067	0.480752	0.104172	0.871735	-0.162376	0.806507	0.0393667	0.959134	-0.266549	0.698883	-0.0648054	0.934866
SMAC_01915.3_t1	1880.5	0.450992	0.444324	0.772706	0.0813658	1.02281	0.00492239	0.200665	0.708188	-0.2476	0.650981	-0.173387	0.78308	-0.448265	0.408482	-0.374052	0.493991
SMAC_01917.3_t1	2347.7	0.931759	0.000170468	0.368393	0.177559	-0.263565	0.265182	-0.484758	0.0544436	0.00483068	0.990137	-0.353085	0.224587	0.489589	0.0789998	0.131673	0.721231
SMAC_01918.3_t1	141.535	0.0766794	0.916073	0.300576	0.4983	0.659583	0.0497521	0.614482	0.109347	0.702429	0.0723006	0.0716683	0.914313	0.0879468	0.889502	-0.542814	0.236808
SMAC_01919.3_t1	4041.31	0.419998	0.363959	0.740454	0.0376919	0.581095	0.0549718	-0.597138	0.0812619	-0.435306	0.25606	-0.278154	0.527682	0.161832	0.75995	0.318984	0.466861
SMAC_01920.3_t1	1568.96	-0.0590082	0.89423	-0.367582	0.158134	-0.919025	8.05393e-06	-0.384368	0.118151	-0.053728	0.882779	-0.0090662	0.982073	0.33064	0.254361	0.375302	0.168481
SMAC_01921.3_t1	10066.2	-0.183094	0.751941	0.273204	0.496268	1.10822	0.00020231	0.809093	0.0154565	-0.416688	0.294376	-0.552376	0.14985	-1.22578	0.000214585	-1.36147	1.99996e-05
SMAC_01922.3_t1	1755.31	-0.417448	0.26335	-0.385021	0.215235	-0.758269	0.00222473	0.164225	0.641977	-0.145974	0.705337	-0.101853	0.816028	-0.310199	0.398523	-0.266078	0.470771
SMAC_01923.3_t1	2863.39	0.565394	0.288051	0.358377	0.436529	0.20159	0.61486	1.1813	0.00154808	1.7503	1.05056e-06	1.66752	3.86456e-06	0.568997	0.233963	0.486223	0.315087
SMAC_01924.3_t1	2266.97	0.730335	0.0691352	1.09775	0.00142413	1.34141	4.08074e-06	-0.211382	0.61689	-0.0650923	0.902209	-0.0773107	0.888556	0.14629	0.787364	0.134071	0.797897
SMAC_01925.3_t1	241.771	-0.178389	0.73856	-0.375262	0.299991	-0.0634329	0.852477	0.830915	0.00500883	0.101136	0.827435	0.0924766	0.856579	-0.729779	0.0276883	-0.738438	0.0257789
SMAC_01926.3_t1	463.705	-0.430433	0.510182	-0.376187	0.467203	0.0964495	0.840075	-0.139393	0.819763	-0.0805294	0.906334	0.404227	0.477299	0.0588638	0.94059	0.54362	0.316334
SMAC_01927.3_t1	238.554	0.873525	0.397272	-0.282885	0.767053	-0.124459	0.876068	-1.69954	0.0194742	-0.467543	0.63003	-1.25574	0.128205	1.23199	0.155434	0.443797	0.682637
SMAC_01928.3_t1	94.9397	0.016575	0.980396	0.13483	0.790621	2.05012	1.56843e-11	0.0528014	0.925338	0.620474	0.121712	0.318785	0.54201	0.567672	0.210267	0.265984	0.636311
SMAC_01929.3_t1	285.96	-0.00324567	0.996537	-0.0820216	0.889896	2.9766	9.80749e-17	0.198969	0.72755	0.443852	0.392514	-0.134991	0.849364	0.244883	0.716111	-0.33396	0.586333
SMAC_01930.3_t1	2559.76	0.367834	0.441936	0.75557	0.0337079	0.621117	0.0392287	-0.453959	0.205555	-0.556748	0.12664	-0.6327	0.0817279	-0.102789	0.854311	-0.178741	0.716743
SMAC_01931.3_t1	596.2	-0.907165	0.162832	-1.16076	0.0346798	-0.955318	0.0396489	-0.265448	0.688326	-0.541438	0.377958	-0.0722373	0.934847	-0.27599	0.730822	0.193211	0.808523
SMAC_01932.3_t1	492.047	-0.22359	0.794535	0.12627	0.843634	0.490045	0.291552	-0.417072	0.467372	0.230498	0.737368	0.62511	0.281247	0.64757	0.288641	1.04218	0.0452025
SMAC_01933.3_t1	47.2263	0.848493	0.154368	-0.748735	0.209944	1.40723	0.000465796	1.34529	0.00197999	0.414525	0.477408	0.078781	0.929135	-0.930765	0.0669129	-1.26651	0.014663
SMAC_01934.3_t1	215.688	-1.08094	0.00860262	-0.77601	0.0564078	-1.2035	0.000286053	-0.463958	0.256521	-1.10019	0.00257745	-1.03384	0.0068602	-0.636233	0.151558	-0.569886	0.209819
SMAC_01935.3_t1	1028.44	-0.858772	0.0603146	-1.03781	0.0109427	0.306262	0.415	-0.167156	0.744868	-0.283074	0.564059	0.387552	0.425481	-0.115917	0.858038	0.554708	0.220343
SMAC_01936.3_t1	354.97	-0.20654	0.77519	0.691402	0.12978	1.17031	0.00139288	-0.23713	0.656899	-0.778979	0.0840404	0.221452	0.720162	-0.541848	0.31099	0.458582	0.395026
SMAC_01937.3_t1	413.196	-0.201981	0.720884	0.262498	0.50837	-0.632243	0.0387584	-0.97956	0.00245358	-0.948899	0.00419738	-0.314186	0.4747	0.0306604	0.960784	0.665374	0.0784261
SMAC_01938.3_t1	1175.08	0.243077	0.42575	0.631769	0.00434047	0.329765	0.0913844	0.537687	0.00906418	0.6392	0.00176418	0.648926	0.00177055	0.101512	0.762864	0.111238	0.723747
SMAC_01939.3_t1	1622.81	-0.109081	0.857626	0.0647133	0.884869	-0.140391	0.682616	0.419568	0.24888	-0.29687	0.468425	-0.425344	0.28664	-0.716438	0.0496119	-0.844912	0.0136465
SMAC_01940.3_t1	454.985	0.479128	0.282215	0.663539	0.0629057	1.07193	0.000192937	0.186176	0.65864	-0.0726782	0.888031	-0.110951	0.835035	-0.258854	0.59375	-0.297127	0.512046
SMAC_01941.3_t1	16160.6	0.509139	0.50912	-0.413515	0.500144	-2.60317	5.94837e-09	-0.197665	0.780679	0.785795	0.177005	-0.446308	0.51428	0.98346	0.0945742	-0.248642	0.748703
SMAC_01942.3_t1	819.689	0.0550796	0.936158	0.0296229	0.949135	3.12382	1.69409e-28	-0.695372	0.044502	-0.108783	0.830781	-0.843304	0.0190683	0.58659	0.144799	-0.147931	0.787685
SMAC_01943.3_t1	946.163	0.64373	0.0361519	0.68367	0.015553	0.919298	7.50901e-05	0.27422	0.366532	-0.0400531	0.923133	-0.544494	0.0625452	-0.314273	0.364542	-0.818714	0.00244702
SMAC_01944.3_t1	10118.9	0.0209111	0.975378	0.555243	0.178091	0.542214	0.116775	-0.145397	0.776627	-0.618485	0.132293	-0.513185	0.242855	-0.473088	0.318785	-0.367788	0.45119
SMAC_01945.3_t1	1288.97	-0.554362	0.208004	-0.590137	0.109661	-0.799763	0.00809408	-0.630717	0.0681006	-0.666413	0.0621482	-0.245667	0.594221	-0.0356966	0.954178	0.38505	0.370169
SMAC_01946.3_t1	165.747	0.388475	0.518813	0.310139	0.520379	0.98327	0.0055739	1.25857	0.000750279	0.403724	0.407637	-0.217134	0.727837	-0.854844	0.0495747	-1.4757	0.000215243
SMAC_01947.3_t1	410.299	-0.798874	0.0714979	0.211878	0.639716	0.317929	0.367296	0.571462	0.132875	-0.367818	0.407391	-0.427628	0.345983	-0.939279	0.0144703	-0.99909	0.00763919
SMAC_01948.3_t1	730.918	-0.663667	0.304999	-1.02465	0.0456401	-0.548207	0.22115	-0.390775	0.488362	-0.281612	0.658272	-0.0372203	0.962635	0.109162	0.894447	0.353554	0.589137
SMAC_01949.3_t1	534.302	-0.119542	0.825953	-0.246011	0.494182	0.424948	0.12762	0.135555	0.735442	-0.0033386	0.994662	-0.391674	0.287186	-0.138894	0.773771	-0.527229	0.131331
SMAC_01950.3_t1	1768.92	-0.242402	0.616926	0.0515257	0.902743	-0.911112	0.000895079	-0.634164	0.0425006	0.0700834	0.884407	0.302269	0.446467	0.704247	0.0362098	0.936433	0.00232613
SMAC_01951.3_t1	141.561	0.222146	0.836422	0.689283	0.3104	0.762049	0.171343	0.329498	0.667489	0.139005	0.880473	0.0985012	0.925474	-0.190493	0.849472	-0.230997	0.806849
SMAC_01952.3_t1	2121.19	0.212481	0.573629	-0.345749	0.209011	0.0507986	0.850588	-1.58908	3.16373e-13	-1.60695	2.21173e-13	-1.37264	8.255e-10	-0.0178653	0.968213	0.216441	0.525391
SMAC_01953.3_t1	3606.67	1.1867	0.000239927	1.16893	0.000292026	1.02965	0.000257561	-0.986798	0.00121346	-0.515969	0.146311	-0.761745	0.0219461	0.47083	0.231175	0.225053	0.617259
SMAC_01954.3_t1	1282.53	0.479921	0.274352	0.841211	0.0152621	-0.569803	0.0571325	-0.502812	0.146486	-0.307068	0.443399	-0.139694	0.781732	0.195744	0.699302	0.363117	0.386579
SMAC_01955.3_t1	979.723	-0.102672	0.80424	-0.412302	0.106127	-0.821602	6.08528e-05	-0.761777	0.000533143	-0.254149	0.361332	-0.352962	0.192422	0.507628	0.0490227	0.408816	0.12793
SMAC_01956.3_t1	1336.93	-0.290281	0.547405	-0.603426	0.0833964	-0.234676	0.459268	0.0895666	0.844158	-0.0830404	0.866681	-0.0800292	0.877765	-0.172607	0.731284	-0.169596	0.720001
SMAC_01957.3_t1	2063.31	0.0341068	0.965917	0.892113	0.0540773	0.989096	0.00989749	0.619256	0.175924	0.181913	0.768628	0.138358	0.839408	-0.437344	0.452725	-0.480899	0.376457
SMAC_01958.3_t1	665.686	-0.0705258	0.929331	-0.555166	0.212512	-0.975585	0.00643429	1.25571	0.000766659	0.674961	0.11928	0.613382	0.177837	-0.580754	0.227652	-0.642332	0.157548
SMAC_01959.3_t1	1928.17	-0.144505	0.721094	0.216778	0.440643	1.58482	6.24496e-15	-0.520702	0.0303766	-0.779659	0.000715202	-0.495417	0.0559574	-0.258957	0.42432	0.0252857	0.952105
SMAC_01960.3_t1	882.948	-0.473034	0.106988	-0.162137	0.573024	-0.9834	2.28304e-06	-0.0407875	0.90696	-0.466161	0.0634743	0.0539524	0.890525	-0.425374	0.121278	0.0947399	0.798826
SMAC_01961.3_t1	379.093	0.111032	0.844506	0.0828581	0.842088	0.447334	0.121443	0.43857	0.189894	-0.33631	0.373337	-0.282467	0.501323	-0.774881	0.020653	-0.721038	0.0332028
SMAC_01962.3_t1	343.172	0.315048	0.694886	-0.953382	0.0743781	-1.83723	2.24448e-05	-0.767877	0.134995	0.511572	0.381733	0.266308	0.708267	1.27945	0.012579	1.03418	0.0496179
SMAC_01963.3_t1	275.333	0.408399	0.338184	0.319582	0.370526	0.282556	0.343709	0.373417	0.271072	0.855527	0.00421727	0.230688	0.590727	0.482109	0.185648	-0.142729	0.765403
SMAC_01964.3_t1	9447.06	-0.100484	0.847268	-1.02086	0.000488097	-2.49069	1.9775e-24	-0.608071	0.0357816	0.309474	0.372219	0.379919	0.26798	0.917546	0.00153639	0.98799	0.000373521
SMAC_01966.3_t1	1485.74	-0.0589957	0.936182	-0.49485	0.225733	0.400021	0.248434	0.0445307	0.934795	0.505101	0.224321	0.412922	0.358996	0.46057	0.320451	0.368392	0.437859
SMAC_01967.3_t1	862.331	0.426928	0.559576	1.12001	0.0302899	0.456581	0.327086	0.237122	0.708559	0.246735	0.71448	0.38814	0.54915	0.00961338	0.99016	0.151019	0.843761
SMAC_01968.3_t1	530.407	0.0670921	0.919353	0.475514	0.206765	1.11489	0.000161212	0.15845	0.723964	-0.294409	0.485503	-0.0569466	0.923749	-0.452859	0.289437	-0.215396	0.662006
SMAC_01969.3_t1	222.742	0.0374523	0.950011	0.173543	0.629965	-0.865863	0.00104738	-0.288836	0.387619	0.409588	0.204413	0.0351014	0.944541	0.698425	0.0250643	0.323938	0.401933
SMAC_01970.3_t1	528.555	0.135341	0.754511	0.0304365	0.929938	0.305856	0.196975	0.30884	0.26539	0.396095	0.154493	0.0445932	0.920786	0.0872553	0.834264	-0.264247	0.427828
SMAC_01970.3_t2	0	NA	NA	NA	NA	NA	NA	NA	NA	NA	NA	NA	NA	NA	NA	NA	NA
SMAC_01971.3_t1	616.173	-0.0180018	0.97229	0.281274	0.376477	0.105389	0.712755	-0.193071	0.571401	-0.10462	0.796635	-0.220189	0.557533	0.0884508	0.849447	-0.0271187	0.955417
SMAC_01972.3_t1	161.501	-0.132715	0.912454	-0.622967	0.394336	-0.305931	0.633457	-0.182969	0.837042	0.112513	0.907732	0.322882	0.728294	0.295482	0.767219	0.505851	0.554721
SMAC_01973.3_t1	166.998	-0.627906	0.297175	-1.30936	0.00590895	-1.22008	0.00211923	0.223974	0.69247	-0.0892257	0.897645	0.121601	0.863543	-0.3132	0.631279	-0.102373	0.890018
SMAC_01974.3_t1	246.798	-0.431483	0.35991	-0.275989	0.489467	-1.27787	2.50537e-05	1.60506	3.48583e-08	0.200554	0.649711	-0.116971	0.828443	-1.40451	4.60877e-06	-1.72204	1.74683e-08
SMAC_01975.3_t1	377.234	-0.0338855	0.952439	0.454948	0.132402	-0.362718	0.164098	0.650716	0.015188	0.618365	0.0268549	0.437088	0.167329	-0.0323504	0.947653	-0.213628	0.576133
SMAC_01976.3_t1	199.413	-0.541303	0.236107	-0.38982	0.320994	0.251624	0.448667	-0.0034449	0.994289	0.095452	0.85367	0.342934	0.429506	0.0988969	0.862448	0.346379	0.439237
SMAC_01977.3_t1	1858.18	-0.102421	0.802733	-0.0183645	0.953332	-0.564638	0.00623604	-0.179835	0.517511	-0.4158	0.0953812	0.230283	0.433926	-0.235965	0.453157	0.410118	0.115135
SMAC_01978.3_t1	807.987	-0.209158	0.533561	-0.510545	0.0349754	-0.629025	0.00158726	-0.541611	0.0139652	-0.400189	0.0980994	-0.334685	0.202176	0.141421	0.683428	0.206926	0.499736
SMAC_01979.3_t1	1.16862	-1.70217	NA	0.927071	NA	2.12165	0.508644	1.72525	0.678789	0.72276	0.888852	-1.19177	NA	-1.00249	NA	-2.91701	0.534815
SMAC_01980.3_t1	763.49	-0.52928	0.267325	-0.899209	0.0182678	-1.05242	0.000850191	-0.731488	0.0417565	-0.294868	0.508398	0.0686662	0.911147	0.436619	0.34037	0.800154	0.034405
SMAC_01981.3_t1	296.225	0.167966	0.789111	0.700131	0.0704386	0.873244	0.00574495	0.418169	0.290938	0.157056	0.758935	0.0247994	0.968139	-0.261113	0.62299	-0.39337	0.399357
SMAC_01982.3_t1	943.506	-0.143916	0.821233	-0.889878	0.0194976	-0.541918	0.0984279	-0.176489	0.703501	-0.026195	0.963732	0.304638	0.514847	0.150294	0.792848	0.481128	0.261243
SMAC_01983.3_t1	169.145	-0.137809	0.848193	-0.191364	0.707	-0.133985	0.745764	-0.437098	0.329519	-0.0790556	0.899565	0.233	0.683758	0.358043	0.526919	0.670098	0.148299
SMAC_01984.3_t1	9791.38	-0.770909	0.431536	-0.921302	0.225631	-1.24039	0.0455544	-2.68472	1.81544e-05	-1.05555	0.164355	0.600183	0.501323	1.62917	0.0256984	3.2849	1.2864e-07
SMAC_01985.3_t1	44.8212	-2.06411	0.00142397	-2.48554	8.71178e-05	-2.26756	2.96707e-05	-3.18005	4.38723e-08	-4.01458	3.89311e-11	-3.53753	5.09811e-08	-0.834537	0.385804	-0.357484	0.756702
SMAC_01986.3_t1	109.725	-2.39414	0.000145442	-2.7709	9.66856e-06	-2.58462	2.23266e-06	0.610711	0.372424	-1.6987	0.00476162	-3.39605	4.35634e-08	-2.30941	8.89806e-05	-4.00676	6.1696e-11
SMAC_01987.3_t1	1073.16	0.0385057	0.939743	0.291839	0.306025	0.22831	0.34579	-0.0363226	0.922622	-0.15783	0.637327	0.158698	0.654803	-0.121508	0.76166	0.195021	0.575336
SMAC_01988.3_t1	1851.02	0.508269	0.316692	0.871493	0.02752	1.63637	2.98013e-07	-0.350341	0.413892	-0.672336	0.092167	-0.879353	0.0221431	-0.321995	0.541732	-0.529013	0.232716
SMAC_01989.3_t1	607.735	-0.491812	0.37317	-0.984869	0.0201019	-1.38814	6.68172e-05	1.15086	0.00193839	0.932615	0.0182208	0.804969	0.0537417	-0.218242	0.71997	-0.345888	0.509292
SMAC_01990.3_t1	522.285	-0.600917	0.262246	-1.10272	0.00978771	0.049427	0.911981	-0.320145	0.503786	-0.350487	0.478306	0.0683052	0.921993	-0.0303423	0.966489	0.38845	0.461974
SMAC_01991.3_t1	296.528	0.855539	0.00320394	-0.0706972	0.849255	-0.502552	0.0517706	1.0023	6.67785e-05	0.38688	0.213528	0.612038	0.036545	-0.615416	0.036874	-0.390258	0.236801
SMAC_01992.3_t1	3335.06	-0.198241	0.835834	0.14457	0.836785	0.00215493	0.996978	0.451202	0.475057	-0.525846	0.418717	-0.152887	0.858327	-0.977048	0.109924	-0.604089	0.371619
SMAC_01993.3_t1	1455.97	-0.1132	0.797052	-0.0163498	0.960392	-0.456623	0.0439978	0.0656636	0.852725	0.335532	0.237075	0.423478	0.127501	0.269868	0.413408	0.357814	0.224448
SMAC_01994.3_t1	718.634	0.375125	0.206174	0.132593	0.641302	1.16894	1.51173e-09	0.22423	0.3903	0.285297	0.278764	0.0113429	0.976593	0.0610673	0.8761	-0.212887	0.493604
SMAC_01995.3_t1	203.913	-0.648946	0.454351	-0.581768	0.401312	-4.44563	7.84711e-15	-2.71574	1.10612e-06	-0.939379	0.156584	0.504048	0.520821	1.77636	0.00506277	3.21979	7.33702e-09
SMAC_01996.3_t1	751.319	-0.0340753	0.957584	-0.096637	0.821411	-0.983906	0.000625061	-0.259541	0.503786	-0.066883	0.896495	0.324178	0.431997	0.192658	0.700508	0.583719	0.109138
SMAC_01997.3_t1	27.7741	0.566756	0.697593	0.453035	0.687505	0.355952	0.696109	0.360239	0.761925	0.513586	0.663291	1.19095	0.250612	0.153347	0.922339	0.830708	0.477525
SMAC_01998.3_t1	78.7578	0.319077	0.661634	0.142743	0.812184	-0.590936	0.175127	0.311762	0.571469	0.490191	0.354741	0.546712	0.324826	0.178429	0.805256	0.23495	0.729597
SMAC_01999.3_t1	725.756	-0.215769	0.746156	-0.551936	0.206795	0.448669	0.224935	0.0330036	0.953615	-0.327412	0.504639	0.0558814	0.934696	-0.360416	0.512827	0.0228777	0.973876
SMAC_02000.3_t1	1076.73	-0.193145	0.809534	-0.66278	0.185933	-0.936878	0.0217837	0.66574	0.164969	0.566785	0.279217	0.404619	0.492192	-0.0989549	0.900011	-0.261121	0.692756
SMAC_02001.3_t1	414.821	0.0540595	0.930012	0.0178422	0.964067	-1.70722	7.80046e-10	0.64784	0.0336094	0.452164	0.187441	1.07367	0.000205601	-0.195675	0.673408	0.425827	0.241728
SMAC_02002.3_t1	326.709	-0.125995	0.820798	-0.227334	0.540666	0.658456	0.0163184	0.220672	0.555537	-0.140197	0.748706	0.126395	0.793214	-0.360869	0.368388	-0.0942776	0.84969
SMAC_02003.3_t1	369.632	0.217341	0.680413	0.458986	0.19731	1.65452	9.77521e-10	0.45583	0.180814	0.499242	0.157234	0.309818	0.46009	0.0434127	0.939606	-0.146012	0.767385
SMAC_02004.3_t1	6451.22	0.536169	0.407079	1.08147	0.0263522	0.719963	0.0846968	-0.305488	0.589698	-0.499229	0.359896	-0.423103	0.47341	-0.193741	0.791845	-0.117615	0.874674
SMAC_02005.3_t1	882.111	0.410928	0.50764	0.557722	0.231192	0.612798	0.111733	0.363495	0.458187	-0.148881	0.809632	-0.349434	0.530617	-0.512376	0.338626	-0.712929	0.135159
SMAC_02006.3_t1	147.666	1.2176	0.0419031	1.06463	0.0563971	2.43306	2.59556e-08	0.741287	0.178281	1.11654	0.0349747	0.953558	0.0962255	0.37525	0.619734	0.212271	0.792197
SMAC_02007.3_t1	306.198	0.395821	0.351353	0.466062	0.168955	1.34564	2.27576e-07	0.510733	0.106205	0.319149	0.385287	0.744717	0.0183123	-0.191585	0.68117	0.233983	0.581021
SMAC_02008.3_t1	633.846	0.00721857	0.990531	0.382474	0.301423	0.889392	0.00191872	0.255329	0.513311	0.241278	0.561273	-0.0688527	0.90134	-0.0140517	0.980276	-0.324182	0.45119
SMAC_02009.3_t1	1017.3	-0.26418	0.727417	-0.580557	0.250731	1.37475	0.000491535	-0.193312	0.748817	-0.0438626	0.950922	0.17297	0.804827	0.14945	0.841237	0.366282	0.55095
SMAC_02010.3_t1	306.736	-0.0877238	0.903937	0.32014	0.477328	-0.178961	0.649014	-0.834496	0.0302377	-0.932183	0.0168402	-0.194337	0.736179	-0.0976872	0.884262	0.640159	0.153713
SMAC_02011.3_t1	1284.12	-0.404772	0.340394	-0.421174	0.219655	0.187275	0.543786	0.198547	0.605965	0.270348	0.475188	0.354632	0.346471	0.0718014	0.892096	0.156085	0.732458
SMAC_02012.3_t1	405.255	0.240758	0.608098	-0.0865346	0.828893	0.541475	0.0465212	0.283929	0.412572	0.181321	0.650635	0.24877	0.538175	-0.102608	0.836817	-0.0351588	0.947244
SMAC_02013.3_t1	4615.75	0.353103	0.322114	0.367667	0.200663	-0.0146613	0.958414	-0.279525	0.339325	-0.538147	0.0469989	-0.401333	0.17606	-0.258623	0.465852	-0.121808	0.754416
SMAC_02015.3_t1	207.053	-0.627723	0.207676	-0.686979	0.100688	-2.33894	6.30167e-11	1.40298	3.06719e-05	0.738318	0.0565858	0.522558	0.23414	-0.664662	0.111135	-0.880422	0.0228957
SMAC_02016.3_t1	686.969	0.839885	0.124715	1.07155	0.0222939	1.40424	0.000271861	-1.06507	0.0146308	-1.3474	0.00173019	-1.03575	0.0256067	-0.282334	0.681201	0.029322	0.970869
SMAC_02017.3_t1	614.378	0.328071	0.533399	-0.670162	0.0817135	-5.23808	4.87422e-45	-0.592126	0.107191	0.625192	0.099743	-0.90072	0.013134	1.21732	0.000460383	-0.308593	0.52495
SMAC_02018.3_t1	3351.05	-0.0970919	0.864658	-0.482692	0.156706	-6.36317	9.16054e-106	-0.290192	0.417676	0.271714	0.476416	-0.668236	0.0399686	0.561906	0.112126	-0.378044	0.324197
SMAC_02019.3_t1	960.776	-0.414992	0.414349	-0.973903	0.0099528	-1.31022	2.72946e-05	-0.297801	0.480632	-0.368125	0.392763	-0.663875	0.0897922	-0.0703247	0.912192	-0.366074	0.430492
SMAC_02020.3_t1	790.361	0.200899	0.640637	0.118664	0.735467	0.105034	0.707635	-0.429765	0.1326	0.222162	0.512716	0.0345596	0.941191	0.651927	0.0254271	0.464324	0.138218
SMAC_02021.3_t1	1111.18	0.904606	0.00027899	0.644204	0.0140294	-1.76638	5.86237e-16	0.261969	0.349468	0.67827	0.00518577	1.12736	5.32352e-07	0.416302	0.149693	0.865388	0.000266706
SMAC_02022.3_t1	877.246	-0.758755	0.134971	-0.0324657	0.953043	-11.6338	3.94272e-14	1.4234	0.000133204	1.34093	0.000431503	1.53334	4.40022e-05	-0.0824645	0.908086	0.109944	0.865022
SMAC_02023.3_t1	7.11557	-1.79635	0.36379	-1.5523	0.32768	-5.88827	0.00181159	0.766769	0.621412	-1.13565	0.484344	-0.20543	0.927452	-1.90242	0.231175	-0.972198	0.588723
SMAC_02025.3_t1	6.95141	-3.20954	0.12032	-1.32604	0.371126	-5.83813	0.00151493	0.115077	0.946229	-0.312485	0.863422	0.436566	0.813052	-0.427562	0.826008	0.321489	0.868415
SMAC_02027.3_t1	0	NA	NA	NA	NA	NA	NA	NA	NA	NA	NA	NA	NA	NA	NA	NA	NA
SMAC_02028.3_t1	2.83213	-1.33887	NA	0.764604	0.73774	-4.51024	0.0421266	-2.24432	0.349728	-1.42724	0.563105	0.246987	NA	0.817078	NA	2.49131	0.366438
SMAC_02030.3_t1	2.68441	-3.35049	NA	0.220387	0.923911	-1.18086	0.510436	-2.6788	0.231077	-2.73771	0.241408	-1.34608	NA	-0.0589074	NA	1.33272	0.6882
SMAC_02031.3_t1	3.75547	-2.27591	NA	-0.149357	0.937488	-5.45116	0.00539718	-2.15464	0.209525	-1.44715	0.421483	-0.644612	NA	0.707489	NA	1.51003	0.50867
SMAC_02032.3_t1	4.08489	-0.27937	NA	-1.70908	0.350869	-5.39472	0.00627105	-0.607744	0.754288	-2.18263	0.234148	-0.365301	NA	-1.57488	NA	0.242442	0.928952
SMAC_02033.3_t1	5.85697	0.505304	0.830566	0.610792	0.716162	-4.45809	0.019947	1.41477	0.309948	1.20678	0.428761	0.667349	0.740949	-0.207995	0.92319	-0.747425	0.695911
SMAC_02034.3_t1	1.12388	0.869021	NA	2.21719	NA	0.660856	0.887966	4.58593	0.296503	5.36327	0.230762	1.37943	NA	0.777338	NA	-3.20651	0.55058
SMAC_02035.3_t1	29.7462	-2.01915	0.0884904	-6.02667	0.00189248	-3.23733	0.00269378	3.14703	2.20907e-07	2.17889	0.000838669	-2.52318	0.0497151	-0.968144	0.208421	-5.67022	1.6941e-07
SMAC_02036.3_t1	17.1162	-1.36127	0.25244	-1.46362	0.140781	-5.58462	0.000999897	-0.177084	0.881965	0.132364	0.916385	0.406486	0.74412	0.309448	0.818341	0.58357	0.619131
[truncated: 8,027 more rows]
