# Supplementary material
Source: publisher figshare collection journal article supplement (https://gsajournals.figshare.com/articles/dataset/_/14883732)
Supplement: Supplementary file 1 [file 1]

## **Supplementary data for**

### **Functional characterization of the developmental genes *asm2*, *asm3*, and *spt3* required for fruiting body formation in the filamentous ascomycete *Sordaria macrospora***

by Ramona Lütkenhaus, Jan Breuer, and Minou Nowrousian

This file contains supplementary figures S1-S9 and supplementary tables S1, S2, and S4.  
Supplementary tables S3 and S5 are given as separate excel files.

**A**

*SMAC\_03952* locus  
in wild type

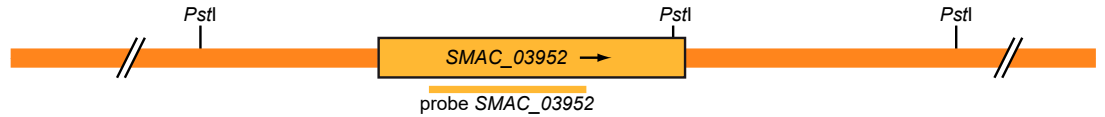

*SMAC\_3952* locus  
in  $\Delta$ *SMAC\_03952*

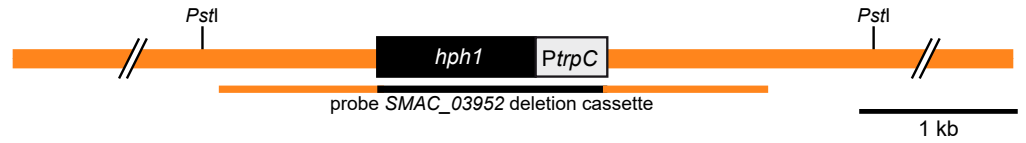**B**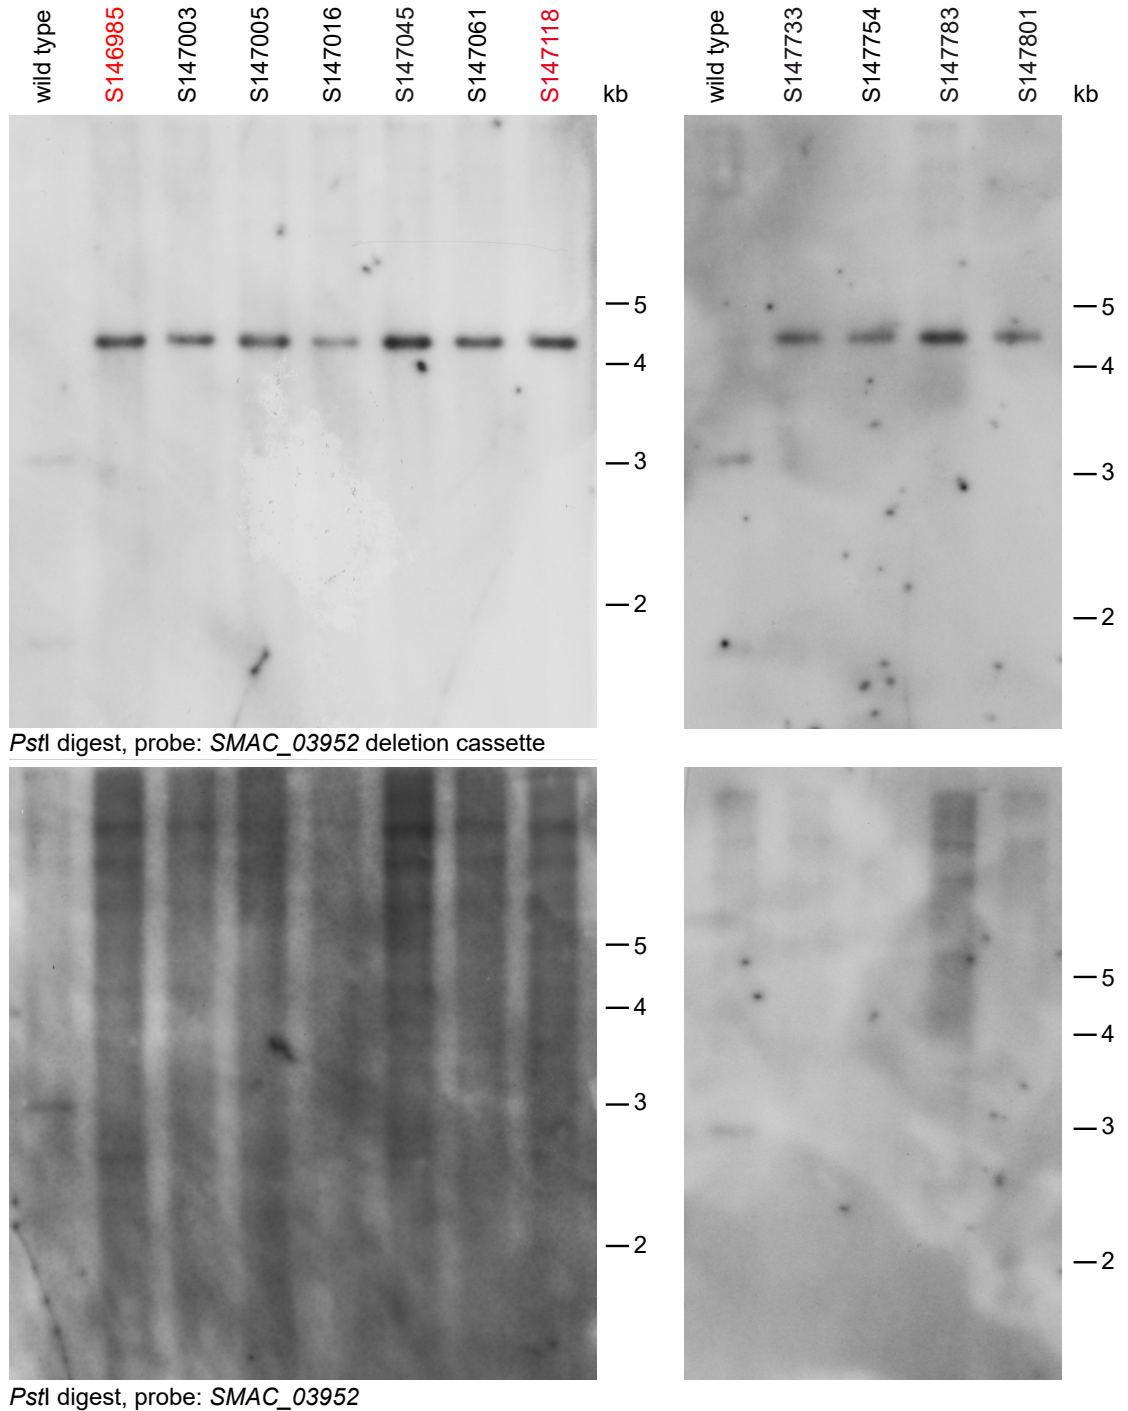

**Figure S1.** Southern blot analysis of  $\Delta$ *asm3* (=  $\Delta$ *SMAC\_03952*) deletion strains. **A.** Overview of the *SMAC\_03952* (*asm3*) genomic locus in the wild type and the corresponding deletion mutant, with the probes for the Southern blot indicated. **B.** Southern blot analysis of the wild type and eleven single spore isolates of two different independent primary transformants after digestion of genomic DNA with *PstI*. The blots were probed with the indicated probes. The resulting signals are as expected for the *SMAC\_03952* deletion for the single spore isolates (4.4 kb band when probed with the deletion cassette, and no signal when probed with the gene-specific probe), whereas the wild type gives bands of 1.8 and 3.0 kb when probed with the deletion cassette, and a 3.0 kb band with the gene-specific probe). Deletion strains that were used in this study are labelled in red.

|                        |     |                                                                                                                |     |
|------------------------|-----|----------------------------------------------------------------------------------------------------------------|-----|
| <i>S. macrospora</i>   | 1   | MREVNFSIPNVNKASVGITTALYDRRALDCTSTLPLINSLNHLAYLTTSSARIRDILTVDGGIERLVCILKEGR-----SKDMMMDM                        | 81  |
| <i>N. crassa</i>       | 1   | MREVNFSIPNVNKASVGITTALYDRRALDCTSTLPLINSLNHLAYLTTSSARIRDILTVDGGIERLVCILKEGR-----SKDMMMDM                        | 81  |
| <i>F. graminearum</i>  | 1   | MREVNFSIPNVNKASVGITTALYDRRALDCTSTLPLINSLNHLAYLTTSSARIRDILTVDGGIERLVCILKQGR-----SKDMMMDM                        | 81  |
| <i>S. sclerotiorum</i> | 1   | MREVNFSIPNVNKASVGITTALYDRRALDCTSTLPLINSLNHLAYLTTSSARIRDILTVDGGVVERLVCILKAGR-----SKDMMMDM                       | 81  |
| <i>A. nidulans</i>     | 1   | MREVNFSIPNVNKASVNITTTLYDRRALDCTSTLPLINSLNHLAYLTTSSARIRDILTVDGGIERLVCILKEGR-----SNNLMEM                         | 81  |
| <i>P. nodorum</i>      | 1   | MREVNFSIPNANKASVGITTALYDRRALDCTSTLPLINSLNHLAYLTTSSARIRDILTVDGGIERLVCILKEGR-----SKDMMMDM                        | 81  |
| <i>A. nigricans</i>    | 1   | MREVNFSIPNVNKASVGITTALYDRRALDCTSTLPLINSLNHLAYLTTSSARIRDILTVDGGIERLVCILKEGR-----SKDMMMDM                        | 81  |
| <i>P. confluens</i>    | 1   | MREVNFSIPNANKASVGITTALYDRRALDCTSTLPLINSLNHLAYLTTSSARIRDILTVDGGIERLVCILKEGR-----SKELMSM                         | 81  |
| <i>S. cerevisiae</i>   | 1   | MRDSNHRSLTSNKPVIITTTSTVYDRRALINSLPLINSNLTYLTLDSNKGVRETAVNDGALERLVLSTLRSCHLISLFEILLDDLENFNEHENIKDLWEKRLALCA     | 107 |
| <i>Y. lipolytica</i>   | 1   | MRESNFRSVPSNRSASVTITTTLYDRRALDCTSDKPLINSLNHLTYLTLSSARVREITCTDGGGLERLVAIMKTCQE-----SKHDDKHSDNLLVA               | 90  |
| <i>S. macrospora</i>   | 82  | WKWNLAFCQVNVNIGVRGTENVTRVVEADMVPIATILDNLIKVIERVREKAEAKHK--SDPHHRH-----VGGSSRVHKSASFSSSRPTN-----                | 166 |
| <i>N. crassa</i>       | 82  | WKWNLAFCQVNVNIGVRGTENVTRVVEADMVPIATILDNLIKVIERVREKAEAKHK--SDPHHRH-----ISGSNRVHKSASFSSSRPTN-----                | 166 |
| <i>F. graminearum</i>  | 82  | WKWNLAFCQVNVNIGVRGTENVTRVVEADMVPIATILDNLIKAVDKCKREKAEAKQKQYNDNHRHGHVYTQNPKPSASNSASANASASASSAAVGTSAFGHRSG       | 188 |
| <i>S. sclerotiorum</i> | 82  | WKWNLAFCQVNVNIGVRGTENVTRVVEADMVPIATILDNLIKVVDRCKREKAEAKQKALLEHRRHQTGR-----SGDHRSTHKGPSFGNRASR-----             | 169 |
| <i>A. nidulans</i>     | 82  | WKWSLAFCQVNVNIGVRGSENVRTRVVEADMVPIATILDNLIKVMKDKVARSDEAQRRHRHQLHHK-----ITPTASDSTSRSSFSASSN-----                | 168 |
| <i>P. nodorum</i>      | 82  | WKWNLAFCQIFNIGVRGSENVRTRVVEADMVPIATILDNLIKVVDKCKARADLHRSARLGASSRHH-----SSRSGEMASGSGSHSHSHS-----                | 170 |
| <i>A. nigricans</i>    | 82  | WKWNLAFCQVNVNIGVRGTENVTRVVEADMVPIATILDNLIKVVDRCKREKAEAKQKALLEHRRHQTGR-----NAKKAQAGHNNVGNRRARAL-----            | 155 |
| <i>P. confluens</i>    | 82  | WKWNLAFCQVNVNIGVRGSENVRTRVVEADMVPIATILDNLIKQVMEKVRQR-----NAKPQPRDTRTSEF-----                                   | 146 |
| <i>S. cerevisiae</i>   | 108 | KKWILTLTFCQLTCTRGTEQIRKKVVMGVLVSLVTLVDNLYLHKNYDFIKDQT-----MTDFDKGITITETMYKFMRKD-----                           | 182 |
| <i>Y. lipolytica</i>   | 91  | WKWLAFCQCLVFTCTRGTEAIRKRIVEAGLLVLATVLDNLYLLMDEDAKEQELQRRRAEVEQEQMQRQ-----ADDKDRSDAVTASNFGISLCGSTREVSADKE       | 191 |
| <i>S. macrospora</i>   | 167 | --VDVDQRAFRRQAAFPIDVSAT---LAGPSTEVAAPDTETPTTASRFSG--QTLGERTLFSAHRSHHHHHGGRTQ--ESQSAVPSPTRHEIQPPTSAAGPSSVENI    | 264 |
| <i>N. crassa</i>       | 167 | --IDVDQRAFRRQAAFPIDVSIT---LAGPSTEAAAPDTETPTTASRFSG--QILGERTLFSAHRSHHHHHGGVRTQ--DSQSAVPSPTRHESQPPAPAGPSSVENV    | 264 |
| <i>F. graminearum</i>  | 189 | PRVDATQRQRSHRGPSPSIDVSAS---YAGPSTAAPTQHPQQQSLDTAMGGSQWQSQSATERSTSWGSARHQPLRVRGLEDHHAATTSAPRQTMQPLATAVP--ATDAV  | 290 |
| <i>S. sclerotiorum</i> | 169 | --FESEFASRRRQPPPSIDIPSN---FSGAPLTAGSDAMDITPTGPQFAL--TSPPERTTFSAHRRHHNRNQDARQH-----FLSPRHNIQPLATAVPSMDAAD       | 261 |
| <i>A. nidulans</i>     | 169 | -----EORTSRRRQPPPTHEIPFF---FHDTRAVESNAADVSPPRAPMTS---PPERSTGQDTYAHRSAPLRH-----RAIQPLATAVPSMDAAD                | 250 |
| <i>P. nodorum</i>      | 171 | -----HRSERSSRAIPPEIEIPA---FAQQAQAQAESQLGDATQTPAFSLSSPERTTNNRGRPPHHHHRSHEG-----RAQLFGAAPTTRTG--                 | 254 |
| <i>A. nigricans</i>    | 156 | -----SGVRSRQRPATPNFIDIPSQNEPLATHTHALAPGHRPNASQLPVDHPAFPLAQQARTVGVPDRHQLGLRPIF-----PHQVPAERHMAAL                | 241 |
| <i>P. confluens</i>    | 147 | -----TRRTGHEASDIPNN---LNTTDHILTLPRPQIQDIQIPAFNRNAQQQVAGDSRQFPQLTN--TREQS-----GLTNLQIPNDL                       | 223 |
| <i>S. cerevisiae</i>   | 183 | -----ENETYQOYEFITG---QDKLKLSTDKNFLNERLVAPSMITPTDFSDIWGRFADLASNFEPDQE-----                                      | 243 |
| <i>Y. lipolytica</i>   | 192 | RENTPGQSQSQGQAARRDCRLHSAISSAVSSVSLRCRTQSAVPDEPQAGSSRESSLQSSFSSSMIDSASSTSTTTTIMN-----SSTTTITPSLRQLLSE           | 287 |
| <i>S. macrospora</i>   | 265 | DGFSRAVREADRLRNMAPFAHANLTSQPASPTTFLP-----TNVRPPSILAPNGRSRRRPSIRHQHSTAETDDMNT--DSVASDENQDAEMS--GTGDVQN--DVEI    | 361 |
| <i>N. crassa</i>       | 265 | DSFARVRETRDLRLNMGFFAHTNLTSQPASPTTFLP-----TSVRPPSILAPNGRSRRRPSIRHQHSTAGETDDMNT--DSVASDENQDAEMS--GTADVQN--EVGI   | 361 |
| <i>F. graminearum</i>  | 291 | EGFVRPVRDRLRIASMAPGSDLVSQPTSPPTPLPPQMRSPVTPRPSALPGSGRSRRRPSIRHQNSTA--DADDING--DSMPSPESPEAEMT--GTDNLQS--AVGI    | 392 |
| <i>S. sclerotiorum</i> | 267 | GENIRPVRDVRRLPSVMVPGQGLTSQESPTTFLP--AQIRSPVVRTSMVGTTPRSRRRPSIRHQASTAADTEDMNA--DSMASDESSEGPEDITGVSTAEIQSTNVNI   | 366 |
| <i>A. nidulans</i>     | 251 | GSGLRPPVRDTERLPSMLPAAFNELASQDPSPTTFSG-----AGHIRSNVHVPIGTHARPLPSQHSTSGSDSDANGE--DSIMADDTGSGQSRRIPIGLQSRMIDD     | 350 |
| <i>P. nodorum</i>      | 255 | -----LGQPLVTALPSMDRKPPTESR-----CGPSPTRQOLSVSGESDLEAQDEIVADNAAVAGPVNEPIVGIQNEINM                                | 325 |
| <i>A. nigricans</i>    | 242 | VGSQAARDDVRMPAMVQAGGASLPVSPPTTNP-----LGGTFNSRTAP--RNGR--LSRRQRSVSGESDDPDS-----DMSNAPVS--MVTENESILDV            | 307 |
| <i>P. confluens</i>    | 224 | TG--LQPVRDADRPLPSMLQPGVPSQPTSPATGAPPV-----NAGTYQDRTQTTRTGRIYAIRHQRSISGESFDATN-----DINHQTQP-----NEPIVDI         | 327 |
| <i>S. cerevisiae</i>   | 244 | -----RHDDIDIDSEVESENFDAHKNFSSQDIN-----RPTISITPREFFLGRIVPKQ-----DDVIWSL                                         | 299 |
| <i>Y. lipolytica</i>   | 288 | SAILRSGASVESFDTATQNSSSQSDNDQAMVDTDTG-----LALFAERDADGDVEMGSDDFPRRLQASQPQQQQQQQQQPAQPGQPTVTGTATPRPGPGV           | 385 |
| <i>S. macrospora</i>   | 362 | QQVSVEDGDGIMTG--AALDLATPTASEA--QEAGTFNITHQGAVDASMEN--NTTPTQVTNLHLSPNRPTIANTAQPTMPNNSVPRLYLLDRHVTNPNQMLAAMPREE  | 463 |
| <i>N. crassa</i>       | 362 | QQVSVEDGDGIMTG--AALDLVTPPTASEA--QEAGTFNITHQGAVDTSMEN--NATPTQVTNLGLSPNRPETIANTAQPSMNSRVPHYLLDRHVTNPNQMLAAMPREE  | 463 |
| <i>F. graminearum</i>  | 393 | QDITMEDGDTMLGG--TALDLATPTVSETH--QEASTFNINHRSPLDGSLTN--NNAPTVPVPAIGLSPNRPAMATPPQPPLAATTVPRLYLLDRNFVNPQMVAAMPREE | 495 |
| <i>S. sclerotiorum</i> | 367 | QDVMNDENSMLTAVETPIGLTTPPTVSEA--QDAGTFNITHRSADIGSMIN--DATPTGTPTIGLSAQPATVNTP--PTMLPTTIPRYFLDRPTPPQGGVLAAMPREE   | 469 |
| <i>A. nidulans</i>     | 351 | DADRQTVIDSVTDS--SHDLTVTDTTSDG--QESETFNITHRSADVSGIIT--NDN-----AQAVNNANSPIVPSYSLYFRDRTNIATQNFINTMPREE            | 440 |
| <i>P. nodorum</i>      | 326 | SDIVDN--AEMLDAGTTPVPIAASEGTD--ENNETFNITHRALDGLSLINPTTPTNPITGFSPMQFAINVVNTNPPP-----AWYPRADRNVAAQYSAAMPREE       | 424 |
| <i>A. nigricans</i>    | 328 | S--GVVVDQD--SVADPMTLDEGHDPER--QDADFNTIHRSPLDGSLAN--GRTOANNALS-----PNPPTINPGLAIAPALQPSRFPMENASSATLPTMPREE       | 421 |
| <i>P. confluens</i>    | 308 | QSGVDMERDSMMESVDEPMALPLTHTEAQ--DIAETFNITHRSPIDGSLINPAGPVNPIVGFS-----PNPPTINPTFSIGSLQMRN---PAESPSVVPSSMPREE     | 404 |
| <i>S. cerevisiae</i>   | 300 | QLLAFVSKYTYMKSTLQNLVESLSFRS---MAYKKQRISEENDLEE--QERDVTVKLSSLYLYLSKNPENNKSIGVLDTSKMDPFFKELEELSNCRCQEEQNE        | 400 |
| <i>Y. lipolytica</i>   | 386 | APVTAQAQAISIQSSIASMPRIFFENGILMPRDDVWALEILAYVSYSYSTKBEICTCHFVDPDLRLDRKNLPLPLRRAAVQPLMRSKFGSHGEGDVVKTVLDVDEDD    | 492 |
| <i>S. macrospora</i>   | 464 | DVLMSQLLLAYVSKYCNLRKYFQKCHLVPKLIGKEIKLLDG-----IDPAELEAELEAEDECEEEYLLPNDQNIFFLVEKFTVRYH--STDMQYWAGVVMRNL        | 562 |
| <i>N. crassa</i>       | 464 | DVLMSQLLLAYVSKYCNLRKYFQKCHLVPKLIGKEIKLLDG-----TDPTLEAELEAEDECEEEYLLPNDQNIFFLVEKFTVRYH--STDMQYWAGVVMRNL         | 562 |
| <i>F. graminearum</i>  | 496 | DVLMSQLLLAYVSKYCGLSRYFQKSHLVPLKIGKELAAIDKDI--T--AMDEEDVPEVYDEADDEEYLLTNDFNLFPLVEKFTVRYH--STDMQYWAGVVMRNL       | 597 |
| <i>S. sclerotiorum</i> | 470 | DVLMSQLLLAYVSKYCNLRSYFQQSHLVPLKIGSELHLLDVEENA---SSNANPSTACSSSHSHDDEEYLLPDDFNIFFLVEKFTVRRH--SQDMQYWAGVVMRNL     | 572 |
| <i>A. nidulans</i>     | 441 | DVLMSQLLLAYVSKYCNLSYFQNSHFVPLKIDRELRMLDEG-----ASPVELIEEEDYLLPDDVNIFFLVEKFTVRRH--SKDMSYWACVVMRNL                | 532 |
| <i>P. nodorum</i>      | 425 | DVLMSQLLLAYVSKYCNLRSYFQKSHLVPLKIGSDLQFTGDE-----DVAAAEAKQDEDEELEEYLLPDDFNIFFLVEKFTVRRH--YWASVVMRNL              | 511 |
| <i>A. nigricans</i>    | 422 | DVLMSQLLLAYVSKYCELRTYFQRSHLVPSLSIKNELYLLDDES-----ERVPAACVKDCQEID--EYLLPDDYNIFFLVEKFTVRRH--PPDMQYWAGVVMRNL      | 520 |
| <i>P. confluens</i>    | 405 | DVLMSQLLLAYVSKYCNLRTYFQRSHLVPLSTIEPELYLLDDEH-----RHNAASAAAHHKHEEYLLPDYNIFFLVEKFTVRRH--PQDMQYWAGVVMRNL          | 504 |
| <i>S. cerevisiae</i>   | 401 | ICNNHCPVNLNLFERYRVPKPSDDNAYGDKKERINLRKKISDNFERR-----WSYDKMKKELTNIVYKNKVLTNVNNIFFLVEKYTVSAENTHDVIYSSVIMRNSC     | 501 |
| <i>Y. lipolytica</i>   | 493 | YKGKICVDETADVGVDDQLDDRTQKQREITAFHKRVTRKSHRKKTDWEKAYDITYDFESEDICAEFLGETINVFPIVEKFTIREY--SNEIQYWAGVIMRNSC        | 598 |
| <i>S. macrospora</i>   | 563 | RKDDTRGGIRQCAYYQCGKWEETRQFAKRCRCRRTKYCSKECQKSAWAFHRHWCIAATP-----                                               | 622 |
| <i>N. crassa</i>       | 563 | RKDDTRGGIRQCAYYQCGKWEETRQFAKRCRCRRTKYCSKECQKSAWAFHRHWCIAATP-----                                               | 622 |
| <i>F. graminearum</i>  | 598 | RKDDTRGGIRQCAYYQCGKWEETRQFAKRCRCRRTKYCSKECQKSAWAFHRHWCIAATQ-----                                               | 657 |
| <i>S. sclerotiorum</i> | 573 | RKDDARGGIRQCAYYQCGKWEETRQFAKRCRCRRTKYCSKECQKSAWVHRHWCVAASQ-----                                                | 632 |
| <i>A. nidulans</i>     | 533 | RKDESRRGIRQCANIKCGKWEETRQFAKRCRCRRTKYCSKDCQKAWLHYRHWCAATP-----                                                 | 590 |
| <i>P. nodorum</i>      | 512 | RKDDSRGGIRQCAYYQCGRWEETRQFAKRCRCRRTKYCSKECQKSAWVHRHWCVAATS-----                                                | 571 |
| <i>A. nigricans</i>    | 521 | RKDDSRGGIRQCAYYECGKWEETRQFAKRCRCRRTKYCSKDCQKRAWVYHRHWCVAASQ-----                                               | 580 |
| <i>P. confluens</i>    | 505 | RKDDSKGGIRQCAYYECGKWEETRQFAKRCRCRRTKYCSKECQKSAWVYHRHWCVAAP-----                                                | 564 |
| <i>S. cerevisiae</i>   | 502 | RKNEIL--VRQCANFSCGWEDFPQFAKRCRCRRTKYCSRKQQLKAWGYHYRYWCEHVGSSSHMRSTNTTTGVNTPNEPSSLNATATAADVSNSTSTFTPNISTTVP     | 607 |
| <i>Y. lipolytica</i>   | 599 | RKNEARGGIRQCAHFDCGKWEETFPQFAKRCRCRRTKYCSRECKLAWNYHKKHWCSTNPPNVASSRSGSSAVTSSAASVSSVSTASTVATATVATVNRMASGGTVA     | 705 |
| <i>S. macrospora</i>   |     | -----                                                                                                          |     |
| <i>N. crassa</i>       |     | -----                                                                                                          |     |
| <i>F. graminearum</i>  |     | -----                                                                                                          |     |
| <i>S. sclerotiorum</i> |     | -----                                                                                                          |     |
| <i>A. nidulans</i>     |     | -----                                                                                                          |     |
| <i>P. nodorum</i>      |     | -----                                                                                                          |     |
| <i>A. nigricans</i>    |     | -----                                                                                                          |     |
| <i>P. confluens</i>    |     | -----                                                                                                          |     |
| <i>S. cerevisiae</i>   | 608 | DEISNRDENSIPE-----                                                                                             | 620 |
| <i>Y. lipolytica</i>   | 706 | SGTEGFNPSPNNAASASSASTATVAGGSQSTLSNSRQSMFRSTR                                                                   | 749 |

**Figure S2.** Multiple alignment of ASM3 orthologs from several ascomycetes. Orthologs were determined by bidirectional BLASTP analyses. The following proteins were used (in the order they appear in the alignment): *Sordaria macrospora* ASM3 (SMAC\_03952.3, XP\_003348106.1), *Neurospora crassa* (XP\_960655.1), *Fusarium graminearum* (XP\_011327228.1), *Sclerotinia sclerotiorum* (XP\_001587555.1), *Aspergillus nidulans* (SamB, XP\_657682.1), *Parasitagonospora nodorum* (XP\_001806167.1), *Ascodesmis nigricans* (TGZ80500.1), *Pyronema confluens* (CCX09978.1), *Saccharomyces cerevisiae* (Mub1p, NP\_013818.1), *Yarrowia lipolytica* (XP\_503528.1). The zf-MYND (MYND finger) domain is indicated by a black bar above the sequences.

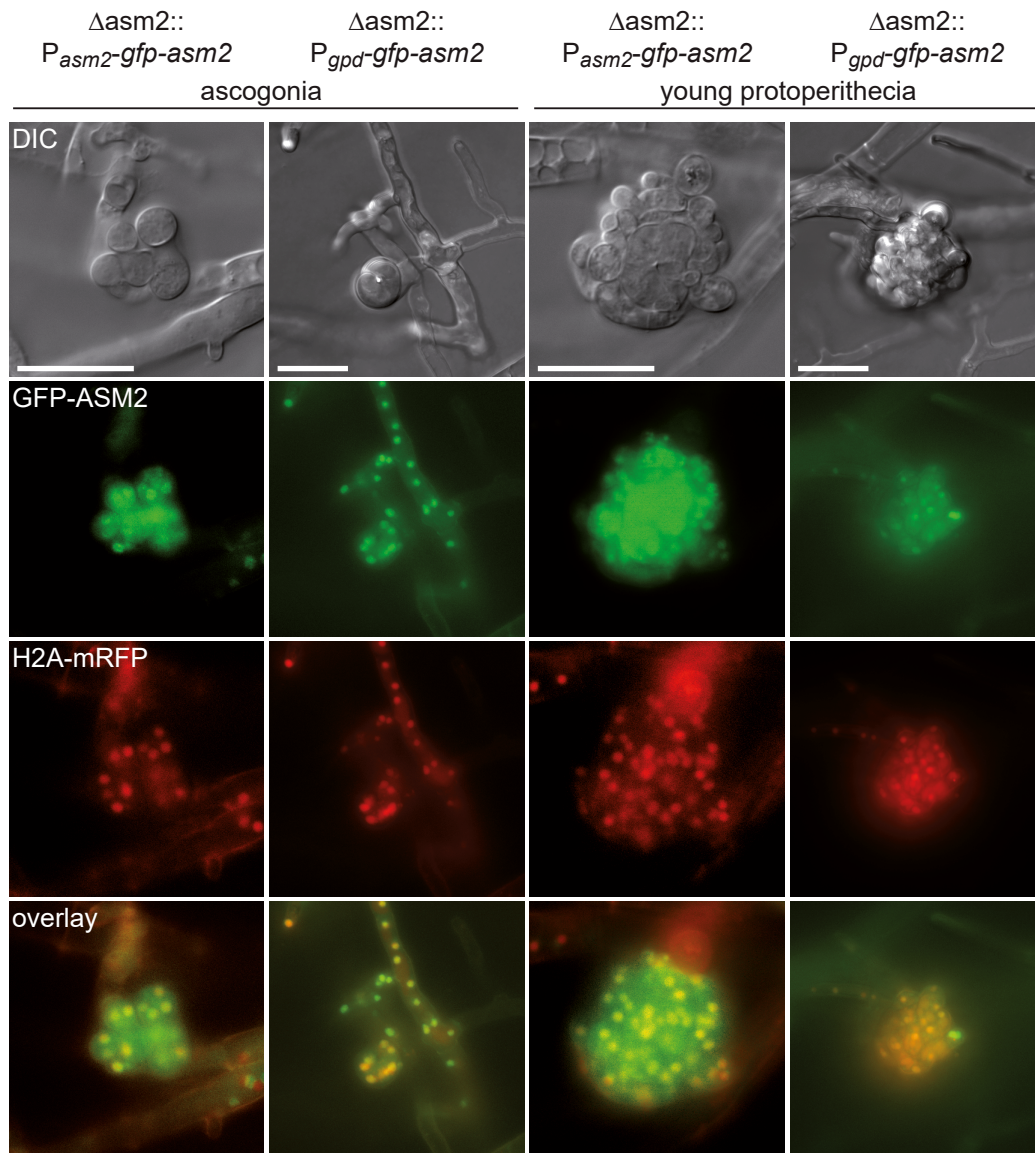

**Figure S3.** Localization of N-terminal GFP-tagged ASM2. Co-localization studies with histone H2A-mRFP revealed the nuclear localization of ASM2 ascogonia and young protoperithecia. Scale bars 20  $\mu\text{m}$





**Figure S4.** RNA-seq results of *asm2*, *asm3*, and *spt3* expression. **A-C.** RNA-seq reads do not map to deleted regions of *asm2*, *asm3* and *spt3* in the corresponding deletion mutants. The figure shows the gene regions of *spt3* (A), *asm3* (B) and *asm2* (C) in the genome browser Artemis (Carver et al. Bioinformatics 2012, 28:464-9). Within the gene region, the forward DNA strand and the three forward open reading frames (A, C) or both DNA strands and all six open reading frames (B) are shown with vertical black lines indicating stop codons within the open reading frames. The annotated coding sequences are given in blue, the annotated mRNAs are given in grey. The coverage plot shows the coverage for all samples derived from the indicated strain. Within the mapped reads, split reads (indicating intronic regions) are interrupted by grey horizontal bars. The region that was deleted in the deletion mutants is indicated by a double arrow. Please note that in case of *spt3*, the coding region was not deleted completely (Lütkenhaus et al. 2019, Genetics 213: 1545-1563). As expected, read coverage of the deleted regions is lost in the corresponding mutants. However, RNA-seq reads can still be derived from the 5' and 3' regions that were not deleted in the mutant strains. **D.** Expression of *asm2*, *asm3*, and *spt3* in different strains and conditions. Log<sub>2</sub>-fold changes in gene expression for the indicated comparisons are given. Numbers in grey indicate expression values for a gene in the corresponding deletion mutant, which are derived from reads mapping to the remaining 5' and 3' regions of the transcript as indicated in A-C and do not actually indicate expression of a functional gene. None of the genes was significantly differentially expressed in any of the analyzed conditions.

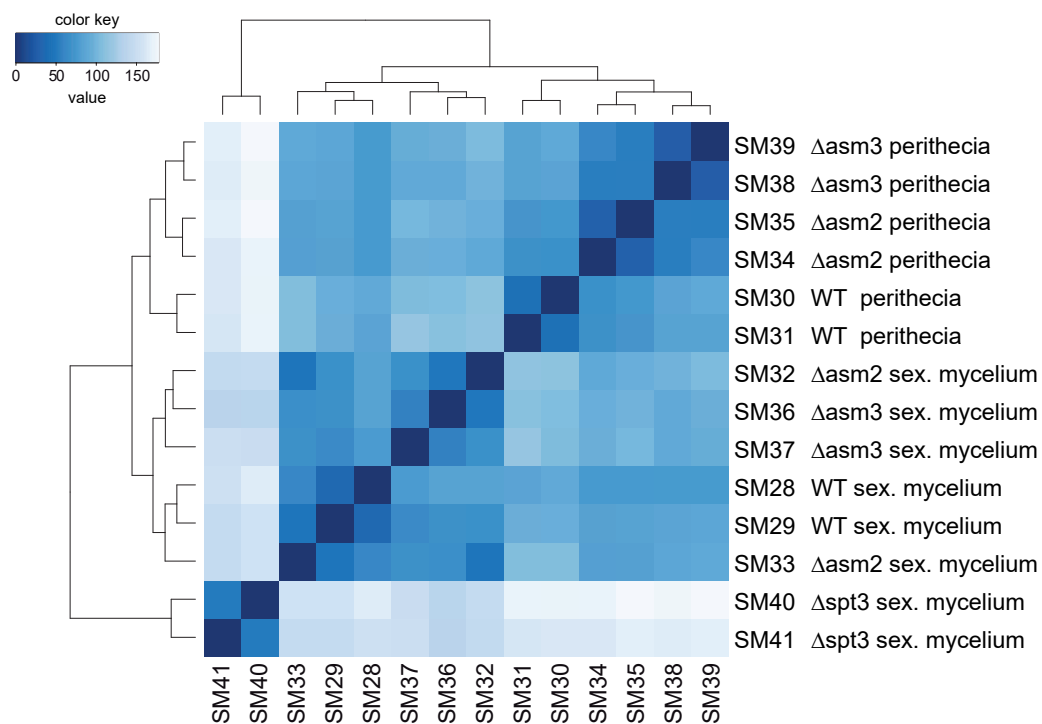

**Figure S5.** Heatmap of Euclidean distance between normalized read counts from RNA-seq samples (variance-stabilized data, analysis was performed with DESeq2). There are two independent biological replicates per condition. Except for the two replicates of sexual mycelium from  $\Delta$ asm2 (samples SM32 and SM33), the two independent samples from each condition cluster together. The two samples from  $\Delta$ spt3 cluster separately from all other samples.

### up-regulated - 20 most significantly enriched categories (GO)

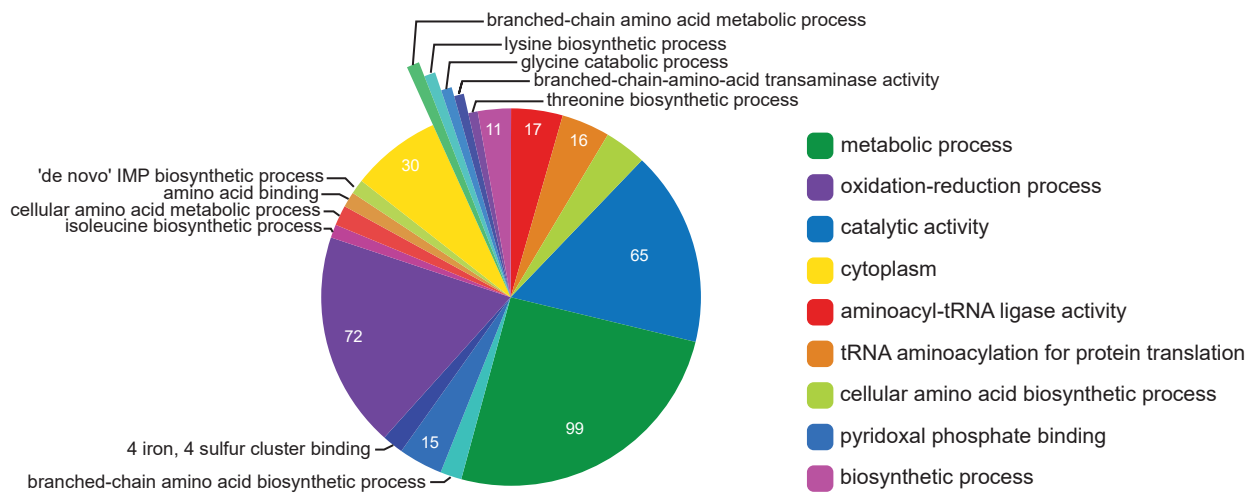

### down-regulated - 15 significantly enriched categories (GO)

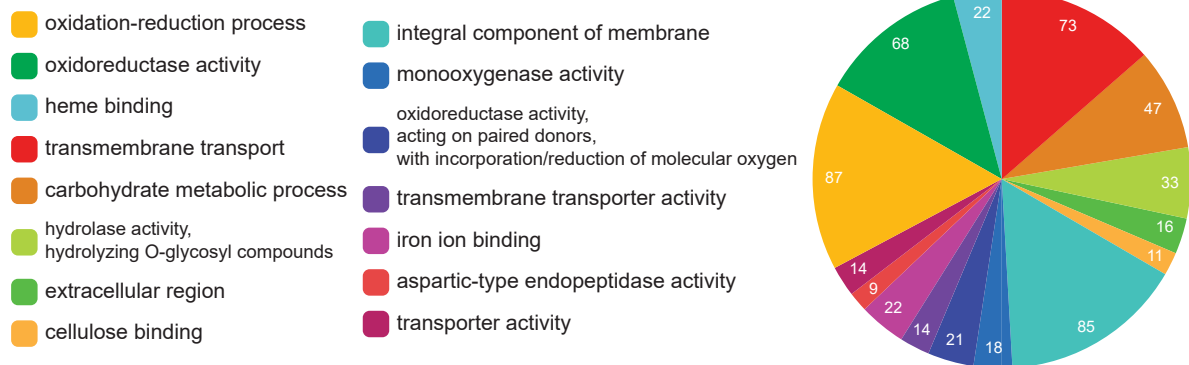

**Figure S6.** Pie charts representing results of gene ontology (GO) analysis of genes that are differentially regulated in  $\Delta$ spt3. Differentially up- and down-regulated genes were significantly enriched in 20 and 15 different categories, respectively. In both cases, mainly categories of primary metabolism were enriched. Numbers in pie chart sections give the number of genes that belong to each category (a gene can belong to more than one category).



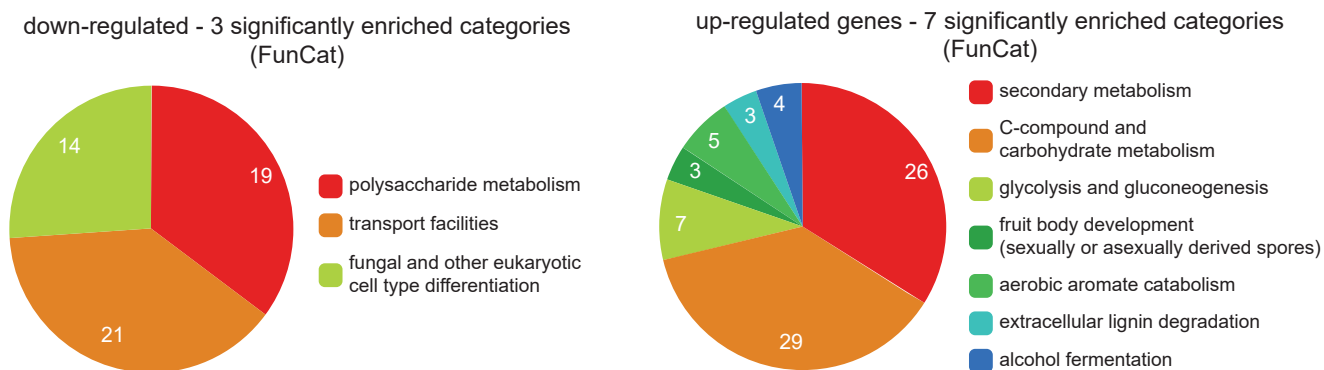

**Figure S7.** Pie charts of significantly enriched categories for differentially regulated genes in wild type perithecia. Functional category (FunCat) analysis was performed with the corresponding proteins of down- and up-regulated genes, respectively, in wild type perithecia. Numbers in pie chart sections give the number of genes that belong to each category (a gene can belong to more than one category).

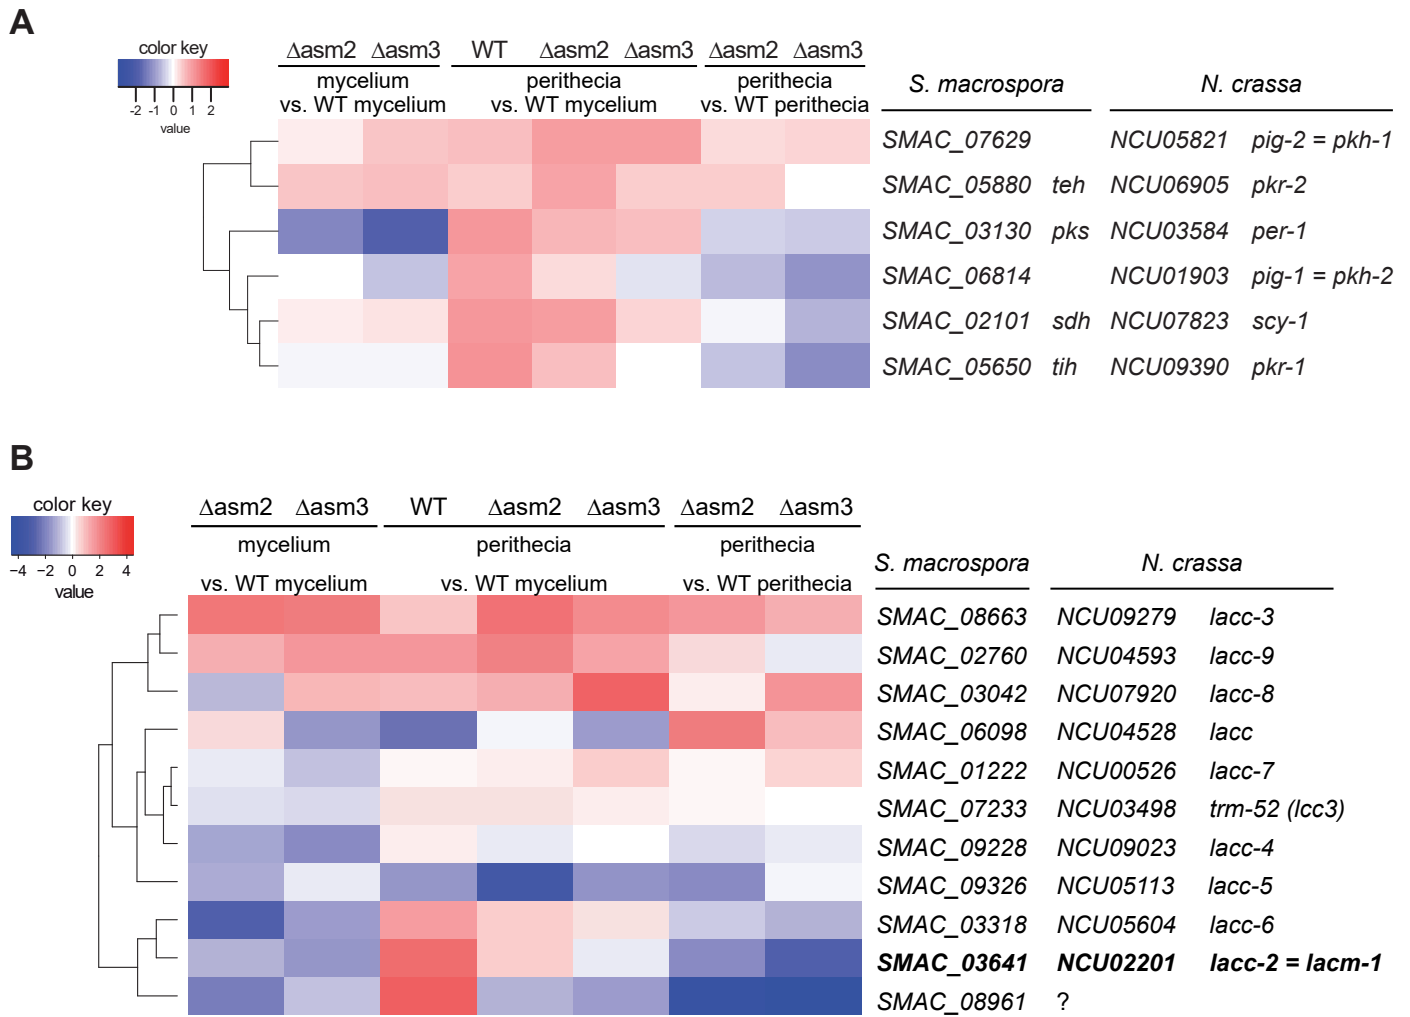

**Figure S8.** Heatmaps of expression of melanin biosynthesis genes **(A)** and laccase genes **(B)** in  $\Delta$ asm2 and  $\Delta$ asm3 mutants. *S. macrospora* locus tags and gene names (if available) as well as locus tags and gene names of *N. crassa* orthologs are given on the right side. The DESeq2 comparisons are listed above the heatmaps. The putative laccase gene *SMAC\_03641*, whose ortholog *NCU02201* is involved in melanin biosynthesis (Ao et al. 2019, Fungal Biol. 123:1-9) is indicated in bold in B.

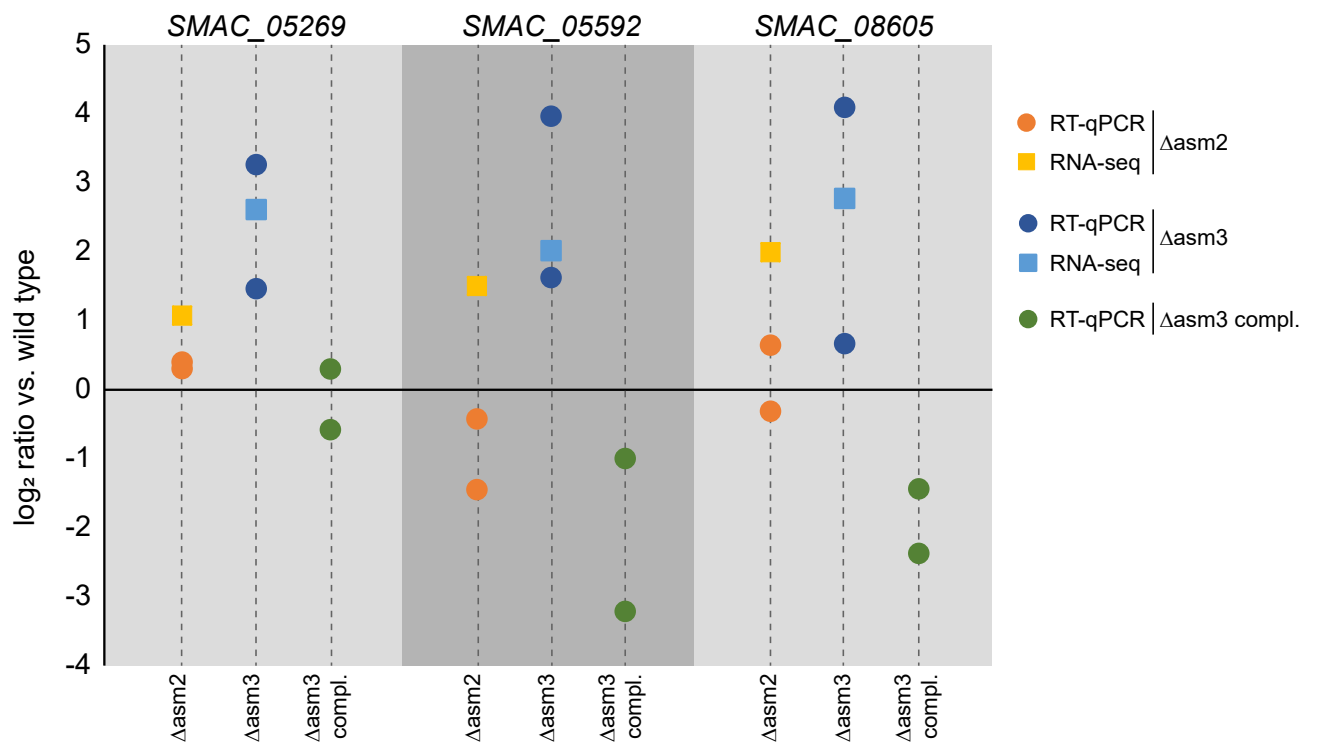

**Figure S9.** Expression of orthologs to *N. crassa* MSUD genes *sad-1*, *sad-2*, and *sms-2* in perithecia of *S. macrospora*. Transcript levels in perithecia of the  $\Delta\text{asm2}$  and  $\Delta\text{asm3}$  mutants as well as a complemented  $\Delta\text{asm3}$  strain expressing *asm3* under a constitutive promoter ( $\Delta\text{asm3 compl.}$ ) were compared to transcript levels in wild type perithecia by RNA-seq or RT-qPCR for the three genes *SMAC\_05269* (*sad-1* ortholog), *SMAC\_05592* (*sad-2* ortholog), and *SMAC\_08605* (*sms-2* ortholog). Data points give results of two biologically independent RT-qPCR experiments as well as RNA-seq data for the deletion mutants. Strains used in the experiments were S148734 ( $\Delta\text{asm2}$ ), S146985 ( $\Delta\text{asm3}$ ) and 6.3 AS2 ( $\Delta\text{asm3 compl.}$ ). For *SMAC\_05269* and *SMAC\_05592*, mean ratios are significantly larger (t-test at  $p < 0.05$ ) in  $\Delta\text{asm3}$  compared to the wild type as well as compared to  $\Delta\text{asm2}$  and the complemented  $\Delta\text{asm3}$  transformant. For *SMAC\_08605*, the difference is statistically significant between  $\Delta\text{asm3}$  and the complemented transformant, but not between  $\Delta\text{asm3}$  and  $\Delta\text{asm2}$ .

**Table S1.** Oligonucleotides used in this study.

| Name               | Sequence                                                             | Remarks                                                                             |
|--------------------|----------------------------------------------------------------------|-------------------------------------------------------------------------------------|
| SMAC_03952-ko1     | gtaacgccagggttttcccagtcac<br>gaagggatcccatcagatttgaccc<br>gagggcggtc | amplification of upstream region of <i>asm3</i> for cloning of deletion vector      |
| SMAC_03952-ko2     | cgagggcaaaggaatagggttcggt<br>tgaggcttggttgccaccacgagt<br>gtcga       | amplification of upstream region of <i>asm3</i> for cloning of deletion vector      |
| SMAC_03952-ko3     | gccccaaaatgctccttcaatatca<br>gttgctttggacgtttacggaacga<br>tatcc      | amplification of downstream region of <i>asm3</i> for cloning of deletion vector    |
| SMAC_03952-ko4     | gcggataacaatttcacacaggaaa<br>cagcgatccttggtggtcctccaac<br>attggttctc | amplification of downstream region of <i>asm3</i> for cloning of deletion vector    |
| HR-P3952_fw        | tgagcgcgcgtaatacgaactcacta<br>tagcttcgatggctggatagcaaac<br>gtcc      | cloning of <i>asm3</i> complementation vector                                       |
| HR-T3952_rv        | catgattacgccaagcgcgcaatta<br>acggacttgctagagccaagtcgag<br>tcg        | cloning of <i>asm3</i> complementation vector                                       |
| SMAC_03952-ORF2    | tgtttgatgatttcagtaacgttaa<br>gttcatggcgtggcggcaatgcacc<br>agtgg      | cloning of <i>asm3</i> complementation vector                                       |
| SMAC_03952-ORF3    | cgcagcttgactaacagctacagat<br>ctatgaggggaagtcaacttcagcat<br>accca     | cloning of <i>asm3</i> complementation vector                                       |
| HR-3952.3_int_rv_1 | acgagtgtcgaggtaggcaccagac<br>g                                       | sequencing of <i>asm3</i> complementation vector                                    |
| HR-3952.3_int_rv_2 | atgccgctccaaccactttaagctc<br>c                                       | sequencing of <i>asm3</i> complementation vector                                    |
| SMAC_03952-ver1    | ccccctctggcctctggcctctcc                                             | verification of homologous integration of <i>asm3</i> deletion vector or sequencing |
| SMAC_03952-ver2    | ctgttcgtgtcgatggttgagttg                                             | verification of homologous integration of <i>asm3</i> deletion vector               |
| SMAC_03952-ver3    | cgtggtcaacattggtgtaagagg                                             | verification of homologous integration of <i>asm3</i> deletion vector or sequencing |
| SMAC_03952-ver4    | gatgaaggttggtgacttgagtgg                                             | verification of homologous integration of <i>asm3</i> deletion vector or sequencing |
| pN03952seq1        | accgaagattggcgattgg                                                  | sequencing of <i>asm3</i> complementation vector                                    |
| pN03952seq2        | cgtgtcacggtaacgaccac                                                 | sequencing of <i>asm3</i> complementation vector                                    |
| pN03952seq3        | gcttggggacaaggtggcatt                                                | sequencing of <i>asm3</i> complementation vector                                    |
| pN03952seq4        | attgccgccacgccaatgatt                                                | sequencing of <i>asm3</i> complementation vector                                    |
| pN03952seq5        | gcatcatcggttggtggttc                                                 | sequencing of <i>asm3</i> complementation vector                                    |

| Name             | Sequence                                                              | Remarks                                                                                              |
|------------------|-----------------------------------------------------------------------|------------------------------------------------------------------------------------------------------|
| 09436-N-GFP_fw   | catggacgagctgtacaagagcggc<br>cgcatgtcgtcggtcgttaggtc                  | cloning of <i>asm2</i> complementation vector                                                        |
| 09436-N-GFP_bw   | ggatccactagttctagagcggccg<br>ctatacaccaccgcccatgaa                    | cloning of <i>asm2</i> complementation vector                                                        |
| HR-9436_-FT_fw   | atcaacaagaccctcccagcatgcg<br>tcgcccctgttgctggttagaaccat<br>tggtggcgcc | cloning of <i>asm2</i> complementation vector<br>with partially deleted fungal specific TF<br>domain |
| HR-9436_-FT_rv   | cgccaccaatggttctaacgacaac<br>aggggcgacgcatgctgggagggtc<br>ttgttgat    | cloning of <i>asm2</i> complementation vector<br>with partially deleted fungal specific TF<br>domain |
| Sm-9436.3_int2fw | ctgctccaacggtagttgc                                                   | sequencing of <i>asm2</i> complementation<br>vector                                                  |
| Seq_9436-i_fw    | tagcctggaaaactttgc                                                    | sequencing of <i>asm2</i> complementation<br>vector                                                  |
| Seq_9436-i_rv    | aagctggcaatgtcaatgtg                                                  | sequencing of <i>asm2</i> complementation<br>vector                                                  |
| n9346_rv         | ggcgaagatacgatcgacgg                                                  | sequencing of <i>asm2</i> complementation<br>vector                                                  |
| dSMU_1           | cgatggctgtgtagaagtactcgc                                              | sequencing of deletion vector or<br>verification of homologous integration                           |
| dSMU_5           | gtgttgacctccactagctccagc                                              | sequencing of deletion vector or<br>verification of homologous integration                           |
| 1751             | gccatattttcctgctctcc                                                  | sequencing of complementation vectors                                                                |
| 1757             | agctgacatcgacaccaacg                                                  | sequencing of complementation vectors                                                                |
| egfp-fw          | ggtgaacttcaagatccg                                                    | sequencing of complementation vectors                                                                |
| 426-14           | ttaagttgggtaacgccagg                                                  | sequencing of complementation and<br>deletion vectors                                                |
| 426-15           | ttgtgtggaattgtgagcgg                                                  | sequencing of complementation and<br>deletion vectors                                                |
| SMAC_05269_for   | TTCGGCGGCTGATAGTGGTG                                                  | for RT-qPCR                                                                                          |
| SMAC_05269_rev   | TGGGCTCTCAGACTGCGAAG                                                  | for RT-qPCR                                                                                          |
| SMAC_05592_for   | acgggcatgtaccatcctcg                                                  | for RT-qPCR                                                                                          |
| SMAC_05592_rev   | cccgtacgatgaagtgggct                                                  | for RT-qPCR                                                                                          |
| SMAC_08605_for   | TGGCAAGCAACAGCCTGATG                                                  | for RT-qPCR                                                                                          |
| SMAC_08605_rev   | AGCGGCCCAAGATTAGACCC                                                  | for RT-qPCR                                                                                          |
| SMAC_08534_for   | ATTGACCAGATCCGCGTCGT                                                  | for RT-qPCR                                                                                          |
| SMAC_08534_rev   | TGTCTCCGAACAGCCAACCA                                                  | for RT-qPCR                                                                                          |
| SSU1             | ATCCAAGGAAGGCAGCAGGC                                                  | for RT-qPCR                                                                                          |
| SSU2             | TGGAGCTGGAATTACCGCG                                                   | for RT-qPCR                                                                                          |

**Table S2. SAGA complex subunits in *S. macrospora* determined by bi-directional BLASTp analysis.** Published SAGA complex subunits of *S. cerevisiae* and *A. nidulans* were used to identify orthologous proteins in *S. macrospora* by BLASTp. Rows highlighted in grey represent results of DELTA-BLASTp, since BLASTp did not reveal an ortholog. The homolog for SMAC\_01263 was found only in a BLAST search with the corresponding *A. nidulans* protein. The identity values in the last column give the identity of the *S. macrospora* and *S. cerevisiae* proteins except for SMAC\_01263, where the identity to the *A. nidulans* protein is given. No *S. macrospora* homolog was identified for the *S. cerevisiae* Sus1p protein. However, the Sus1p protein is a rather small protein of 96 amino acids in yeast, therefore it is possible that a possible homolog was not annotated during the automated annotation of the *S. macrospora* genome. A TBLASTN search of the *S. macrospora* genome sequence using the *S. cerevisiae* Sus1p and *A. nidulans* AN7253 proteins as query also did not give any results, although for short proteins it is possible that the search might have been confounded by introns in the encoding gene (if one exists in *S. macrospora*).

| Modul      | <i>S. cerevisiae</i> <sup>1</sup> | <i>A. nidulans</i> <sup>2</sup> | e-value   | <i>S. macrospora</i> | e-value   | identity        |
|------------|-----------------------------------|---------------------------------|-----------|----------------------|-----------|-----------------|
| <b>HAT</b> | Ada2p YDR448W                     | AN10763 (AdaB)                  | 1E-106    | SMAC_01149           | 4.00E-109 | 210/504 (41%)   |
|            | Ada3p YDR176W                     | AN0440                          | 1E-46     | SMAC_00331           | 2.00E-40  | 136/460 (29%)   |
|            | Gcn5p YGR252W                     | AN3621 (GcnE)                   | 2,00E-135 | SMAC_00218           | 0         | 232/352 (65%)   |
|            | Sgf29p YCL010C                    | AN0668                          | 1,00E-23  | SMAC_06921           | 2.00E-07  | 41/120 (34%)    |
| <b>DUB</b> | Sgf11p YPL047W                    | AN8685                          | 9,20E-02  | SMAC_01263           | 4,00E-54  | 97/246(39%)     |
|            | Sgf73p YGL066W                    | AN11747                         | 1,00E-17  | SMAC_01972           | 5.00E-16  | 37/60 (61%)     |
|            | Sus1p YBR111W-A                   | AN7253                          | 3,80E-02  | no homolog           | -         | -               |
|            | Ubp8p YMR223W                     | AN3711                          | 1,00E-56  | SMAC_03509           | 2.00E-48  | 115/364 (31%)   |
| <b>Spt</b> | Ada1p YPL254W                     | AN10953                         | 2,00E-17  | SMAC_05567           | 7.00E-17  | 2267/250 (26%)  |
|            | Spt3p YDR392W                     | AN0719 (SptC)                   | 2,00E-75  | SMAC_01829           | 1.00E-71  | 154/346 (44%)   |
|            | Spt7p YBR081C                     | AN4894                          | 1,00E-89  | SMAC_03720           | 2.00E-51  | 107/255 (41%)   |
|            | Spt8p YLR055C                     | AN4670 (AcdX)                   | 4,00E-46  | SMAC_00178           | 9.00E-48  | 85/199 (42%)    |
|            | Spt20p YOL148C                    | AN0976 (RefE)                   | 1,00E-08  | SMAC_07789           | 2,00E-18  | 57/332(17%)     |
|            | Tra1p YHR099W                     | AN8000                          | 0         | SMAC_04066           | 0         | 1184/3292 (35%) |
| <b>Taf</b> | Taf5p YBR198C                     | AN0292                          | 8,00E-115 | SMAC_04450           | 6.00E-106 | 212/702 (30%)   |
|            | Taf6pp YGL112C                    | AN8232                          | 1,00E-90  | SMAC_05148           | 6.00E-93  | 163/405 (40%)   |
|            | Taf9p YMR236W                     | AN0794                          | 3,00E-30  | SMAC_02869           | 9.00E-24  | 60/143 (41%)    |
|            | Taf10p YDR167W                    | AN0154                          | 4,00E-14  | SMAC_00049           | 2.00E-21  | 60/156 (38%)    |
|            | Taf12p YDR145W                    | AN2769                          | 1,00E-28  | SMAC_03663           | 3.00E-12  | 67/189 (35%)    |
|            | Chd1p YER164W                     | AN1255                          | 0         | SMAC_02791           | 0         | 484/1124 (43%)  |

<sup>1</sup> Setiaputra et al. (2015) <sup>2</sup> Georgakopoulos et al. (2013)

Georgakopoulos, P., R.A. Lockington, and J.M. Kelly, 2013 The Spt-Ada-Gcn5 Acetyltransferase (SAGA) Complex in *Aspergillus nidulans*. *PLoS One* 8 (6):e65221.

Setiaputra, D., J.D. Ross, S. Lu, D.T. Cheng, M.Q. Dong *et al.*, 2015 Conformational flexibility and subunit arrangement of the modular yeast Spt-Ada-Gcn5 acetyltransferase complex. *The Journal of biological chemistry* 290 (16):10057-10070.



**Table S4. *N. crassa* orthologs of 19 down-regulated genes in  $\Delta$ sp<sup>t</sup>3 leading to a developmentally relevant phenotype upon deletion.** The table gives the *N. crassa* gene ID followed by its name, and resulting phenotype regarding the sexual development. Gene IDs labelled in green indicate that the corresponding mutants do not form perithecia, gene IDs in orange indicate that no ascospores are formed, gene IDs in orange indicate other developmental phenotypes. The last two columns give the *S. macrospora* gene locus tag of the corresponding ortholog (determined by BLASTp) as well as its (putative) product or conserved domain.

NA = not applicable; NF = not formed

| gene ID  | gene name                  | mating type | Proto. no. | proto. morphology | perith. no. | perith. morphology | ascospore no. | ascospore morphology | locus tag  | product description / domain  |
|----------|----------------------------|-------------|------------|-------------------|-------------|--------------------|---------------|----------------------|------------|-------------------------------|
| NCU01386 | <i>ada-10</i> <sup>1</sup> | mat a       | normal     | smaller size      | NF          | NA                 | NF            | NA                   | SMAC_08362 | GAL4 TF; fungal_TF_MHR        |
| NCU01706 | <i>vsd-6</i> <sup>1</sup>  | mat a       | normal     | normal            | NF          | NA                 | NF            | NA                   | SMAC_02413 | PRO46; MYB DNA binding TF     |
| NCU03868 |                            | N/A         | normal     | normal            | NF          | NA                 | NF            | NA                   | SMAC_06291 | NADPH oxidase (NOX)           |
| NCU05758 | <i>pre-2</i> <sup>2</sup>  | mat A       | normal     | normal            | normal      | normal             | normal        | normal               | SMAC_08994 | PRE2                          |
|          |                            | mat a       | increased  | normal            | NF          | NA                 | NF            | NA                   |            |                               |
| NCU07617 | <i>acon-3</i> <sup>3</sup> | N/A         | normal     | normal            | NF          | NA                 | NF            | NA                   | SMAC_07309 | putative ACON3                |
| NCU09915 | <i>fsd-1</i> <sup>1</sup>  | N/A         | normal     | normal            | NF          | NA                 | NF            | NA                   | SMAC_01666 | putative NDT80; TF            |
| NCU00097 | <i>bek-1</i> <sup>1</sup>  | mat a       | normal     | normal            | normal      | no beaks           | NF            | NA                   | SMAC_08102 | HOX TF                        |
| NCU00499 | <i>ada-1</i> <sup>4</sup>  | mat a       | reduced    | normal            | reduced     | no beaks           | NF            | NA                   | SMAC_00439 | bZIP TF                       |
| NCU01451 |                            | mat a       | normal     | normal            | normal      | abnormal beaks     | NF            | NA                   | SMAC_07019 | hypothetic protein            |
| NCU07530 | <i>trm-35</i> <sup>*</sup> | N/A         | normal     | normal            | normal      | normal             | NF            | NA                   | SMAC_09388 | putative transporter SMF2     |
| NCU07874 |                            | N/A         | reduced    | normal            | normal      | abnormal beaks     | NF            | NA                   | SMAC_08416 | RRM1_PUB1 domain              |
| NCU01269 | <i>div-5</i> <sup>*</sup>  | N/A         | normal     | normal            | reduced     | normal             | NF            | NA                   | SMAC_05745 | CDC20/HCT1 protein            |
| NCU06390 |                            | N/A         | normal     | normal            | normal      | normal             | NF            | NA                   | SMAC_00965 | PAS <i>superfamily</i> domain |
| NCU08634 | <i>vsd-1</i> <sup>1</sup>  | mat a       | normal     | normal            | reduced     | normal             | NF            | NA                   | SMAC_09090 | Forkhead TF                   |
| NCU09064 | <i>stk-53</i> <sup>5</sup> | N/A         | normal     | normal            | normal      | normal             | NF            | NA                   | SMAC_05225 | putative STK53, kinase        |
| NCU01093 | <i>stp-3</i> <sup>*</sup>  | N/A         | normal     | smaller size      | normal      | normal             | normal        | normal               | SMAC_03168 | putative S/T phosphatase      |
| NCU16491 | <i>tcf-20</i> <sup>1</sup> | mat a       | normal     | normal            | normal      | normal             | normal        | normal               |            |                               |
|          |                            | mat A       | normal     | smaller size      | normal      | normal             | normal        | normal               | SMAC_04819 | GAL4 TF, fungal_TF_MHR        |
| NCU00786 | <i>gpr-1</i> <sup>2</sup>  | mat a       | normal     | normal            | normal      | abnormal beaks     | normal        | normal               | SMAC_01468 | G-Protein coupled receptor    |
| NCU09427 | <i>gpr-3</i> <sup>2</sup>  | mat a       | normal     | normal            | normal      | abnormal beaks     | normal        | normal               | SMAC_05685 | G-Protein coupled receptor    |

\* <https://fungidb.org/fungidb/>; <sup>1</sup> Carrillo et al. (2017); <sup>2</sup> Cabrera et al. (2015); <sup>3</sup> Chung et al. (2011); <sup>4</sup> Tian et al. (2011); <sup>5</sup> Park et al. (2011)

- Cabrera, I.E., I.V. Pacentine, A. Lim, N. Guerrero, S. Krystofova *et al.*, 2015 Global analysis of predicted G protein-coupled receptor genes in the filamentous fungus, *Neurospora crassa*. *G3 (Bethesda)* 5 (12):2729-2743.
- Carrillo, A.J., P. Schacht, I.E. Cabrera, J. Blahut, L. Prudhomme *et al.*, 2017 Functional profiling of transcription factor genes in *Neurospora crassa*. *G3 (Bethesda)* 7 (9):2945-2956.
- Chung, D.W., C. Greenwald, S. Upadhyay, S. Ding, H.H. Wilkinson *et al.*, 2011 *acon-3*, the *Neurospora crassa* ortholog of the developmental modifier, *medA*, complements the conidiation defect of the *Aspergillus nidulans* mutant. *Fungal genetics and biology* 48 (4):370-376.
- Park, G., J.A. Servin, G.E. Turner, L. Altamirano, H.V. Colot *et al.*, 2011 Global analysis of serine-threonine protein kinase genes in *Neurospora crassa*. *Eukaryotic Cell* 10 (11):1553-1564.
- Tian, C., J. Li, and N.L. Glass, 2011 Exploring the bZIP transcription factor regulatory network in *Neurospora crassa*. *Microbiology* 157 (Pt 3):747-759.
